# Supplementary material for: Cobalt catalyzed practical hydroboration of terminal alkynes with time-dependent stereoselectivity
Source: PubMed Central journal article supplement (PMC10928171; doi:10.1038/s41467-024-46550-y), 2024-03-12
Supplement: 41467_2024_46550_MOESM1_ESM.pdf [file 41467_2024_46550_MOESM1_ESM.pdf]

# Supplementary Information

## **Cobalt catalyzed practical hydroboration of terminal alkynes with time-dependent stereoselectivity**

Jinglan Wen,<sup>1,2</sup> Yahao Huang,<sup>1,2</sup> Yu Zhang,<sup>1,2</sup> Hansjörg Grützmacher,<sup>2,3</sup> Peng Hu\*<sup>1,2,4</sup>

<sup>1</sup>Institute of Green Chemistry and Molecular Engineering, School of Chemistry, Sun Yat-sen University, Guangzhou 510006, PR China

<sup>2</sup>Lehn Institute of Functional Materials, School of Chemistry, Sun Yat-sen University, Guangzhou 510006, PR China

<sup>3</sup>Department of Chemistry and Applied Biosciences, ETH Zürich, Zürich 8093, Switzerland

<sup>4</sup>State Key Laboratory of Structural Chemistry, Fujian Institute of Research on the Structure of Matter, Chinese Academy of Sciences, Fuzhou, Fujian 350002, PR China

\*Correspondence to: [hupeng8@mail.sysu.edu.cn](mailto:hupeng8@mail.sysu.edu.cn)

## Table of Contents

|                                                                                    |     |
|------------------------------------------------------------------------------------|-----|
| <b>1. General Method</b> .....                                                     | 2   |
| <b>1.1 Materials and methods</b> .....                                             | 2   |
| <b>1.2 Synthesis of Ligand</b> .....                                               | 2   |
| <b>1.3 Synthesis of substrate</b> .....                                            | 4   |
| <b>2. General procedure for condition optimization</b> .....                       | 6   |
| <b>3. Substrate investigation and characterization</b> .....                       | 12  |
| <b>4. Time-dependent Z/E selective transformation</b> .....                        | 28  |
| <b>5. Large scale reaction</b> .....                                               | 37  |
| <b>6. Mechanistic Study</b> .....                                                  | 38  |
| <b>6.1 Procedure for monitoring the hydroboration of phenylacetylene</b> .....     | 38  |
| <b>6.2 Procedure for kinetic experiments of catalyst concentration</b> .....       | 38  |
| <b>6.3 Deuterium labeling experiments</b> .....                                    | 39  |
| <b>6.4 Kinetic isotope effects experiment:</b> .....                               | 44  |
| <b>6.5 Inhabitation experiment with inert alkyne:</b> .....                        | 46  |
| <b>6.6 Kinetic trace of Z-selective products:</b> .....                            | 46  |
| <b>6.7 HRMS of in situ formed (CNC-<sup>i</sup>Pr)Co(II) complex:</b> .....        | 47  |
| <b>6.8 Single crystal of (CNC-<sup>i</sup>Pr)<sub>2</sub>Co(III) complex</b> ..... | 49  |
| <b>6.9 HRMS of in situ formed (CNC-<sup>i</sup>Pr)Co(I)H complex:</b> .....        | 52  |
| <b>6.10 Detection of H<sub>2</sub> by gas chromatography</b> .....                 | 54  |
| <b>7. NMR spectra</b> .....                                                        | 55  |
| <b>8. References</b> .....                                                         | 118 |

# 1. General Method

## 1.1 Materials and methods

All air- and moisture-sensitive manipulations were carried out using standard Schlenk techniques or in an M. Braun inert atmosphere glovebox containing an atmosphere of purified nitrogen. Solvents for air- and moisture sensitive manipulations were dried and deoxygenated using literature procedures. Reagents were purchased from Energy Chemical, Bidepharm, Aladdin, TCI, Adamas-Beta, and Alfa used without further purification unless otherwise stated. Commercially available terminal alkynes were used before recrystallization or distillation, and stored at -20 °C. DMF was purchased from Alfa (Stock No.: 43465, anhydrous, amine free), used without further purification and stored in dark at -20 °C. Gas chromatography-mass spectrometry analysis was performed on an Agilent 5977B and Agilent GC/MSD 8890 GC system. High resolution mass spectra were obtained from Orbitrap LC/MS (Q Exactive). <sup>1</sup>H NMR spectra were recorded at 400 MHz or 600 MHz, <sup>13</sup>C NMR spectra were recorded at 101 MHz or 151 MHz, on a Bruker AVANCE III 400 (400 MHz) or Bruker AVANCE III 600 (600 MHz). <sup>1</sup>H NMR chemical shifts were determined relative to the signal of the residual protonated solvent: CDCl<sub>3</sub> δ 7.26. <sup>13</sup>C NMR chemical shifts were determined relative to CDCl<sub>3</sub> at δ 77.16. Data for <sup>1</sup>H NMR are reported as follows: chemical shift (δ ppm), multiplicity (s = singlet, d = doublet, t = triplet, m = multiplet, q = quartet, br = broad), integration, coupling constant (Hz). <sup>13</sup>C NMR spectra was reported as chemical shifts in ppm and multiplicity where appropriate.

## 1.2 Synthesis of Ligand

### Synthesis of CNC-<sup>i</sup>Pr

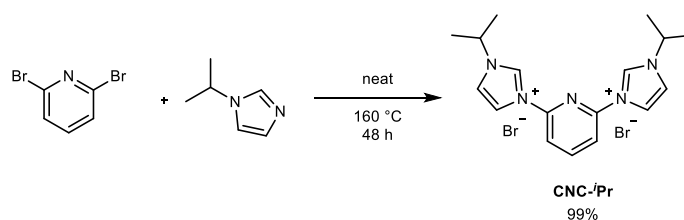

The title compound was synthesized according to a reported procedure with modifications<sup>[1]</sup>. In a nitrogen atmosphere, a pressure tube with the 1-isopropyl-1H-imidazole (66 mmol, 7.3 g) and 2,6-dibromopyridine (31 mmol, 7.6 g) was sealed and heated for 48 h at 160 °C. After cooling to room temperature, the brown mixture was triturated several times with DCM and Et<sub>2</sub>O. The product was obtained as an off-white powder in 99% yield (14.3 g). [See spectrum](#)

<sup>1</sup>H NMR (600 MHz, DMSO-d<sub>6</sub>) δ 10.63 (s, 2H), 8.91 (s, 2H), 8.63 (t, J = 8.1 Hz, 1H), 8.32 (m, 4H), 4.88 (hept, J = 6.7 Hz, 2H), 1.63 (d, J = 6.7 Hz, 12H). The data is in accordance with the published results<sup>[1]</sup>.

## Synthesis of CNC-H

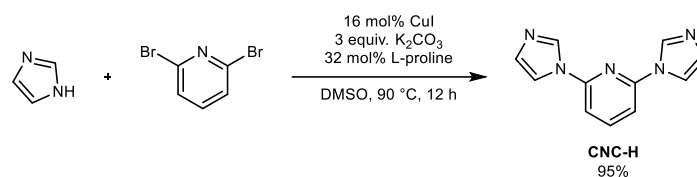

The title compound was synthesized according to a reported procedure<sup>[2]</sup>. In a nitrogen atmosphere, a pressure tube with 2,6-dibromopyridine (590 mg, 2.5 mmol), imidazole (375 mg, 5.5 mmol), CuI (71 mg, 0.4 mmol), L-proline (87 mg, 0.8 mmol), K<sub>2</sub>CO<sub>3</sub> (1.03 g, 7.5 mmol) and DMSO (3 mL) was sealed and heated for 12 h at 90 °C. After cooling to room temperature, 250 mL H<sub>2</sub>O was added into the reaction mixture. The reaction mixture was extracted with dichloromethane (3×250 mL). The combined organic layers were washed with H<sub>2</sub>O (5×300 mL) and dried with Na<sub>2</sub>SO<sub>4</sub>. The solvent was removed using reduced pressure and the residual solid was recrystallized from a mixture of dichloromethane and ether; the title compound was afforded as a white solid (500 mg; yield: 95%). [See spectrum](#)

<sup>1</sup>H NMR (400 MHz, Chloroform-d)  $\delta$  8.39 (s, 2H), 7.97 (t,  $J = 8.0$  Hz, 1H), 7.67 (s, 2H), 7.30 – 7.24 (m, 4H). The data is in accordance with the published results<sup>[2]</sup>.

## Synthesis of CNC-Me

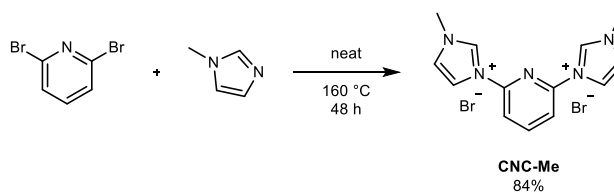

The title compound was synthesized using the identical methodology as CNC-*Pr*. The reaction of 1-methyl-1H-imidazole (2.4 g, 30 mmol) and 2,6-dibromopyridine (2.96 g, 12.5 mmol) afforded CNC-Me as a white solid (4.2 g, 84%). [See spectrum](#)

<sup>1</sup>H NMR (400 MHz, DMSO-*d*<sub>6</sub>)  $\delta$  10.49 (s, 2H), 8.77 (s, 2H), 8.59 (t,  $J = 8.1$  Hz, 1H), 8.21 (d,  $J = 8.1$  Hz, 2H), 8.05 (s, 2H), 4.02 (s, 6H). The data is in accordance with the published results<sup>[3]</sup>.

## Synthesis of CNC-Et

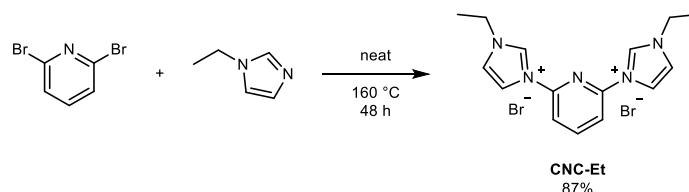

The title compound was synthesized using the identical methodology as CNC-*Pr*. The reaction of 1-ethyl-1H-imidazole (2.9 g, 30 mmol) and 2,6-dibromopyridine (2.96 g, 12.5 mmol) afforded CNC-Et as a white solid (4.6 g, 87%). [See spectrum](#)

$^1\text{H}$  NMR (400 MHz,  $\text{DMSO-}d_6$ )  $\delta$  10.59 (s, 2H), 8.84 (s, 2H), 8.62 (t,  $J = 8.0$  Hz, 1H), 8.27 (d,  $J = 8.1$  Hz, 2H), 8.20 (s, 2H), 4.40 (q,  $J = 7.2$  Hz, 4H), 1.57 (t,  $J = 7.2$  Hz, 6H). The data is in accordance with the published results<sup>[4]</sup>.

### Synthesis of CNC-<sup>t</sup>Bu

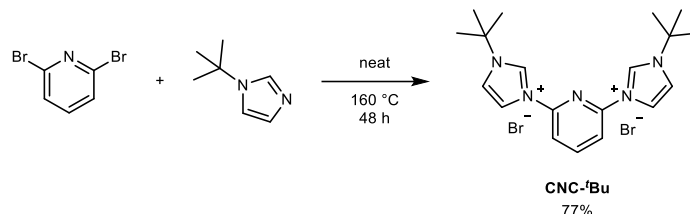

The title compound was synthesized using the identical methodology as CNC-<sup>i</sup>Pr. The reaction of 1-(tert-butyl)-1H-imidazole (3.7 g, 30 mmol) and 2,6-dibromopyridine (2.96 g, 12.5 mmol) afforded CNC-<sup>t</sup>Bu as a pale yellow solid (4.9 g, 77%). [See spectrum](#)

$^1\text{H}$  NMR (400 MHz,  $\text{DMSO-}d_6$ )  $\delta$  10.15 (s, 2H), 8.97 (s, 2H), 8.64 (t,  $J = 8.1$  Hz, 1H), 8.44-8.41 (m, 4H), 1.73 (s, 18H). The data is in accordance with the published results<sup>[1]</sup>.

### Synthesis of CNC-Mes

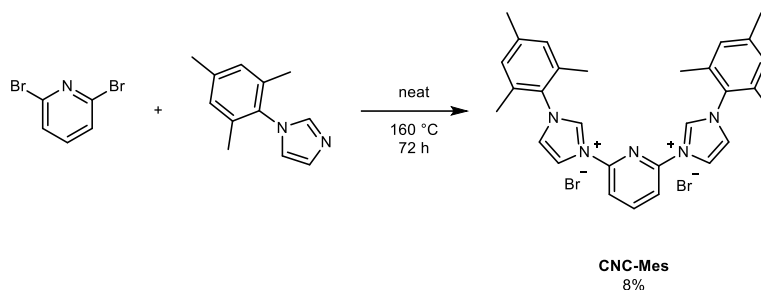

The title compound was synthesized using the identical methodology as CNC-<sup>i</sup>Pr. The reaction of 1-mesityl-1H-imidazole (1.86 g, 10 mmol) and 2,6-dibromopyridine (0.95 g, 4 mmol) afforded CNC-Mes as a pale yellow solid (0.2 g, 8%). [See spectrum](#)

$^1\text{H}$  NMR (400 MHz, Chloroform-*d*)  $\delta$  11.89 (s, 2H), 9.83 (s, 2H), 9.10 (d,  $J = 8.1$  Hz, 2H), 8.29 – 8.25 (m, 1H), 7.32 (s, 2H), 7.01 (s, 4H), 2.32 (s, 6H), 2.17 (s, 12H). The data is in accordance with the published results<sup>[5]</sup>.

## 1.3 Synthesis of substrate

### synthesis of N-(4-ethynylphenyl)acetamide 5a

4-Ethynylaniline (1.1 mL, 10 mmol) and acetic anhydride (1.2 mL, 13 mmol) were dissolved in dichloromethane (20 mL) and stirred at rt for 12 h. Flash chromatography on silica gel (eluent: petroleum ether/ethyl acetate = 100/1  $\rightarrow$  5/1) afforded the corresponding alkyne (1.4 g, 90%). [See spectrum](#)

$^1\text{H}$  NMR (400 MHz, Chloroform-*d*)  $\delta$  7.51-7.45 (m, 4H), 7.41 (br, 1H), 3.06 (s, 1H), 2.20 (s, 3H). The data is in accordance with the published results<sup>[6]</sup>.

### General procedure for synthesis of alkyne 6a, 16a, 22a, 23a, 24a, 26a<sup>[7]</sup>

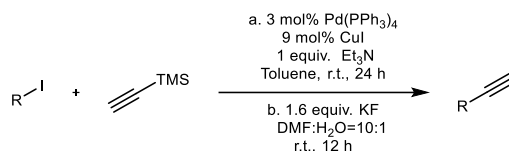

Pd(PPh<sub>3</sub>)<sub>4</sub> (347 mg, 0.3 mmol), CuI (171 mg, 0.9 mmol), iodide (10 mmol), toluene (25 mL), Et<sub>3</sub>N (1.4 mL, 10 mmol) and ethynyltrimethylsilane (2.1 mL, 15 mmol) were added into a flask under nitrogen atmosphere. The resulting solution was stirred for 24 h at rt. Flash chromatography on silica gel (eluent: petroleum ether/ethyl acetate =100/1→5/1) afforded the trimethylsilyl alkyne. The obtained alkyne was transfer into a flask with KF (926 mg, 16 mmol), DMF (100 mL), water (10 mL). The reaction mixture was stirred for 12 h at rt. and water (50 mL) was added. The resulting mixture was extracted with ethyl acetate (3×50 mL), the combined organic phase was washed with saturated solution of NaCl and dried with Na<sub>2</sub>SO<sub>4</sub>. Flash chromatography on silica gel (eluent: petroleum ether/ethyl acetate =100/1→5/1) afforded the corresponding alkyne.

#### synthesis of 4-ethynylphenyl acetate **6a**

The reaction of Pd(PPh<sub>3</sub>)<sub>4</sub> (140 mg, 0.12 mmol), CuI (69 mg, 0.36 mmol), 4-iodophenyl acetate (1.0 g, 4 mmol), toluene (10 mL), Et<sub>3</sub>N (0.6 mL, 4 mmol), ethynyltrimethylsilane (0.8 mL, 6 mmol) and KF (370 mg, 6.4 mmol) afforded **6a** as a white solid (0.6 g, 94%). [See spectrum](#)

<sup>1</sup>H NMR (600 MHz, Chloroform-*d*) δ 7.53 (d, *J* = 8.6 Hz, 2H), 7.08 (d, *J* = 8.6 Hz, 2H), 3.08 (s, 1H), 2.33 (s, 3H). The data is in accordance with the published results<sup>[7]</sup>.

#### synthesis of methyl 5-ethynyl-2-methoxybenzoate **16a**

The reaction of Pd(PPh<sub>3</sub>)<sub>4</sub> (525 mg, 0.45 mmol), CuI (259 mg, 1.35 mmol), methyl 5-iodo-2-methoxybenzoate (4.4 g, 15 mmol), toluene (38 mL), Et<sub>3</sub>N (2.1 mL, 15 mmol), ethynyltrimethylsilane (3.2 mL, 22.5 mmol) and KF (1.4 g, 24 mmol) afforded **16a** as a white solid (1.9 g, 72%). [See spectrum](#)

<sup>1</sup>H NMR (400 MHz, Chloroform-*d*) δ 7.96 (s, 1H), 7.60 (d, *J* = 8.4 Hz, 1H), 6.95 (d, *J* = 8.5 Hz, 1H), 3.94 (s, 3H), 3.91 (s, 3H), 3.04 (s, 1H). The data is in accordance with the published results<sup>[8]</sup>.

#### synthesis of 1-ethynyl-2-isopropylbenzene **22a**

The reaction of Pd(PPh<sub>3</sub>)<sub>4</sub> (3.5 g, 3 mmol), CuI (1.7 g, 9 mmol), 1-iodo-2-isopropylbenzen (24.6 g, 100 mmol), toluene (250 mL), Et<sub>3</sub>N (14 mL, 100 mmol), ethynyltrimethylsilane (21 mL, 150 mmol) and KF (9.3 g, 160 mmol) afforded **22a** as a colorless liquid (10.1 g, 71%). [See spectrum](#)

<sup>1</sup>H NMR (400 MHz, Chloroform-*d*) δ 7.51 (d, *J* = 7.6 Hz, 1H), 7.38 – 7.31 (m, 2H), 7.20 – 7.15 (m, 1H), 3.54 (hept, *J* = 6.9 Hz, 1H), 3.29 (s, 1H), 1.31 (d, *J* = 6.9 Hz, 6H). The data is in accordance with the published results<sup>[9]</sup>.

#### synthesis of 2-ethynyl-1-fluoro-3-methoxybenzene **23a**

The reaction of Pd(PPh<sub>3</sub>)<sub>4</sub> (266 mg, 0.23 mmol), CuI (129 mg, 0.68 mmol), 1-fluoro-2-iodo-3-methoxybenzene (1.9 g, 7.5 mmol), toluene (20 mL), Et<sub>3</sub>N (1.1 mL, 7.5 mmol), ethynyltrimethylsilane (1.5 mL, 11 mmol) and KF (698 mg, 12 mmol) afforded **23a** as a colorless liquid (0.7 g, 62%). [See spectrum](#)

<sup>1</sup>H NMR (600 MHz, Chloroform-*d*) δ 7.31 – 7.27 (m, 1H), 6.75 (t, *J* = 8.5 Hz, 1H), 6.71 (d, *J* = 8.5 Hz, 1H), 3.94 (s, 3H), 3.55 (s, 1H). The data is in accordance with the published results<sup>[10]</sup>.

#### synthesis of 2-ethynyl-1,3-dimethoxybenzene **24a**

The reaction of Pd(PPh<sub>3</sub>)<sub>4</sub> (150 mg, 0.13 mmol), CuI (72 mg, 0.38 mmol), 2-iodo-1,3-dimethoxybenzene (1.1 g, 4.2 mmol), toluene (10 mL), Et<sub>3</sub>N (0.6 mL, 4.2 mmol),

ethynyltrimethylsilane (0.9 mL, 6.3 mmol) and KF (390 mg, 6.7 mmol) afforded **24a** as a white solid (0.3 g, 31%). [See spectrum](#)

<sup>1</sup>H NMR (400 MHz, Chloroform-*d*) δ 7.25 (t, *J* = 8.4 Hz, 1H), 6.54 (d, *J* = 8.4 Hz, 2H), 3.89 (s, 6H), 3.56 (s, 1H). The data is in accordance with the published results<sup>[7]</sup>.

#### synthesis of 2-ethynyl-1,3-diisopropylbenzene 26a

The reaction of Pd(PPh<sub>3</sub>)<sub>4</sub> (229 mg, 0.2 mmol), CuI (112 mg, 0.59 mmol), 2-iodo-1,3-diisopropylbenzene (1.9 g, 6.6 mmol), Et<sub>3</sub>N (16 mL, 115 mmol), ethynyltrimethylsilane (1.4 mL, 10 mmol) was heated at 90 °C and then react with KF (636 mg, 11 mmol) afforded **23a** as a colorless liquid (460 mg, 38%). [See spectrum](#)

<sup>1</sup>H NMR (400 MHz, Chloroform-*d*) δ 7.33 (t, *J* = 7.8 Hz, 1H), 7.17 (d, *J* = 7.8 Hz, 2H), 3.61 (hept, *J* = 6.9 Hz, 2H), 3.51 (s, 1H), 1.31 (d, *J* = 6.9 Hz, 12H). The data is in accordance with the published results<sup>[11]</sup>.

#### synthesis of (E)-but-1-en-3-yn-1-ylbenzene 41a

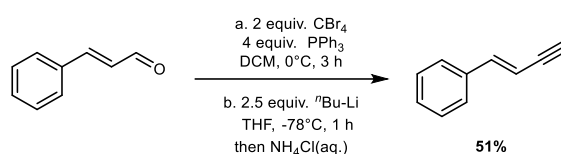

Under a nitrogen atmosphere, carbon tetrabromide (3.8 g, 11.6 mmol) and dichloromethane (10 mL) was added to a solution of triphenylphosphine (6.1 g, 23.2 mmol) in dichloromethane (40 mL) at 0 °C. After 15 min of stirring, a solution of (E)-cinnamaldehyde (0.73 mL, 0.77 g, 5.8 mmol) in dichloromethane (10 mL) was added dropwise and the resulting mixture was stirred for 3 h. After adding petroleum ether (300 mL), the mixture was filtered through a pad of silica. The solvent was evaporated and the obtained crude dibromo compound was used without further purification.

The obtained dibromo compound was dissolved in dry THF (15 mL), and n-butyllithium (5.8 mL, 14.5 mmol, 2.5 M in THF) was added and stirred for 1 h at -78 °C. Saturated solution of NH<sub>4</sub>Cl (30 mL) was added and the resulting mixture was extracted with ethyl acetate (3×50 mL). The combined organic layer was evaporated and purified by flash chromatography on silica gel (eluent: petroleum ether) afforded **41a** as colorless liquid (0.38 g, 51%). [See spectrum](#)

<sup>1</sup>H NMR (400 MHz, Chloroform-*d*) δ 7.40-7.38 (m, 2H), 7.36 – 7.30 (m, 3H), 7.05 (d, *J* = 16.3 Hz, 1H), 6.14 (dd, *J* = 16.3, 2.3 Hz, 1H), 3.05 (s, 1H). The data is in accordance with the published results<sup>[12]</sup>.

#### synthesis of (E)-1-(but-1-en-3-yn-1-yl)-4-methylbenzene 42a

The title compound was synthesized using the identical methodology as **41a**. 4-methylcinnamaldehyde (0.8 g, 5.5 mmol) was treated with carbon tetrabromide (3.6 g, 11 mmol) and triphenylphosphine (5.8 g, 22 mmol) in dichloromethane (60 mL) at 0 °C. The dibromo compound was dissolved in dry THF (15 mL) and n-butyllithium (5.6 mL, 14 mmol, 2.5 M in THF) was added at -78 °C. Purification by flash chromatography on silica gel (eluent: petroleum ether) afforded **42a** as colorless liquid (0.4 g, 53%).

## 2. General procedure for condition optimization

In a nitrogen atmosphere, a vial was charged with cobalt salt, ligand, and base. The mixture was dissolved in solvent and stirred for 5 min, followed by adding HBpin. The mixture was further stirred for 5 min and phenylacetylene (0.2/0.4 mmol) was added rapidly. The resulting mixture was stirred for a certain time. The reaction was then quenched by adding water. Yield was obtained by

GC-MS using mesitylene as internal standard or by <sup>1</sup>H-NMR using methylene bromide as internal standard.

**Supplementary Table 1** Initial screening of ligand

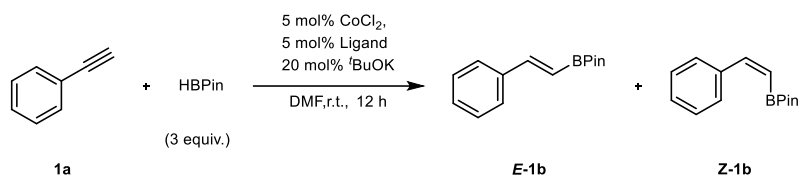

| Entry | Ligand            | Yield ( <i>E-1b</i> : <i>Z-1b</i> ) |
|-------|-------------------|-------------------------------------|
| 1     | CNC-H             | Trace                               |
| 2     | CNC-Me            | 71% (97:3)                          |
| 3     | CNC-Et            | 78% (64:36)                         |
| 4     | CNC- <i>i</i> -Pr | 99% (98:2)                          |
| 5     | CNC- <i>t</i> -Bu | 7%                                  |
| 6     | CNC-Mes           | Trace                               |

Conditions: 5 mol% CoCl<sub>2</sub>, 5 mol% Ligand, 20 mol% tBuOK, Solvent: DMF, [**1a**] = 0.2 M, 3 eq. HBpin, r.t.

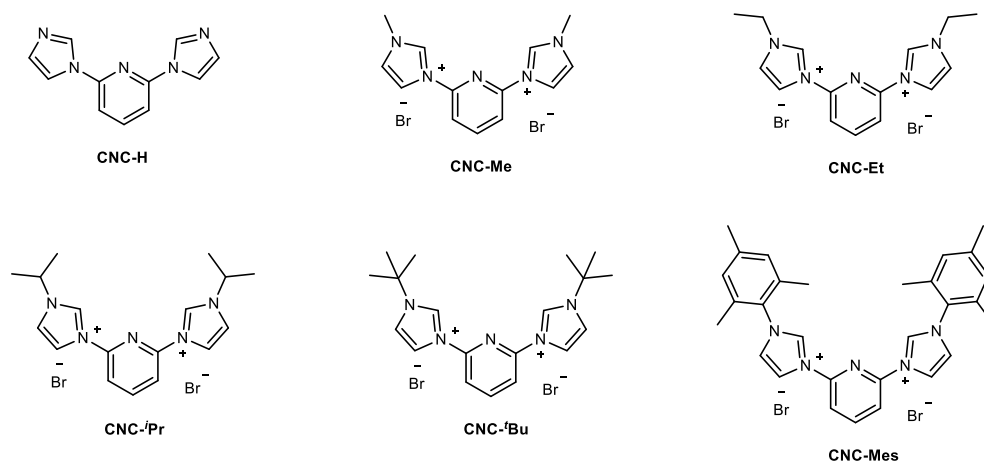

**Supplementary Table 2** Initial screening of base

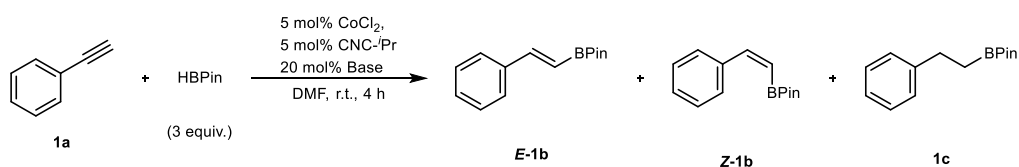

| Entry | Base                           | Yield ( <b>1c</b> : <i>E-1b</i> : <i>Z-1b</i> ) |
|-------|--------------------------------|-------------------------------------------------|
| 1     | <i>t</i> BuOK                  | >99% (3:62:35)                                  |
| 2     | K <sub>2</sub> CO <sub>3</sub> | 0                                               |
| 3     | <i>t</i> BuONa                 | 96% (3:88:9)                                    |
| 4     | EtONa                          | Trace                                           |
| 5     | MeONa                          | 0                                               |
| 6     | NaH                            | 0                                               |

Conditions: 5 mol% CoCl<sub>2</sub>, 5 mol% CNC-*i*-Pr, 20 mol% Base, Solvent: DMF, [**1a**] = 0.2 M, 3 eq.



HBpin, r.t.

**Supplementary Table 3** Initial screening of time

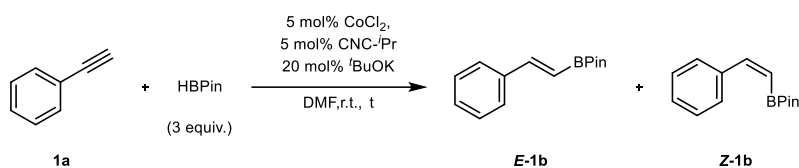

| Entry | <i>t</i> | Yield ( <i>E</i> -1b: <i>Z</i> -1b) |
|-------|----------|-------------------------------------|
| 1     | 8 h      | >99% (95:5)                         |
| 2     | 6 h      | 99% (95:5)                          |
| 3     | 30 min   | >99% (51:49)                        |
| 4     | 10 min   | >99% (4:96)                         |

Condition: 5 mol% CoCl<sub>2</sub>, 5 mol% CNC-<sup>*i*</sup>Pr, 20 mol% <sup>*t*</sup>BuOK, Solvent: DMF, [**1a**]=0.2 M, 3 eq. HBpin, r.t.

**Supplementary Table 4** Initial screening of equivalent of HBpin

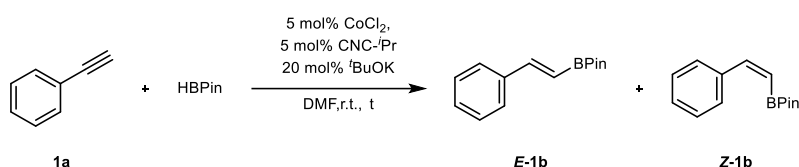

| Entry | HBpin   | <i>t</i> | Yield ( <i>E</i> -1b: <i>Z</i> -1b) |
|-------|---------|----------|-------------------------------------|
| 1     | 1.5 eq. | 10 min   | 65% (<1:99)                         |
| 2     | 1.5 eq. | 24 h     | 70% (<1:99)                         |
| 3     | 2 eq.   | 10 min   | 87% (<1:99)                         |
| 4     | 2 eq.   | 24 h     | 95% (66:34)                         |
| 5     | 3 eq.   | 10 min   | >99% (4:96)                         |
| 6     | 3 eq.   | 12 h     | 99% (98:2)                          |

Conditions: 5 mol% CoCl<sub>2</sub>, 5 mol% CNC-<sup>*i*</sup>Pr, 20 mol% <sup>*t*</sup>BuOK, Solvent: DMF, [**1a**]=0.2 M, HBpin, r.t.

**Supplementary Table 5** Screening of different ligand in low catalyst loading.

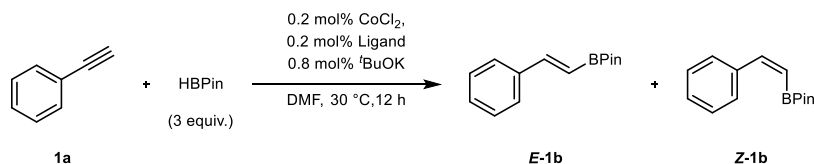

| Entry | Ligand                      | <i>E</i> -1b | <i>Z</i> -1b |
|-------|-----------------------------|--------------|--------------|
| 1     | CNC-H                       | Trace        | Trace        |
| 2     | CNC-Me                      | Trace        | Trace        |
| 3     | CNC-Et                      | Trace        | 5%           |
| 4     | CNC- <sup><i>i</i></sup> Pr | Trace        | 30%          |
| 5     | CNC- <sup><i>t</i></sup> Bu | Trace        | Trace        |

Conditions: 0.2 mol% CoCl<sub>2</sub>, 0.2 mol% ligand, 0.8 mol% base, solvent: DMF, [1a] = 0.2 M, 3 eq. HBpin, t = 12 h, 30 °C.

**Supplementary Table 6** Screening of reaction concentration

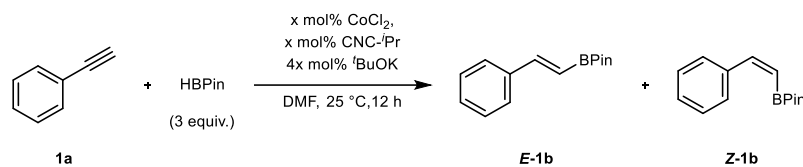

| Entry           | Metal                      | [1a]   | E-1b  | Z-1b  |
|-----------------|----------------------------|--------|-------|-------|
| 1               | 0.4 mol% CoCl <sub>2</sub> | 0.05 M | Trace | 7%    |
| 2               | 0.4 mol% CoCl <sub>2</sub> | 0.1 M  | 4%    | 96%   |
| 3               | 0.4 mol% CoCl <sub>2</sub> | 0.2 M  | 76%   | 24%   |
| 4               | 0.4 mol% CoCl <sub>2</sub> | 0.4 M  | 97%   | 4%    |
| 5               | 0.2 mol% CoCl <sub>2</sub> | 0.05 M | Trace | Trace |
| 6               | 0.2 mol% CoCl <sub>2</sub> | 0.1 M  | Trace | Trace |
| 7               | 0.2 mol% CoCl <sub>2</sub> | 0.2 M  | Trace | 8%    |
| 8               | 0.2 mol% CoCl <sub>2</sub> | 0.3 M  | Trace | 22%   |
| 9               | 0.2 mol% CoCl <sub>2</sub> | 0.4 M  | Trace | 44%   |
| 10 <sup>a</sup> | 0.5 mol% CoCl <sub>2</sub> | neat   | Trace | Trace |
| 11 <sup>b</sup> | 0.5 mol% CoCl <sub>2</sub> | neat   | Trace | Trace |

Conditions: x mol% CoCl<sub>2</sub>, x mol% CNC-Pr, 4x mol% tBuOK, Solvent: DMF, 3 eq. HBpin, t = 12 h, 25 °C. a: 200 µl of DMF to dissolve the Cat., 4 mmol scale; b: 200 µl of DMF to dissolve the Cat., 10 mmol scale.

**Supplementary Table 7** Screening of solvent

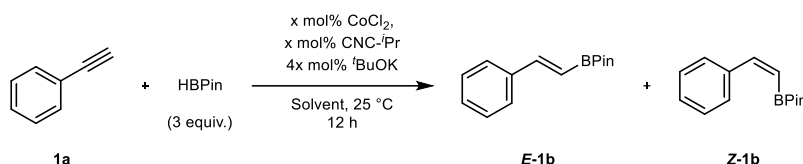

| Entry | Metal                      | Solvent | E-1b  | Z-1b  |
|-------|----------------------------|---------|-------|-------|
| 1     | 0.2 mol% CoCl <sub>2</sub> | DMA     | Trace | 9%    |
| 2     | 0.2 mol% CoCl <sub>2</sub> | NMP     | Trace | 6%    |
| 3     | 0.2 mol% CoCl <sub>2</sub> | DMSO    | Trace | Trace |
| 4     | 0.2 mol% CoCl <sub>2</sub> | DMF     | Trace | 44%   |
| 5     | 0.3 mol% CoCl <sub>2</sub> | DMA     | Trace | 17%   |
| 6     | 0.3 mol% CoCl <sub>2</sub> | NMP     | Trace | 13%   |
| 7     | 0.3 mol% CoCl <sub>2</sub> | DMSO    | Trace | Trace |
| 8     | 0.3 mol% CoCl <sub>2</sub> | DMF     | Trace | 58%   |

Conditions: x mol% CoCl<sub>2</sub>, x mol% CNC-Pr, 4x mol% tBuOK, Solvent, [1a] = 0.4 M, 3 eq. HBpin, t = 12 h, 25 °C.

**Supplementary Table 8** Screening of Metal Precursor

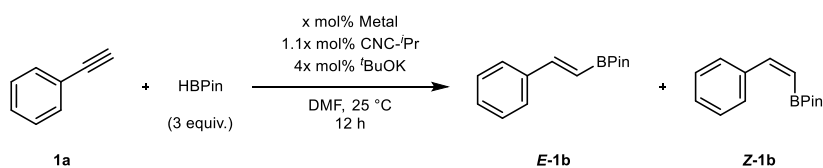

| Entry | Metal                           | <i>E</i> -1b | <i>Z</i> -1b |
|-------|---------------------------------|--------------|--------------|
| 1     | 0.3 mol% CoCl <sub>2</sub>      | Trace        | 91%          |
| 2     | 0.2 mol% CoCl <sub>2</sub>      | Trace        | 27%          |
| 3     | 0.4 mol% CoBr <sub>2</sub>      | Trace        | 48%          |
| 4     | 0.3 mol% CoBr <sub>2</sub>      | Trace        | 35%          |
| 5     | 0.3 mol% Co(acac) <sub>2</sub>  | 52%          | 46%          |
| 6     | 0.2 mol% Co(acac) <sub>2</sub>  | 48%          | 50%          |
| 7     | 0.1 mol% Co(acac) <sub>2</sub>  | Trace        | 50%          |
| 8     | 0.05 mol% Co(acac) <sub>2</sub> | Trace        | Trace        |
| 9     | 0.3 mol% Co(OAc) <sub>2</sub>   | 50%          | 52%          |
| 10    | 0.2 mol% Co(OAc) <sub>2</sub>   | 14%          | 83%          |
| 11    | 0.1 mol% Co(OAc) <sub>2</sub>   | Trace        | 45%          |
| 12    | 0.05 mol% Co(OAc) <sub>2</sub>  | Trace        | 12%          |

Conditions:  $x$  mol% Metal,  $1.1x$  mol% CNC-<sup>*i*</sup>Pr,  $4x$  mol% <sup>*t*</sup>BuOK, Solvent: DMF, [**1a**] = 0.4 M, 3 eq. HBpin,  $t$  = 12 h, 25 °C.

**Supplementary Table 9** Screening of equivalent of Ligand

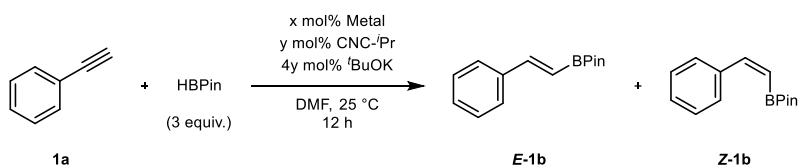

| Entry | Metal                          | Ligand (eq. of Metal) | <i>E</i> -1b | <i>Z</i> -1b |
|-------|--------------------------------|-----------------------|--------------|--------------|
| 1     | 0.2 mol% Co(acac) <sub>2</sub> | 0.5 eq.               | Trace        | 22%          |
| 2     | 0.2 mol% Co(acac) <sub>2</sub> | 1 eq.                 | Trace        | 45%          |
| 3     | 0.2 mol% Co(acac) <sub>2</sub> | 1.3 eq.               | 54%          | 46%          |
| 4     | 0.2 mol% Co(acac) <sub>2</sub> | 1.4 eq.               | 86%          | 8%           |
| 5     | 0.2 mol% Co(acac) <sub>2</sub> | 1.5 eq.               | 71%          | 26%          |
| 6     | 0.2 mol% Co(acac) <sub>2</sub> | 1.6 eq.               | 54%          | 38%          |
| 7     | 0.2 mol% Co(acac) <sub>2</sub> | 2 eq.                 | 43%          | 56%          |
| 8     | 0.1 mol% Co(acac) <sub>2</sub> | 0.5 eq.               | Trace        | 6%           |
| 9     | 0.1 mol% Co(acac) <sub>2</sub> | 1 eq.                 | Trace        | 8%           |
| 10    | 0.1 mol% Co(acac) <sub>2</sub> | 1.3 eq.               | 8%           | 78%          |
| 11    | 0.1 mol% Co(acac) <sub>2</sub> | 1.4 eq.               | 5%           | 89%          |
| 12    | 0.1 mol% Co(acac) <sub>2</sub> | 1.5 eq.               | 4%           | 48%          |
| 13    | 0.1 mol% Co(acac) <sub>2</sub> | 1.6 eq.               | 6%           | 35%          |

14                      0.1 mol% Co(acac)<sub>2</sub>                      2 eq.                      Trace                      26%

Conditions: x mol% Co(acac)<sub>2</sub>, y mol% **CNC-iPr**, 4y mol% **<sup>t</sup>BuOK**, Solvent: DMF, [1a] = 0.4 M, 3 eq. HBpin, t = 12 h, 25 °C.

**Supplementary Table 10** Screening of concentration using Co(acac)<sub>2</sub>

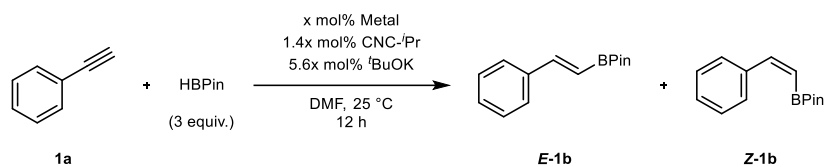

| Entry | Metal                           | [1a]  | <i>E</i> -1b | <i>Z</i> -1b |
|-------|---------------------------------|-------|--------------|--------------|
| 1     | 0.1 mol% Co(acac) <sub>2</sub>  | 0.8 M | 5%           | 95%          |
| 2     | 0.1 mol% Co(acac) <sub>2</sub>  | 1.0 M | Trace        | 93%          |
| 3     | 0.1 mol% Co(acac) <sub>2</sub>  | 1.6 M | Trace        | 64%          |
| 4     | 0.05 mol% Co(acac) <sub>2</sub> | 0.8 M | Trace        | 16%          |
| 5     | 0.05 mol% Co(acac) <sub>2</sub> | 1.6 M | Trace        | 14%          |

Conditions: x mol% Co(acac)<sub>2</sub>, 1.4x mol% **CNC-<sup>i</sup>Pr**, 5.6x mol% **<sup>t</sup>BuOK**, Solvent: DMF, 3 eq. HBpin, t = 12 h, 25 °C.

**Supplementary Table 11** Screening of equivalent of Base

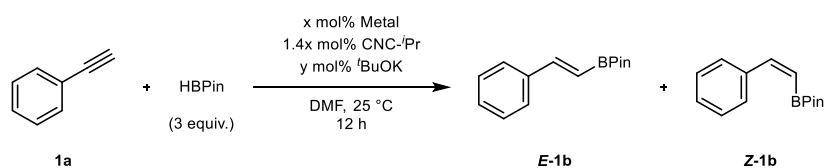

| Entry | Metal                           | <sup>t</sup> BuOK (eq. of Ligand) | <i>E</i> -1b | <i>Z</i> -1b |
|-------|---------------------------------|-----------------------------------|--------------|--------------|
| 1     | 0.05 mol% Co(acac) <sub>2</sub> | 4 eq.                             | Trace        | 16%          |
| 2     | 0.05 mol% Co(acac) <sub>2</sub> | 3 eq.                             | Trace        | Trace        |
| 3     | 0.05 mol% Co(acac) <sub>2</sub> | 2.5 eq.                           | Trace        | Trace        |
| 4     | 0.05 mol% Co(acac) <sub>2</sub> | 2 eq.                             | Trace        | Trace        |
| 5     | 0.08 mol% Co(acac) <sub>2</sub> | 4 eq.                             | Trace        | 48%          |
| 6     | 0.08 mol% Co(acac) <sub>2</sub> | 3 eq.                             | Trace        | 36%          |
| 7     | 0.08 mol% Co(acac) <sub>2</sub> | 2.5 eq.                           | Trace        | 15%          |
| 8     | 0.08 mol% Co(acac) <sub>2</sub> | 2 eq.                             | Trace        | Trace        |

Conditions: x mol% Co(acac)<sub>2</sub>, 1.4x mol% **CNC-iPr**, y mol% **<sup>t</sup>BuOK**, Solvent: DMF, [1a] = 0.8 M, 3 eq. HBpin, t = 12 h, 25 °C.

**Supplementary Table 12** Screening of other boranes

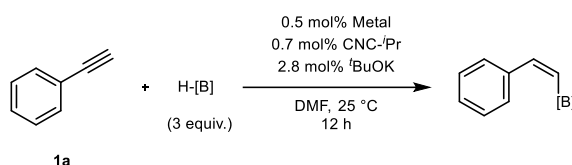

| Entry | H-[B] | Yield |
|-------|-------|-------|
| 1     | HBCat | 0     |

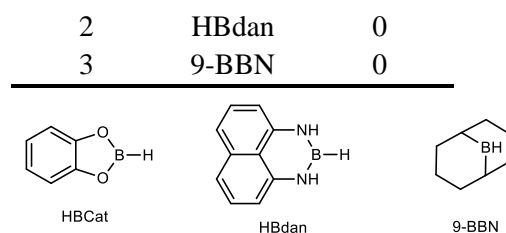

### 3. Substrate investigation and characterization

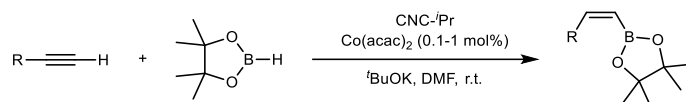

**General procedure A:** In a nitrogen atmosphere, a vial was charged with  $\text{Co}(\text{acac})_2$  (4.1 mg, 0.016 mmol), CNC-*Pr* (10.2 mg, 0.022 mmol),  $t\text{BuOK}$  (10.1 mg, 0.09 mmol) in dry DMF (2 mL) and was stirred for 5 mins. The freshly prepared stock solution of the *in situ* prepared active catalyst ( $[\text{Co}] = 8.0 \text{ mM}$  in DMF) was added via a micro-syringe (50-500  $\mu\text{L}$ , 0.0004-0.004 mmol, 0.1-1 mol%, as noted) to a vial charged with HBpin (75  $\mu\text{L}$ , 0.52 mmol, 1.3 equiv., unless otherwise noted) and DMF([alkyne]=0.8 M). The mixture was stirred for 5 mins. Alkyne (0.4 mmol, unless otherwise noted) was added rapidly and the resulting mixture was stirred for 12 hours. The reaction was then quenched by adding water. 20 mL EtOAc was added and the organic phase was washed with 10 mL brine twice to remove most of DMF. Pure product was isolated by column chromatography over silica gel deactivated with 2%  $\text{NEt}_3$  in petroleum ether using petroleum/EtOAc as the eluent.

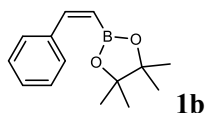

(*Z*)-4,4,5,5-tetramethyl-2-styryl-1,3,2-dioxaborolane (**1b**): The title compound was prepared following general procedure A (0.1 mol% of  $[\text{Co}]$ , 0.8 mmol scale). Dibromomethane (DBM) was added as internal standard and NMR yield (>99%) was obtained. Purification by flash column chromatography on silica gel (eluent: petroleum ether  $\rightarrow$  petroleum ether/EtOAc = 20/1) afforded the product as a colorless oil in 90% yield (166.5 mg, Z:E = 98:2). [See spectrum](#)

The title compound can also be synthesized according to general procedure A (0.5 mol% of  $[\text{Co}]$ ), resulting in a >99% NMR yield (Z:E=98:2) when dibromomethane was used as the internal standard.  $^1\text{H NMR}$  (400 MHz, Chloroform-*d*)  $\delta$  7.53 (d,  $J = 6.7 \text{ Hz}$ , 2H), 7.33 – 7.26 (m, 3H), 7.22 (d,  $J = 15.0 \text{ Hz}$ , 1H), 5.59 (d,  $J = 14.9 \text{ Hz}$ , 1H), 1.29 (s, 12H).

$^{11}\text{B NMR}$  (128 MHz,  $\text{CDCl}_3$ )  $\delta$  29.4.

All recorded spectroscopic data matched those previously reported in the literature<sup>[13]</sup>.

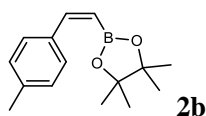

(*Z*)-4,4,5,5-tetramethyl-2-(4-methylstyryl)-1,3,2-dioxaborolane (**2b**): The title compound was prepared following general procedure A (1 mol% of  $[\text{Co}]$ ). DBM was added as internal standard and NMR yield (93%) was obtained. Purification by flash column chromatography on silica gel (eluent:

petroleumether→ petroleumether/EtOAc =20/1) afforded the product as a pale-yellow oil in 90% yield (87.8 mg, Z:E = 99:1). [See spectrum](#)

<sup>1</sup>H NMR (400 MHz, Chloroform-*d*) δ 7.46 (d, *J* = 7.6 Hz, 2H), 7.19 (d, *J* = 14.9 Hz, 1H), 7.12 (d, *J* = 7.7 Hz, 2H), 5.53 (d, *J* = 14.9 Hz, 1H), 2.35 (s, 3H), 1.31 (s, 12H).

All recorded spectroscopic data matched those previously reported in the literature<sup>[13]</sup>.

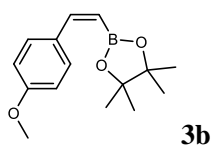

(*Z*)-2-(4-methoxystyryl)-4,4,5,5-tetramethyl-1,3,2-dioxaborolane (**3b**): The title compound was prepared following general procedure A (0.1 mol% of [Co]), the reaction mixture was stirred for 3 hours. Purification by flash column chromatography on silica gel (eluent: petroleumether→ petroleumether/EtOAc =20/1) afforded the product as a colorless oil in 99% yield (99.9 mg, Z:E=98:2). [See spectrum](#)

The title compound can also be synthesized according to general procedure A (0.5 mol% of [Co]), resulting in a >99% NMR yield (Z:E=97:3) when dibromomethane was used as the internal standard. Reaction with low catalyst loading: In a nitrogen atmosphere, a vial was charged with Co(acac)<sub>2</sub> (4.1 mg, 0.016 mmol), CNC-<sup>*i*</sup>Pr (10.2 mg, 0.022 mmol), <sup>*t*</sup>BuOK (10.1 mg, 0.09 mmol) in dry DMF (2 mL) and was stirred for 5 mins. The freshly prepared stock solution of the *in situ* prepared active catalyst ([Co] = 8.0 mM in DMF) was added via a micro-syringe (0.05 mol%) to a vial charged with HBpin (1.3 equiv.) and DMF (0.5 mL, [alkyne]=3.2 M). The mixture was stirred for 5 mins. Alkyne (1.6 mmol) was added rapidly and the resulting mixture was stirred for 24 or 48 hours. The resulting mixture was diluted with EtOAc and sent for GC-MS analysis, leading to the title compound with a 77% GC-MS yield (Z:E>99:1, 24 h) and 84% GC-MS yield (Z:E>99:1, 48 h), respectively.

<sup>1</sup>H NMR (400 MHz, Chloroform-*d*) δ 7.57 (d, *J* = 8.7 Hz, 2H), 7.18 (d, *J* = 14.9 Hz, 1H), 6.86 (d, *J* = 8.8 Hz, 2H), 5.48 (d, *J* = 14.9 Hz, 1H), 3.84 (s, 3H), 1.33 (s, 12H).

<sup>11</sup>B NMR (193 MHz, CDCl<sub>3</sub>) δ 30.4.

All recorded spectroscopic data matched those previously reported in the literature<sup>[13]</sup>.

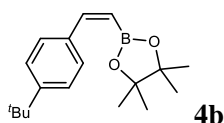

(*Z*)-2-(4-(tert-butyl)styryl)-4,4,5,5-tetramethyl-1,3,2-dioxaborolane (**4b**): The title compound was prepared following general procedure A (1 mol% of [Co]). Purification by flash column chromatography on silica gel (eluent: petroleumether→ petroleumether/EtOAc =20/1) afforded the product as a pale-yellow oil in 82% yield (91.8 mg, Z:E=99:1). [See spectrum](#)

The title compound can also be synthesized according to general procedure A (0.5 mol% of [Co], ), resulting in a 86% NMR yield, Z:E=98:2) when dibromomethane was used as the internal standard.

<sup>1</sup>H NMR (400 MHz, Chloroform-*d*) δ 7.54 (d, *J* = 8.1 Hz, 2H), 7.36 (d, *J* = 8.2 Hz, 2H), 7.20 (d, *J* = 14.9 Hz, 1H), 5.55 (d, *J* = 14.9 Hz, 1H), 1.34 (s, 9H), 1.33 (s, 12H).

All recorded spectroscopic data matched those previously reported in the literature<sup>[13]</sup>.

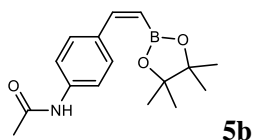

**5b**

(Z)-N-(4-(2-(4,4,5,5-tetramethyl-1,3,2-dioxaborolan-2-yl)vinyl)phenyl)acetamide (**5b**): The title compound was prepared following general procedure A (0.5 mol% of [Co]). **5a** (63.7 mg, 0.4 mmol) was added into a vial with Co(acac)<sub>2</sub> (0.5 mg, 0.002 mmol), CNC-<sup>*i*</sup>Pr (1.3 mg, 0.0028 mmol), <sup>*t*</sup>BuOK (1.3 mg, 0.0112 mmol), HBpin (75 μL, 0.52 mmol, 1.3 equiv.) and DMF (0.5 mL). The reaction mixture was stirred for 10 minutes. DBM was added as internal standard and NMR yield (>99%) was obtained. Purification by flash column chromatography on silica gel (eluent: petroleum ether → petroleum ether/EtOAc = 10/1) afforded the product as a white solid in 87% yield (99.7 mg, Z:E=97:3). [See spectrum](#)

<sup>1</sup>H NMR (400 MHz, Chloroform-*d*) δ 7.53 (d, *J* = 8.6 Hz, 2H), 7.45 (d, *J* = 8.6 Hz, 2H), 7.30 (s, 1H), 7.14 (d, *J* = 14.9 Hz, 1H), 5.52 (d, *J* = 14.9 Hz, 1H), 2.17 (s, 3H), 1.29 (s, 12H).

<sup>13</sup>C NMR (101 MHz, CDCl<sub>3</sub>) δ 168.2, 147.7, 137.8, 134.5, 129.6, 119.0, 83.6, 24.8, 24.8.

<sup>11</sup>B NMR (128 MHz, CDCl<sub>3</sub>) δ 29.5.

HRMS (ESI+) *m/z* calculated for C<sub>16</sub>H<sub>22</sub>BNO<sub>3</sub>Na<sup>+</sup> ([M+Na]<sup>+</sup>) 310.1585; found 310.1582.

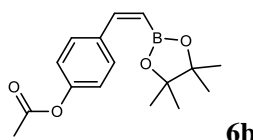

**6b**

(Z)-4-(2-(4,4,5,5-tetramethyl-1,3,2-dioxaborolan-2-yl)vinyl)phenyl acetate (**6b**): The title compound was prepared following general procedure A (0.5 mol% of [Co]). **6a** (64.1 mg, 0.4 mmol) was added into a vial with Co(acac)<sub>2</sub> (0.5 mg, 0.002 mmol), CNC-<sup>*i*</sup>Pr (1.3 mg, 0.0028 mmol), <sup>*t*</sup>BuOK (1.3 mg, 0.0112 mmol), HBpin (75 μL, 0.52 mmol, 1.3 equiv.) and DMF (0.5 mL). The reaction mixture was stirred for 10 minutes. Purification by flash column chromatography on silica gel (eluent: petroleum ether → petroleum ether/EtOAc = 10/1) afforded the product as a white solid in 88% yield (101.6 mg, Z:E>99:1). [See spectrum](#)

<sup>1</sup>H NMR (400 MHz, Chloroform-*d*) δ 7.58 (d, *J* = 8.5 Hz, 2H), 7.18 (d, *J* = 14.9 Hz, 1H), 7.03 (d, *J* = 8.6 Hz, 2H), 5.58 (d, *J* = 14.9 Hz, 1H), 2.29 (s, 3H), 1.28 (s, 12H).

<sup>13</sup>C NMR (101 MHz, CDCl<sub>3</sub>) δ 169.4, 150.4, 147.3, 136.2, 129.8, 121.0, 83.6, 24.8, 21.2.

<sup>11</sup>B NMR (193 MHz, CDCl<sub>3</sub>) δ 30.2.

HRMS (ESI+) *m/z* calculated for C<sub>16</sub>H<sub>22</sub>BO<sub>4</sub><sup>+</sup> ([M+H]<sup>+</sup>) 289.1606; found 289.1603.

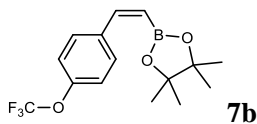

**7b**

(Z)-4,4,5,5-tetramethyl-2-(4-(trifluoromethoxy)styryl)-1,3,2-dioxaborolane (**7b**): The title compound was prepared following general procedure A (1 mol% of [Co]). **7a** (74.5 mg, 0.4 mmol) was added into a vial with Co(acac)<sub>2</sub> (1.0 mg, 0.004 mmol), CNC-<sup>*i*</sup>Pr (2.6 mg, 0.0056 mmol), <sup>*t*</sup>BuOK (2.5 mg, 0.0224 mmol), HBpin (75 μL, 0.52 mmol, 1.3 equiv.) and DMF (0.5 mL). The reaction mixture was stirred for 12 hours. Purification by flash column chromatography on silica gel (eluent: petroleum ether → petroleum ether/EtOAc = 20/1) afforded the product as a yellow oil in 83% yield (104.3 mg, Z:E>99:1). [See spectrum](#)

The title compound can also be synthesized according to general procedure A (0.5 mol% of [Co] ), resulting in a 70% NMR yield (Z:E=96:4) when dibromomethane was used as the internal standard. <sup>1</sup>H NMR (600 MHz, Chloroform-*d*) δ 7.58 (d, *J* = 8.5 Hz, 2H), 7.18 (d, *J* = 14.9 Hz, 1H), 7.15 (d, *J* = 8.3 Hz, 2H), 5.64 (d, *J* = 14.9 Hz, 1H), 1.29 (s, 12H).

<sup>19</sup>F NMR (565 MHz, CDCl<sub>3</sub>) δ -57.8.

<sup>13</sup>C NMR (151 MHz, CDCl<sub>3</sub>) δ 148.8, 146.7, 137.1, 130.1, 123.0, 121.3, 120.3, 119.6, 117.9, 83.6, 24.7.

<sup>11</sup>B NMR (193 MHz, CDCl<sub>3</sub>) δ 30.1.

HRMS (APCI+) *m/z* calculated for C<sub>15</sub>H<sub>19</sub>BF<sub>3</sub>O<sub>3</sub>+ ([M+H]<sup>+</sup>) 315.1374; found 315.1366.

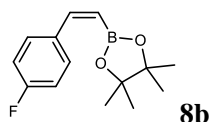

(*Z*)-2-(4-fluorostyryl)-4,4,5,5-tetramethyl-1,3,2-dioxaborolane (**8b**): The title compound was prepared following general procedure A (1 mol% of [Co]), the reaction mixture was stirred for 10 minutes. DBM was added as internal standard and NMR yield (81%) was obtained. Purification by flash column chromatography on silica gel (eluent: petroleumether → petroleumether/EtOAc = 20/1) afforded the product as a colorless oil in 67% yield (76.6 mg, Z:E=96:4). [See spectrum](#)

<sup>1</sup>H NMR (400 MHz, Chloroform-*d*) δ 7.60 – 7.49 (m, 2H), 7.17 (d, *J* = 14.8 Hz, 1H), 6.99 (t, *J* = 8.8 Hz, 2H), 5.56 (d, *J* = 14.9 Hz, 1H), 1.29 (s, 12H).

<sup>13</sup>C NMR (101 MHz, CDCl<sub>3</sub>) δ 163.8, 161.4, 147.2, 134.6, 134.6, 130.5, 130.4, 114.9, 114.7, 83.5, 24.8.

<sup>11</sup>B NMR (128 MHz, CDCl<sub>3</sub>) δ 30.3.

<sup>19</sup>F NMR (377 MHz, CDCl<sub>3</sub>) δ -113.9.

All recorded spectroscopic data matched those previously reported in the literature<sup>[13]</sup>.

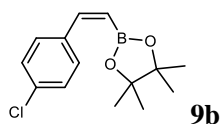

(*Z*)-2-(4-chlorostyryl)-4,4,5,5-tetramethyl-1,3,2-dioxaborolane (**9b**): The title compound was prepared following general procedure A (1 mol% of [Co], 2.5 eq. HBpin, 0.2 mmol scale), the reaction mixture was stirred for 12 hours. DBM was added as internal standard and NMR yield (84%) was obtained. Purification by flash column chromatography on silica gel (eluent: petroleumether → petroleumether/EtOAc = 20/1) afforded the product as a colorless oil in 74% yield (40.3 mg, Z:E=97:3). [See spectrum](#)

The title compound can also be synthesized according to general procedure A (0.5 mol% of [Co] ), resulting in a 73% NMR yield (Z:E=98:2) when dibromomethane was used as the internal standard. <sup>1</sup>H NMR (400 MHz, Chloroform-*d*) δ 7.41 (d, *J* = 8.5 Hz, 2H), 7.20 (d, *J* = 8.6 Hz, 2H), 7.07 (d, *J* = 14.9 Hz, 1H), 5.54 (d, *J* = 14.9 Hz, 1H), 1.21 (s, 12H).

All recorded spectroscopic data matched those previously reported in the literature<sup>[13]</sup>.

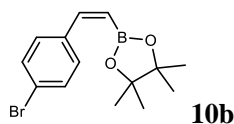



(Z)-2-(4-bromostyryl)-4,4,5,5-tetramethyl-1,3,2-dioxaborolane (**10b**): The title compound was prepared following general procedure A (1 mol% of [Co], 2.5 eq. HBpin), the reaction mixture was stirred for 12 hours. DBM was added as internal standard and NMR yield (77%) was obtained. Purification by flash column chromatography on silica gel (eluent: petroleum ether → petroleum ether/EtOAc = 20/1) afforded the product as a pale yellow oil in 66% yield (82.3 mg, Z:E > 99:1). [See spectrum](#)

The title compound can also be synthesized according to general procedure A (0.5 mol% of [Co]), resulting in a 73% NMR yield (Z:E = 98:2) when dibromomethane was used as the internal standard. Purification by flash column chromatography on silica gel (eluent: petroleum ether → petroleum ether/EtOAc = 20/1) afforded the product as a pale yellow oil in 63% yield (78.1 mg, Z:E > 99:1).

<sup>1</sup>H NMR (400 MHz, Chloroform-*d*) δ 7.42 (s, 4H), 7.13 (d, *J* = 14.9 Hz, 1H), 5.62 (d, *J* = 14.9 Hz, 1H), 1.29 (s, 12H).

<sup>13</sup>C NMR (151 MHz, CDCl<sub>3</sub>) δ 147.0, 137.3, 131.1, 130.3, 122.1, 83.6, 24.8.

<sup>11</sup>B NMR (193 MHz, CDCl<sub>3</sub>) δ 30.2.

All recorded spectroscopic data matched those previously reported in the literature<sup>[14]</sup>.

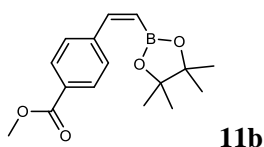

Methyl (Z)-4-(2-(4,4,5,5-tetramethyl-1,3,2-dioxaborolan-2-yl)vinyl)benzoate (**11b**): The title compound was prepared following general procedure A (1 mol% of [Co], 3 eq. HBpin). DBM was added as internal standard and NMR yield (86%) was obtained. Purification by flash column chromatography on silica gel (eluent: petroleum ether → petroleum ether/EtOAc = 10/1) afforded the product as a white solid in 76% yield (87.6 mg, Z:E > 99:1). [See spectrum](#)

<sup>1</sup>H NMR (600 MHz, Chloroform-*d*) δ 7.98 (d, *J* = 7.6 Hz, 2H), 7.58 (d, *J* = 7.7 Hz, 2H), 7.23 (d, *J* = 14.9 Hz, 1H), 5.72 (d, *J* = 14.9 Hz, 1H), 3.91 (s, 3H), 1.29 (s, 12H).

<sup>13</sup>C NMR (151 MHz, CDCl<sub>3</sub>) δ 167.0, 146.9, 142.9, 129.3, 129.3, 128.5, 83.7, 52.1, 24.8.

<sup>11</sup>B NMR (193 MHz, CDCl<sub>3</sub>) δ 30.3.

All recorded spectroscopic data matched those previously reported in the literature<sup>[13]</sup>.

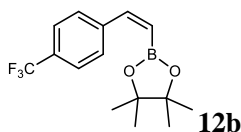

(Z)-4,4,5,5-tetramethyl-2-(4-(trifluoromethyl)styryl)-1,3,2-dioxaborolane (**12b**): The title compound was prepared following general procedure A (1 mol% of [Co], 3 eq. HBpin), the reaction mixture was stirred with 10 mol% diphenylacetylene for 12 hours. DBM was added as internal standard and NMR yield (42%) was obtained. Purification by flash column chromatography on silica gel (eluent: petroleum ether → petroleum ether/EtOAc = 20/1) afforded the product as a colorless oil in 36% yield (42.9 mg, Z:E = 99:1). [See spectrum](#)

The title compound can also be synthesized according to general procedure A (0.5 mol% of [Co]), resulting in a 16% NMR yield (Z:E = 88:12) when dibromomethane was used as the internal standard. When conditions were modified to 1.0 mol% of [Co], an NMR yield of 50% with a Z:E ratio of

83:17 was obtained. Furthermore, by employing a condition consisting of 1.0 mol% of [Co], 3 eq. HBpin, an NMR yield of 80% with a Z:E ratio of 75:25 was achieved.

**<sup>1</sup>H NMR** (600 MHz, Chloroform-*d*)  $\delta$  7.63 (d, *J* = 8.1 Hz, 2H), 7.58 – 7.53 (d, *J* = 8.2 Hz, 2H), 7.22 (d, *J* = 14.8 Hz, 1H), 5.73 (d, *J* = 14.9 Hz, 1H), 1.29 (s, 12H).

**<sup>13</sup>C NMR** (151 MHz, CDCl<sub>3</sub>)  $\delta$  146.6, 141.8, 129.8, 129.6, 128.8, 124.9, 124.9, 124.9, 124.8, 83.7, 24.8.

**<sup>11</sup>B NMR** (193 MHz, CDCl<sub>3</sub>)  $\delta$  30.1.

**<sup>19</sup>F NMR** (565 MHz, CDCl<sub>3</sub>)  $\delta$  -62.5.

All recorded spectroscopic data matched those previously reported in the literature<sup>[14]</sup>.

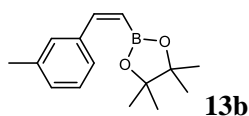

(*Z*)-4,4,5,5-tetramethyl-2-(3-methylstyryl)-1,3,2-dioxaborolane (**13b**): The title compound was prepared following general procedure A (0.2 mol% of [Co]). DBM was added as internal standard and NMR yield (99%) was obtained. Purification by flash column chromatography on silica gel (eluent: petroleumether → petroleumether/EtOAc = 20/1) afforded the product as a colorless oil in 80% yield (78.5 mg, Z:E > 99:1). [See spectrum](#)

The title compound can also be synthesized according to general procedure A (0.5 mol% of [Co]), resulting in a >99% NMR yield (Z:E > 99:1) when dibromomethane was used as the internal standard.

**<sup>1</sup>H NMR** (400 MHz, Chloroform-*d*)  $\delta$  7.31 (s, 1H), 7.22 (d, *J* = 7.4 Hz, 1H), 7.15–7.06 (m, 2H), 7.04 – 6.96 (m, 1H), 5.49 (d, *J* = 14.8 Hz, 1H), 2.26 (s, 3H), 1.21 (s, 12H).

**<sup>13</sup>C NMR** (151 MHz, CDCl<sub>3</sub>)  $\delta$  148.2, 138.4, 137.4, 129.1, 128.8, 127.9, 125.9, 83.4, 24.8, 21.3.

**<sup>11</sup>B NMR** (193 MHz, CDCl<sub>3</sub>)  $\delta$  30.4.

All recorded spectroscopic data matched those previously reported in the literature<sup>[14]</sup>.

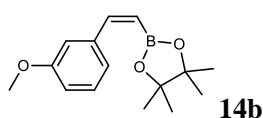

(*Z*)-2-(3-methoxystyryl)-4,4,5,5-tetramethyl-1,3,2-dioxaborolane (**14b**): The title compound was prepared following general procedure A (1 mol% of [Co], 2 eq. HBpin). Purification by flash column chromatography on silica gel (eluent: petroleumether → petroleumether/EtOAc = 20/1) afforded the product as a pale yellow oil in 91% yield (97.1 mg, Z:E = 97:3). [See spectrum](#)

The title compound can also be synthesized according to general procedure A (0.5 mol% of [Co]), resulting in a 56% NMR yield (Z:E = 95:5) when dibromomethane was used as the internal standard.

**<sup>1</sup>H NMR** (400 MHz, Chloroform-*d*)  $\delta$  7.25 (s, 1H), 7.14 – 7.05 (m, 2H), 6.96 (d, *J* = 7.5 Hz, 1H), 6.73 (d, *J* = 8.1 Hz, 1H), 5.50 (d, *J* = 15.0 Hz, 1H), 3.72 (s, 3H), 1.19 (s, 12H).

All recorded spectroscopic data matched those previously reported in the literature<sup>[13]</sup>.

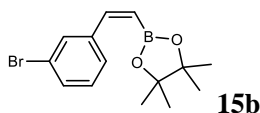

(Z)-2-(3-bromostyryl)-4,4,5,5-tetramethyl-1,3,2-dioxaborolane (**15b**): The title compound was prepared following general procedure A (1 mol% of [Co], 2 eq. HBpin). **15a** (72.4 mg, 0.4 mmol) was added into a vial with Co(acac)<sub>2</sub> (1.0 mg, 0.004 mmol), CNC-<sup>*i*</sup>Pr (2.6 mg, 0.0056 mmol), <sup>*t*</sup>BuOK (2.5 mg, 0.0224 mmol), HBpin (115 μL, 0.8 mmol, 2 equiv.) and DMF (0.5 mL). The reaction mixture was stirred for 24 hours. Purification by flash column chromatography on silica gel (eluent: petroleum ether → petroleum ether/EtOAc = 20/1) afforded the product as a yellow oil in 61% yield (74.7 mg, Z:E=99:1). [See spectrum](#)

<sup>1</sup>H NMR (400 MHz, Chloroform-*d*) δ 7.82 (s, 1H), 7.37 (dd, *J* = 12.8, 7.9 Hz, 2H), 7.21 – 7.09 (m, 2H), 5.66 (d, *J* = 14.8 Hz, 1H), 1.31 (s, 12H).

<sup>13</sup>C NMR (151 MHz, CDCl<sub>3</sub>) δ 146.5, 140.5, 131.2, 130.8, 129.5, 127.6, 122.2, 83.7, 24.9.

<sup>11</sup>B NMR (193 MHz, CDCl<sub>3</sub>) δ 30.1.

HRMS (APCI+) *m/z* calculated for C<sub>14</sub>H<sub>19</sub>BBro<sub>2</sub><sup>+</sup> ([M+H]<sup>+</sup>) 309.0656; found 309.0651.

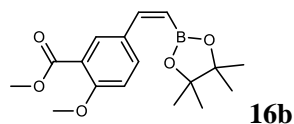

methyl (Z)-2-methoxy-5-(2-(4,4,5,5-tetramethyl-1,3,2-dioxaborolan-2-yl)vinyl)benzoate (**16b**): The title compound was prepared following general procedure A (1 mol% of [Co]). **16a** (76.1 mg, 0.4 mmol) was added into a vial with Co(acac)<sub>2</sub> (1.0 mg, 0.004 mmol), CNC-<sup>*i*</sup>Pr (2.6 mg, 0.0056 mmol), <sup>*t*</sup>BuOK (2.5 mg, 0.0224 mmol), HBpin (75 μL, 0.52 mmol, 1.3 equiv.) and DMF (0.5 mL). The reaction mixture was stirred for 12 hours. DBM was added as internal standard and NMR yield (99%) was obtained. Purification by flash column chromatography on silica gel (eluent: petroleum ether → petroleum ether/EtOAc = 10/1) eluent afforded the product as a white solid in 95% yield (120.3 mg, Z:E=99:1). [See spectrum](#)

<sup>1</sup>H NMR (600 MHz, Chloroform-*d*) δ 8.13 (d, *J* = 2.3 Hz, 1H), 7.64 (dd, *J* = 8.6, 2.3 Hz, 1H), 7.13 (d, *J* = 14.9 Hz, 1H), 6.91 (d, *J* = 8.7 Hz, 1H), 5.52 (d, *J* = 14.9 Hz, 1H), 3.90 (s, 3H), 3.87 (s, 3H), 1.29 (s, 12H).

<sup>13</sup>C NMR (151 MHz, CDCl<sub>3</sub>) δ 166.4, 159.0, 147.1, 134.2, 132.1, 130.7, 119.5, 111.4, 83.5, 56.1, 51.8, 24.8.

<sup>11</sup>B NMR (193 MHz, CDCl<sub>3</sub>) δ 30.3.

HRMS (ESI+) *m/z* calculated for C<sub>17</sub>H<sub>24</sub>BO<sub>5</sub><sup>+</sup> ([M+H]<sup>+</sup>) 319.1711; found 319.1710.

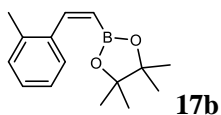

(Z)-4,4,5,5-tetramethyl-2-(2-methylstyryl)-1,3,2-dioxaborolane (**17b**): The title compound was prepared following general procedure A (0.2 mol% of [Co]). DBM was added as internal standard and NMR yield (92%) was obtained. Purification by flash column chromatography on silica gel (eluent: petroleum ether → petroleum ether/EtOAc = 20/1) afforded the product as a pale yellow oil in 74% yield (74.7 mg, Z:E>99:1). [See spectrum](#)

The title compound can also be synthesized according to general procedure A (0.5 mol% of [Co]), resulting in a >99% NMR yield (Z:E>99:1) when dibromomethane was used as the internal standard.

**<sup>1</sup>H NMR** (400 MHz, Chloroform-*d*) δ 7.46 – 7.33 (m, 2H), 7.23-7.09 (m, 3H), 5.72 – 5.67 (d, *J* = 14.8, 1H), 2.33 (s, 3H), 1.24 (s, 12H).

All recorded spectroscopic data matched those previously reported in the literature<sup>[13]</sup>.

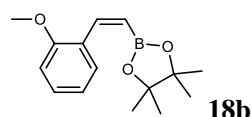

(*Z*)-2-(2-methoxystyryl)-4,4,5,5-tetramethyl-1,3,2-dioxaborolane (**18b**): The title compound was prepared following general procedure A (0.1 mol% of [Co], 0.8 mmol scale). DBM was added as internal standard and NMR yield (95%) was obtained. Purification by flash column chromatography on silica gel (eluent: petroleum ether → petroleum ether/EtOAc =20/1) afforded the product as a pale yellow oil in 89% yield (185.7 mg, Z:E=98:2). [See spectrum](#)

The title compound can also be synthesized according to general procedure A (0.5 mol% of [Co]), resulting in a 95% NMR yield (Z:E=99:1) when dibromomethane was used as the internal standard.

**<sup>1</sup>H NMR** (400 MHz, Chloroform-*d*) δ 7.52 (d, *J* = 7.6 Hz, 1H), 7.48 (d, *J* = 14.9 Hz, 1H), 7.25 (t, *J* = 7.7 Hz, 1H), 6.90 – 6.81 (m, 2H), 5.61 (d, *J* = 14.7 Hz, 1H), 3.81 (s, 3H), 1.25 (s, 12H).

All recorded spectroscopic data matched those previously reported in the literature<sup>[13]</sup>.

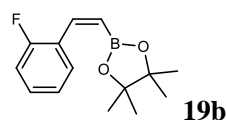

(*Z*)-2-(2-fluorostyryl)-4,4,5,5-tetramethyl-1,3,2-dioxaborolane (**19b**): The title compound was prepared following general procedure A (1 mol% of [Co]). **19a** (48.1 mg, 0.4 mmol) was added into a vial with Co(acac)<sub>2</sub> (1.0 mg, 0.004 mmol), CNC-*i*Pr (2.6 mg, 0.0056 mmol), <sup>t</sup>BuOK (2.5 mg, 0.0224 mmol), HBpin (75 μL, 0.52 mmol, 1.3 equiv.) and DMF (0.5 mL). The reaction mixture was stirred for 12 hours. DBM was added as internal standard and NMR yield (96%) was obtained. Purification by flash column chromatography on silica gel (eluent: petroleum ether → petroleum ether/EtOAc =20/1) afforded the product as a pale yellow oil in 82% yield (93.6 mg, Z:E=97:3). [See spectrum](#)

**<sup>1</sup>H NMR** (400 MHz, Chloroform-*d*) δ 7.61 (td, *J* = 7.7, 1.7 Hz, 1H), 7.32 (d, *J* = 14.8 Hz, 1H), 7.27-7.21 (m, 1H), 7.09 – 7.04 (m, 1H), 7.03-6.97 (m, 1H), 5.74 (d, *J* = 14.9 Hz, 1H), 1.27 (s, 12H)

**<sup>13</sup>C NMR** (151 MHz, CDCl<sub>3</sub>) δ 161.2, 159.6, 140.3, 130.2, 130.2, 129.6, 129.6, 126.5, 126.4, 123.3, 123.3, 115.2, 115.0, 83.5, 24.8.

**<sup>11</sup>B NMR** (193 MHz, CDCl<sub>3</sub>) δ 30.0.

**<sup>19</sup>F NMR** (565 MHz, CDCl<sub>3</sub>) δ -116.4.

**HRMS** (APCI+) *m/z* calculated for C<sub>14</sub>H<sub>19</sub>BF<sub>2</sub>O<sub>2</sub><sup>+</sup> ([M+H]<sup>+</sup>) 249.1457; found 249.1454.

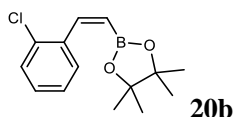

(Z)-2-(2-chlorostyryl)-4,4,5,5-tetramethyl-1,3,2-dioxaborolane (**20b**): The title compound was prepared following general procedure A (1 mol% of [Co], 2 eq. HBPIn, 0.5 mmol scale). **20a** (68.3 mg, 0.5 mmol) was added into a vial with Co(acac)<sub>2</sub> (1.3 mg, 0.005 mmol), CNC-<sup>*i*</sup>Pr (3.3 mg, 0.007 mmol), <sup>*t*</sup>BuOK (3.1 mg, 0.028 mmol), HBpin (144 μL, 1 mmol, 2 equiv.) and DMF (0.5 mL). The reaction mixture was stirred for 12 hours. DBM was added as internal standard and NMR yield (97%) was obtained. Purification by flash column chromatography on silica gel (eluent: petroleumether→ petroleumether/EtOAc =20/1) afforded the product as a pale yellow oil in 87% yield (46.0 mg, Z:E>99:1). [See spectrum](#)

<sup>1</sup>H NMR (400 MHz, Chloroform-*d*) δ 7.55 (d, *J* = 7.3 Hz, 1H), 7.44 (d, *J* = 14.6 Hz, 1H), 7.33 (d, *J* = 7.6 Hz, 1H), 7.19 (p, *J* = 7.3 Hz, 2H), 5.74 (d, *J* = 14.6 Hz, 1H), 1.24 (s, 12H).

<sup>13</sup>C NMR (101 MHz, CDCl<sub>3</sub>) δ 145.1, 136.9, 133.6, 130.3, 129.2, 129.1, 126.0, 83.5, 24.8.

<sup>11</sup>B NMR (128 MHz, CDCl<sub>3</sub>) δ 30.2.

HRMS (APCI+) *m/z* calculated for C<sub>14</sub>H<sub>19</sub>BClO<sub>2</sub>+ ([M+H]<sup>+</sup>) 265.1161; found 265.1159.

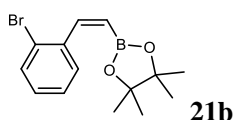

(Z)-2-(2-bromostyryl)-4,4,5,5-tetramethyl-1,3,2-dioxaborolane (**21b**): The title compound was prepared following general procedure A (1 mol% of [Co], 2.5 eq. HBPIn, 0.2 mmol scale). **21a** (36.2 mg, 0.2 mmol) was added into a vial with Co(acac)<sub>2</sub> (0.5 mg, 0.002 mmol), CNC-<sup>*i*</sup>Pr (1.3 mg, 0.0028 mmol), <sup>*t*</sup>BuOK (1.3 mg, 0.0112 mmol), HBpin (72 μL, 0.5 mmol, 2.5 equiv.) and DMF (0.5 mL). The reaction mixture was stirred for 12 hours. DBM was added as internal standard and NMR yield (77%) was obtained. Purification by flash column chromatography on silica gel (eluent: petroleumether→ petroleumether/EtOAc =20/1) afforded the product as a pale yellow oil in 74% yield (46.2 mg, Z:E=97:3). [See spectrum](#)

The title compound can also be synthesized according to general procedure A (0.5 mol% of [Co]), resulting in a 29% NMR yield (Z:E=27:2) when dibromomethane was used as the internal standard. When conditions were modified to 1.0 mol% of [Co], 2 eq. HBPIn, an NMR yield (60%) was obtained. Purification by flash column chromatography on silica gel (eluent: petroleumether→ petroleumether/EtOAc =20/1) afforded the product as a pale yellow oil in 45% yield (56.2 mg, Z:E=95:5).

<sup>1</sup>H NMR (400 MHz, Chloroform-*d*) δ 7.53 (d, *J* = 7.9 Hz, 2H), 7.37 (d, *J* = 14.6 Hz, 1H), 7.22 (t, *J* = 7.5 Hz, 1H), 7.13 (td, *J* = 7.8, 1.5 Hz, 1H), 5.71 (d, *J* = 14.6 Hz, 1H), 1.23 (s, 12H).

<sup>13</sup>C NMR (151 MHz, CDCl<sub>3</sub>) δ 147.4, 138.6, 132.3, 130.5, 129.3, 126.6, 123.8, 83.5, 24.8.

<sup>11</sup>B NMR (193 MHz, CDCl<sub>3</sub>) δ 30.1.

HRMS (APCI+) *m/z* calculated for C<sub>14</sub>H<sub>19</sub>BBrO<sub>2</sub>+ ([M+H]<sup>+</sup>) 309.0656; found 309.0649.

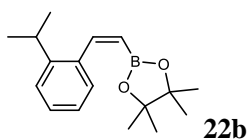

(Z)-2-(2-isopropylstyryl)-4,4,5,5-tetramethyl-1,3,2-dioxaborolane (**22b**): The title compound was prepared following general procedure A (0.5 mol% of [Co]). **22a** (57.7 mg, 0.4 mmol) was added into a vial with Co(acac)<sub>2</sub> (0.5 mg, 0.002 mmol), CNC-<sup>*i*</sup>Pr (1.3 mg, 0.0028 mmol), <sup>*t*</sup>BuOK (1.3 mg, 0.0112 mmol), HBpin (75 μL, 0.52 mmol, 1.3 equiv.) and DMF (0.5 mL). The reaction mixture was stirred for 30 minutes. DBM was added as internal standard and NMR yield (83%) was obtained. Purification by flash column chromatography on silica gel (eluent: petroleum ether → petroleum ether/EtOAc = 20/1) afforded the product as a pale yellow oil in 78% yield (84.9 mg, Z:E > 99:1). [See spectrum](#)

<sup>1</sup>H NMR (400 MHz, Chloroform-*d*) δ 7.49 (d, *J* = 14.4 Hz, 1H), 7.30 (d, *J* = 7.9 Hz, 1H), 7.26 – 7.21 (m, 2H), 7.11–7.04 (m, 1H), 5.66 (d, *J* = 14.4 Hz, 1H), 3.15 (hept, *J* = 6.9 Hz, 1H), 1.21 (d, *J* = 6.9 Hz, 6H), 1.17 (s, 12H).

<sup>13</sup>C NMR (101 MHz, CDCl<sub>3</sub>) δ 147.4, 146.2, 137.4, 129.3, 128.1, 124.9, 124.2, 83.2, 29.7, 24.7, 23.3.

<sup>11</sup>B NMR (128 MHz, CDCl<sub>3</sub>) δ 30.6.

HRMS (ESI+) *m/z* calculated for C<sub>17</sub>H<sub>26</sub>BO<sub>2</sub><sup>+</sup> ([M+H]<sup>+</sup>) 273.2020; found 273.2017.

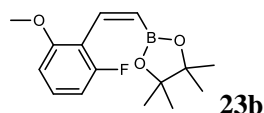

(Z)-2-(2-fluoro-6-methoxystyryl)-4,4,5,5-tetramethyl-1,3,2-dioxaborolane (**23b**): The title compound was prepared following general procedure A (0.5 mol% of [Co]). **23a** (60.1 mg, 0.4 mmol) was added into a vial with Co(acac)<sub>2</sub> (0.5 mg, 0.002 mmol), CNC-<sup>*i*</sup>Pr (1.3 mg, 0.0028 mmol), <sup>*t*</sup>BuOK (1.3 mg, 0.0112 mmol), HBpin (75 μL, 0.52 mmol, 1.3 equiv.) and DMF (0.5 mL). The reaction mixture was stirred for 12 hours. DBM was added as internal standard and NMR yield (99%) was obtained. Purification by flash column chromatography on silica gel (eluent: petroleum ether → petroleum ether/EtOAc = 20/1) afforded the product as a white solid in 88% yield (98.2 mg, Z:E = 99:1). [See spectrum](#)

<sup>1</sup>H NMR (600 MHz, Chloroform-*d*) δ 7.16 (q, *J* = 8.0 Hz, 1H), 7.04 (d, *J* = 14.8 Hz, 1H), 6.68 – 6.61 (m, 2H), 5.88 (d, *J* = 14.8 Hz, 1H), 3.81 (s, 3H), 1.21 (s, 12H).

<sup>13</sup>C NMR (151 MHz, CDCl<sub>3</sub>) δ 161.1, 159.5, 158.2, 136.3, 128.7, 128.6, 116.6, 116.5, 107.9, 107.8, 106.0, 106.0, 83.1, 56.0, 24.8.

<sup>11</sup>B NMR (193 MHz, CDCl<sub>3</sub>) δ 29.6.

<sup>19</sup>F NMR (565 MHz, CDCl<sub>3</sub>) δ -113.4.

HRMS (ESI+) *m/z* calculated for C<sub>15</sub>H<sub>21</sub>BF<sub>3</sub>O<sub>3</sub><sup>+</sup> ([M+H]<sup>+</sup>) 279.1562; found 279.1565.

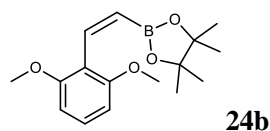

(Z)-2-(2,6-dimethoxystyryl)-4,4,5,5-tetramethyl-1,3,2-dioxaborolane (**24b**): The title compound was prepared following general procedure A (0.5 mol% of [Co], 0.2 mmol scale, 3 eq. HBpin). **24a** (32.4 mg, 0.2 mmol) was added into a vial with Co(acac)<sub>2</sub> (0.25 mg, 0.001 mmol), CNC-<sup>*i*</sup>Pr (0.65 mg, 0.0014 mmol), <sup>*t*</sup>BuOK (0.6 mg, 0.0056 mmol), HBpin (87 μL, 0.6 mmol, 3 equiv.) and DMF (0.5 mL). The reaction mixture was stirred for 1 hours. DBM was added as internal standard and

NMR yield (>99%) was obtained. Purification by flash column chromatography on silica gel (eluent: petroleumether→ petroleumether/EtOAc =20/1) afforded the product as a white solid in 90% yield (52.3 mg, Z:E>99:1). [See spectrum](#)

**<sup>1</sup>H NMR** (400 MHz, Chloroform-*d*) δ 7.16 (t, *J* = 8.3 Hz, 1H), 7.06 (d, *J* = 14.8 Hz, 1H), 6.53 (d, *J* = 8.3 Hz, 2H), 5.84 (d, *J* = 14.8 Hz, 1H), 3.77 (s, 6H), 1.18 (s, 12H).

**<sup>13</sup>C NMR** (101 MHz, CDCl<sub>3</sub>) δ 157.7, 138.2, 128.4, 117.7, 104.2, 82.6, 56.0, 24.9.

**<sup>11</sup>B NMR** (128 MHz, CDCl<sub>3</sub>) δ 29.0.

**HRMS** (ESI+) *m/z* calculated for C<sub>16</sub>H<sub>24</sub>BO<sub>1</sub>+ ([M+H]<sup>+</sup>) 291.1762; found 291.1759.

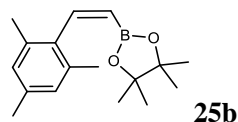

(*Z*)-4,4,5,5-tetramethyl-2-(2,4,6-trimethylstyryl)-1,3,2-dioxaborolane (**25b**): The title compound was prepared following general procedure A (0.5 mol% of [Co]). **25a** (57.7 mg, 0.4 mmol) was added into a vial with Co(acac)<sub>2</sub> (0.5 mg, 0.002 mmol), CNC-*i*Pr (1.3 mg, 0.0028 mmol), <sup>t</sup>BuOK (1.3 mg, 0.0112 mmol), HBpin (75 μL, 0.52 mmol, 1.3 equiv.) and DMF (0.5 mL). The reaction mixture was stirred for 12 hours. DBM was added as internal standard and NMR yield (98%) was obtained. Purification by flash column chromatography on silica gel (eluent: petroleumether→ petroleumether/EtOAc =20/1) afforded the product as a white solid in 90% yield (98.3 mg, Z:E=98:2). [See spectrum](#)

**<sup>1</sup>H NMR** (600 MHz, Chloroform-*d*) δ 7.17 (d, *J* = 14.5 Hz, 1H), 6.81 (s, 2H), 5.84 (d, *J* = 14.5 Hz, 1H), 2.28 (s, 3H), 2.20 (s, 6H), 1.08 (s, 12H).

**<sup>13</sup>C NMR** (151 MHz, CDCl<sub>3</sub>) δ 148.4, 136.4, 135.7, 135.1, 127.4, 82.8, 24.6, 21.0, 20.5.

**<sup>11</sup>B NMR** (128 MHz, CDCl<sub>3</sub>) δ 28.8.

**HRMS** (ESI+) *m/z* calculated for C<sub>17</sub>H<sub>26</sub>B<sub>1</sub>O<sub>2</sub>+ ([M+H]<sup>+</sup>) 273.2020; found 273.2018.

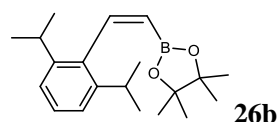

(*Z*)-2-(2,6-diisopropylstyryl)-4,4,5,5-tetramethyl-1,3,2-dioxaborolane (**26b**): The title compound was prepared following general procedure A (0.5 mol% of [Co]). **26a** (74.5 mg, 0.4 mmol) was added into a vial with Co(acac)<sub>2</sub> (0.5 mg, 0.002 mmol), CNC-*i*Pr (1.3 mg, 0.0028 mmol), <sup>t</sup>BuOK (1.3 mg, 0.0112 mmol), HBpin (75 μL, 0.52 mmol, 1.3 equiv.) and DMF (0.5 mL). The reaction mixture was stirred for 12 hours. DBM was added as internal standard and NMR yield (92%) was obtained. Purification by flash column chromatography on silica gel (eluent: petroleumether→ petroleumether/EtOAc =20/1) afforded the product as a pale yellow oil in 88% yield (111.2 mg, Z:E>99:1). [See spectrum](#)

**<sup>1</sup>H NMR** (400 MHz, Chloroform-*d*) δ 7.36 (d, *J* = 14.5 Hz, 1H), 7.25 – 7.18 (m, 1H), 7.09 (d, *J* = 7.7 Hz, 2H), 5.91 (d, *J* = 14.5 Hz, 1H), 3.19 (hept, *J* = 6.9 Hz, 2H), 1.17 (d, *J* = 6.5 Hz, 12H), 1.05 (s, 12H).

**<sup>13</sup>C NMR** (101 MHz, CDCl<sub>3</sub>) δ 148.6, 145.6, 137.1, 126.9, 121.6, 82.8, 30.0, 24.6, 23.4.

**<sup>11</sup>B NMR** (128 MHz, CDCl<sub>3</sub>) δ 29.6.

**HRMS** (ESI+) *m/z* calculated for C<sub>20</sub>H<sub>32</sub>B<sub>2</sub>O<sub>2</sub>+ ([M+H]<sup>+</sup>) 315.2490; found 315.2487.

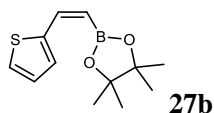

(*Z*)-4,4,5,5-tetramethyl-2-(2-(thiophen-2-yl)vinyl)-1,3,2-dioxaborolane (**27b**): The title compound was prepared following general procedure A (0.5 mol% of [Co], 2 eq. HBPin). DBM was added as internal standard and NMR yield (89%) was obtained. Purification by flash column chromatography on silica gel (eluent: petroleumether→ petroleumether/EtOAc =20/1) afforded the product as a pale yellow oil in 81% yield (76.4 mg, Z:E=99:1). [See spectrum](#)

<sup>1</sup>H NMR (400 MHz, Chloroform-*d*) δ 7.40 (d, *J* = 3.6 Hz, 1H), 7.28 (d, *J* = 5.0 Hz, 1H), 7.23 (d, *J* = 15.0 Hz, 1H), 6.99 (dd, *J* = 5.1, 3.6 Hz, 1H), 5.44 (d, *J* = 15.1 Hz, 1H), 1.34 (s, 12H).

All recorded spectroscopic data matched those previously reported in the literature<sup>[15]</sup>.

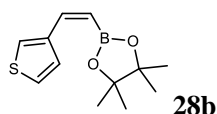

(*Z*)-4,4,5,5-tetramethyl-2-(2-(thiophen-3-yl)vinyl)-1,3,2-dioxaborolane (**28b**): The title compound was prepared following general procedure A (0.5 mol% of [Co]). DBM was added as internal standard and NMR yield (99%) was obtained. Purification by flash column chromatography on silica gel (eluent: petroleumether→ petroleumether/EtOAc =20/1) afforded the product as a pale yellow oil in 93% yield (92.25 mg, Z:E>99:1). [See spectrum](#)

<sup>1</sup>H NMR (400 MHz, Chloroform-*d*) δ 7.62 (dd, *J* = 38.7, 3.8 Hz, 2H), 7.23 (dd, *J* = 5.0, 3.0 Hz, 1H), 7.17 (d, *J* = 15.1 Hz, 1H), 5.48 (d, *J* = 15.1 Hz, 1H), 1.32 (s, 12H).

<sup>13</sup>C NMR (151 MHz, CDCl<sub>3</sub>) δ 141.9, 140.7, 128.6, 126.2, 124.9, 83.5, 24.9.

<sup>11</sup>B NMR (193 MHz, CDCl<sub>3</sub>) δ 30.0.

All recorded spectroscopic data matched those previously reported in the literature<sup>[13]</sup>.

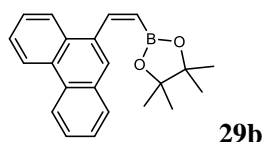

(*Z*)-4,4,5,5-tetramethyl-2-(2-(phenanthren-9-yl)vinyl)-1,3,2-dioxaborolane (**29b**): The title compound was prepared following general procedure A (1 mol% of [Co], 2 eq. HBPin). **29a** (80.9 mg, 0.4 mmol) was added into a vial with Co(acac)<sub>2</sub> (1.0 mg, 0.004 mmol), CNC-<sup>*i*</sup>Pr (2.6 mg, 0.0056 mmol), <sup>*t*</sup>BuOK (2.5 mg, 0.0224 mmol), HBpin (115 μL, 0.8 mmol, 2 equiv.) and DMF (0.5 mL). The reaction mixture was stirred for 12 hours. DBM was added as internal standard and NMR yield (83%) was obtained. Purification by flash column chromatography on silica gel (eluent: petroleumether→ petroleumether/EtOAc =20/1) afforded the product as a white solid in 82% yield (107.8 mg, Z:E=98:2). [See spectrum](#)

The title compound can also be synthesized according to general procedure A (0.5 mol% of [Co]), resulting in a 51% NMR yield (Z:E>99:1) when dibromomethane was used as the internal standard. When 1.0 mol% of [Co] was used, an NMR yield of 60% with a Z:E > 99:1 was obtained.

<sup>1</sup>H NMR (600 MHz, Chloroform-*d*) δ 8.73 (d, *J* = 8.1 Hz, 1H), 8.68 (d, *J* = 8.1 Hz, 1H), 8.11 (d, *J* = 8.0 Hz, 1H), 7.91 (d, *J* = 14.2 Hz, 1H), 7.87 (d, *J* = 7.7 Hz, 1H), 7.84 (s, 1H), 7.69 – 7.60 (m, 4H), 5.98 (d, *J* = 14.2 Hz, 1H), 1.18 (s, 12H).



$^{13}\text{C}$  NMR (151 MHz,  $\text{CDCl}_3$ )  $\delta$  146.5, 135.0, 131.5, 130.9, 130.5, 130.2, 128.6, 127.1, 126.6, 126.6, 126.5, 126.3, 125.4, 122.9, 122.6, 83.3, 24.7.

$^{11}\text{B}$  NMR (193 MHz,  $\text{CDCl}_3$ )  $\delta$  30.6.

HRMS (ESI+)  $m/z$  calculated for  $\text{C}_{22}\text{H}_{24}\text{BO}_2^+$  ( $[\text{M}+\text{H}]^+$ ) 338.1864; found 331.1862.

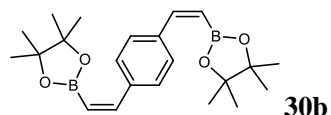

1,4-bis((Z)-2-(4,4,5,5-tetramethyl-1,3,2-dioxaborolan-2-yl)vinyl)benzene (**30b**): The title compound was prepared following general procedure A (0.5 mol% of [Co], 0.2 mmol scale, 2 eq. HBpin), the reaction mixture was stirred for 1 hours. DBM was added as internal standard and NMR yield (85%) was obtained. Purification by flash column chromatography on silica (eluent: petroleum ether  $\rightarrow$  petroleum ether/EtOAc = 20/1) afforded the product as a white solid in 82% yield (62.2 mg, Z:E=95:5). [See spectrum](#)

$^1\text{H}$  NMR (400 MHz, Chloroform- $d$ )  $\delta$  7.51 (s, 4H), 7.18 (d,  $J = 14.9$  Hz, 2H), 5.58 (d,  $J = 14.9$  Hz, 2H), 1.30 (s, 24H).

All recorded spectroscopic data matched those previously reported in the literature<sup>[16]</sup>.

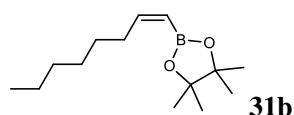

(Z)-4,4,5,5-tetramethyl-2-(oct-1-en-1-yl)-1,3,2-dioxaborolane (**31b**): The title compound was prepared following general procedure A (1 mol% of [Co]), the reaction mixture was stirred for 24 hours. DBM was added as internal standard and NMR yield (76%) was obtained. Purification by flash column chromatography on silica gel (eluent: petroleum ether  $\rightarrow$  petroleum ether/EtOAc = 20/1) afforded the product as a colorless oil in 74% yield (68.2 mg, Z:E=98:2). [See spectrum](#)

$^1\text{H}$  NMR (400 MHz, Chloroform- $d$ )  $\delta$  6.43 (dt,  $J = 14.3, 7.5$  Hz, 1H), 5.32 (dt,  $J = 13.5, 1.3$  Hz, 1H), 2.38 (m, 2H), 1.41 – 1.27 (m, 8H), 1.26 (s, 12H), 0.88 (t,  $J = 6.8$ , 3H).

$^{11}\text{B}$  NMR (193 MHz,  $\text{CDCl}_3$ )  $\delta$  29.8.

All recorded spectroscopic data matched those previously reported in the literature<sup>[13]</sup>.

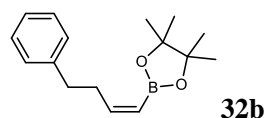

(Z)-4,4,5,5-tetramethyl-2-(4-phenylbut-1-en-1-yl)-1,3,2-dioxaborolane (**32b**): The title compound was prepared following general procedure A (1 mol% of [Co]). DBM was added as internal standard and NMR yield (72%) was obtained. Purification by flash column chromatography on silica gel (eluent: petroleum ether  $\rightarrow$  petroleum ether/EtOAc = 20/1) afforded the product as a colorless oil in 60% yield (61.8 mg, Z:E=98:2). [See spectrum](#)

$^1\text{H}$  NMR (400 MHz, Chloroform- $d$ )  $\delta$  7.34 – 7.16 (m, 5H), 6.49 (dt,  $J = 13.3, 6.0$  Hz, 1H), 5.39 (d,  $J = 13.5$  Hz, 1H), 2.81 – 2.68 (m, 4H), 1.27 (s, 12H).

All recorded spectroscopic data matched those previously reported in the literature<sup>[17]</sup>.

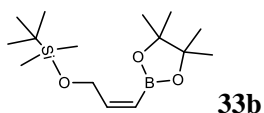

(Z)-tert-butylidimethyl((3-(4,4,5,5-tetramethyl-1,3,2-dioxaborolan-2-yl)allyl)oxy)silane (**33b**): The title compound was prepared following general procedure A (1 mol% of [Co], 2 eq. HBpin). DBM was added as internal standard and NMR yield (52%) was obtained. Purification by flash column chromatography on silica gel (eluent: petroleumether→petroleumether/EtOAc =20/1) afforded the product as a colorless oil in 48% yield (56.7 mg, Z:E=97:3). [See spectrum](#)

<sup>1</sup>H NMR (400 MHz, Chloroform-*d*) δ 6.50 (dt, *J* = 12.9, 5.9 Hz, 1H), 5.38 (d, *J* = 13.8 Hz, 1H), 4.49 (d, *J* = 6.1 Hz, 2H), 1.25 (s, 12H), 0.90 (s, 9H), 0.07 (s, 6H).

All recorded spectroscopic data matched those previously reported in the literature<sup>[18]</sup>.

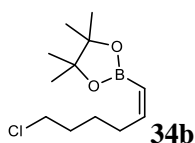

(Z)-2-(6-chlorohex-1-en-1-yl)-4,4,5,5-tetramethyl-1,3,2-dioxaborolane (**34b**): The title compound was prepared following general procedure A (1 mol% of [Co]). **34a** (46.6 mg, 0.4 mmol) was added into a vial with Co(acac)<sub>2</sub> (1.0 mg, 0.004 mmol), CNC-<sup>*i*</sup>Pr (2.6 mg, 0.0056 mmol), <sup>*t*</sup>BuOK (2.5 mg, 0.0224 mmol), HBpin (75 μL, 0.52 mmol, 1.3 equiv.) and DMF (0.5 mL). The reaction mixture was stirred for 12 hours. DBM was added as internal standard and NMR yield (71%) was obtained. Purification by flash column chromatography on silica gel (eluent: petroleumether→petroleumether/EtOAc =20/1) afforded the product as a colorless oil in 63% yield (61.6 mg, Z:E=95:5). [See spectrum](#)

<sup>1</sup>H NMR (400 MHz, Chloroform-*d*) δ 6.37 (dt, *J* = 14.3, 7.5 Hz, 1H), 5.34 (dt, *J* = 13.5, 1.2 Hz, 1H), 3.53 (t, *J* = 6.8 Hz, 2H), 2.40 (m, 2H), 1.76 (p, *J* = 6.9 Hz, 2H), 1.51 (p, *J* = 7.3 Hz, 2H), 1.24 (s, 12H).

<sup>13</sup>C NMR (101 MHz, CDCl<sub>3</sub>) δ 154.1, 82.9, 44.9, 31.8, 31.1, 26.5, 24.9.

<sup>11</sup>B NMR (128 MHz, CDCl<sub>3</sub>) δ 29.8.

HRMS (APCI+) *m/z* calculated for C<sub>12</sub>H<sub>23</sub>BClO<sub>2</sub>+ ([M+H]<sup>+</sup>) 245.1474; found 245.1470.

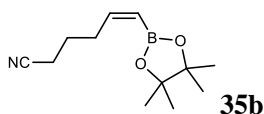

(Z)-6-(4,4,5,5-tetramethyl-1,3,2-dioxaborolan-2-yl)hex-5-enenitrile (**35b**): The title compound was prepared following general procedure A (1 mol% of [Co]). **35a** (37.3 mg, 0.4 mmol) was added into a vial with Co(acac)<sub>2</sub> (1.0 mg, 0.004 mmol), CNC-<sup>*i*</sup>Pr (2.6 mg, 0.0056 mmol), <sup>*t*</sup>BuOK (2.5 mg, 0.0224 mmol), HBpin (75 μL, 0.52 mmol, 1.3 equiv.) and DMF (0.5 mL). The reaction mixture was stirred for 12 hours. DBM was added as internal standard and NMR yield (99%) was obtained. Purification by flash column chromatography on silica gel (eluent: petroleumether→petroleumether/EtOAc =10/1) afforded the product as a colorless oil in 99% yield (85.3 mg, Z:E>99:1). [See spectrum](#)

<sup>1</sup>H NMR (400 MHz, Chloroform-*d*) δ 6.35 (dt, *J* = 14.1, 7.4 Hz, 1H), 5.45 (d, *J* = 13.4 Hz, 1H), 2.53 (m, 2H), 2.33 (t, *J* = 7.3 Hz, 2H), 1.77 (p, *J* = 7.2 Hz, 2H), 1.27 (s, 12H).

$^{13}\text{C}$  NMR (101 MHz,  $\text{CDCl}_3$ )  $\delta$  151.5, 119.9, 83.2, 31.0, 25.2, 24.9, 16.4.

$^{11}\text{B}$  NMR (193 MHz,  $\text{CDCl}_3$ )  $\delta$  29.5.

HRMS (ESI+)  $m/z$  calculated for  $\text{C}_{12}\text{H}_{20}\text{BNO}_2\text{Na}^+$  ( $[\text{M}+\text{Na}]^+$ ) 244.1479; found 244.1476.

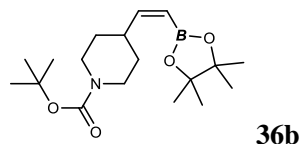

tert-butyl (Z)-4-(2-(4,4,5,5-tetramethyl-1,3,2-dioxaborolan-2-yl)vinyl)piperidine-1-carboxylate (**36b**): The title compound was prepared following general procedure A (1 mol% of [Co]). **36a** (83.7 mg, 0.4 mmol) was added into a vial with  $\text{Co}(\text{acac})_2$  (1.0 mg, 0.004 mmol),  $\text{CNC-}^i\text{Pr}$  (2.6 mg, 0.0056 mmol),  $^t\text{BuOK}$  (2.5 mg, 0.0224 mmol), HBpin (75  $\mu\text{L}$ , 0.52 mmol, 1.3 equiv.) and DMF (0.5 mL). The reaction mixture was stirred for 12 hours. DBM was added as internal standard and NMR yield (99%) was obtained. Purification by flash column chromatography on silica gel (eluent: petroleum ether  $\rightarrow$  petroleum ether/EtOAc =20/1) afforded the product as a pale yellow oil in 95% yield (128.3 mg, Z:E>99:1). [See spectrum](#)

$^1\text{H}$  NMR (600 MHz, Chloroform-*d*)  $\delta$  6.22 (dd,  $J$  = 13.4, 9.2 Hz, 1H), 5.31 (d,  $J$  = 13.5 Hz, 1H), 4.21 – 3.92 (m, 2H), 2.93 – 2.82 (m, 1H), 2.75 (m, 2H), 1.60 (d,  $J$  = 12.7 Hz, 2H), 1.45 (s, 9H), 1.26 (s, 14H).

$^{13}\text{C}$  NMR (151 MHz,  $\text{CDCl}_3$ )  $\delta$  158.3, 155.1, 83.1, 79.3, 43.7, 38.9, 32.2, 28.6, 25.0.

$^{11}\text{B}$  NMR (193 MHz,  $\text{CDCl}_3$ )  $\delta$  29.8.

HRMS (APCI+)  $m/z$  calculated for  $\text{C}_{18}\text{H}_{32}\text{BNO}_4\text{Na}^+$  ( $[\text{M}+\text{H}]^+$ ) 360.2316; found 360.2315

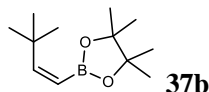

(Z)-2-(3,3-dimethylbut-1-en-1-yl)-4,4,5,5-tetramethyl-1,3,2-dioxaborolane (**37b**): The title compound was prepared following general procedure A (1 mol% of [Co]). DBM was added as internal standard and NMR yield (46%) was obtained. Isolated yield was unobtainable due to its low boiling point (Z:E=97:3). [See spectrum](#)

$^1\text{H}$  NMR (400 MHz, Chloroform-*d*)  $\delta$  6.24 (d,  $J$  = 15.0 Hz, 1H), 5.16 (d,  $J$  = 15.0 Hz, 1H), 1.25 (s, 12H), 1.08 (s, 9H).

All recorded spectroscopic data matched those previously reported in the literature<sup>[18]</sup>.

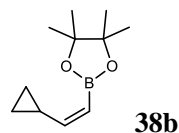

(Z)-2-(2-cyclopropylvinyl)-4,4,5,5-tetramethyl-1,3,2-dioxaborolane (**38b**): The title compound was prepared following general procedure A (1 mol% of [Co]). DBM was added as internal standard and NMR yield (87%) was obtained. Purification by flash column chromatography on silica gel (eluent: petroleum ether  $\rightarrow$  petroleum ether/EtOAc =20/1) afforded the product as a pale yellow oil in 81% yield (78.3 mg, Z:E=98:2). [See spectrum](#)

**<sup>1</sup>H NMR** (400 MHz, Chloroform-*d*) δ 5.73 – 5.58 (m, 1H), 5.18 (d, *J* = 13.5 Hz, 1H), 2.35 – 2.23 (m, 1H), 1.27 (s, 12H), 0.87 – 0.78 (m, 2H), 0.45 – 0.36 (m, 2H).

All recorded spectroscopic data matched those previously reported in the literature<sup>[19]</sup>.

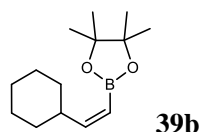

(*Z*)-2-(2-cyclohexylvinyl)-4,4,5,5-tetramethyl-1,3,2-dioxaborolane (**39b**): The title compound was prepared following general procedure A (1 mol% of [Co]). DBM was added as internal standard and NMR yield (89%) was obtained. Purification by flash column chromatography on silica gel (eluent: petroleumether → petroleumether/EtOAc =20/1) afforded the product as a pale yellow oil in 75% yield (66.3 mg, *Z*:*E*=97:3). [See spectrum](#)

**<sup>1</sup>H NMR** (400 MHz, Chloroform-*d*) δ 6.25 (dd, *J* = 13.3, 9.4 Hz, 1H), 5.22 (dd, *J* = 13.5, 0.8 Hz, 1H), 2.78 – 2.62 (m, 1H), 1.72 – 1.62 (m, 4H), 1.36-1.27 (m, 2H), 1.26 (s, 12H), 1.23-1.01 (m, 4H).

<sup>1</sup>H NMR spectra are consistent with previously reported data<sup>[17]</sup>.

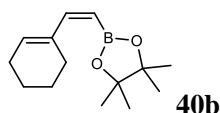

(*Z*)-2-(2-(cyclohex-1-en-1-yl)vinyl)-4,4,5,5-tetramethyl-1,3,2-dioxaborolane (**40b**): The title compound was prepared following general procedure A (1 mol% of [Co], 2 eq. HBpin). DBM was added as internal standard and NMR yield (99%) was obtained. Purification by flash column chromatography on silica gel (eluent: petroleumether → petroleumether/EtOAc =20/1) afforded the product as a colorless oil in 91% yield (86.7 mg, *Z*:*E*=99:1). [See spectrum](#)

**<sup>1</sup>H NMR** (400 MHz, Chloroform-*d*) δ 6.64 (d, *J* = 14.9 Hz, 1H), 5.83 (s, 1H), 5.17 (d, *J* = 14.9 Hz, 1H), 2.29 – 2.21 (m, 2H), 2.17 – 2.08 (m, 2H), 1.67 – 1.55 (m, 4H), 1.28 (s, 12H).

**<sup>13</sup>C NMR** (101 MHz, CDCl<sub>3</sub>) δ 149.8, 138.0, 132.0, 83.3, 26.3, 26.0, 24.8, 22.5, 22.1.

**<sup>11</sup>B NMR** (128 MHz, CDCl<sub>3</sub>) δ 30.1.

All recorded spectroscopic data matched those previously reported in the literature<sup>[20]</sup>.

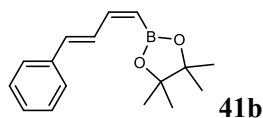

4,4,5,5-tetramethyl-2-((1*Z*,3*E*)-4-phenylbuta-1,3-dien-1-yl)-1,3,2-dioxaborolane (**41b**): The title compound was prepared following general procedure A (1 mol% of [Co]), the reaction mixture was stirred for 40 mins. DBM was added as internal standard and NMR yield (86%) was obtained. Purification by flash column chromatography on silica gel (eluent: petroleumether → petroleumether/EtOAc =20/1) afforded the product as a colorless oil in 80% yield (82.2 mg, *Z*:*E*=99:1). [See spectrum](#)

**<sup>1</sup>H NMR** (600 MHz, Chloroform-*d*) δ 7.67 (dd, *J* = 15.3, 11.4 Hz, 1H), 7.46 (d, *J* = 7.4 Hz, 2H), 7.35 (t, *J* = 7.3 Hz, 2H), 7.26 (t, *J* = 7.1 Hz, 1H), 7.03 (t, *J* = 12.1 Hz, 1H), 6.66 (d, *J* = 15.7 Hz, 1H), 5.48 (d, *J* = 13.2 Hz, 1H), 1.33 (s, 12H).

$^{13}\text{C}$  NMR (151 MHz,  $\text{CDCl}_3$ )  $\delta$  150.4, 137.2, 136.4, 129.4, 128.6, 127.9, 126.9, 83.1, 24.9.

$^{11}\text{B}$  NMR (193 MHz,  $\text{CDCl}_3$ )  $\delta$  29.6.

All recorded spectroscopic data matched those previously reported in the literature<sup>[20]</sup>.

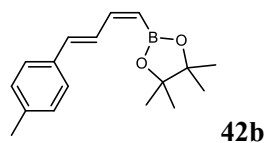

4,4,5,5-tetramethyl-2-((1Z,3E)-4-(p-tolyl)buta-1,3-dien-1-yl)-1,3,2-dioxaborolane (**42b**): The title compound was prepared following general procedure A (1 mol% of [Co]), the reaction mixture was stirred for 10 mins. DBM was added as internal standard and NMR yield (99%) was obtained. Purification by flash column chromatography on silica gel (eluent: petroleum ether  $\rightarrow$  petroleum ether/EtOAc = 20/1) afforded the product as a colorless oil in 92% yield (99.8 mg, Z:E > 99:1). [See spectrum](#)

$^1\text{H}$  NMR (600 MHz, Chloroform-*d*)  $\delta$  7.63 (dd,  $J = 15.6, 11.1$  Hz, 1H), 7.35 (d,  $J = 7.9$  Hz, 2H), 7.15 (d,  $J = 7.8$  Hz, 2H), 7.02 (t,  $J = 12.1$  Hz, 1H), 6.63 (d,  $J = 15.6$  Hz, 1H), 5.45 (d,  $J = 13.3$  Hz, 1H), 2.36 (s, 3H), 1.33 (s, 12H).

$^{13}\text{C}$  NMR (151 MHz,  $\text{CDCl}_3$ )  $\delta$  150.6, 137.9, 136.4, 134.5, 129.3, 128.6, 126.8, 83.1, 24.9, 21.3.

$^{11}\text{B}$  NMR (193 MHz,  $\text{CDCl}_3$ )  $\delta$  29.9.

All recorded spectroscopic data matched those previously reported in the literature<sup>[20]</sup>.

#### 4. Time-dependent Z/E selective transformation

**General procedure B:** In a nitrogen atmosphere, a vial was charged with  $\text{Co}(\text{acac})_2$  (4.1 mg, 0.016 mmol),  $\text{CNC-}^i\text{Pr}$  (10.2 mg, 0.022 mmol),  $^t\text{BuOK}$  (10.1 mg, 0.09 mmol) dissolved in dry DMF (2 mL) and was stirred for 5 mins. The freshly prepared stock solution of the *in situ* prepared active catalyst ([Co]=8.0 mM in DMF) was added via a micro-syringe (50-500  $\mu\text{L}$ , 0.0004-0.004 mmol, 0.1-1 mol%) to a vial charged with HBpin (174  $\mu\text{L}$ , 1.2 mmol) and DMF([alkyne]=0.8 M). The mixture was stirred for 5 mins. Alkyne (0.4 mmol) was added rapidly and the resulting mixture was stirred for 5 s -24 h. The reaction was then quenched by adding water. 20 mL EtOAc was added and the organic phase was washed with 10 mL brine twice to remove most of DMF. Pure product was isolated by column chromatography over silica gel deactivated with 2%  $\text{NEt}_3$  in petroleum ether using petroleum ether/EtOAc as the eluent.

**General procedure C:** In a nitrogen atmosphere, a vial was charged with  $\text{Co}(\text{acac})_2$  (5.1 mg, 0.02 mmol, 5 mol%),  $\text{CNC-}^i\text{Pr}$  (12.8 mg, 0.028 mmol),  $^t\text{BuOK}$  (12.6 mg, 0.112 mmol) dissolved in dry DMF (1 mL). The mixture was stirred for 5 mins followed by adding HBpin (174  $\mu\text{L}$ , 1.2 mmol). the mixture was stirred for further 5 mins and alkynes (0.4 mmol) was added rapidly. the resulting mixture was stirred for 5 s -24 h. The reaction was then quenched by adding water. 20 mL EtOAc was added and the organic phase was washed with 10 mL brine twice to remove most of DMF. Pure product was isolated by column chromatography over silica gel deactivated with 2%  $\text{NEt}_3$  in petroleum ether using petroleum ether/EtOAc as the eluent.

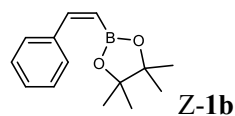

(Z)-4,4,5,5-tetramethyl-2-styryl-1,3,2-dioxaborolane (**Z-1b**): The title compound was prepared following general procedure B (0.5 mol% of [Co]), the reaction mixture was stirred for 5 min before quenched. Purification by flash column chromatography on silica gel (eluent: petroleum ether → petroleum ether/EtOAc = 20/1) afforded the product as a pale yellow oil in 92% yield (80.7 mg, Z:E > 99:1).

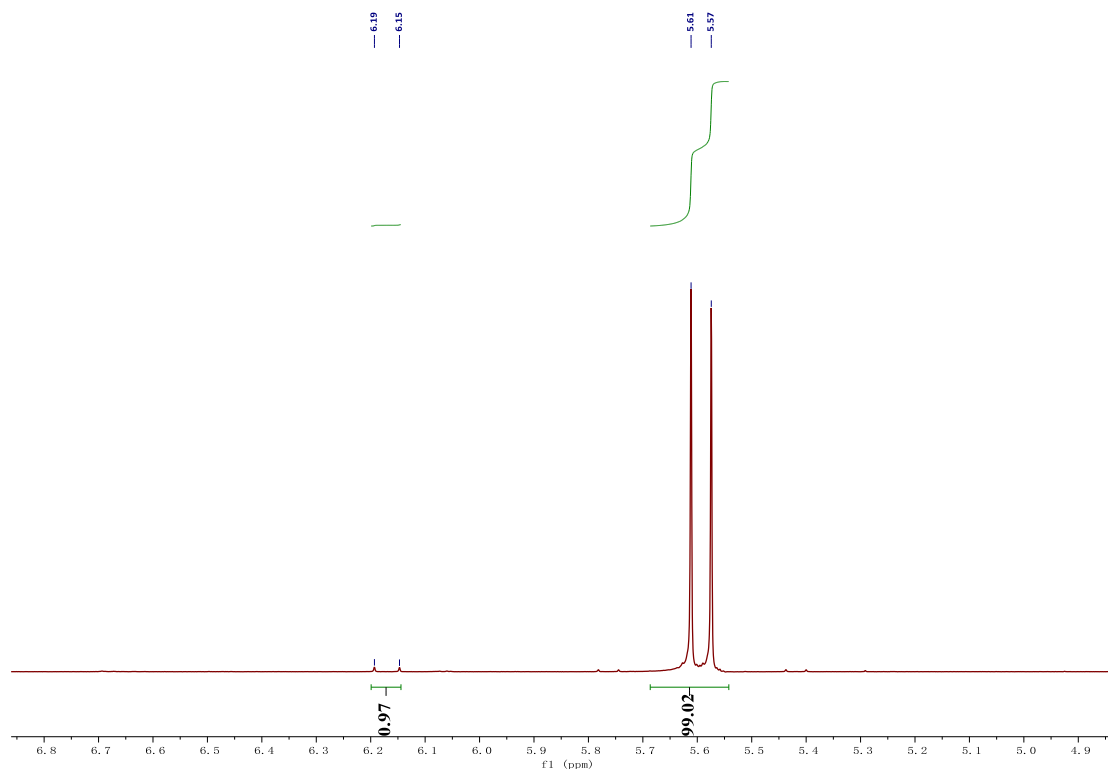

Z/E ratio of **Z-1b**

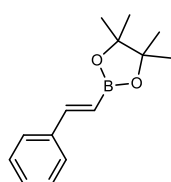

**E-1b**

(E)-4,4,5,5-tetramethyl-2-styryl-1,3,2-dioxaborolane (**E-1b**): The title compound was prepared following general procedure B (0.5 mol% of [Co]), the reaction mixture was stirred for 24 h before quenched. Purification by flash column chromatography on silica gel (eluent: petroleum ether → petroleum ether/EtOAc = 20/1) afforded the product as a pale yellow oil in 97% yield (89.3 mg, E:Z > 99:1). [See spectrum](#)

<sup>1</sup>H NMR (400 MHz, Chloroform-*d*) δ 7.49 (d, *J* = 6.9 Hz, 2H), 7.40 (d, *J* = 18.5 Hz, 1H), 7.36 – 7.26 (m, 3H), 6.17 (d, *J* = 18.4 Hz, 1H), 1.32 (s, 12H).

<sup>1</sup>H NMR spectra are consistent with previously reported data<sup>[21]</sup>.

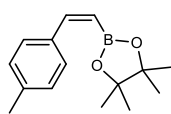

**Z-2b**

(Z)-4,4,5,5-tetramethyl-2-(4-methylstyryl)-1,3,2-dioxaborolane (**Z-2b**): The title compound was

prepared following general procedure B (1 mol% of [Co]), the reaction mixture was stirred for 5 s before quenched. DBM was added as internal standard and NMR yield (>99%) was obtained. Purification by flash column chromatography on silica gel (eluent: petroleumether→ petroleumether/EtOAc =20/1) afforded the product as a pale yellow oil in 83% yield (80.4 mg, Z:E=98:2).

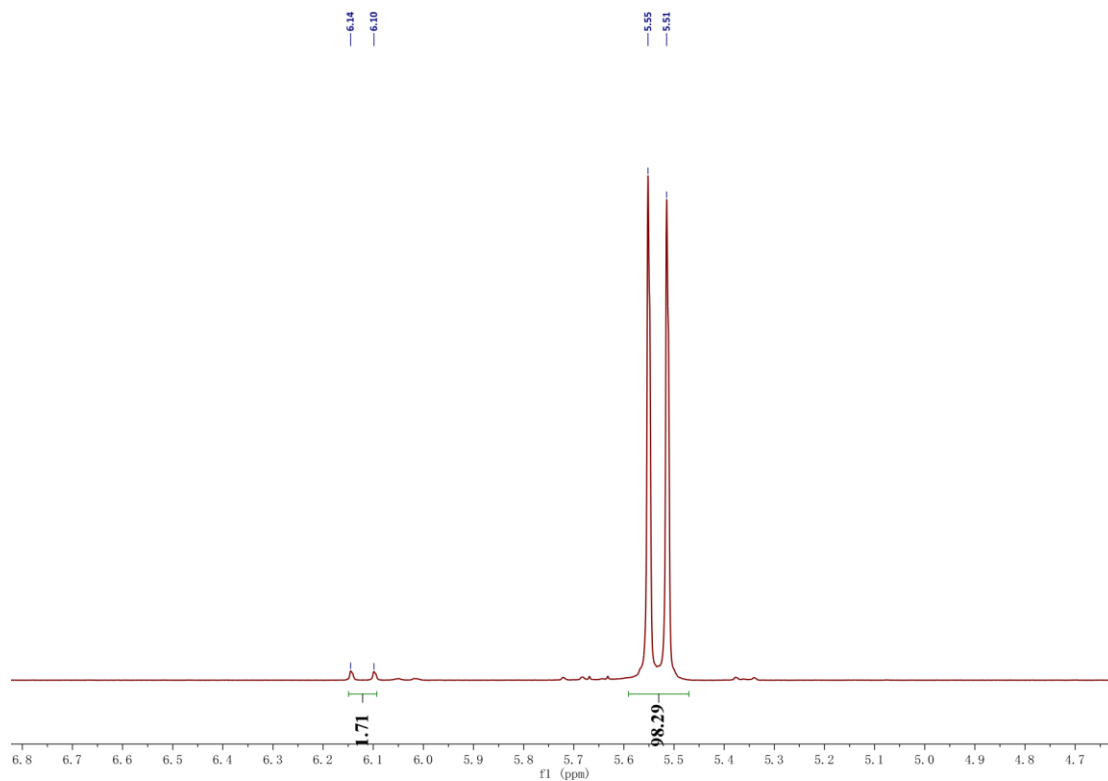

Z/E ratio of Z-2b

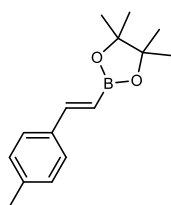

E-2b

(E)-4,4,5,5-tetramethyl-2-(4-methylstyryl)-1,3,2-dioxaborolane (E-2b): The title compound was prepared following general procedure B (1 mol% of [Co]), the reaction mixture was stirred for 24 h before quenched. Purification by flash column chromatography on silica gel (eluent: petroleumether→ petroleumether/EtOAc =20/1) afforded the product as a pale yellow oil in 93% yield (88.3 mg, E:Z>99:1). [See spectrum](#)

<sup>1</sup>H NMR (400 MHz, Chloroform-*d*) δ 7.48 – 7.34 (m, 3H), 7.14 (d, *J* = 8.0 Hz, 2H), 6.12 (d, *J* = 18.5 Hz, 1H), 2.35 (s, 3H), 1.32 (s, 12H).

<sup>1</sup>H NMR spectra are consistent with previously reported data<sup>[21]</sup>.

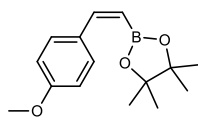

Z-3b

(Z)-2-(4-methoxystyryl)-4,4,5,5-tetramethyl-1,3,2-dioxaborolane (**Z-3b**): The title compound was prepared following general procedure B (0.5 mol% of [Co]), the reaction mixture was stirred for 5 s before quenched. DBM was added as internal standard and NMR yield (>99%) was obtained. Purification by flash column chromatography on silica gel (eluent: petroleum ether → petroleum ether/EtOAc = 20/1) afforded the product as a pale yellow oil in 92% yield (96.0 mg, Z:E=97:3). TOF = 132480 h<sup>-1</sup>

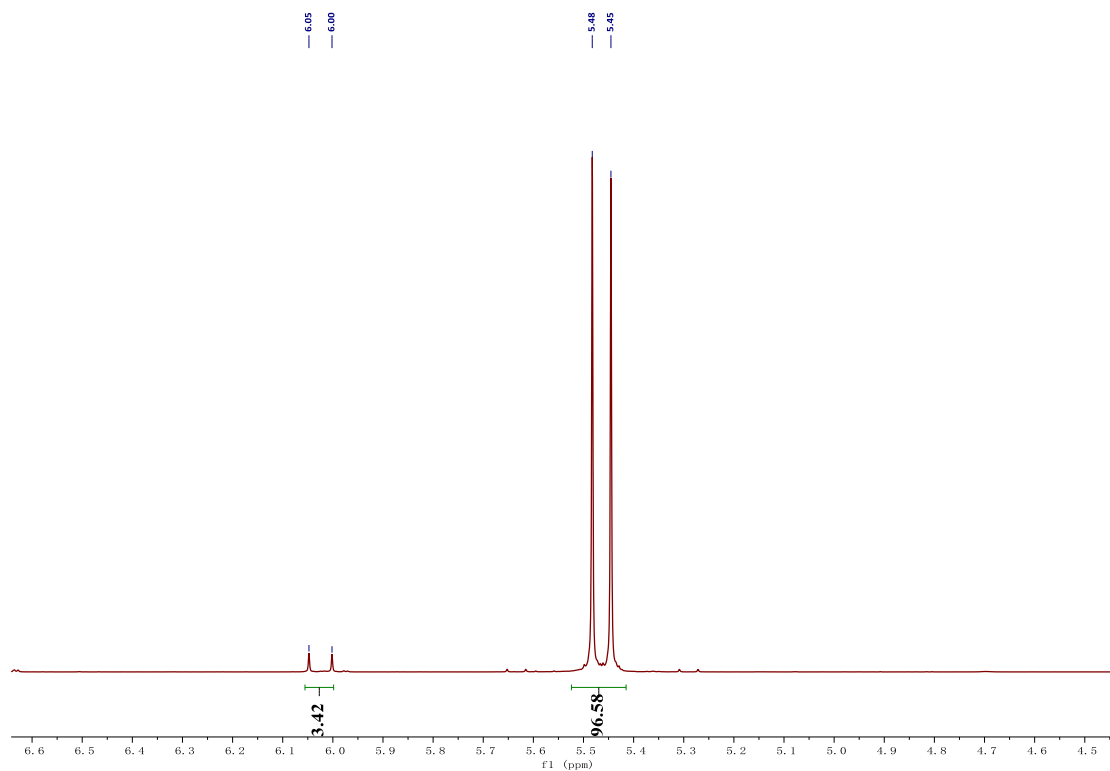

Z/E ratio of **Z-3b**

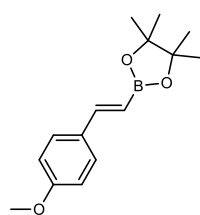

**E-3b**

(E)-4,4,5,5-tetramethyl-2-(4-methylstyryl)-1,3,2-dioxaborolane (**E-3b**): The title compound was prepared following general procedure B (0.5 mol% of [Co]), the reaction mixture was stirred for 24 h before quenched. Purification by flash column chromatography on silica gel (eluent: petroleum ether → petroleum ether/EtOAc = 20/1) afforded the product as a pale yellow oil in 92% yield (95.0 mg, E:Z>99:1). [See spectrum](#)

<sup>1</sup>H NMR (400 MHz, Chloroform-*d*) δ 7.43 (d, *J* = 8.7 Hz, 2H), 7.35 (d, *J* = 18.4 Hz, 1H), 6.85 (d, *J* = 8.7 Hz, 2H), 6.01 (d, *J* = 18.4 Hz, 1H), 3.79 (s, 3H), 1.30 (s, 12H).

<sup>1</sup>H NMR spectra are consistent with previously reported data<sup>[21]</sup>.



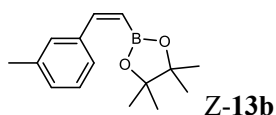

(Z)-4,4,5,5-tetramethyl-2-(3-methylstyryl)-1,3,2-dioxaborolane (**Z-13b**): The title compound was prepared following general procedure B (0.5 mol% of [Co]), the reaction mixture was stirred for 5 s before quenched. DBM was added as internal standard and NMR yield (>69%) was obtained. Purification by flash column chromatography on silica gel (eluent: petroleum ether → petroleum ether/EtOAc =20/1) afforded the product as a pale yellow oil in 63% yield (80.0 mg, Z:E>99:1).

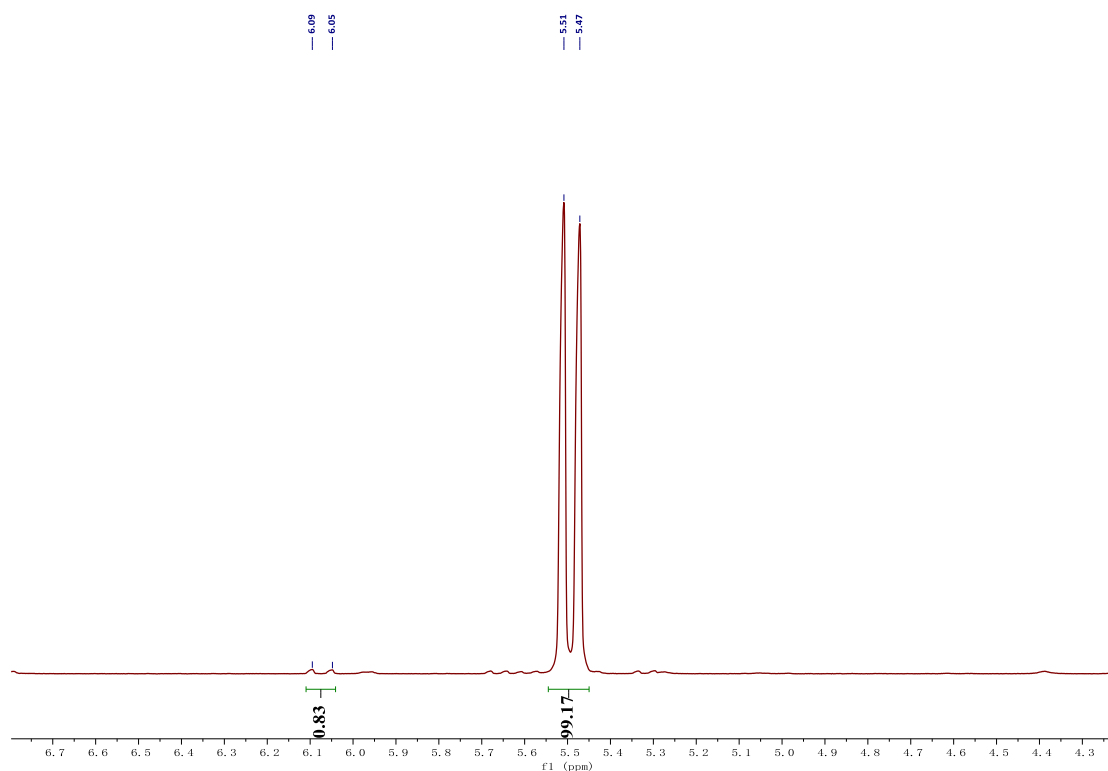

Z/E ratio of **Z-13b**

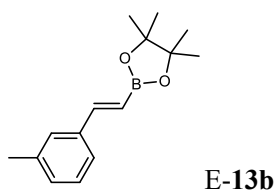

(E)-4,4,5,5-tetramethyl-2-(4-methylstyryl)-1,3,2-dioxaborolane (**E-13b**): The title compound was prepared following general procedure B (0.5 mol% of [Co]), the reaction mixture was stirred for 24 h before quenched. Purification by flash column chromatography on silica gel (eluent: petroleum ether → petroleum ether/EtOAc =20/1) afforded the product as a pale yellow oil in 93% yield (89.3mg, E:Z>99:1). [See spectrum](#)

<sup>1</sup>H NMR (400 MHz, Chloroform-*d*) δ 7.30 (d, *J* = 18.4 Hz, 1H), 7.21 (d, *J* = 5.6 Hz, 2H), 7.14 (t, *J* = 7.8 Hz, 1H), 7.02 (d, *J* = 7.5 Hz, 1H), 6.07 (d, *J* = 18.4 Hz, 1H), 2.26 (s, 3H), 1.22 (s, 12H).  
<sup>1</sup>H NMR spectra are consistent with previously reported data<sup>[21]</sup>.

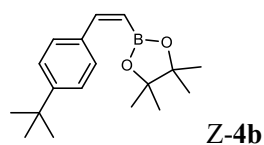

(*Z*)-2-(4-(tert-butyl)styryl)-4,4,5,5-tetramethyl-1,3,2-dioxaborolane (**Z-4b**): The title compound was prepared following general procedure C (5 mol% of [Co]), the reaction mixture was stirred for 3 mins before quenched. DBM was added as internal standard and NMR yield (>98%) was obtained. Purification by flash column chromatography on silica gel (eluent: petroleum ether → petroleum ether/EtOAc = 20/1) afforded the product as a pale yellow oil in 94% yield (107.6 mg, Z:E>99:1).

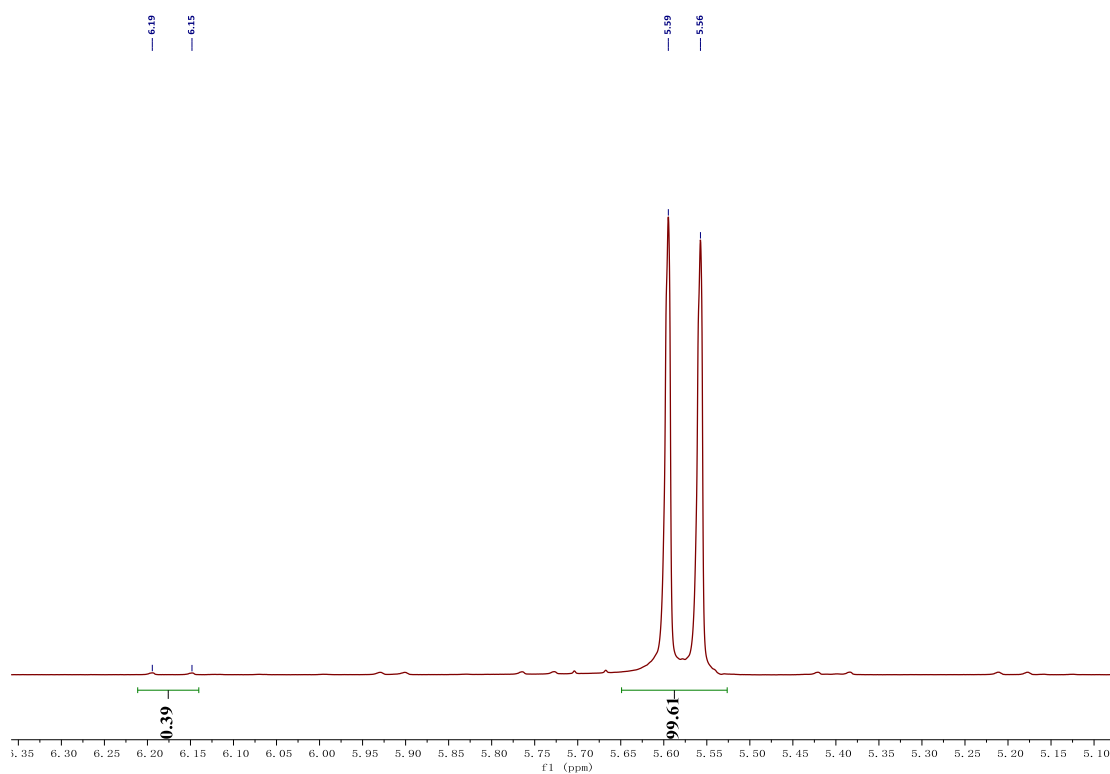

Z/E ratio of **Z-4b**

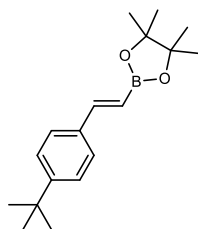

**E-4b**

(E)-2-(4-(tert-butyl)styryl)-4,4,5,5-tetramethyl-1,3,2-dioxaborolane (**E-4b**): The title compound was prepared following general procedure C (5 mol% of [Co]), the reaction mixture was stirred for 24 h before quenched. Purification by flash column chromatography on silica gel (eluent: petroleum ether → petroleum ether/EtOAc = 20/1) afforded the product as a pale yellow oil in 82% yield (91.6 mg, E:Z > 99:1). [See spectrum](#)

$^1\text{H NMR}$  (400 MHz, Chloroform-*d*)  $\delta$  7.46 – 7.34 (m, 5H), 6.12 (d,  $J = 18.4$  Hz, 1H), 1.32 (s, 21H).

$^1\text{H NMR}$  spectra are consistent with previously reported data<sup>[22]</sup>.

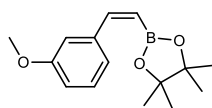

**Z-14b**

(Z)-2-(3-methoxystyryl)-4,4,5,5-tetramethyl-1,3,2-dioxaborolane (**Z-14b**): The title compound was prepared following general procedure C (5 mol% of [Co]), the reaction mixture was stirred for 5 mins before quenched. Purification by flash column chromatography on silica gel (eluent: petroleum ether → petroleum ether/EtOAc = 20/1) afforded the product as a pale yellow oil in 80% yield (76.7 mg, Z:E = 92:8).

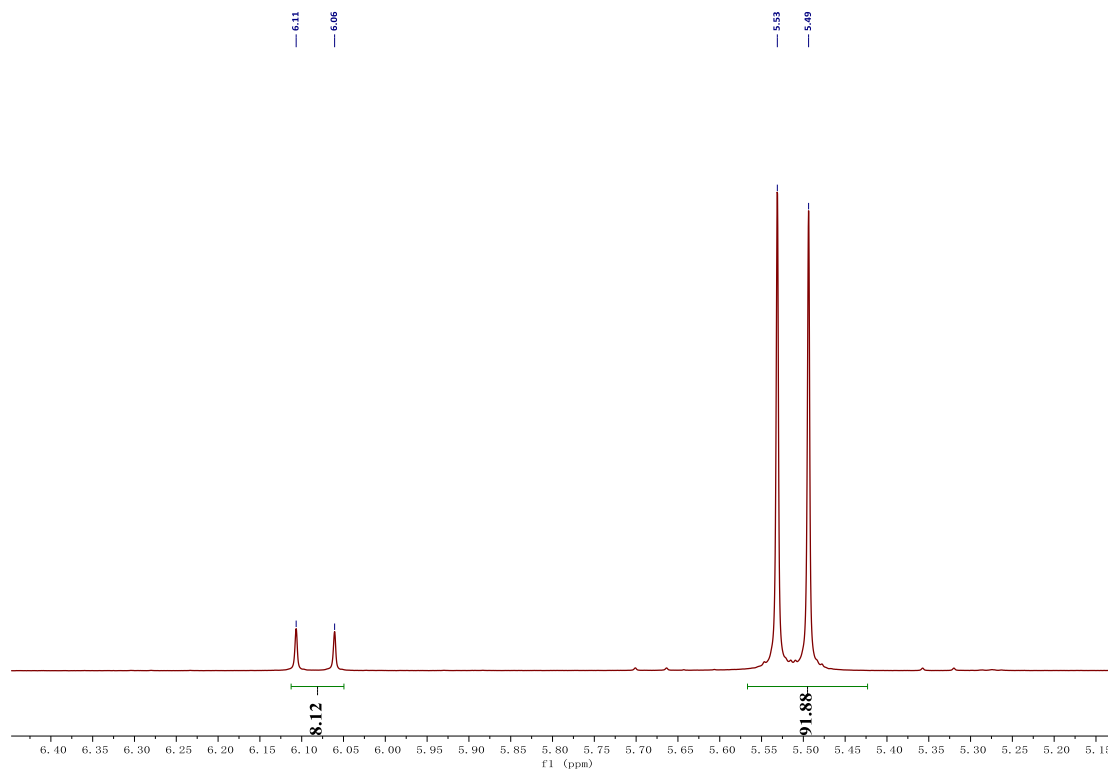

### Z/E ratio of Z-14b

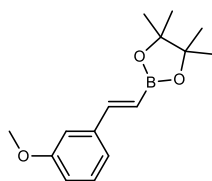

**E-14b**

(E)-2-(3-methoxystyryl)-4,4,5,5-tetramethyl-1,3,2-dioxaborolane (**E-14b**): The title compound was prepared following general procedure C (5 mol% of [Co]), the reaction mixture was stirred for 24 h before quenched. Purification by flash column chromatography on silica gel (eluent: petroleum ether → petroleum ether/EtOAc = 20/1) afforded the product as a pale yellow oil in 88% yield (86.9 mg, E:Z > 99:1). [See spectrum](#)

<sup>1</sup>H NMR (400 MHz, Chloroform-*d*) δ 7.29 (d, *J* = 18.4 Hz, 1H), 7.15 (t, *J* = 7.9 Hz, 1H), 6.99 (d, *J* = 7.7 Hz, 1H), 6.94 (s, 1H), 6.76 (d, *J* = 8.2 Hz, 1H), 6.07 (d, *J* = 18.4 Hz, 1H), 3.70 (s, 3H), 1.22 (s, 12H).

<sup>1</sup>H NMR spectra are consistent with previously reported data<sup>[21]</sup>.

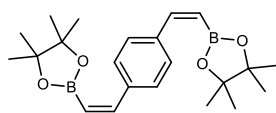

**Z-30b**

1,4-bis((Z)-2-(4,4,5,5-tetramethyl-1,3,2-dioxaborolan-2-yl)vinyl)benzene (**Z-30b**): The title compound was prepared following general procedure B (0.5 mol% of [Co], 0.2 mmol scale), the reaction mixture was stirred for 1 hour. DBM was added as internal standard and NMR yield (85%) was obtained. Purification by flash column chromatography on silica gel (eluent: petroleum ether → petroleum ether/EtOAc = 20/1) afforded the product as a white solid in 82% yield (62.2 mg, Z:E = 95:5).

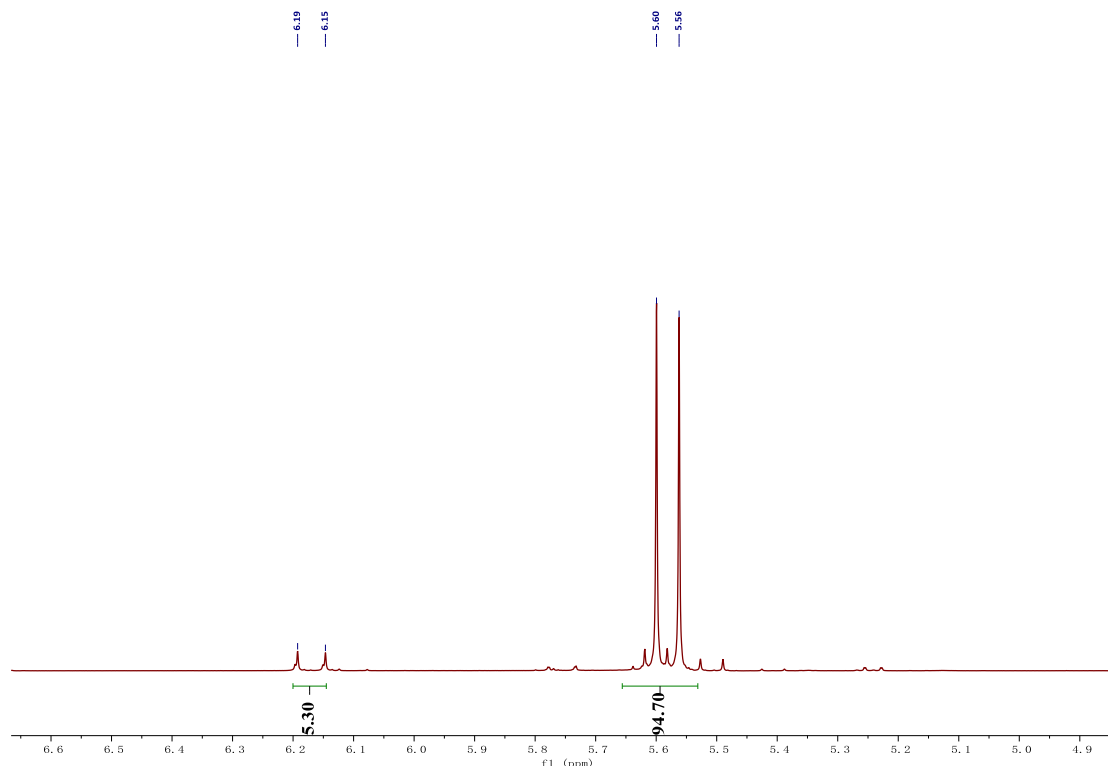

Z/E ratio of Z-30b

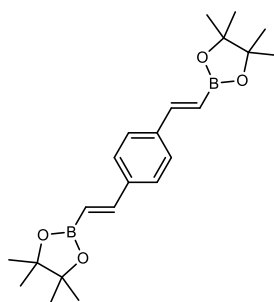

**E-30b**

1,4-bis((E)-2-(4,4,5,5-tetramethyl-1,3,2-dioxaborolan-2-yl)vinyl)benzene (**E-30b**): The title compound was prepared following general procedure B (0.5 mol% of [Co], 0.2 mmol scale), the reaction mixture was stirred for 24 h before quenched. DBM was added as internal standard and NMR yield (84%) was obtained. Purification by flash column chromatography on silica gel (eluent: petroleumether → petroleumether/EtOAc =20/1) afforded the product as a pale yellow oil in 76% yield (58.2 mg, E:Z>99:1). [See spectrum](#)

<sup>1</sup>H NMR (400 MHz, Chloroform-*d*) δ 7.45 (s, 4H), 7.37 (d, *J* = 18.4 Hz, 2H), 6.17 (d, *J* = 18.4 Hz, 2H), 1.31 (s, 24H).

<sup>1</sup>H NMR spectra are consistent with previously reported data<sup>[22]</sup>.

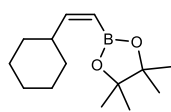

**Z-39b**

(Z)-2-(2-(2-cyclohexylvinyl)-4,4,5,5-tetramethyl-1,3,2-dioxaborolane (**Z-39b**): The title compound

was prepared following general procedure C (5 mol% of [Co]), the reaction mixture was stirred for 1 hours. DBM was added as internal standard and NMR yield (90%) was obtained. Purification by flash column chromatography on silica gel (eluent: petroleumether→ petroleumether/EtOAc =20/1) afforded the product as a white solid in 88% yield (83.1 mg, Z:E=98:2).

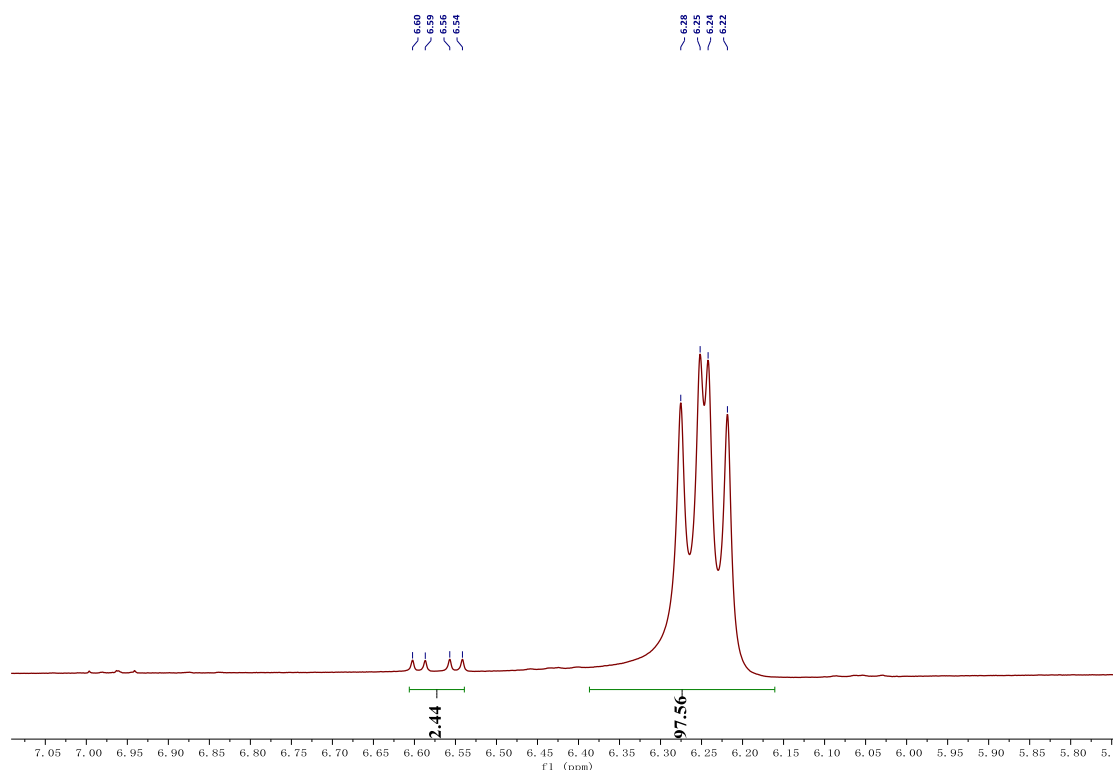

Z/E ratio of Z-39b

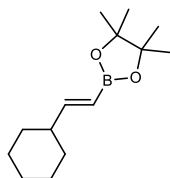

E-39b

(E)-2-(2-cyclohexylvinyl)-4,4,5,5-tetramethyl-1,3,2-dioxaborolane (E-39b): The title compound was prepared following general procedure B (0.5 mol% of [Co]), the reaction mixture was stirred for 24 h before quenched. DBM was added as internal standard and NMR yield (91%) was obtained. Purification by flash column chromatography on silica gel (eluent: petroleumether→ petroleumether/EtOAc =20/1) afforded the product as a pale yellow oil in 92% yield (58.2 mg, E:Z=97:3). [See spectrum](#)

<sup>1</sup>H NMR (400 MHz, Chloroform-*d*) δ 6.57 (dd, *J* = 18.2, 6.2 Hz, 1H), 5.37 (dd, *J* = 18.2, 1.4 Hz, 1H), 2.07-1.96 (m, 1H), 1.77-1.68 (m, 4H), 1.67 – 1.64 (m, 1H), 1.26 (s, 12H), -1.20 – 1.03 (m, 4H), 0.99 – 0.70 (m, 1H).

<sup>1</sup>H NMR spectra are consistent with previously reported data<sup>[21]</sup>.

## 5. Large scale reaction

**General procedure for large scale catalytic Z-selective hydroboration of terminal alkynes:** In nitrogen atmosphere, a 100 mL Schlenk vial was charged with alkyne (30 mmol) and dry DMF (20 mL), the alkyne solution was placed in an ice path. In another vial charged with Co(acac)<sub>2</sub> (38.6 mg, 0.15 mmol), CNC-iPr (96.0 mg, 0.21 mmol), <sup>t</sup>BuOK (94.3 mg, 0.84 mmol), dry DMF (15 mL) was stirred for 5 min and HBpin (5.6 mL, 39 mmol) was added and stirred for a further 5 min. The catalyst solution was added dropwise into the alkyne solution under ice bath during 10 mins. After that, ice bath was removed and the mixture was stirred at room temperature for a certain time. The reaction was then quenched by adding water. 300 mL EtOAc was added and the organic phase was washed with 3\*100 mL water and 2\*100 mL brine. the organic phase was passed through a short pad of silica gel. Pure product was obtained after removing volatiles under reduced pressure.

## 6. Mechanistic Study

### 6.1 Procedure for monitoring the hydroboration of phenylacetylene

In a nitrogen atmosphere, a vial was charged with Co(acac)<sub>2</sub> (4.1 mg, 0.016 mmol), CNC-iPr (10.2 mg, 0.022 mmol), <sup>t</sup>BuOK (10.1 mg, 0.09 mmol) dissolved in dry DMF (4 mL) and was stirred for 5 min. 500 μL of the freshly prepared stock solution of the *in situ* prepared active catalyst ([Co]=4.0 mM in DMF) was added via a micro-syringe (500 μL) to a vial charged with HBpin (116 μL, 0.8 mmol) and the mixture was stirred for 5 min. **1a** (0.4 mmol) was added rapidly. Periodically, an aliquot was removed from the vial and analyzed by GC-MS.

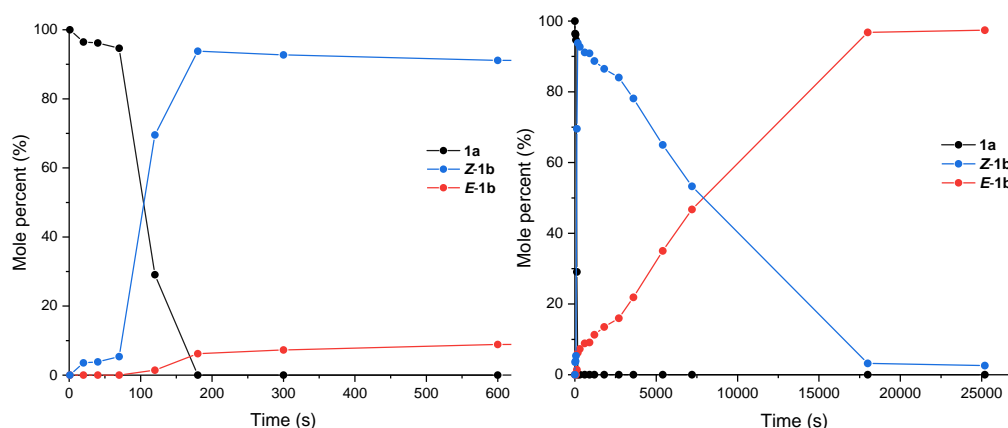

**Supplementary Figure 1.** Kinetic profile of the hydroboration of phenylacetylene (**1a**) with an equally distributed time axis

### 6.2 Procedure for kinetic experiments of catalyst concentration

In a nitrogen atmosphere, a vial was charged with Co(acac)<sub>2</sub> (4.1 mg, 0.016 mmol), CNC-iPr (10.2 mg, 0.022 mmol), <sup>t</sup>BuOK (10.1 mg, 0.09 mmol) dissolved in dry DMF (4 mL) and was stirred for 5 min. The freshly prepared stock solution of the *in situ* prepared active catalyst ([Co]=4.0 mM in DMF) was added via a micro-syringe (200 μL, 300 μL, 350 μL, 400 μL, 450 μL, 500 μL) to a vial charged with HBpin (174 μL, 1.2 mmol) and DMF (300 μL, 200 μL, 150 μL, 100 μL, 50 μL, 0 μL). The mixture was stirred for 5 min. Alkyne (0.4 mmol) was added rapidly. Periodically, an aliquot was removed from the vial and analyzed by GC-MS.

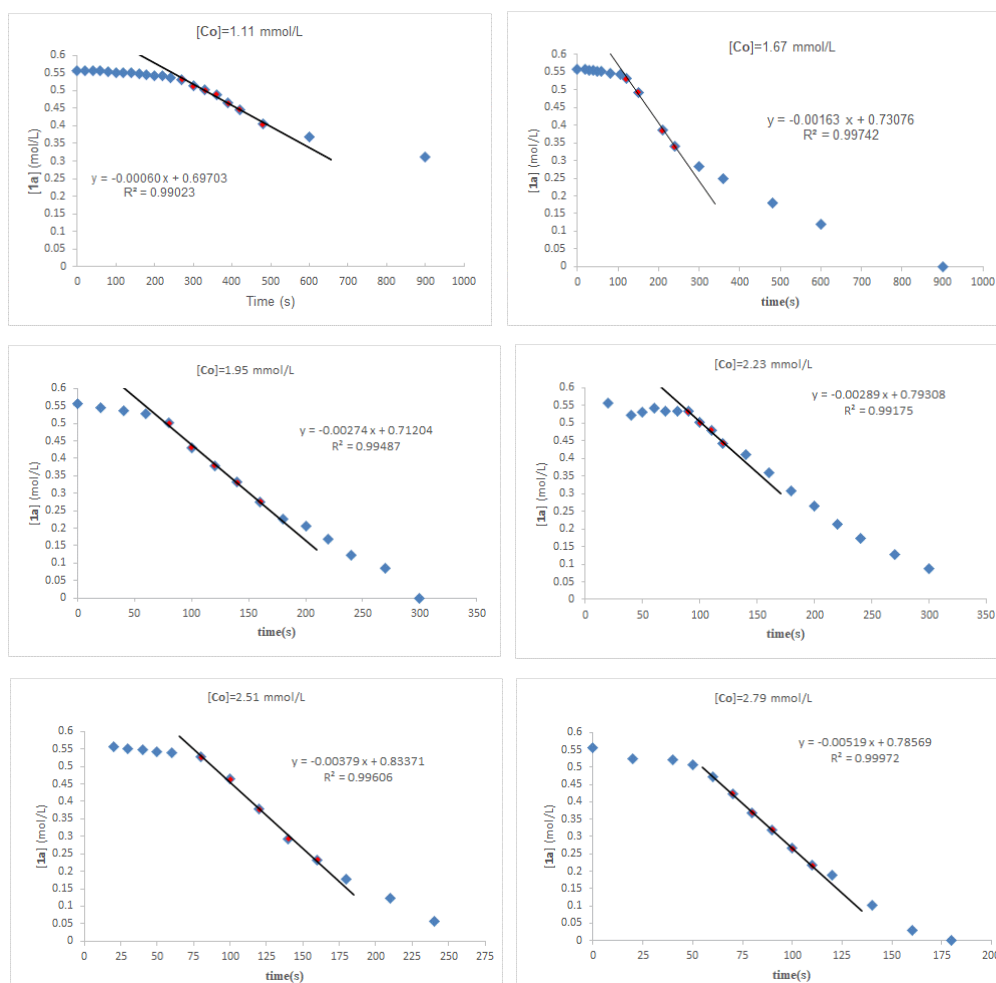

Supplementary Figure 2. The original kinetic data of **1a** with different cobalt concentrations.

### 6.3 Deuterium labeling experiments

#### Procedure for Z-selective hydroboration of **3a-d**:

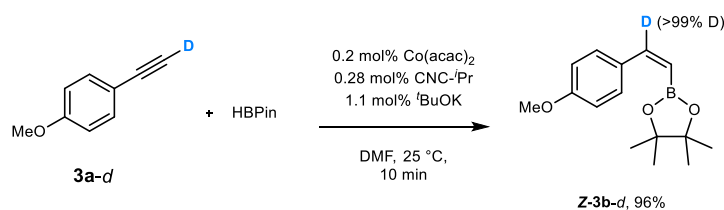

In nitrogen atmosphere, a vial was charged with  $\text{Co}(\text{acac})_2$  (4.1 mg, 0.016 mmol),  $\text{CNC-}i\text{Pr}$  (10.2 mg, 0.022 mmol),  $t\text{BuOK}$  (10.1 mg, 0.09 mmol) dissolved in dry DMF (4 mL) and was stirred for 5 min. The freshly prepared stock solution of the *in situ* prepared active catalyst ( $[\text{Co}] = 4.0$  mM in DMF) was added via a micro-syringe (200  $\mu\text{L}$ ) to a vial charged with HBpin (75  $\mu\text{L}$ , 0.52 mmol) and DMF (300  $\mu\text{L}$ ). The mixture was stirred for 5 mins. **3a-d** (0.4 mmol) was added rapidly and the resulting mixture was stirred for 10 min. The reaction was then quenched by adding water. 20 mL EtOAc was added and the organic phase was washed with 10 mL brine twice to remove most of DMF. Purification by flash column chromatography on silica gel (eluent: petroleum ether  $\rightarrow$  petroleum ether/EtOAc = 20/1) over silica gel deactivated with 2%  $\text{NEt}_3$  afforded the product as a pale yellow oil in 96% yield (100.3 mg, Z:E=98:2).



$^1\text{H NMR}$  (400 MHz,  $\text{CDCl}_3$ )  $\delta$  7.55 (d,  $J = 8.7$  Hz, 2H), 6.84 (d,  $J = 8.7$  Hz, 2H), 5.45 (s, 1H), 3.82 (s, 3H), 1.30 (s, 12H).

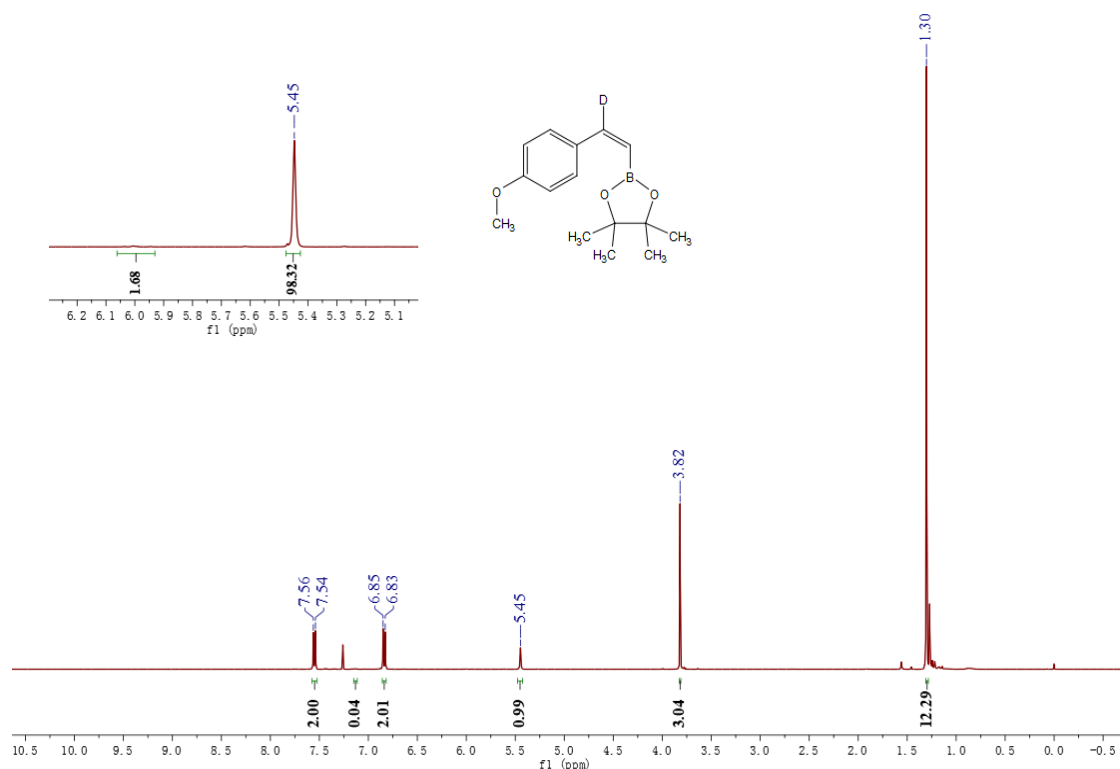

Supplementary Figure 3  $^1\text{H NMR}$  of *Z*-3b-*d*

**Procedure for isomerization of *Z*-3b-*d*:**

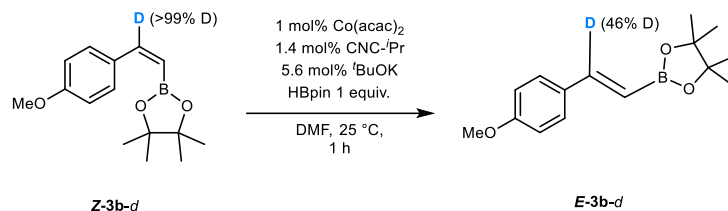

In a nitrogen atmosphere, a vial was charged with  $\text{Co}(\text{acac})_2$  (4.1 mg, 0.016 mmol),  $\text{CNC-}^i\text{Pr}$  (10.2 mg, 0.022 mmol),  $^t\text{BuOK}$  (10.1 mg, 0.09 mmol) dissolved in dry DMF (2 mL) and was stirred for 5 mins. The freshly prepared stock solution of the *in situ* prepared active catalyst ( $[\text{Co}] = 8.0$  mM in DMF) was added via a micro-syringe (500  $\mu\text{L}$ ) to a vial charged with HBpin (58  $\mu\text{L}$ , 0.4 mmol). The mixture was stirred for 5 mins. *Z*-3b-*d* (0.4 mmol) was added rapidly and the resulting mixture was stirred for 1 h. The reaction was then quenched by adding water. 20 mL EtOAc was added and the organic phase was washed with 10 mL brine twice to remove most of DMF. Purification by flash column chromatography on silica gel (eluent: petroleum ether  $\rightarrow$  petroleum ether/EtOAc = 20/1) over silica gel deactivated with 2%  $\text{NEt}_3$  afforded the product as a pale yellow oil in 77% yield (80.4 mg, *Z*:*E*=98:2).

$^1\text{H NMR}$  (600 MHz,  $\text{Chloroform-}d$ )  $\delta$  7.43 (d,  $J = 7.8$  Hz, 2H), 7.35 (d,  $J = 18.2$  Hz, 0.46 H), 6.86 (d,  $J = 7.5$  Hz, 2H), 6.01 (d,  $J = 15.4$  Hz, 1H), 3.80 (s, 3H), 1.30 (s, 12H).

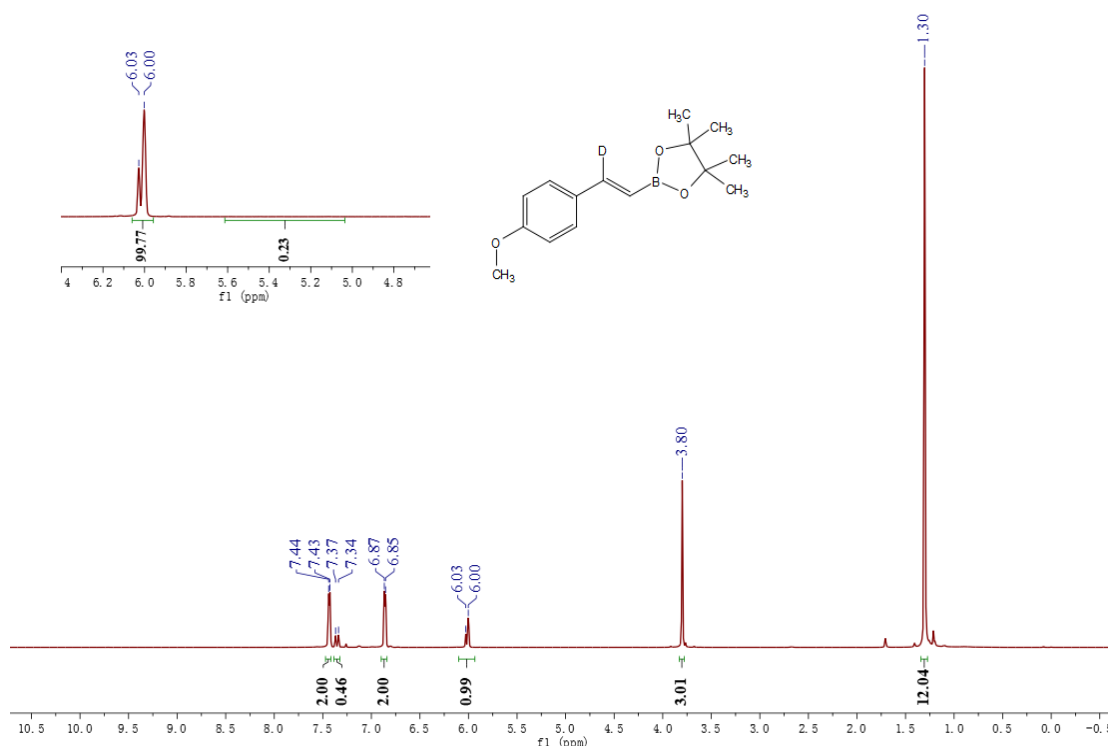

Supplementary Figure 4  $^1\text{H}$  NMR of *E*-3b-d

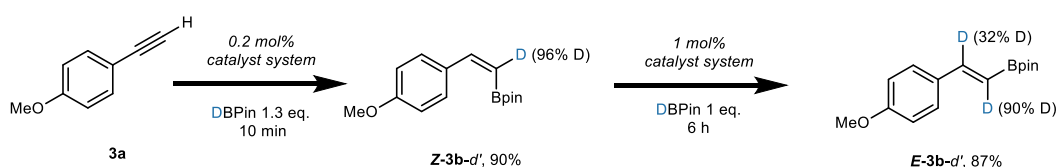

Supplementary Figure 5 Deuterium labeling experiments with DBPin

**Procedure for *Z*-selective hydroboration of **3a** with DBPin:**

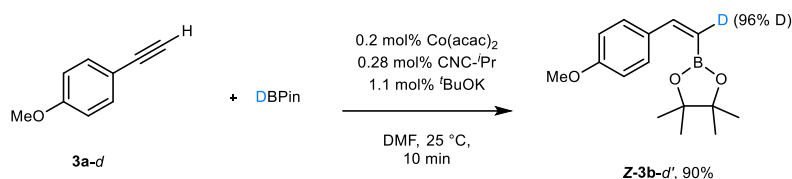

In a nitrogen atmosphere, a vial was charged with  $\text{Co}(\text{acac})_2$  (4.1 mg, 0.016 mmol), CNC-iPr (10.2 mg, 0.022 mmol),  $t\text{BuOK}$  (10.1 mg, 0.09 mmol) dissolved in dry DMF (4 mL) and was stirred for 5 min. The freshly prepared stock solution of the *in situ* prepared active catalyst ( $[\text{Co}] = 4.0$  mM in DMF) was added via a micro-syringe (200  $\mu\text{L}$ ) to a vial charged with DBPin (75  $\mu\text{L}$ , 0.52 mmol) and DMF (300  $\mu\text{L}$ ). The mixture was stirred for 5 mins. **3a** (0.4 mmol) was added rapidly and the resulting mixture was stirred for 10 min. The reaction was then quenched by adding water. 20 mL EtOAc was added and the organic phase was washed with 10 mL brine twice to remove most of DMF. Purification by flash column chromatography on silica gel (eluent: petroleum ether  $\rightarrow$  petroleum ether/EtOAc = 20/1) over silica gel deactivated with 2%  $\text{NEt}_3$  afforded the product as a colorless oil in 90% yield (94.1 mg, *Z*:*E* > 99:1).

**<sup>1</sup>H NMR** (400 MHz, CDCl<sub>3</sub>) δ 7.55 (d, *J* = 8.7 Hz, 2H), 7.15 (s, 1H), 6.84 (d, *J* = 8.8 Hz, 2H), 3.82 (s, 3H), 1.30 (s, 12H).

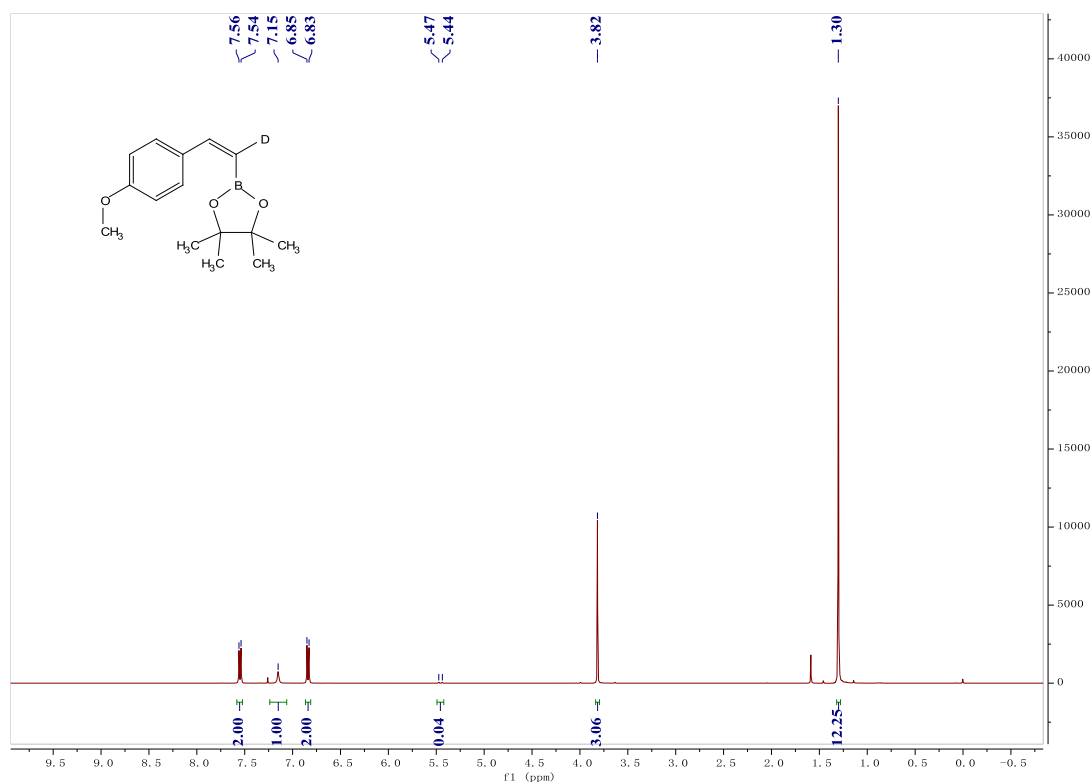

**Supplementary Figure 6** <sup>1</sup>H NMR of *Z*-**3b-d'**

**Procedure for isomerization of *Z*-**3b-d'** with DBpin:**

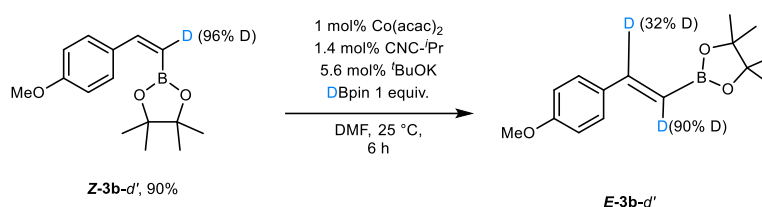

In a nitrogen atmosphere, a vial was charged with Co(acac)<sub>2</sub> (4.1 mg, 0.016 mmol), CNC-<sup>*i*</sup>Pr (10.2 mg, 0.022 mmol), <sup>*t*</sup>BuOK (10.1 mg, 0.09 mmol) dissolved in dry DMF (2 mL) and was stirred for 5 mins. The freshly prepared stock solution of the *in situ* prepared active catalyst ([Co]=8.0 mM in DMF) was added via a micro-syringe (500 μL) to a vial charged with DBpin (58 μL, 0.4 mmol). The mixture was stirred for 5 mins. *Z*-**3b-d'** (0.4 mmol) was added rapidly and the resulting mixture was stirred for 6 h. The reaction was then quenched by adding water. 20 mL EtOAc was added and the organic phase was washed with 10 mL brine twice to remove most of DMF. Purification by flash column chromatography on silica gel (eluent: petroleum ether → petroleum ether/EtOAc =20/1) over silica gel deactivated with 2% NEt<sub>3</sub> afforded the product as a pale yellow oil in 87% yield (91.3 mg, *Z*:*E*>99:1).

**<sup>1</sup>H NMR** (400 MHz, Chloroform-*d*) δ 7.46 (d, *J* = 8.7 Hz, 2H), 7.37 (s, 1H), 6.89 (d, *J* = 8.7 Hz, 2H), 3.83 (s, 3H), 1.33 (s, 12H).

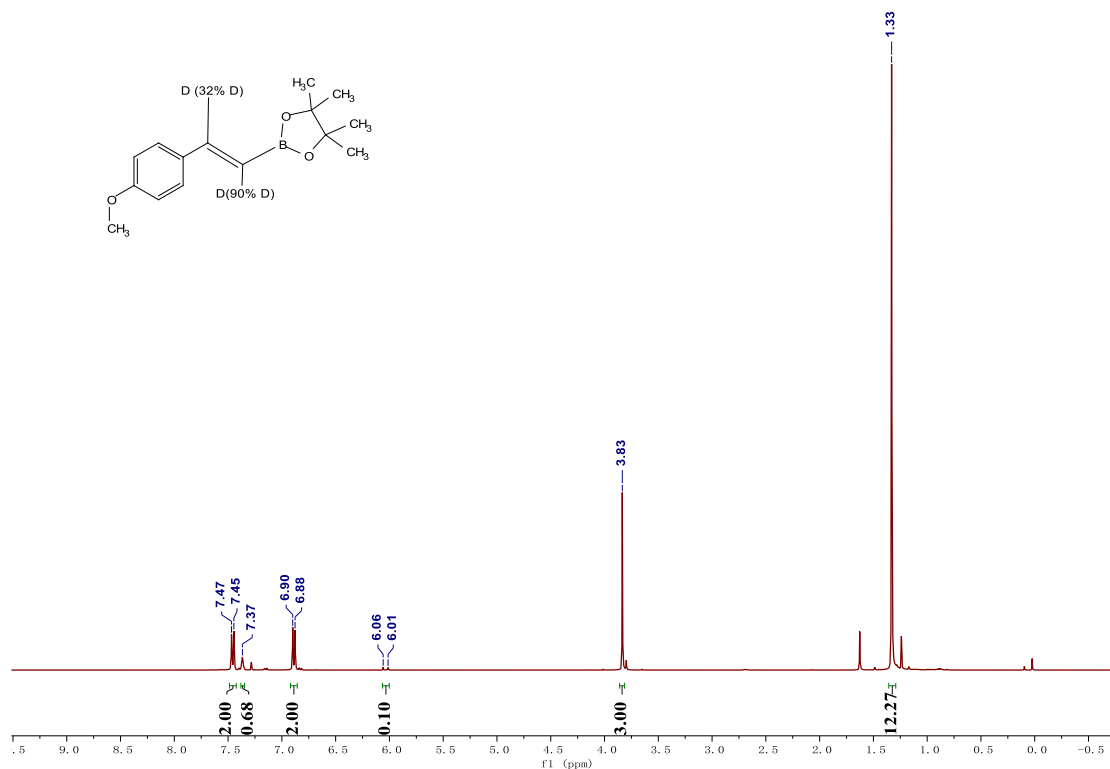

Supplementary Figure 7  $^1\text{H}$  NMR of *E*-**3b-d'**

**Procedure for competition experiment:**

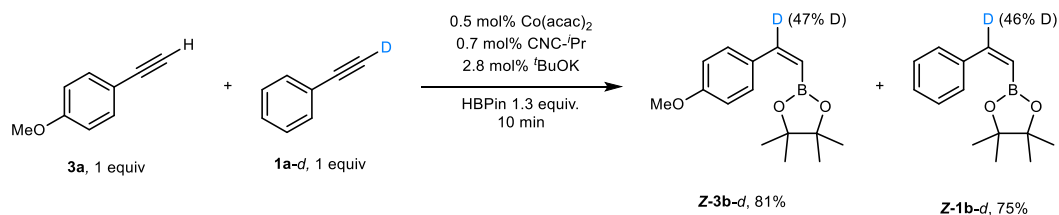

In a nitrogen atmosphere, a vial was charged with  $\text{Co}(\text{acac})_2$  (4.1 mg, 0.016 mmol),  $\text{CNC-iPr}$  (10.2 mg, 0.022 mmol),  $t\text{BuOK}$  (10.1 mg, 0.09 mmol) dissolved in dry DMF (4 mL) and was stirred for 5 mins. The freshly prepared stock solution of the *in situ* prepared active catalyst ( $[\text{Co}] = 4.0$  mM in DMF) was added via a micro-syringe (500  $\mu\text{L}$ ) to a vial charged with HBpin (75  $\mu\text{L}$ , 0.52 mmol). The mixture was stirred for 5 mins. A mixture of **1a-d** (0.2 mmol) and **3a** (0.2 mmol) was added rapidly and the resulting mixture was stirred for 10 min. The reaction was then quenched by adding water. 20 mL EtOAc was added and the organic phase was washed with 10 mL brine twice to remove most of DMF. Purification by flash column chromatography on silica gel (eluent: petroleum ether  $\rightarrow$  petroleum ether/EtOAc = 20/1) over silica gel deactivated with 2%  $\text{NEt}_3$  afforded the **Z-3b-d** in 81% yield and **Z-1b-d** in 75% yield.

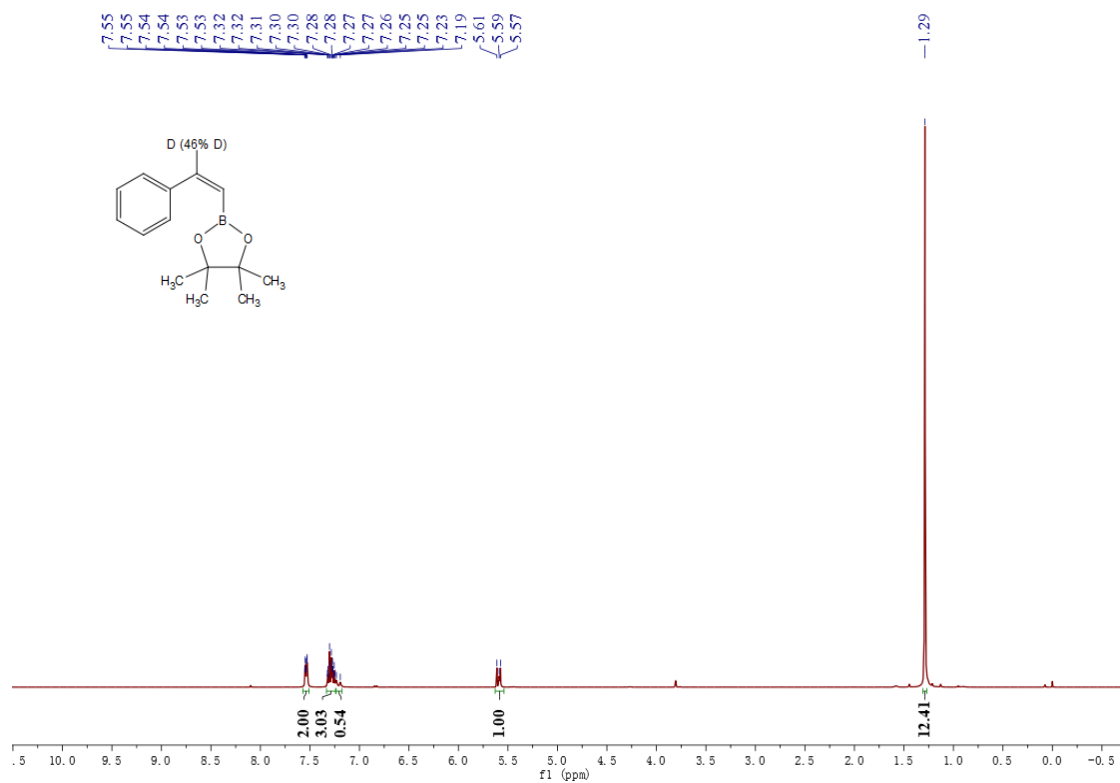

**Supplementary Figure 8**  $^1\text{H}$  NMR of Z-1b-d

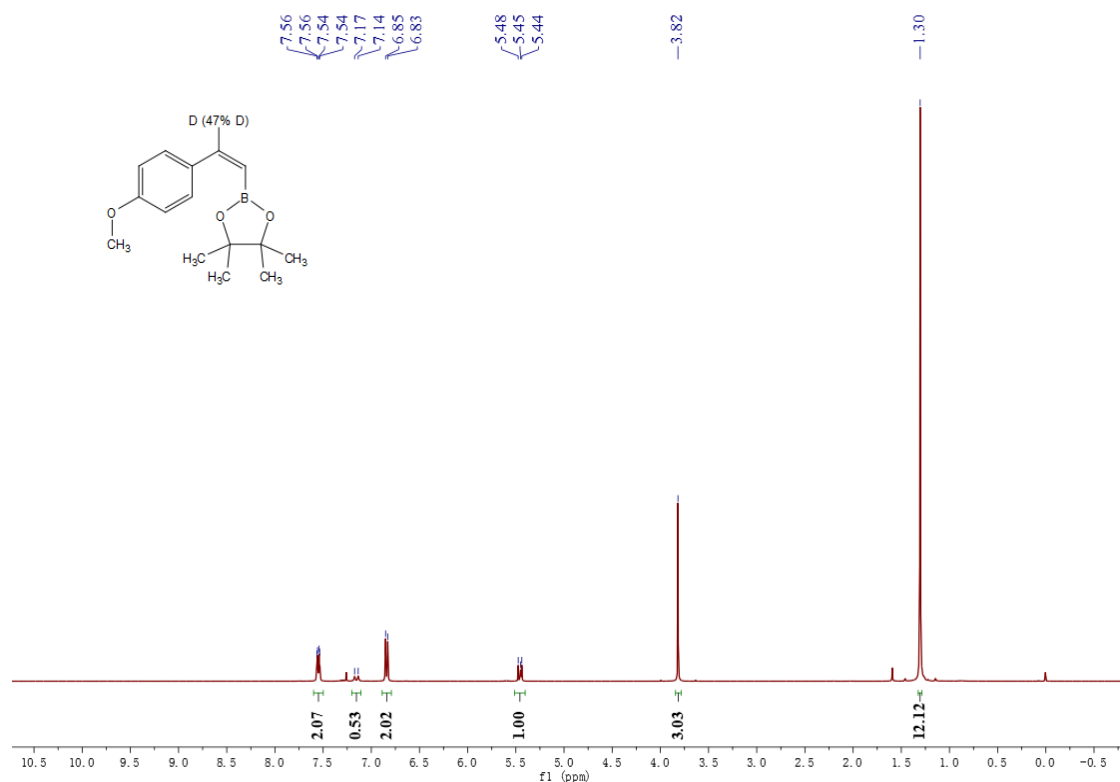

**Supplementary Figure 9**  $^1\text{H}$  NMR of Z-3b-d

## 6.4 Kinetic isotope effects experiment:

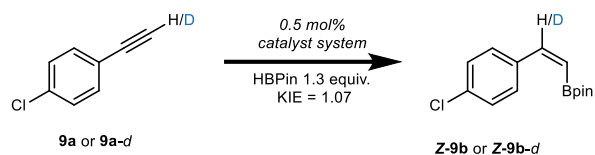

In a nitrogen atmosphere, a vial was charged with  $\text{Co}(\text{acac})_2$  (4.1 mg, 0.016 mmol),  $\text{CNC-}i\text{Pr}$  (10.2 mg, 0.022 mmol),  $t\text{BuOK}$  (10.1 mg, 0.09 mmol) dissolved in dry DMF (4 mL) and was stirred for 5 min. The freshly prepared stock solution of the *in situ* prepared active catalyst ( $[\text{Co}] = 4.0 \text{ mM}$  in DMF) was added via a micro-syringe (500  $\mu\text{L}$ ) to a vial charged with HBpin (0.52 mmol). The mixture was stirred for 5 min. **9a** or **9a-d** (0.4 mmol) was added rapidly. Periodically, an aliquot was removed from the vial and analyzed by GC-MS. The amount of the alkynes was traced (**Supplementary Figure 10**).

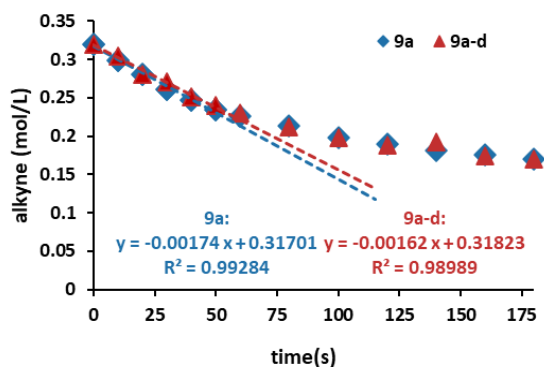

**Supplementary Figure 10** Kinetic profile of the hydroboration of **9a** and **9a-d**

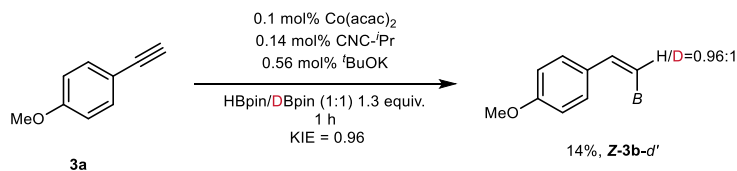

In a nitrogen atmosphere, a vial was charged with  $\text{Co}(\text{acac})_2$  (4.1 mg, 0.016 mmol),  $\text{CNC-}i\text{Pr}$  (10.2 mg, 0.022 mmol),  $t\text{BuOK}$  (10.1 mg, 0.09 mmol) dissolved in dry DMF (4 mL) and was stirred for 5 mins. The freshly prepared stock solution of the *in situ* prepared active catalyst ( $[\text{Co}] = 4.0 \text{ mM}$  in DMF) was added via a micro-syringe (100  $\mu\text{L}$ ) to a vial charged with H/D-Bpin (H:D=1:1, 0.52 mmol) and DMF (400  $\mu\text{L}$ ). The mixture was stirred for 5 mins. **3a** (0.4 mmol) was added rapidly and the resulting mixture was stirred for 1 h. The reaction was then quenched by adding water. 20 mL EtOAc was added and the organic phase was washed with 10 mL brine twice to remove most of DMF. Purification by flash column chromatography on silica gel (eluent: petroleum ether  $\rightarrow$  petroleum ether/EtOAc = 20/1) over silica gel deactivated with 2%  $\text{NEt}_3$  afforded the product as a pale yellow oil in 22% yield (22.6 mg, Z:E=98:2).

$^1\text{H NMR}$  (600 MHz,  $\text{Chloroform-}d$ )  $\delta$  7.54 (d,  $J = 8.5 \text{ Hz}$ , 2H), 7.15 (t,  $J = 7.0 \text{ Hz}$ , 1H), 6.84 (d,  $J = 8.0 \text{ Hz}$ , 2H), 5.45 (d,  $J = 14.9 \text{ Hz}$ , 0.49H), 3.82 (s, 3H), 1.30 (s, 12H).

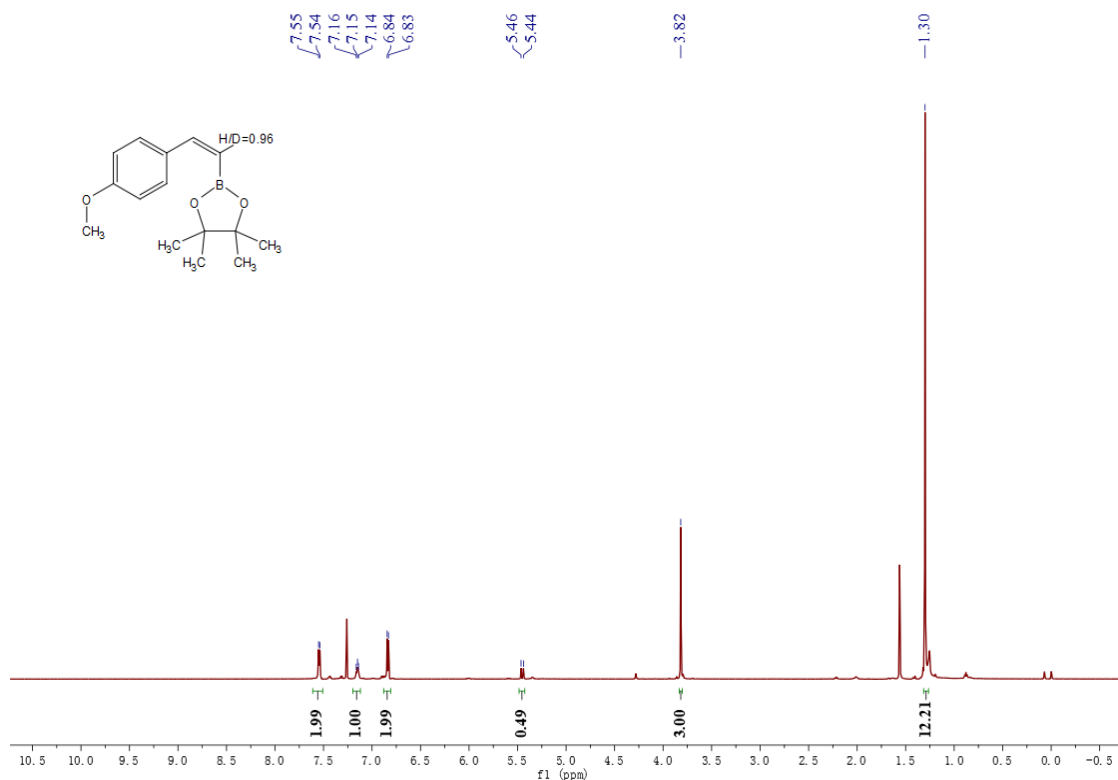

Supplementary Figure 11  $^1\text{H}$  NMR of Z-3b-d'

### 6.5 Inhabitation experiment with inert alkyne:

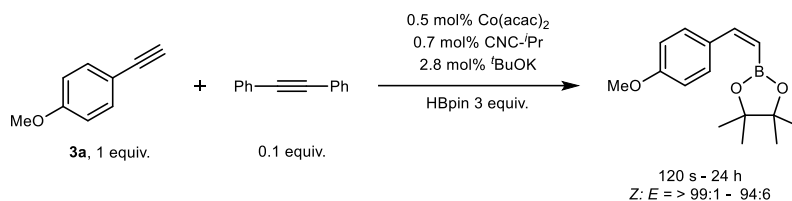

In a nitrogen atmosphere, a vial was charged with  $\text{Co}(\text{acac})_2$  (4.1 mg, 0.016 mmol),  $\text{CNC-}^i\text{Pr}$  (10.2 mg, 0.022 mmol),  $^t\text{BuOK}$  (10.1 mg, 0.09 mmol) dissolved in dry DMF (4 mL) and was stirred for 5 mins. The freshly prepared stock solution of the *in situ* prepared active catalyst ( $[\text{Co}] = 4.0$  mM in DMF) was added via a micro-syringe (500  $\mu\text{L}$ ) to a vial charged with HBpin (174  $\mu\text{L}$ , 1.2 mmol) and diphenylacetylene (7.1 mg, 0.04 mmol). The mixture was stirred for 5 mins. **3a** (0.4 mmol) was added rapidly. Periodically, an aliquot was removed from the vial and analyzed by GC-MS.

### 6.6 Kinetic trace of Z-selective products:

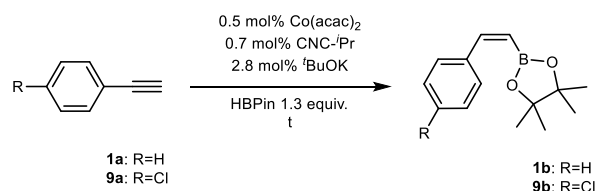

In a nitrogen atmosphere, a vial was charged with  $\text{Co}(\text{acac})_2$  (4.1 mg, 0.016 mmol),  $\text{CNC-}^i\text{Pr}$  (10.2 mg, 0.022 mmol),  $^t\text{BuOK}$  (10.1 mg, 0.09 mmol) dissolved in dry DMF (4 mL) and was stirred for 5 mins. The freshly prepared stock solution of the *in situ* prepared active catalyst ( $[\text{Co}] = 4.0$  mM in DMF) was added via a micro-syringe (500  $\mu\text{L}$ ) to a vial charged with HBpin (174  $\mu\text{L}$ , 1.2 mmol).

The mixture was stirred for 5 mins. **1a** (0.4 mmol) or **9a** (0.4 mmol) or a mixture of **1a** (0.2 mmol) and **9a** (0.2 mmol) was added rapidly. Periodically, an aliquot was removed from the vial and analyzed by GC-MS.

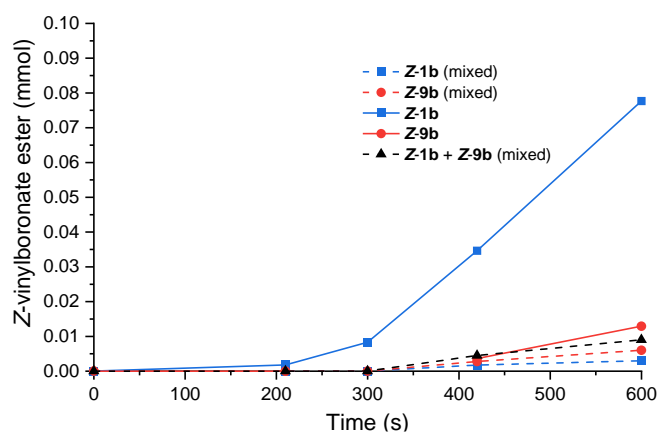

Supplementary Figure 12 The first 600 seconds of Fig. 5c

### 6.7 HRMS of in situ formed (CNC-<sup>*i*</sup>Pr)Co(II) complex:

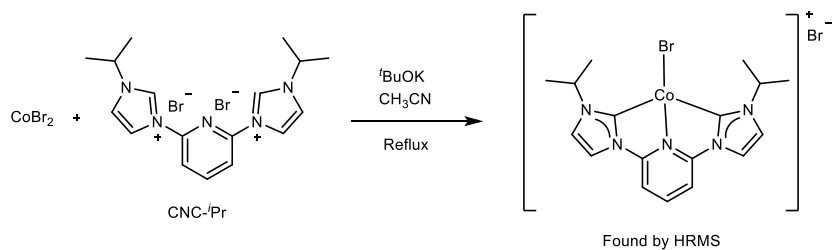

In a nitrogen atmosphere, a vial was charged with  $\text{CoBr}_2$  (4.37 mg, 0.02 mmol), CNC-<sup>*i*</sup>Pr (10.2 mg, 0.022 mmol), <sup>*t*</sup>BuOK (10.1 mg, 0.09 mmol) dissolved in dry acetonitrile and was stirred under 80 °C. After cooling down, the mixture was filtrated and the residue was washed with acetonitrile, pentane. A grass green solid was obtained after dried in vacuo. The solid was dissolved in DMF and HRMS(APCI<sup>+</sup>) showed a (CNC-<sup>*i*</sup>Pr)Co(II) complex was formed.



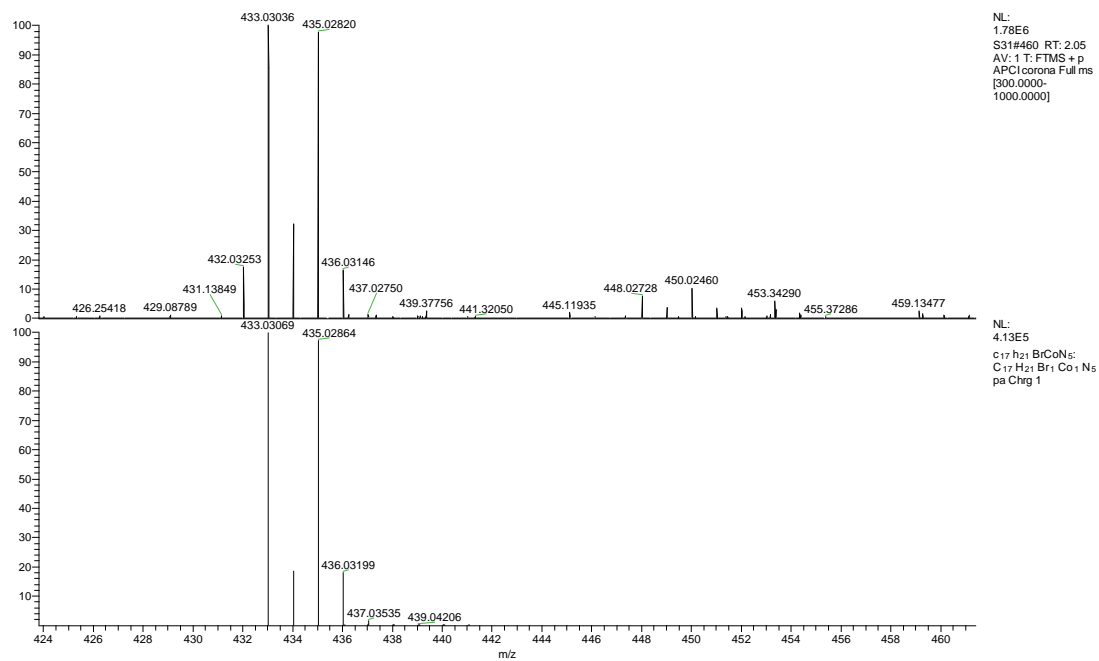

Supplementary Figure 13 HRMS(APCI+) of (CNC-iPr)Co(II) complex founded(up) and calculated(down)

## 6.8 Single crystal of (CNC-<sup>*i*</sup>Pr)<sub>2</sub>Co(III) complex

Method A: Single-crystals of (CNC-<sup>*i*</sup>Pr)<sub>2</sub>Co(III)Br<sub>3</sub> suitable for X-ray diffraction were obtained by slow vapor diffusion of diethyl ether into a 200  $\mu$ L MeOH solution of the aforementioned grass green solid for two weeks\*. The X-ray diffraction structure is shown in Supplementary Figure 14. See also the data in Supplementary Table 13-15. The X-ray crystallographic coordinate for the structure reported has been deposited at the Cambridge Crystallographic Data Centre (CCDC), under deposition number CCDC 2288260. No CheckCif file A- or B-level alerts was found.

\* Note: the Co(III) complex crystal can also be obtained using alternative solvent systems such as EtOAc/DMF or EtOAc/DMSO.

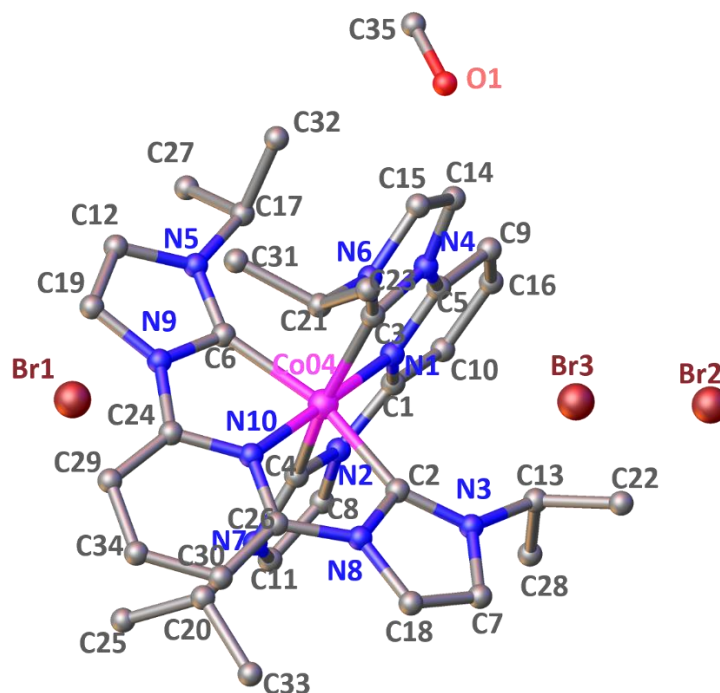

Supplementary Figure 14 X-ray structure of (CNC-<sup>*i*</sup>Pr)<sub>2</sub>CoBr<sub>3</sub> complex. Hydrogen atoms are omitted for clarity.

Supplementary Table 13 Crystal data and structure refinement for (CNC-<sup>*i*</sup>Pr)<sub>2</sub>Co(III)Br<sub>3</sub>

| Identification code    | (CNC- <sup><i>i</i></sup> Pr) <sub>2</sub> Co(III)Br <sub>3</sub>   |
|------------------------|---------------------------------------------------------------------|
| Empirical formula      | C <sub>35</sub> H <sub>46</sub> Br <sub>3</sub> CoN <sub>10</sub> O |
| Formula weight         | 921.48                                                              |
| Temperature/K          | 250.00(10)                                                          |
| Crystal system         | monoclinic                                                          |
| Space group            | P2 <sub>1</sub> /n                                                  |
| a/ $\text{\AA}$        | 10.34180(10)                                                        |
| b/ $\text{\AA}$        | 22.2032(2)                                                          |
| c/ $\text{\AA}$        | 16.6291(2)                                                          |
| $\alpha$ / $^\circ$    | 90                                                                  |
| $\beta$ / $^\circ$     | 96.1060(10)                                                         |
| $\gamma$ / $^\circ$    | 90                                                                  |
| Volume/ $\text{\AA}^3$ | 3796.73(7)                                                          |
| Z                      | 4                                                                   |

|                                                |                                                               |
|------------------------------------------------|---------------------------------------------------------------|
| $\rho_{\text{calc}}/\text{cm}^3$               | 1.612                                                         |
| $\mu/\text{mm}^{-1}$                           | 7.587                                                         |
| F(000)                                         | 1864                                                          |
| Crystal size/ $\text{mm}^3$                    | $0.2 \times 0.15 \times 0.15$                                 |
| Radiation                                      | CuK $\alpha$ ( $\lambda = 1.54184$ )                          |
| 2 $\theta$ range for data collection/ $^\circ$ | 6.666 to 144.846                                              |
| Index ranges                                   | $-12 \leq h \leq 12, -21 \leq k \leq 27, -20 \leq l \leq 20$  |
| Reflections collected                          | 21911                                                         |
| Independent reflections                        | 7394 [ $R_{\text{int}} = 0.0669, R_{\text{sigma}} = 0.0469$ ] |
| Data/restraints/parameters                     | 7394/6/461                                                    |
| Goodness-of-fit on $F^2$                       | 1.065                                                         |
| Final R indexes [ $I \geq 2\sigma(I)$ ]        | $R_1 = 0.0683, W_{R_2} = 0.1858$                              |
| Final R indexes [all data]                     | $R_1 = 0.0742, W_{R_2} = 0.1934$                              |
| Largest diff. peak/hole / $e \text{ \AA}^{-3}$ | 1.86/-1.33                                                    |

**Supplementary Table 14** Bond Lengths for (CNC-<sup>i</sup>Pr)<sub>2</sub>Co(III)Br<sub>3</sub>

| Atom | Atom | Length/ $\text{\AA}$ | Atom | Atom | Length/ $\text{\AA}$ |
|------|------|----------------------|------|------|----------------------|
| Co04 | N1   | 1.893(3)             | N8   | C26  | 1.389(7)             |
| Co04 | N10  | 1.895(4)             | N9   | C6   | 1.363(6)             |
| Co04 | C2   | 1.961(4)             | N9   | C19  | 1.391(6)             |
| Co04 | C3   | 1.968(5)             | N9   | C24  | 1.402(7)             |
| Co04 | C4   | 1.977(5)             | N10  | C24  | 1.339(7)             |
| Co04 | C6   | 1.965(4)             | N10  | C26  | 1.347(7)             |
| N1   | C1   | 1.335(5)             | C1   | C10  | 1.382(6)             |
| N1   | C5   | 1.340(5)             | C5   | C9   | 1.376(6)             |
| N2   | C1   | 1.390(5)             | C7   | C18  | 1.326(7)             |
| N2   | C4   | 1.377(5)             | C8   | C11  | 1.333(7)             |
| N2   | C8   | 1.395(6)             | C9   | C16  | 1.360(7)             |
| N3   | C2   | 1.331(5)             | C10  | C16  | 1.392(7)             |
| N3   | C7   | 1.408(6)             | C12  | C19  | 1.350(8)             |
| N3   | C13  | 1.489(6)             | C13  | C22  | 1.519(8)             |
| N4   | C3   | 1.376(6)             | C13  | C28  | 1.517(8)             |
| N4   | C5   | 1.398(5)             | C14  | C15  | 1.339(7)             |
| N4   | C14  | 1.383(6)             | C17  | C27  | 1.516(8)             |
| N5   | C6   | 1.337(6)             | C17  | C32  | 1.504(8)             |
| N5   | C12  | 1.390(6)             | C20  | C25  | 1.507(7)             |
| N5   | C17  | 1.477(6)             | C20  | C33  | 1.504(8)             |
| N6   | C3   | 1.340(6)             | C21  | C23  | 1.514(9)             |
| N6   | C15  | 1.387(7)             | C21  | C31  | 1.518(9)             |
| N6   | C21  | 1.500(6)             | C24  | C29  | 1.395(8)             |
| N7   | C4   | 1.335(6)             | C26  | C30  | 1.401(8)             |
| N7   | C11  | 1.398(7)             | C29  | C34  | 1.387(10)            |
| N7   | C20  | 1.482(6)             | C30  | C34  | 1.404(10)            |
| N8   | C2   | 1.372(5)             | O1   | C35  | 1.314(17)            |
| N8   | C18  | 1.389(6)             |      |      |                      |

**Supplementary Table 15** Bond Angles for (CNC-<sup>i</sup>Pr)<sub>2</sub>Co(III)Br<sub>3</sub>

| Atom | Atom | Atom | Angle/°    | Atom | Atom | Atom | Angle/°  |
|------|------|------|------------|------|------|------|----------|
| N1   | Co04 | N10  | 177.98(18) | N3   | C2   | Co04 | 143.1(3) |
| N1   | Co04 | C2   | 100.80(16) | N3   | C2   | N8   | 104.5(4) |
| N1   | Co04 | C3   | 80.47(16)  | N8   | C2   | Co04 | 112.1(3) |
| N1   | Co04 | C4   | 80.38(16)  | N4   | C3   | Co04 | 111.8(3) |
| N1   | Co04 | C6   | 98.69(16)  | N6   | C3   | Co04 | 144.2(3) |
| N10  | Co04 | C2   | 80.19(17)  | N6   | C3   | N4   | 103.6(4) |
| N10  | Co04 | C3   | 101.25(19) | N2   | C4   | Co04 | 111.2(3) |
| N10  | Co04 | C4   | 97.89(19)  | N7   | C4   | Co04 | 144.5(3) |
| N10  | Co04 | C6   | 80.34(17)  | N7   | C4   | N2   | 104.1(4) |
| C2   | Co04 | C3   | 94.08(18)  | N1   | C5   | N4   | 110.1(3) |
| C2   | Co04 | C4   | 89.88(18)  | N1   | C5   | C9   | 121.8(4) |
| C2   | Co04 | C6   | 160.52(18) | C9   | C5   | N4   | 128.1(4) |
| C3   | Co04 | C4   | 160.85(17) | N5   | C6   | Co04 | 143.2(3) |
| C6   | Co04 | C3   | 89.30(18)  | N5   | C6   | N9   | 104.7(4) |
| C6   | Co04 | C4   | 93.19(18)  | N9   | C6   | Co04 | 111.7(3) |
| C1   | N1   | Co04 | 120.1(3)   | C18  | C7   | N3   | 107.9(4) |
| C1   | N1   | C5   | 119.7(3)   | C11  | C8   | N2   | 105.4(4) |
| C5   | N1   | Co04 | 120.1(3)   | C16  | C9   | C5   | 117.4(4) |
| C1   | N2   | C8   | 130.6(4)   | C1   | C10  | C16  | 115.8(4) |
| C4   | N2   | C1   | 117.9(4)   | C8   | C11  | N7   | 108.2(4) |
| C4   | N2   | C8   | 111.4(4)   | C19  | C12  | N5   | 108.3(4) |
| C2   | N3   | C7   | 110.4(4)   | N3   | C13  | C22  | 109.6(4) |
| C2   | N3   | C13  | 126.0(4)   | N3   | C13  | C28  | 110.1(4) |
| C7   | N3   | C13  | 123.5(4)   | C28  | C13  | C22  | 112.6(5) |
| C3   | N4   | C5   | 117.5(4)   | C15  | C14  | N4   | 105.2(4) |
| C3   | N4   | C14  | 111.9(4)   | C14  | C15  | N6   | 108.2(4) |
| C14  | N4   | C5   | 130.4(4)   | C9   | C16  | C10  | 122.6(4) |
| C6   | N5   | C12  | 110.4(4)   | N5   | C17  | C27  | 110.6(4) |
| C6   | N5   | C17  | 125.7(4)   | N5   | C17  | C32  | 109.8(5) |
| C12  | N5   | C17  | 123.9(4)   | C32  | C17  | C27  | 109.9(5) |
| C3   | N6   | C15  | 111.0(4)   | C7   | C18  | N8   | 105.7(4) |
| C3   | N6   | C21  | 125.4(4)   | C12  | C19  | N9   | 104.6(4) |
| C15  | N6   | C21  | 123.6(4)   | N7   | C20  | C25  | 111.0(4) |
| C4   | N7   | C11  | 110.9(4)   | N7   | C20  | C33  | 110.7(5) |
| C4   | N7   | C20  | 126.4(4)   | C33  | C20  | C25  | 111.0(5) |
| C11  | N7   | C20  | 122.7(4)   | N6   | C21  | C23  | 109.3(5) |
| C2   | N8   | C18  | 111.4(4)   | N6   | C21  | C31  | 109.8(5) |
| C2   | N8   | C26  | 117.7(4)   | C23  | C21  | C31  | 111.8(5) |
| C26  | N8   | C18  | 129.9(4)   | N10  | C24  | N9   | 109.2(4) |
| C6   | N9   | C19  | 111.9(4)   | N10  | C24  | C29  | 123.1(6) |
| C6   | N9   | C24  | 118.0(4)   | C29  | C24  | N9   | 127.5(5) |
| C19  | N9   | C24  | 130.0(4)   | N8   | C26  | C30  | 127.1(6) |
| C24  | N10  | Co04 | 119.8(3)   | N10  | C26  | N8   | 109.5(4) |
| C24  | N10  | C26  | 119.2(5)   | N10  | C26  | C30  | 122.5(6) |
| C26  | N10  | Co04 | 119.9(3)   | C34  | C29  | C24  | 116.6(6) |
| N1   | C1   | N2   | 110.3(3)   | C26  | C30  | C34  | 116.3(6) |
| N1   | C1   | C10  | 122.6(4)   | C29  | C34  | C30  | 122.0(6) |
| C10  | C1   | N2   | 127.0(4)   |      |      |      |          |

Method B: In a nitrogen atmosphere, a vial was charged with  $\text{Co}(\text{acac})_2$  (4.37 mg, 0.02 mmol),  $\text{CNC-}^i\text{Pr}$  (10.2 mg, 0.022 mmol),  $^t\text{BuOK}$  (10.1 mg, 0.09 mmol) dissolved in dry DMF. Single-crystals of  $(\text{CNC-}^i\text{Pr})_2\text{Co}(\text{III})\text{Br}_3$  suitable for X-ray diffraction were obtained by slow vapor diffusion of toluene into the DMF solution. HRMS of  $(\text{CNC-}^i\text{Pr})_2\text{Co}(\text{III})$  was also collected as shown in Supplementary Figure 15. The collected  $(\text{CNC-}^i\text{Pr})_2\text{Co}(\text{III})\text{Br}_3$  crystals, totaling less than 0.5 mg, were utilized for catalyzing the transformation of **1a**, showing promising catalytic activity similar to the model reaction (Supplementary Figure 16).

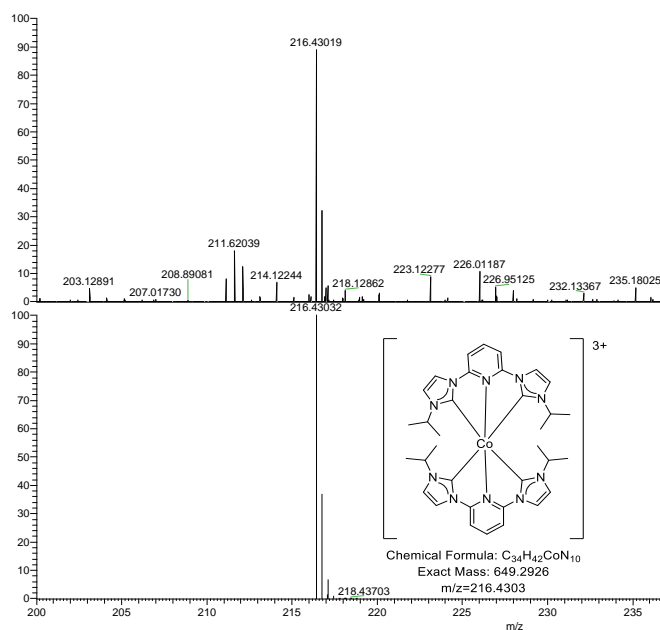

Supplementary Figure 15 HRMS of  $(\text{CNC-}^i\text{Pr})_2\text{Co}(\text{III})$

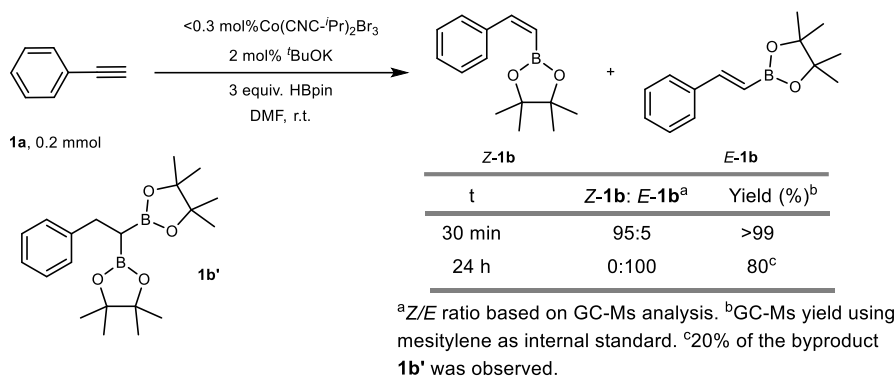

Supplementary Figure 16 Catalytic performance of  $(\text{CNC-}^i\text{Pr})_2\text{CoBr}_3$

## 6.9 HRMS of in situ formed $(\text{CNC-}^i\text{Pr})\text{Co}(\text{I})\text{H}$ complex:

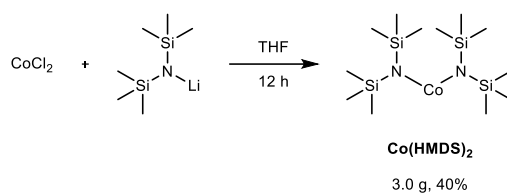

**Preparation of Co(HMDS)<sub>2</sub>:** The title compound was synthesized according to a reported procedure with modifications<sup>[23]</sup>. LiHMDS (1 M in THF, 40 mmol) was added to a vigorously stirred suspension of CoCl<sub>2</sub> (2.6 g, 20 mmol) in THF (40 mL) while being cooled in an ice bath. After 1 hour, the ice bath was removed and stirring was continued for an additional 12 hours, resulting in the formation of a green solution. The THF was then evaporated under reduced pressure, and the remaining residue was extracted with pentane (50 mL) and subsequently filtered. The pentane was evaporated under reduced pressure, leaving behind a green, oily solid that was further purified by sublimation at 70 °C under reduced pressure. This purification step yielded bright green crystals of the product, with a total weight of 3.0 g and a yield of 40%.

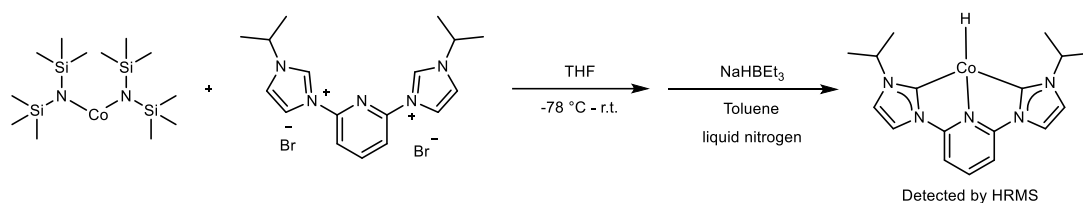

Co(HMDS)<sub>2</sub> (986 mg, 2.6 mmol) and CNC-<sup>i</sup>Pr (1.2 g, 2.26 mmol) were combined in a Schlenk tube. The tube was then placed in a -78°C environment, and precooled THF (100 mL) was slowly added via syringe. As the suspension gradually warmed up, it transitioned from red-orange to eventually forming a green solution at room temperature. The reaction mixture was stirred at room temperature for 8 hours, during which dark green precipitates began to form. After removing the volatile components under vacuum, a green residue remained and was washed with ether and subsequently dried under vacuum.

Next, a 20 mL Schlenk tube was filled with a solution of 0.154 g of the green residue in approximately 3 mL of toluene. The mixture was cooled in a liquid nitrogen-cooled cold well for approximately 5 minutes, and with vigorous stirring, 315 μL (0.315 mmol) of a 1 M solution of NaHBET<sub>3</sub> in THF were added dropwise. The mixture was then stirred at room temperature for 12 hours before being filtered. The residue was washed twice with toluene and three times with pentane (in 5 mL portions each time), resulting in the acquisition of 58 mg of a dark green powder. This powder was then subjected to HRMS testing, leading to the detection of (CNC-<sup>i</sup>Pr)Co(I)H (as shown in Figure S17).

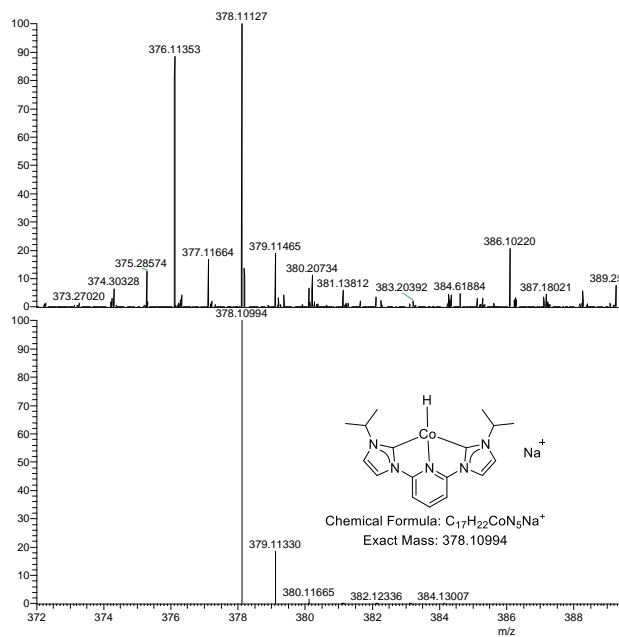

Supplementary Figure 17 HRMS of (CNC-<sup>i</sup>Pr)<sub>2</sub>Co(I)H

## 6.10 Detection of H<sub>2</sub> by gas chromatography

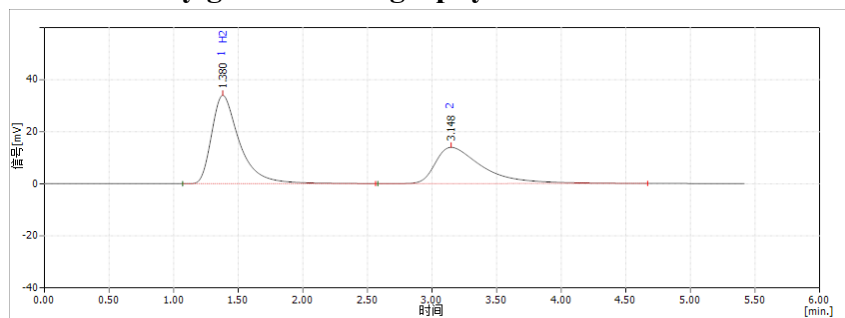

Supplementary Figure 18 GC of the gas from the headspace of the model reaction

## 7. NMR spectra

$^1\text{H}$  NMR (600 MHz, DMSO-*d*<sub>6</sub>) of CNC-*i*Pr (*See procedure*)

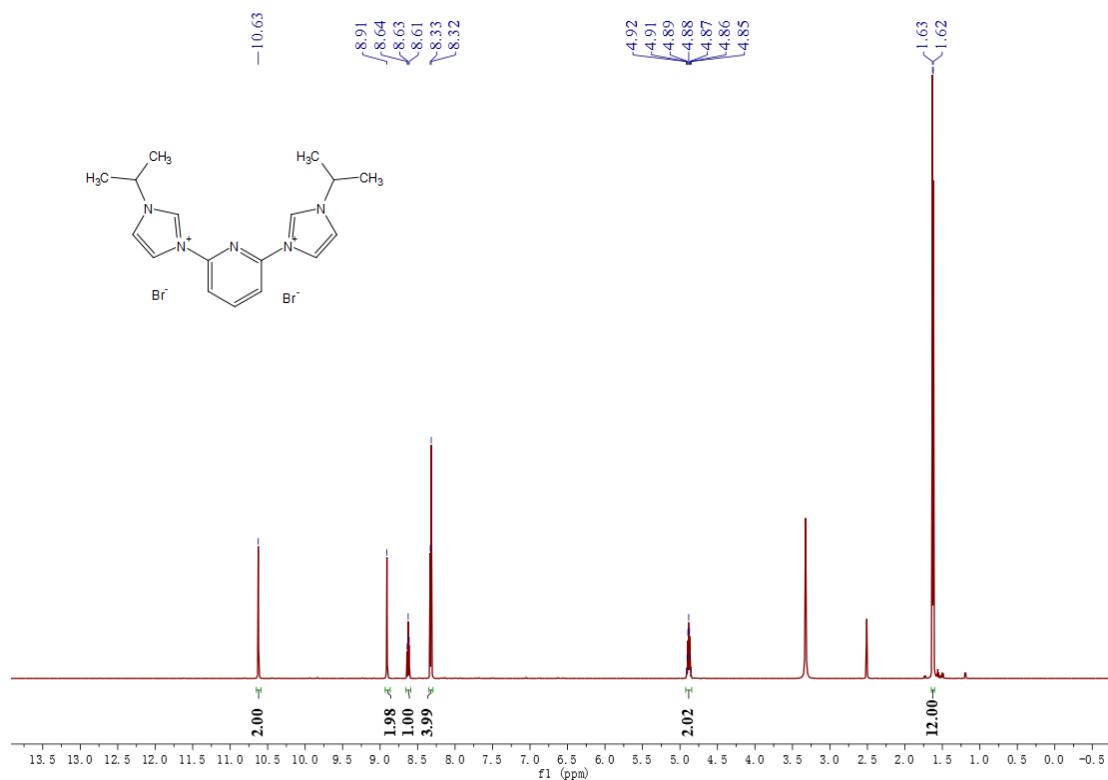

$^1\text{H}$  NMR (400 MHz, Chloroform-*d*) of CNC-H (*See procedure*)

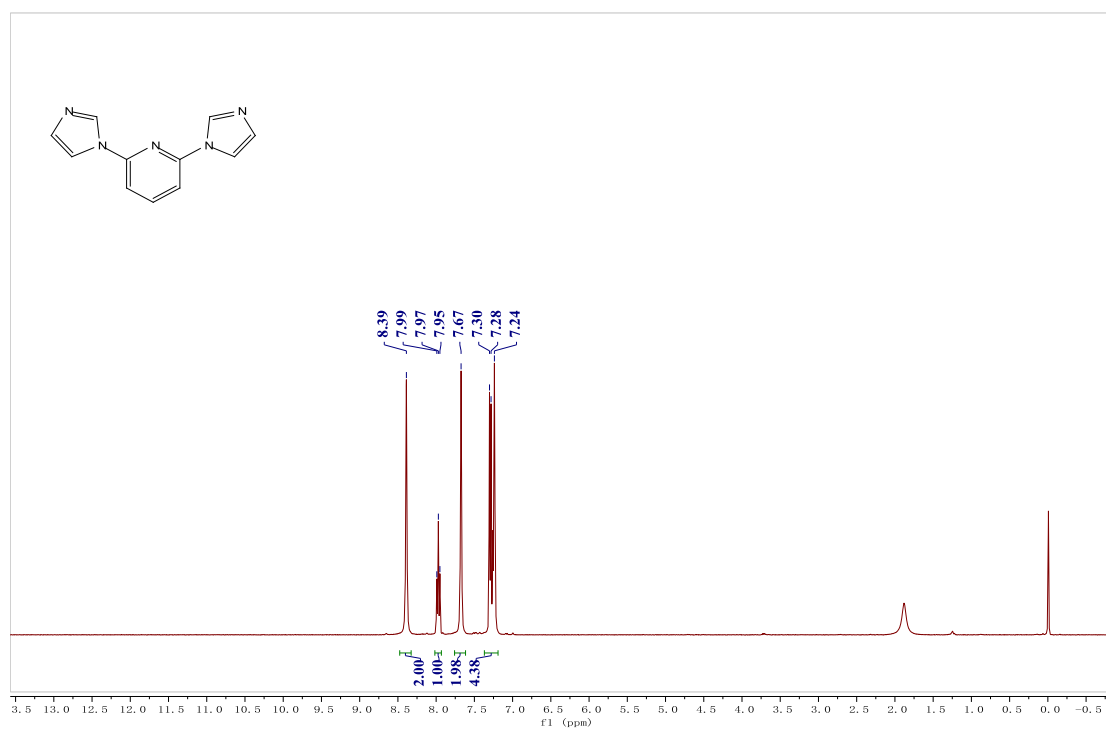

$^1\text{H}$  NMR (400 MHz, DMSO-*d*<sub>6</sub>) of CNC-Me (*See procedure*)



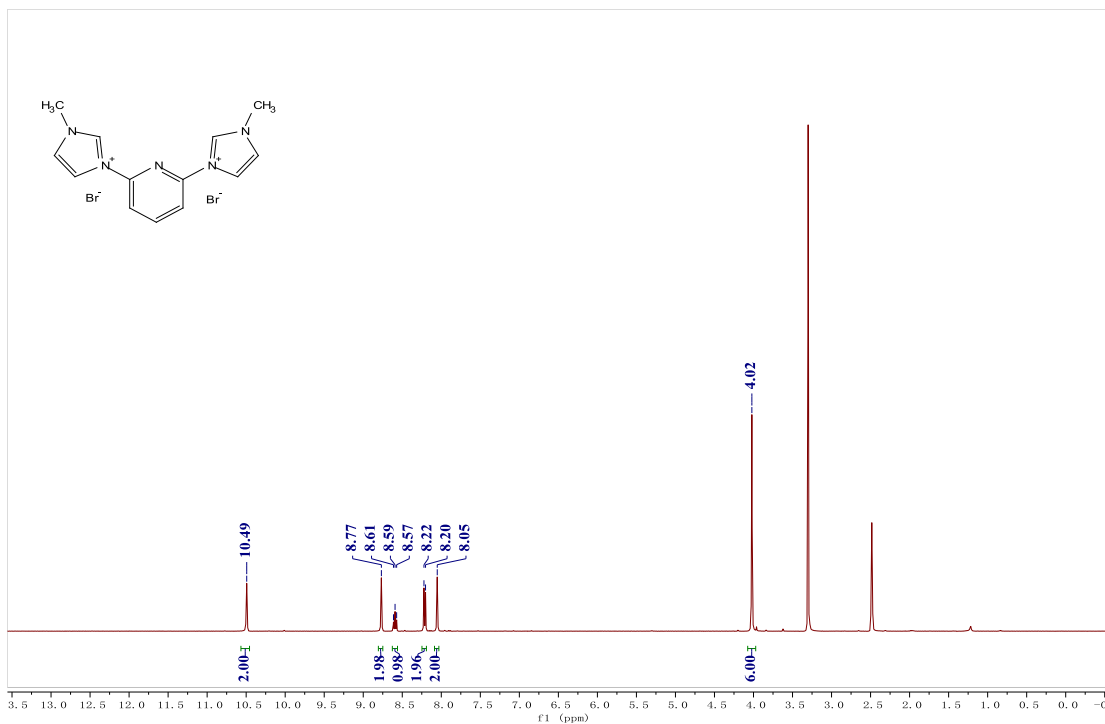

$^1\text{H}$  NMR (400 MHz, DMSO- $d_6$ ) of CNC-Et ([See procedure](#))

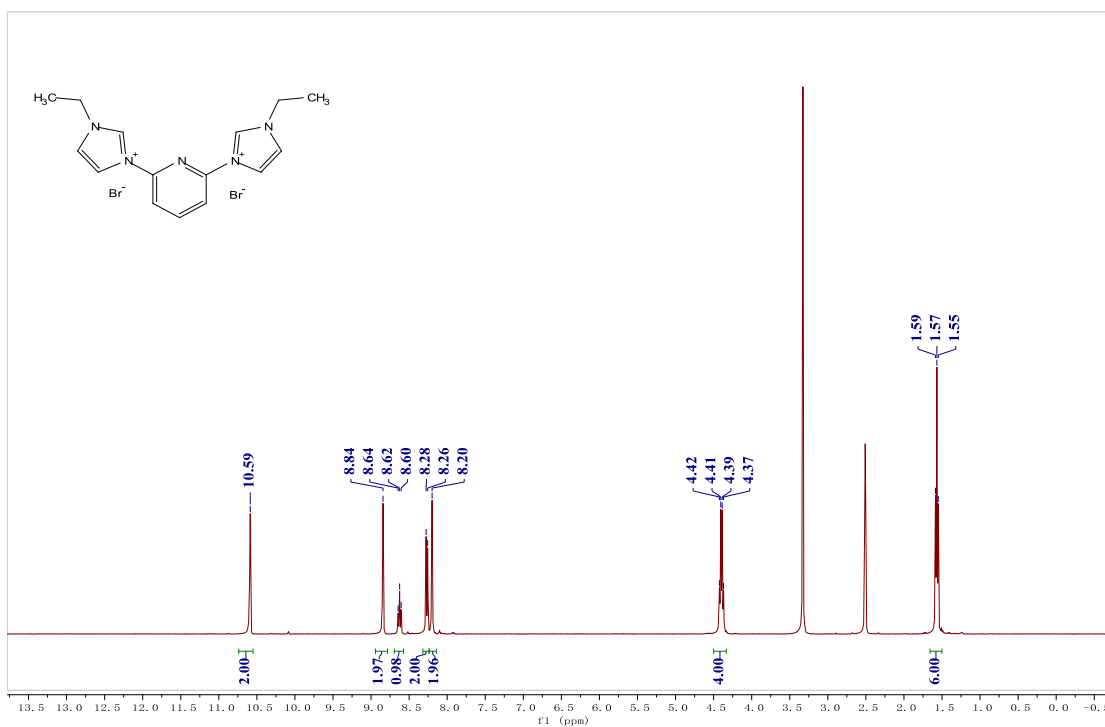

$^1\text{H}$  NMR (400 MHz, DMSO- $d_6$ ) of CNC- $t$ Bu ([See procedure](#))

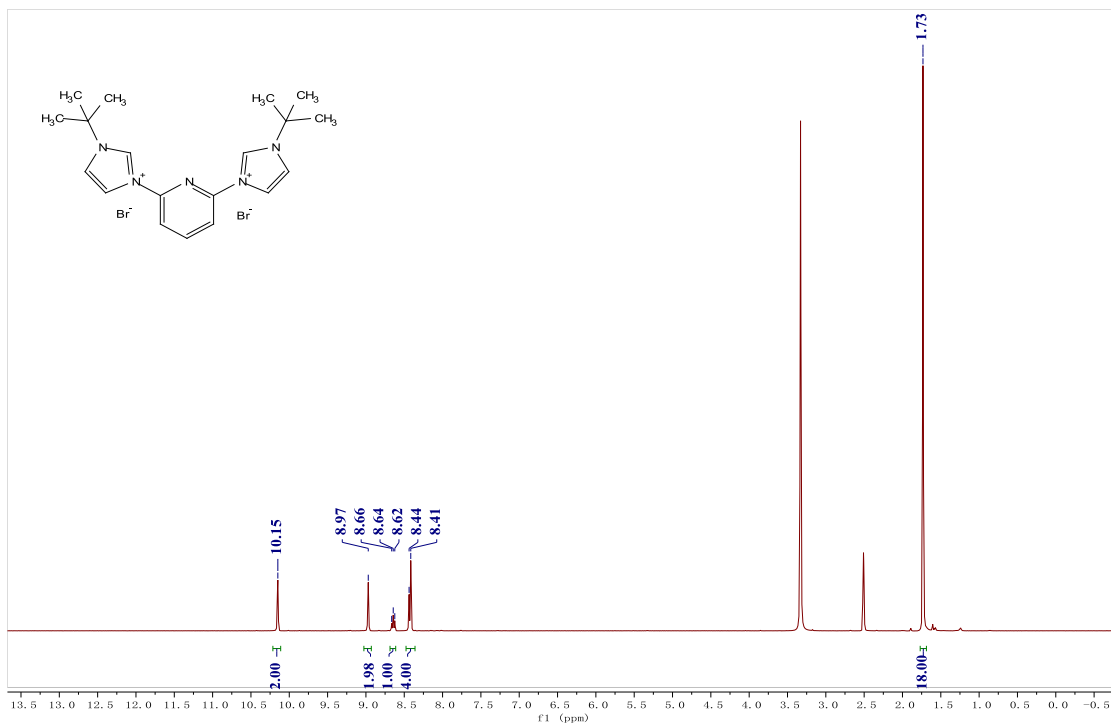

<sup>1</sup>H NMR (400 MHz, Chloroform-*d*) of CNC-Mes ([See procedure](#))

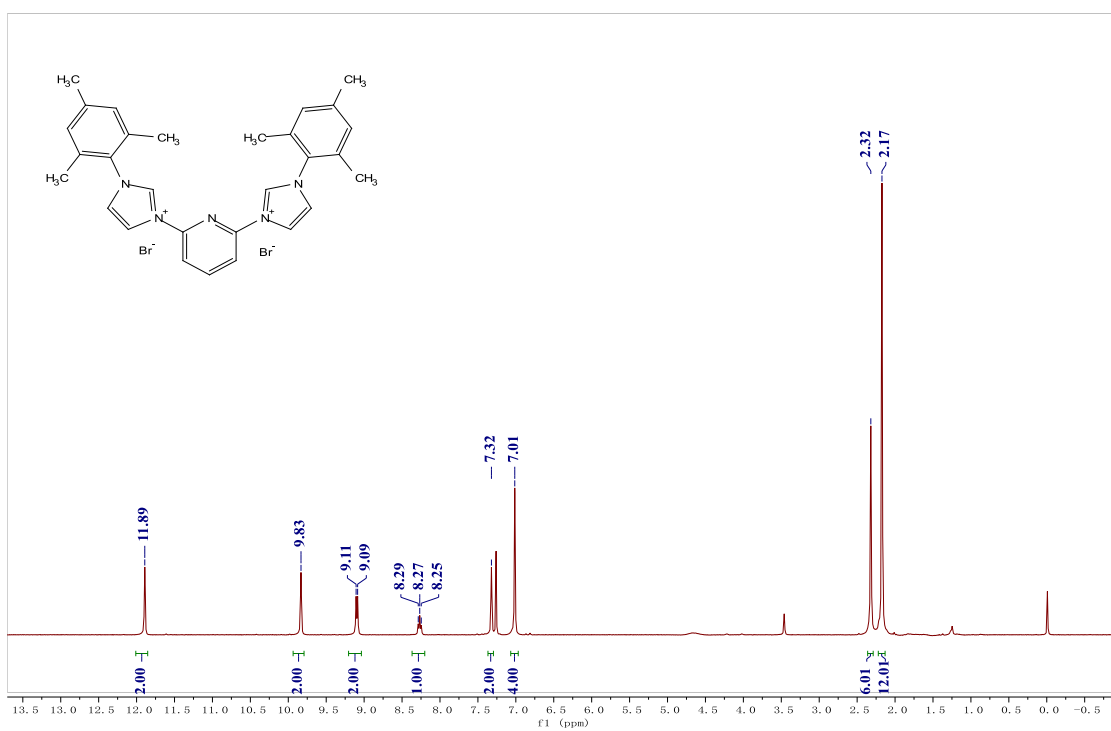

<sup>1</sup>H NMR (400 MHz, Chloroform-*d*) of 5a ([See procedure](#))

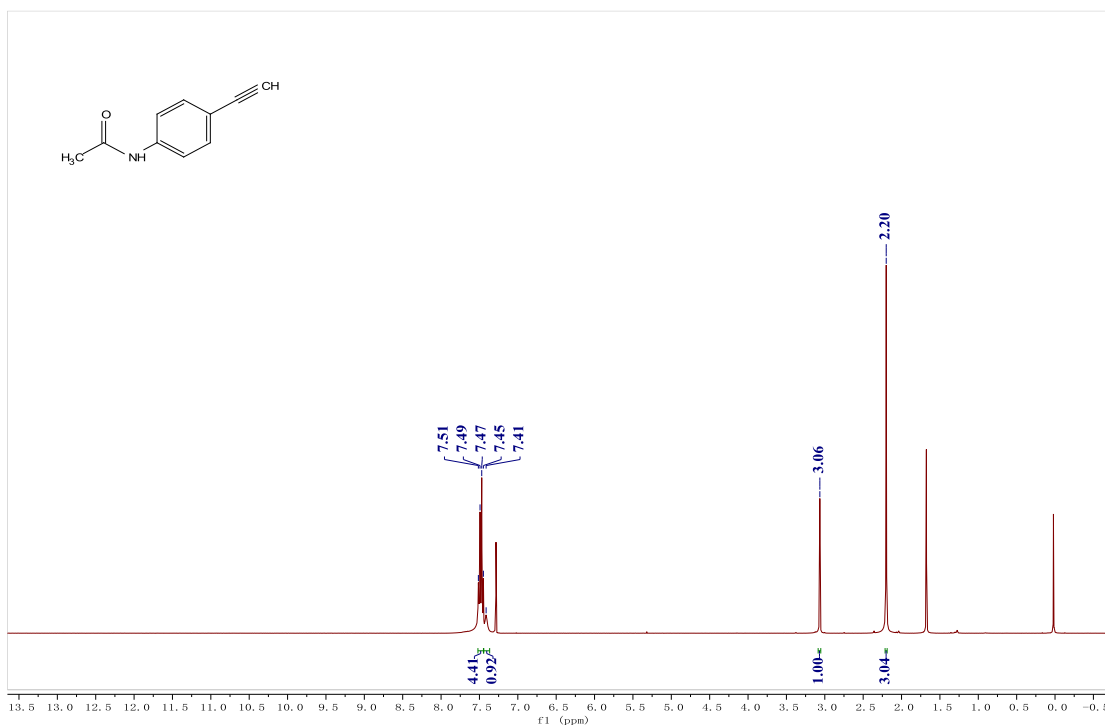

$^1\text{H}$  NMR (600 MHz, Chloroform-*d*) of **6a** ([See procedure](#))

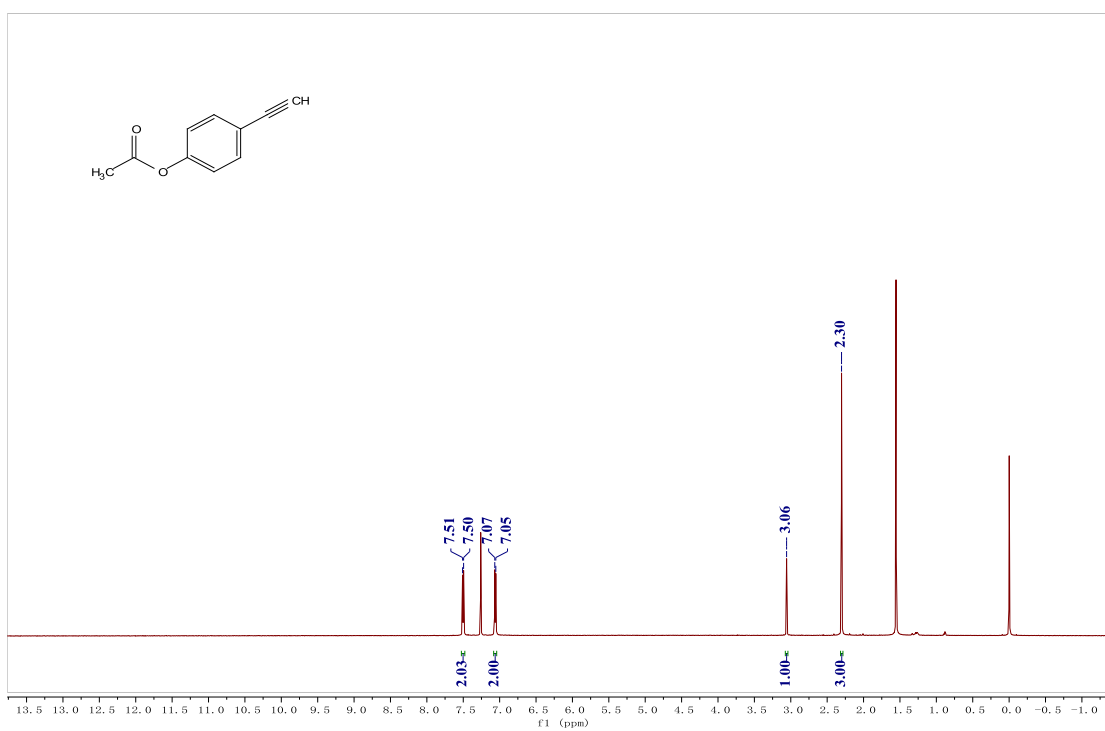

$^1\text{H}$  NMR (400 MHz, Chloroform-*d*) of **16a** ([See procedure](#))

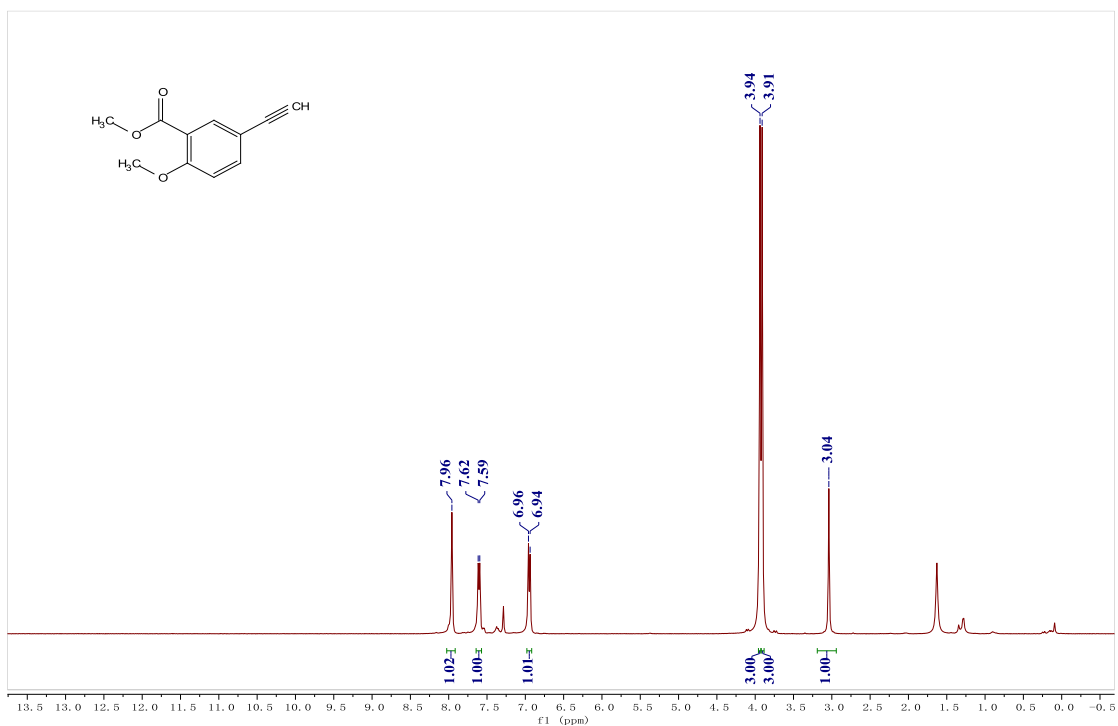

$^1\text{H}$  NMR (400 MHz, Chloroform-*d*) of **22a** ([See procedure](#))

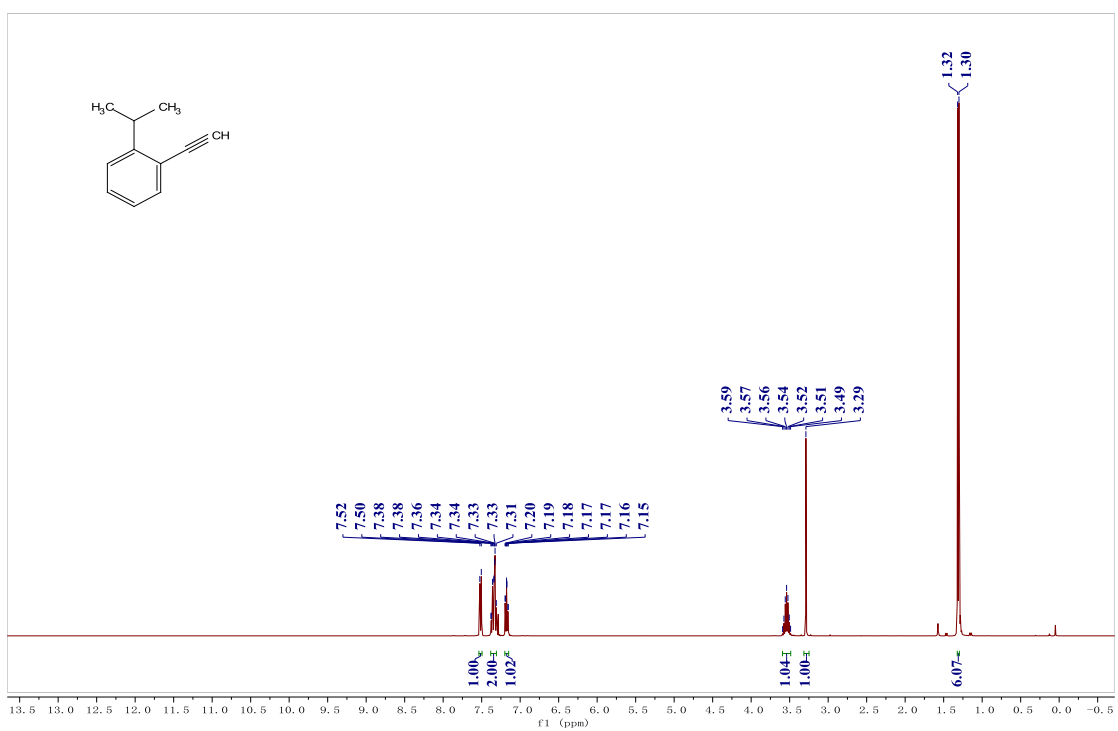

$^1\text{H}$  NMR (600 MHz, Chloroform-*d*) of **23a** ([See procedure](#))

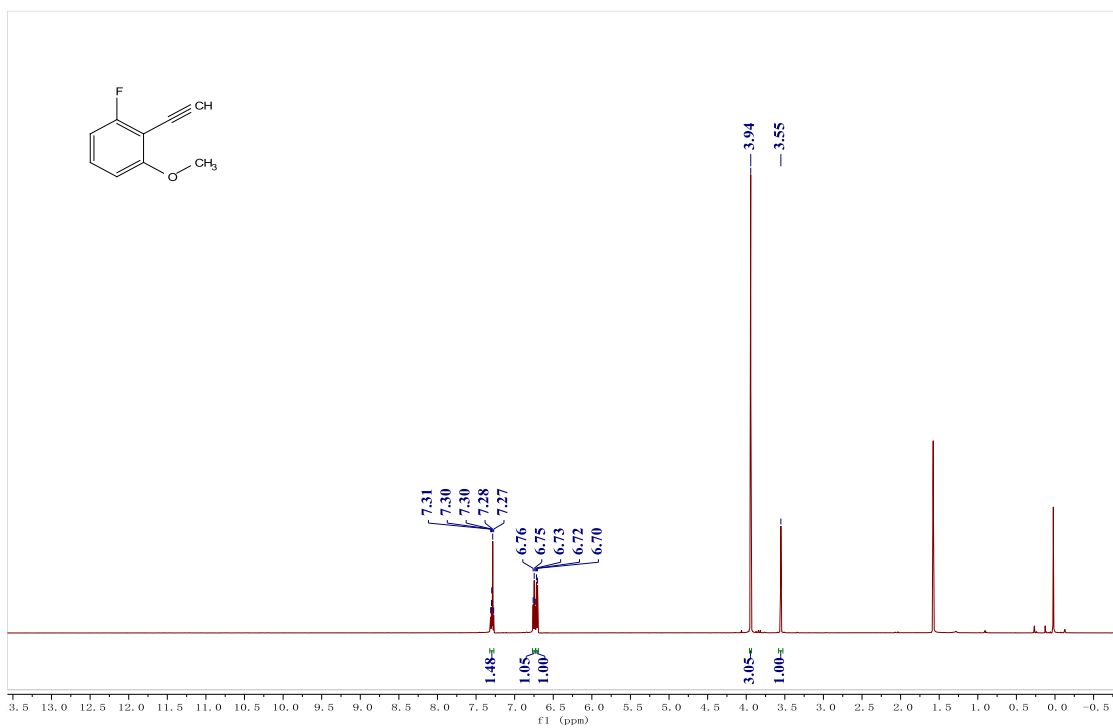

<sup>1</sup>H NMR (400 MHz, Chloroform-*d*) of 24a (See procedure)

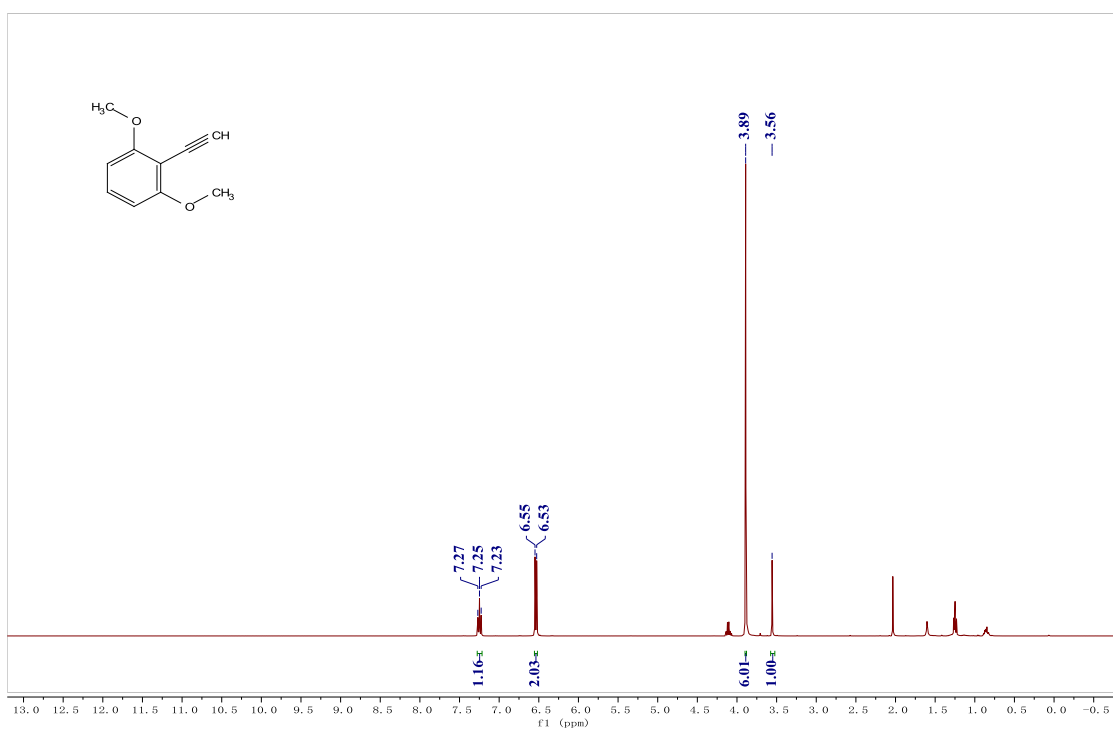

<sup>1</sup>H NMR (400 MHz, Chloroform-*d*) of 26a (See procedure)

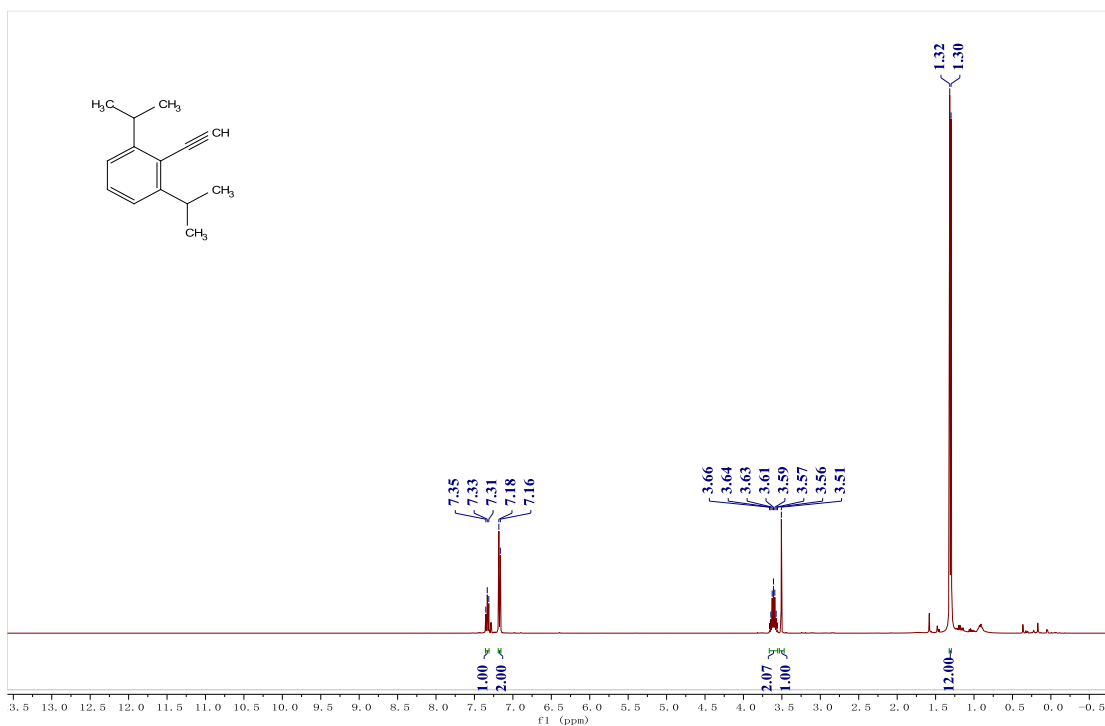

<sup>1</sup>H NMR (400 MHz, Chloroform-*d*) of **41a** (See procedure)

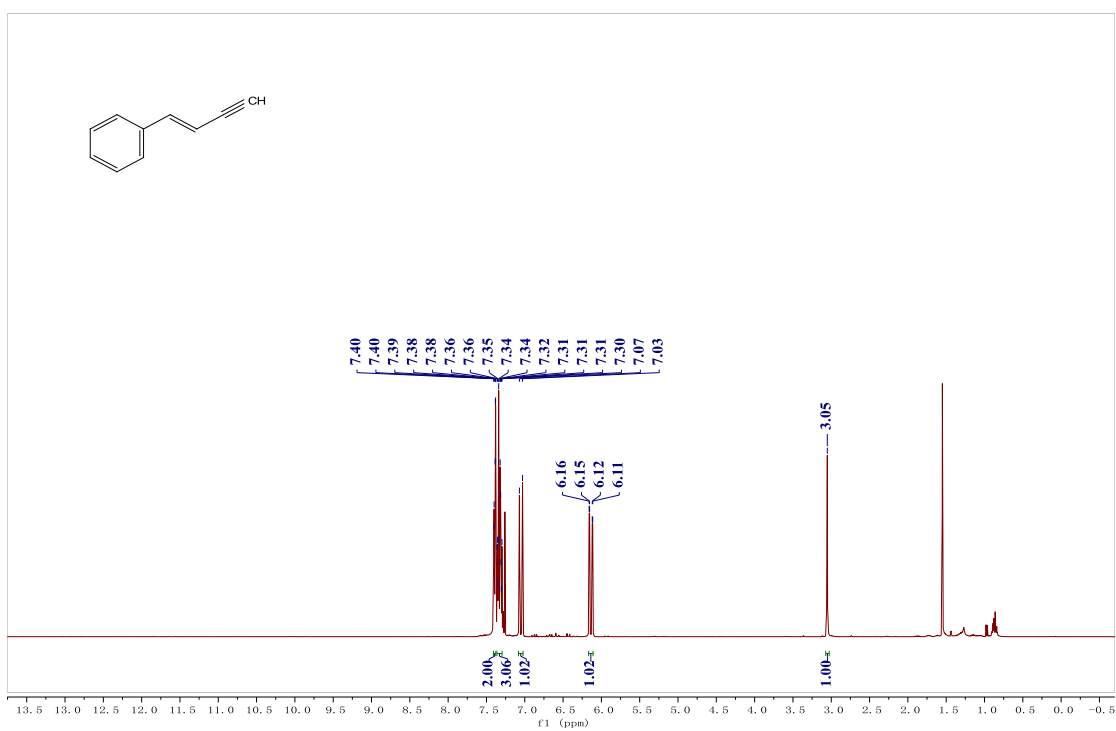

<sup>1</sup>H NMR (400 MHz, Chloroform-*d*) of **1b** (See procedure)

苯乙炔-Z, 10. f1d

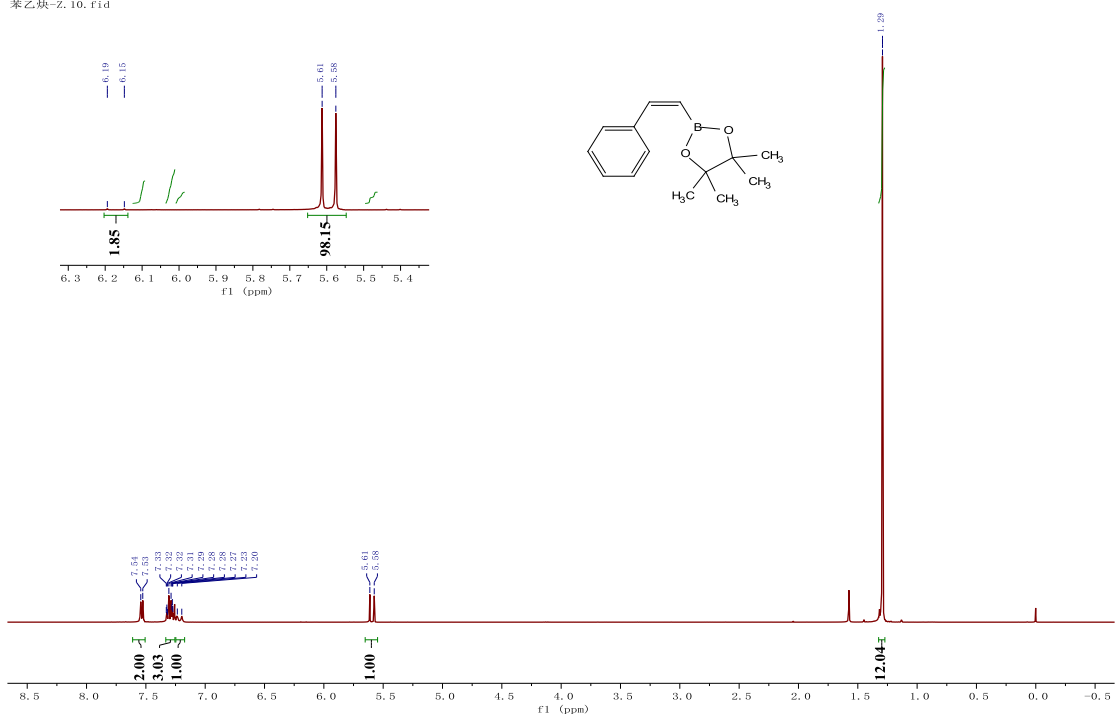

<sup>11</sup>B NMR (128 MHz, Chloroform-*d*) of **1b** ([See procedure](#))

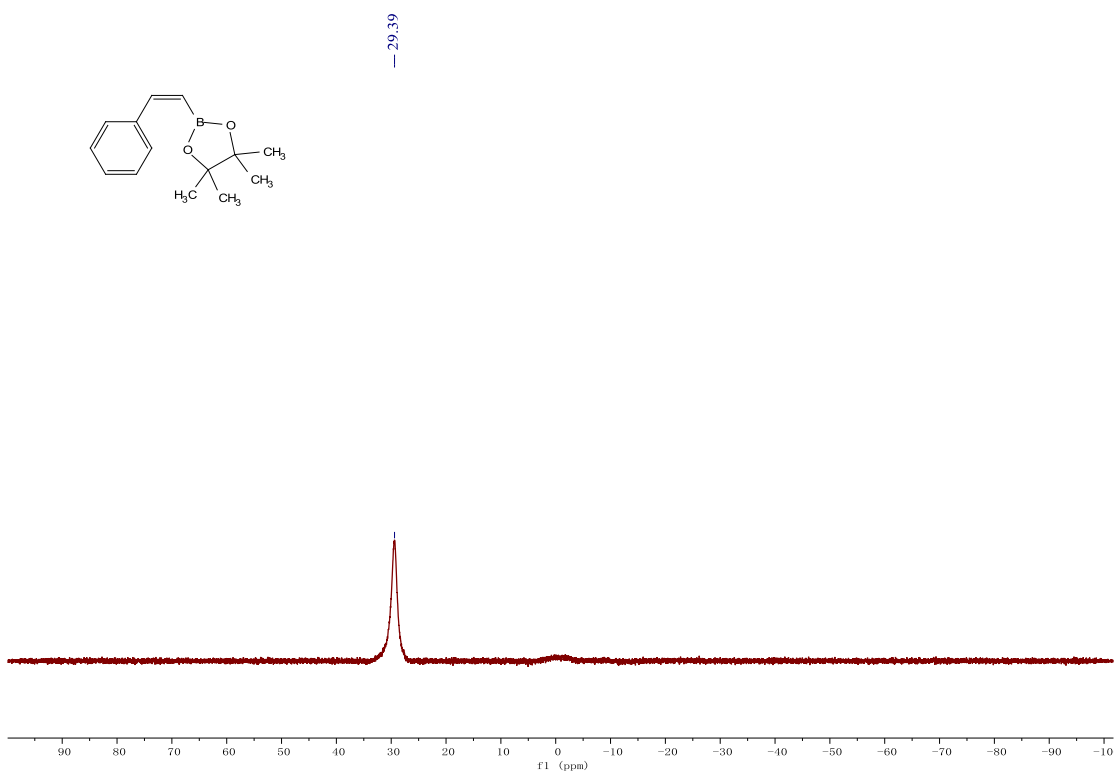

<sup>1</sup>H NMR (400 MHz, Chloroform-*d*) of **2b** ([See procedure](#))

hp-wj1-518-1-3-chr.10.fid

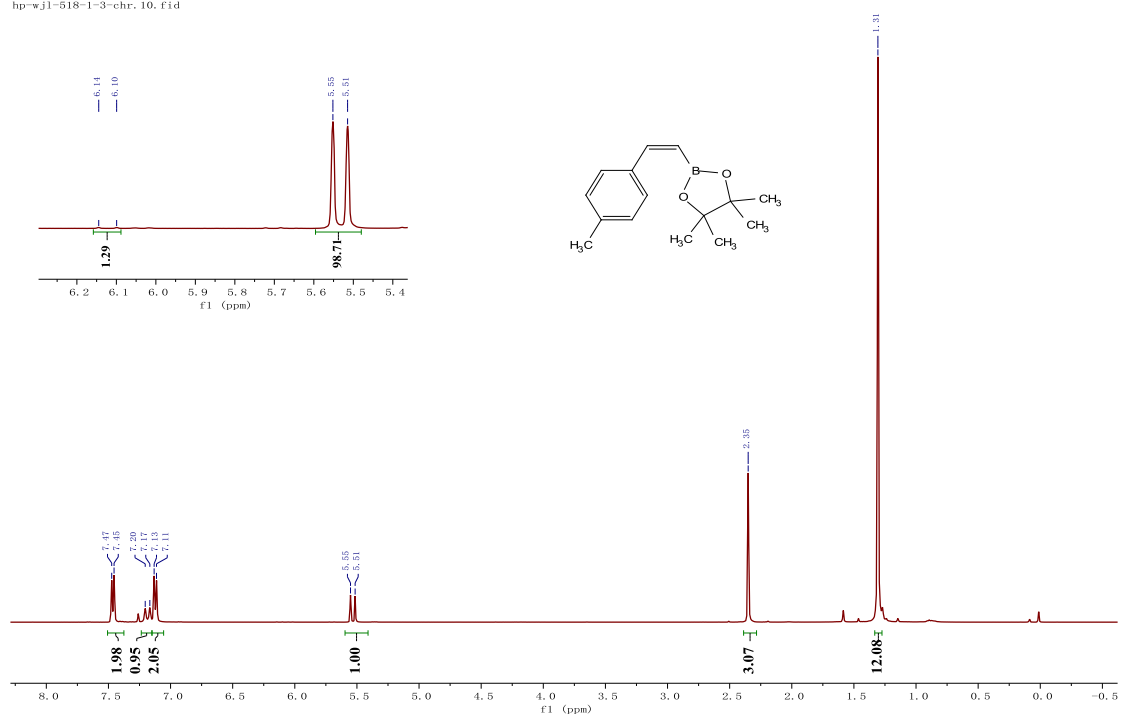

<sup>1</sup>H NMR (400 MHz, Chloroform-*d*) of **3b** ([See procedure](#))

hp-wj1-554-1-1-chr.10.fid

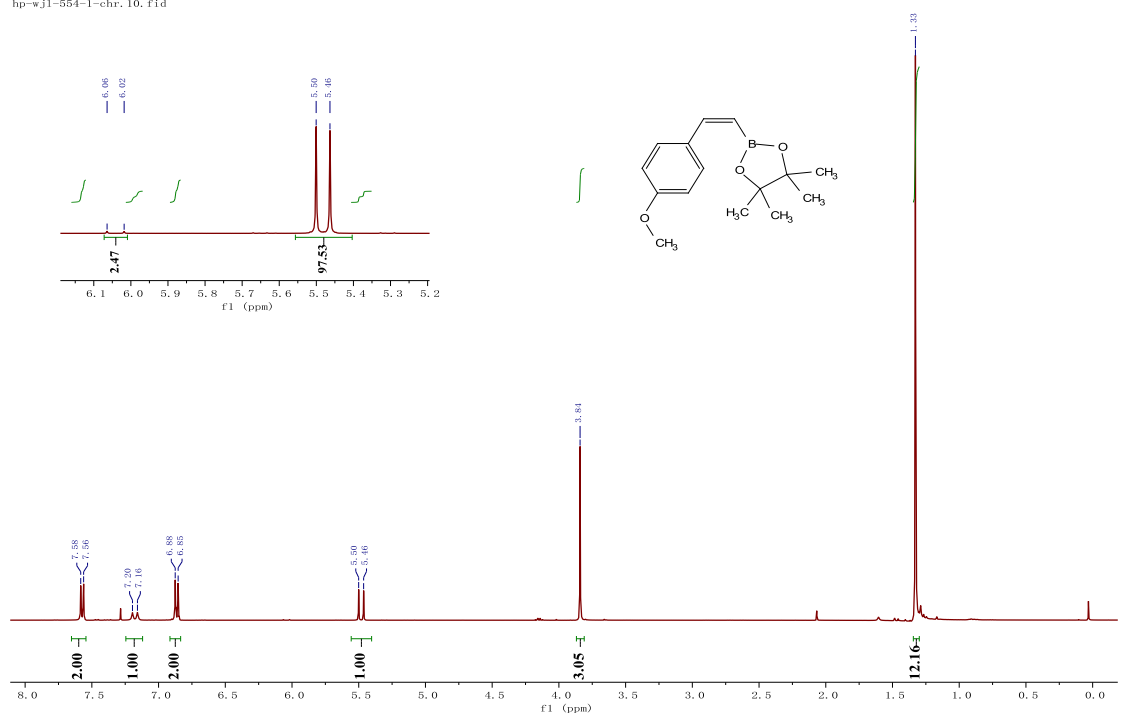



$^{11}\text{B}$  NMR (193 MHz, Chloroform-*d*) of **3b** ([See procedure](#))

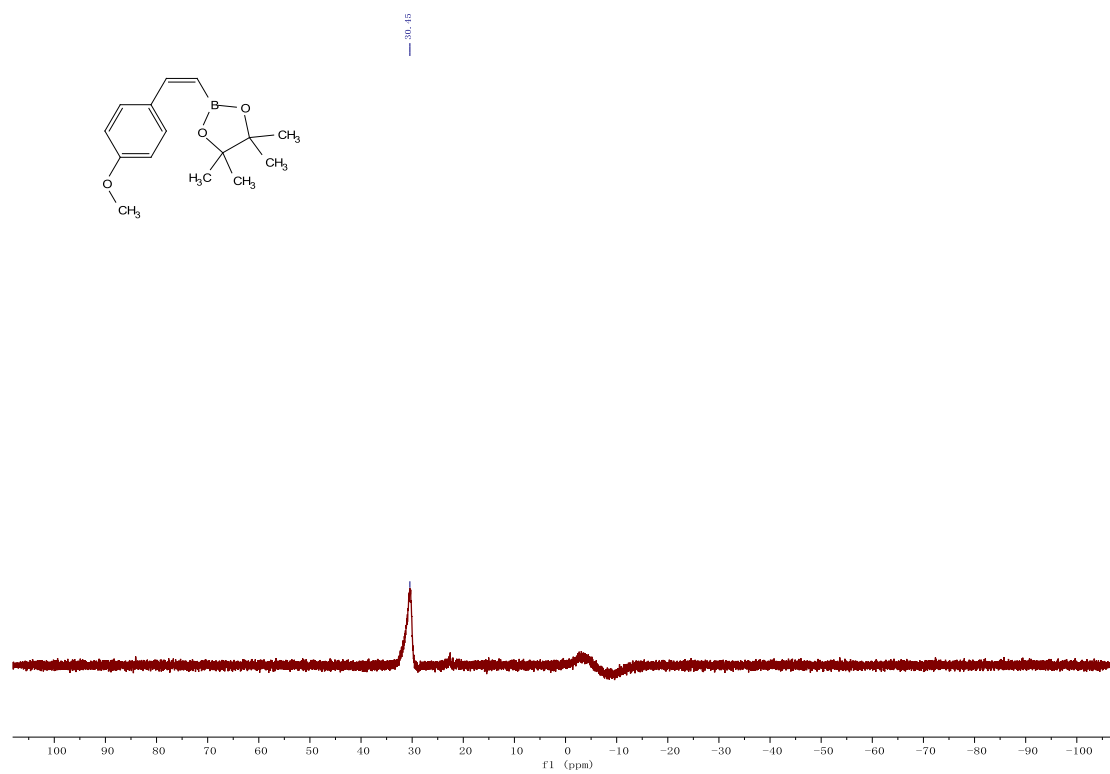

# <sup>1</sup>H NMR (400 MHz, Chloroform-*d*) of **4b** (*See procedure*)

hp-wj1-638-3-CHR.10.f1d

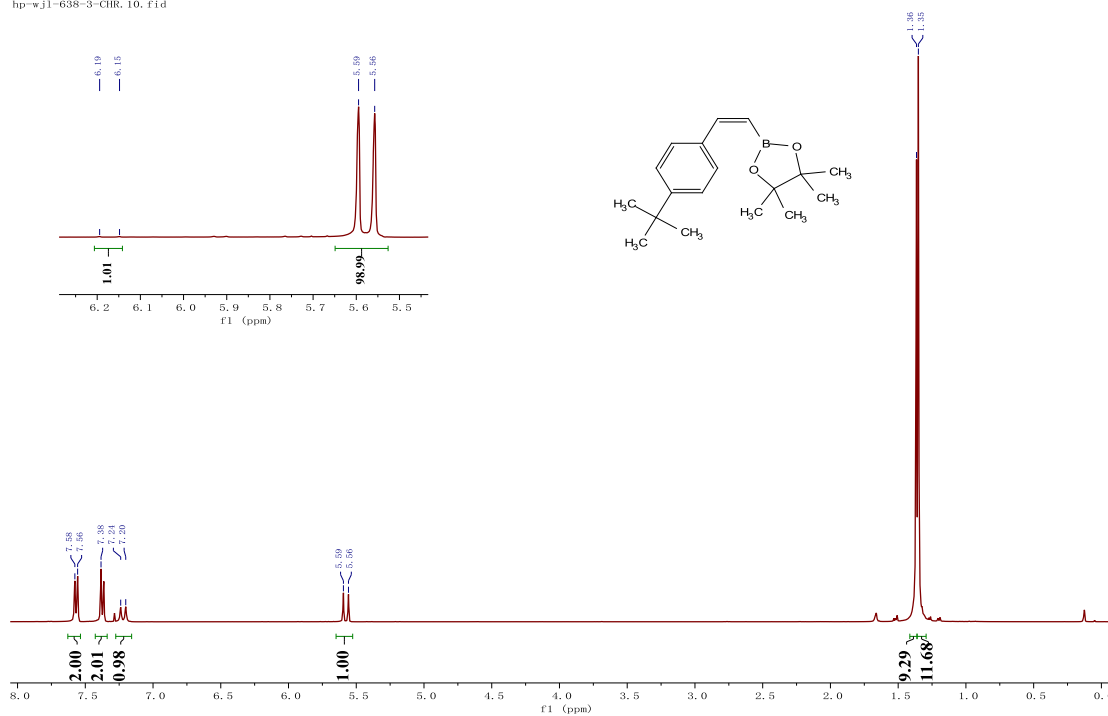

# <sup>1</sup>H NMR (400 MHz, Chloroform-*d*) of **5b** (*See procedure*)

hp-wj1-684-2-CHR.H.12.f1d

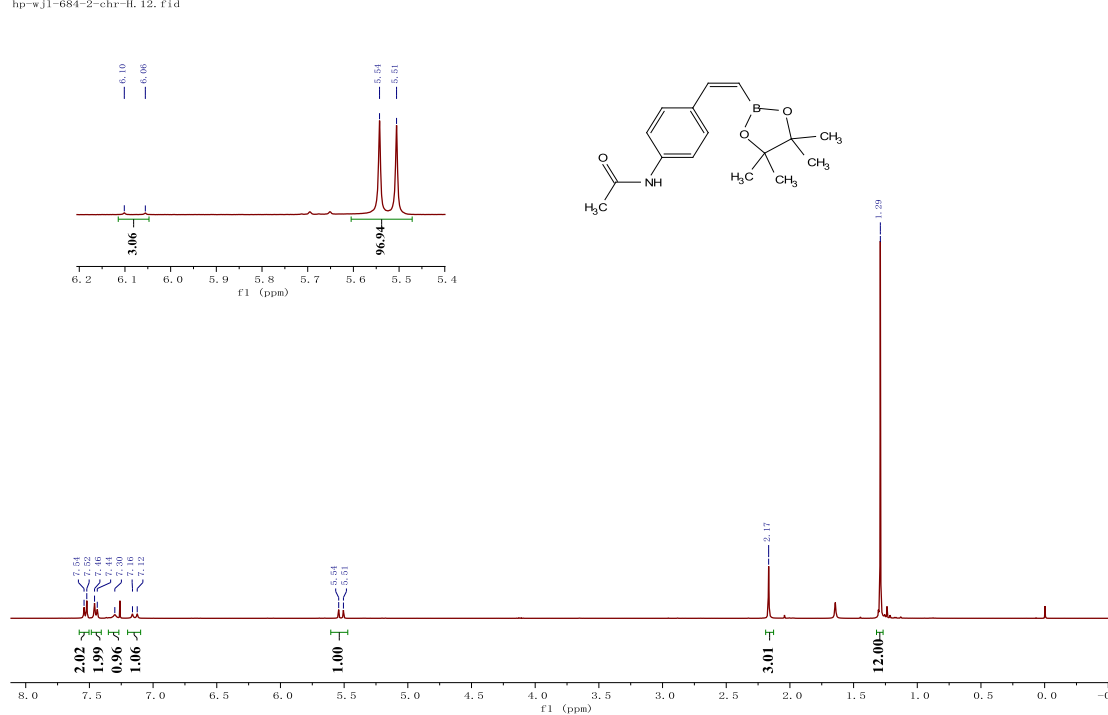

$^{13}\text{C}$  NMR (101 MHz, Chloroform-*d*) of **5b** ([See procedure](#))

hp-wj1-684-2-chr-C, 13, f1.d

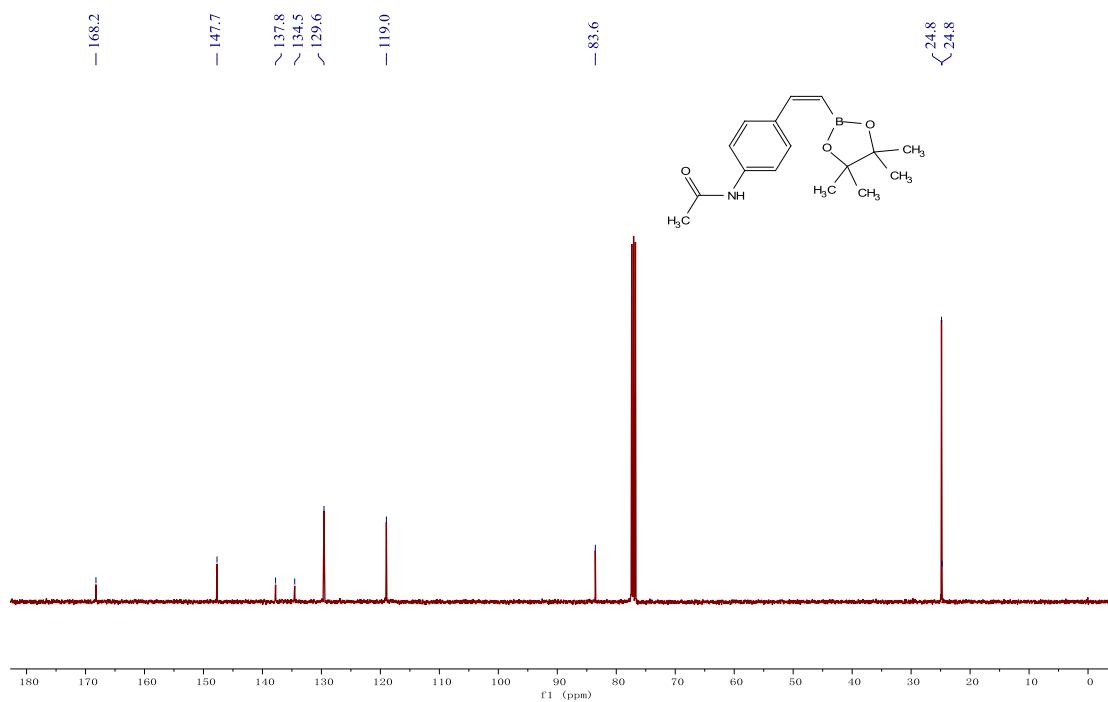

$^{11}\text{B}$  NMR (193 MHz, Chloroform-*d*) of **5b** ([See procedure](#))

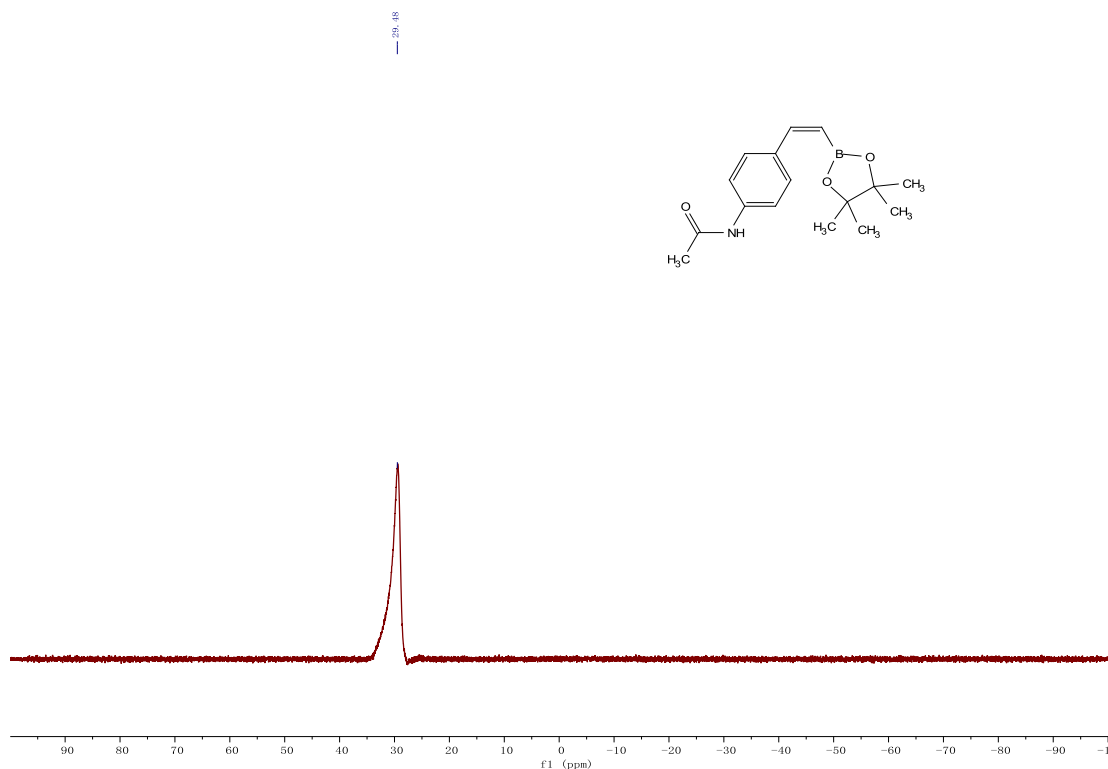

<sup>1</sup>H NMR (400 MHz, Chloroform-*d*) of **6b** ([See procedure](#))

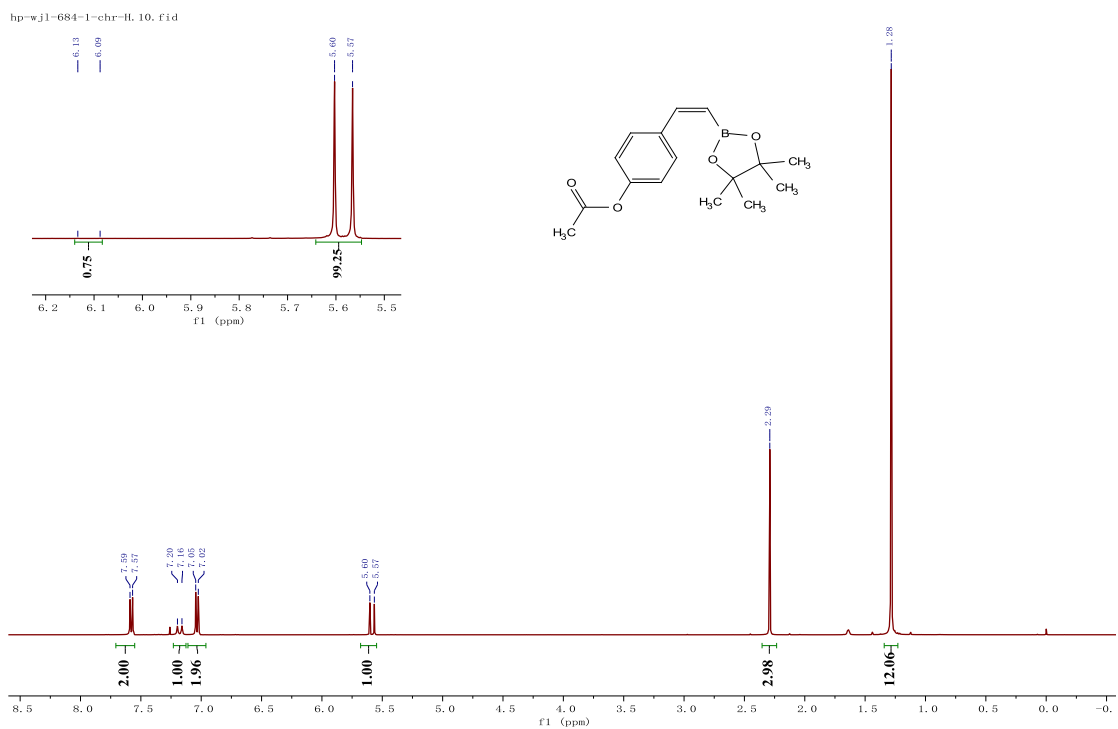

<sup>13</sup>C NMR (101 MHz, Chloroform-*d*) of **6b** ([See procedure](#))

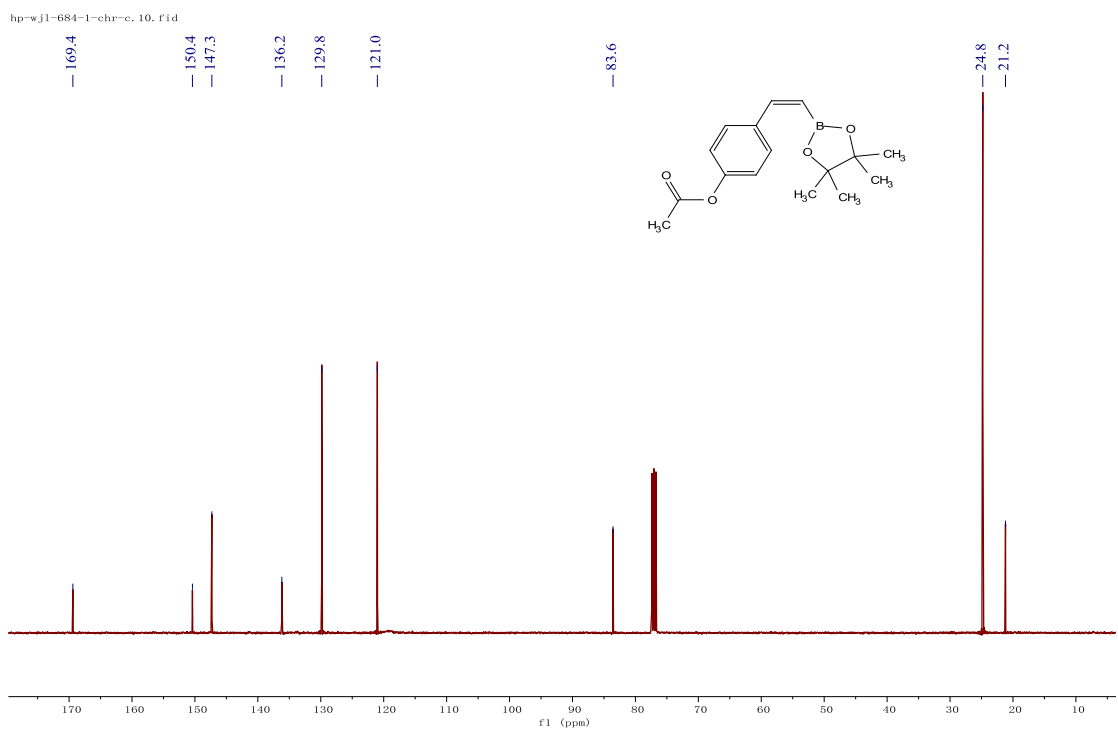

$^{11}\text{B}$  NMR (193 MHz, Chloroform-*d*) of **6b** ([See procedure](#))

-30.2

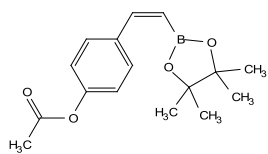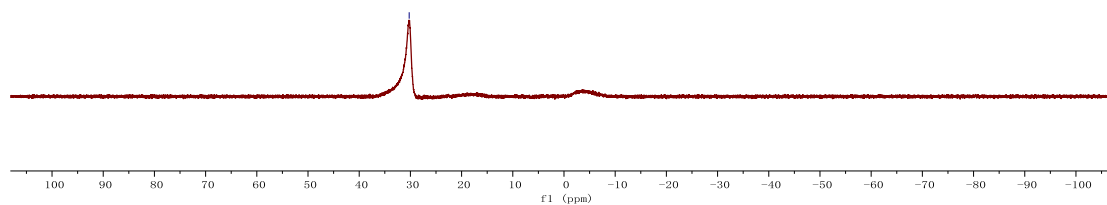

$^1\text{H}$  NMR (600 MHz, Chloroform-*d*) of **7b** ([See procedure](#))

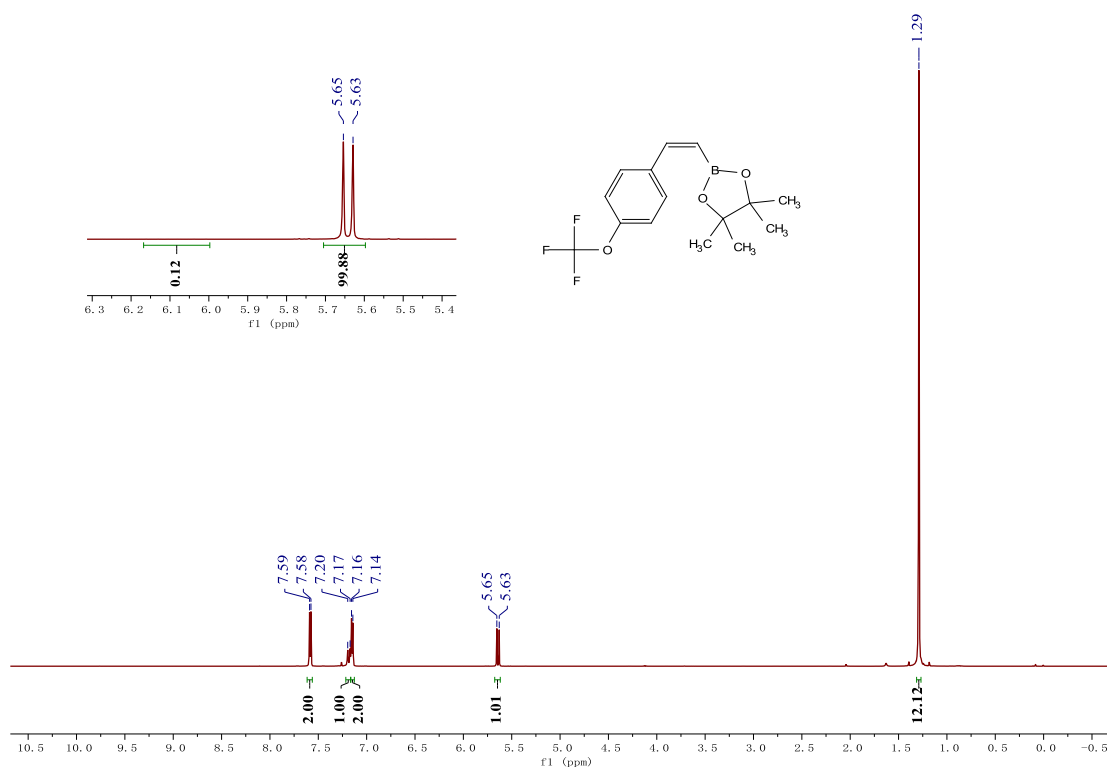

<sup>19</sup>F NMR (565 MHz, Chloroform-*d*) of **7b** ([See procedure](#))

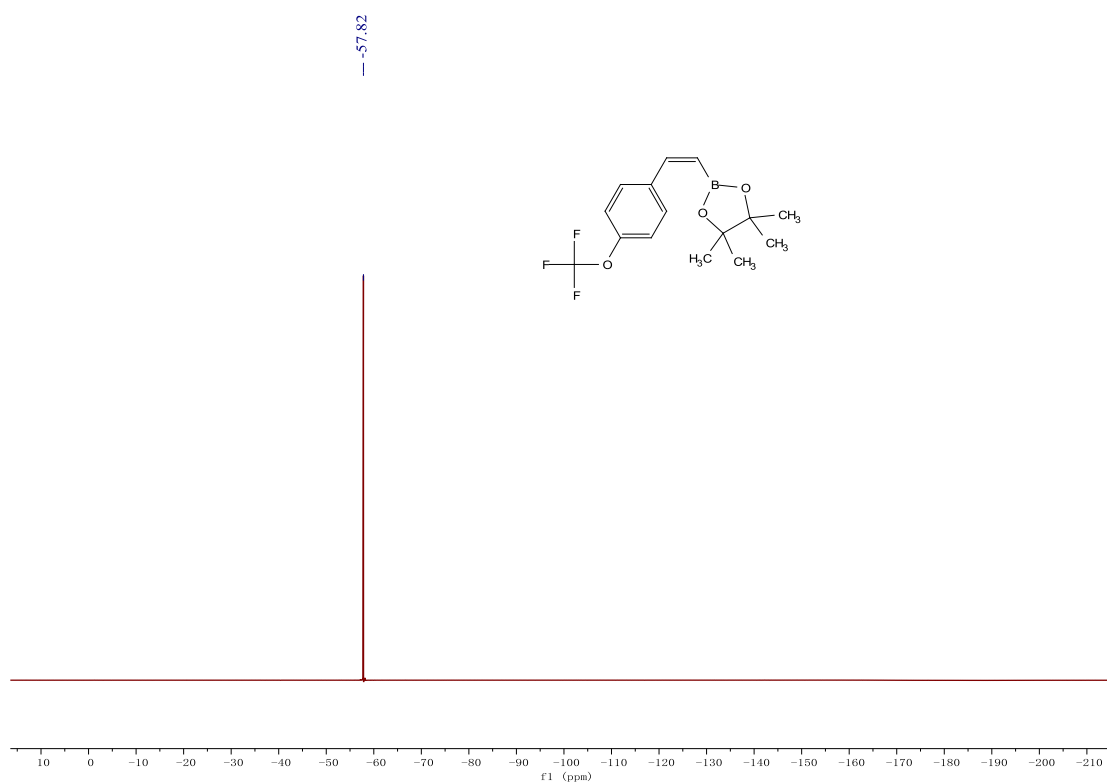

<sup>12</sup>C NMR (151 MHz, Chloroform-*d*) of **7b** ([See procedure](#))

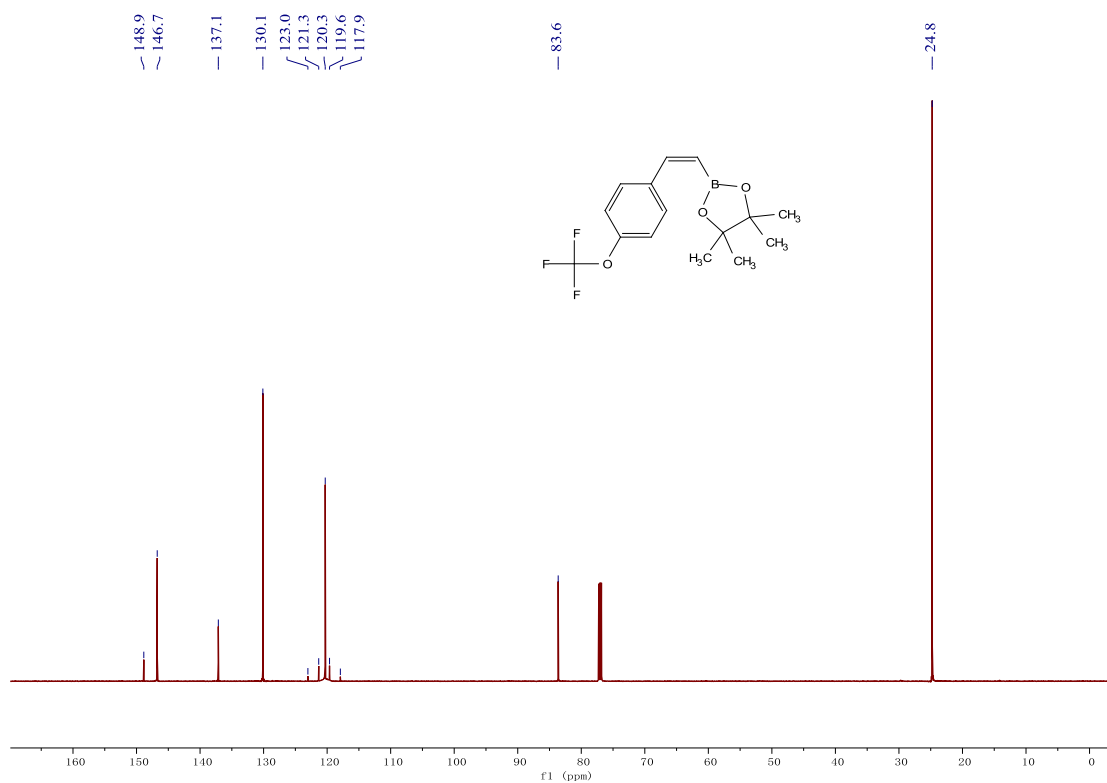

$^{11}\text{B}$  NMR (193 MHz, Chloroform-*d*) of **7b** ([See procedure](#))

-30.11

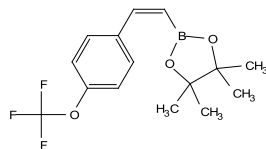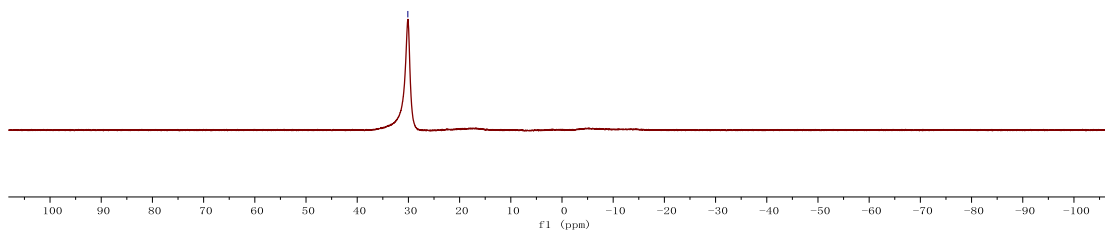

$^1\text{H}$  NMR (400 MHz, Chloroform-*d*) of **8b** ([See procedure](#))

hp-wj1-733-2-H-chr. 10. f1d

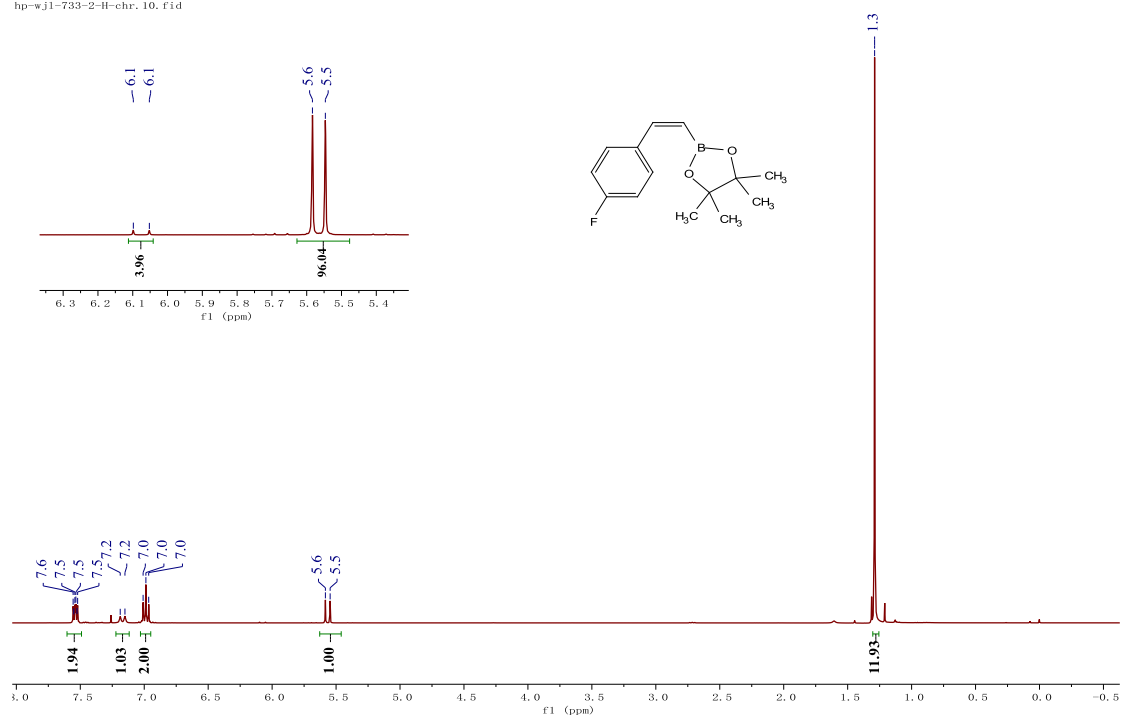

$^{13}\text{C}$  NMR (101 MHz, Chloroform-*d*) of **8b** ([See procedure](#))

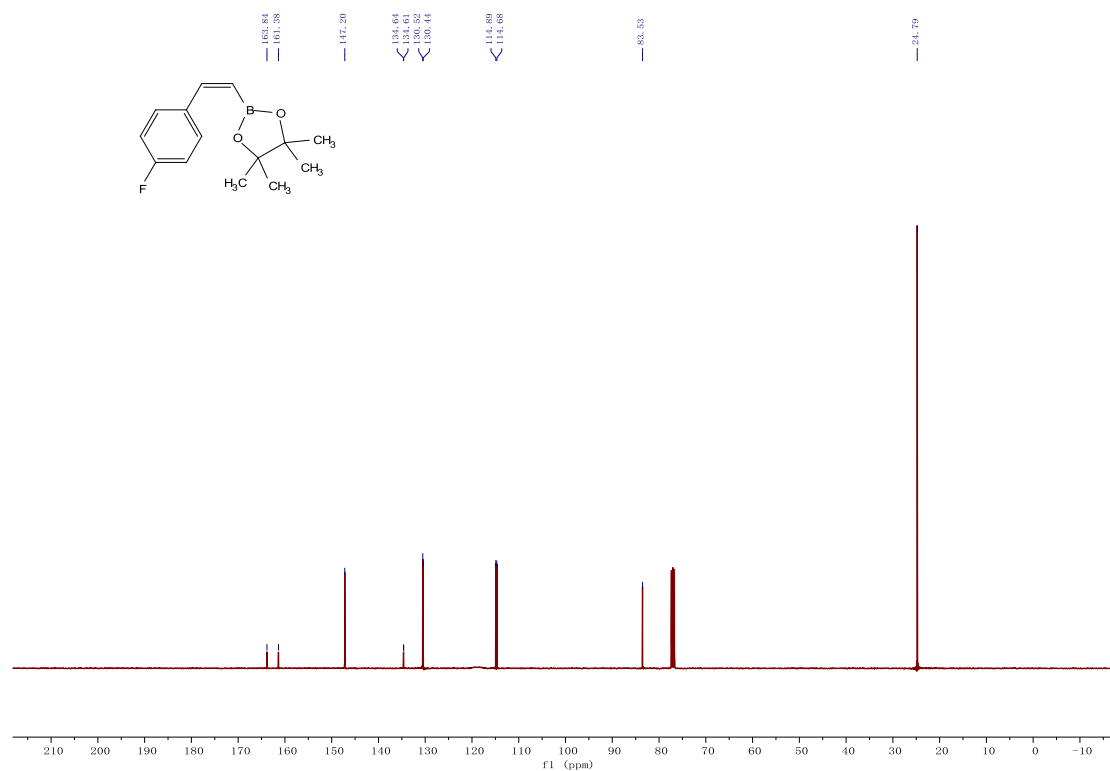

$^{11}\text{B}$  NMR (128 MHz, Chloroform-*d*) of **8b** ([See procedure](#))

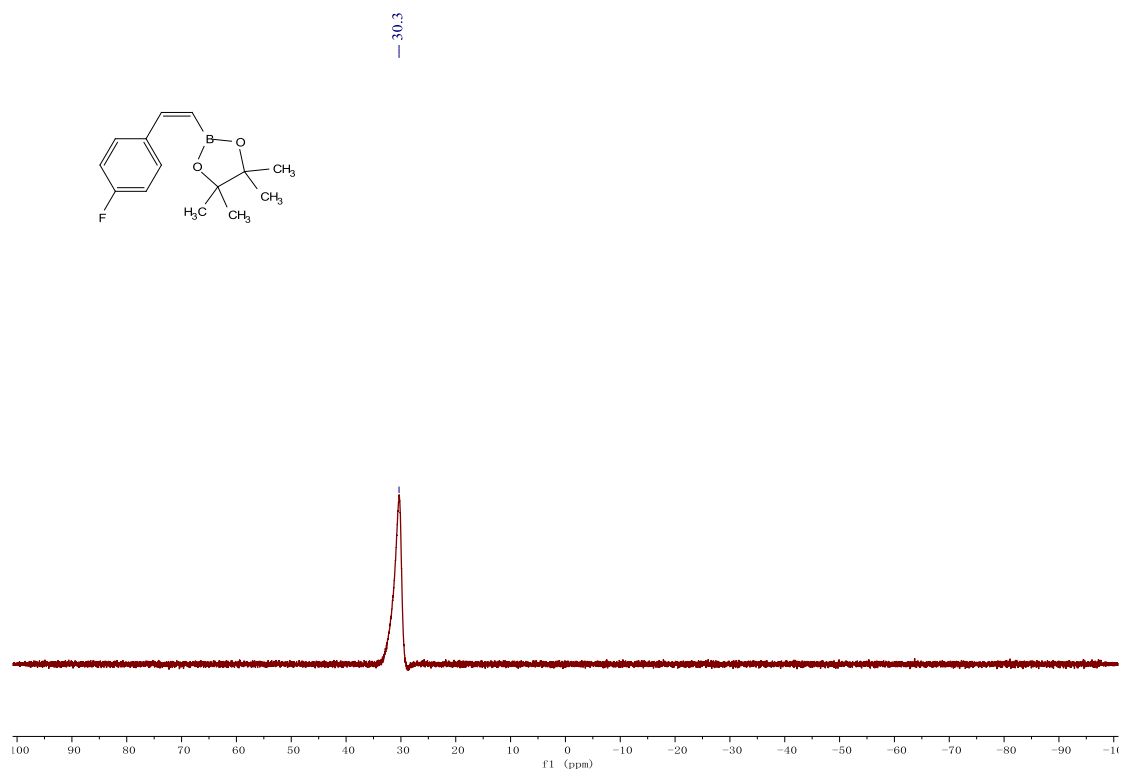



$^{19}\text{F}$  NMR (377 MHz, Chloroform-*d*) of **8b** ([See procedure](#))

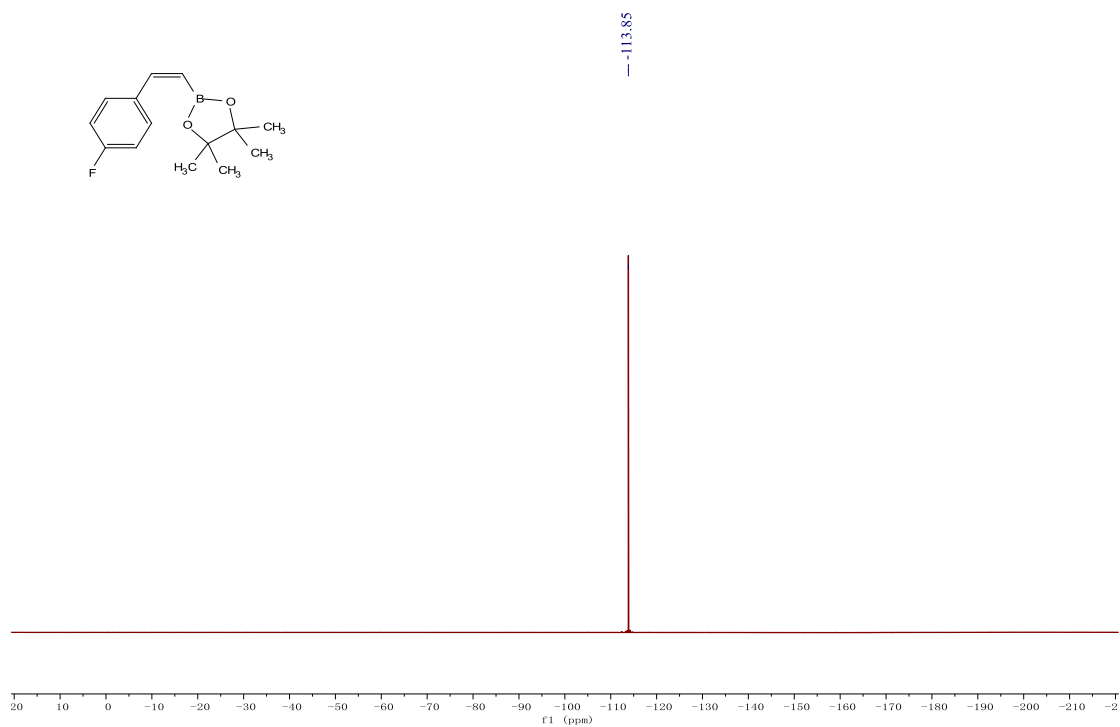

$^1\text{H}$  NMR (400 MHz, Chloroform-*d*) of **9b** ([See procedure](#))

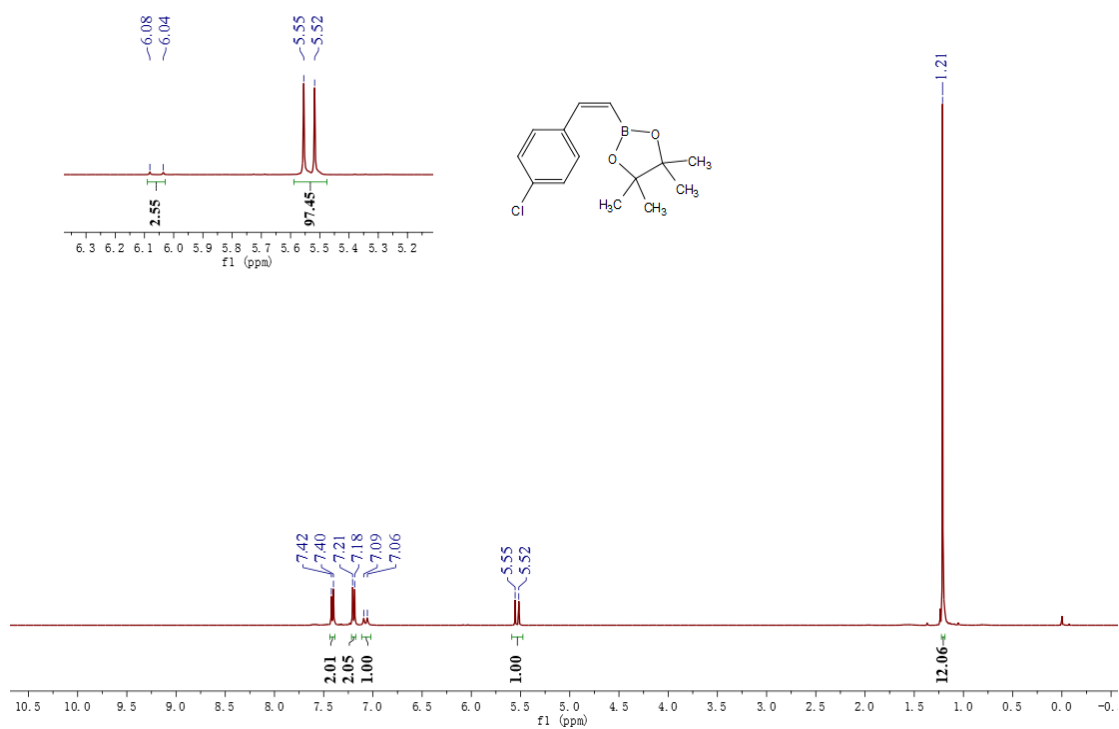

$^1\text{H}$  NMR (400 MHz, Chloroform-*d*) of 10b ([See procedure](#))

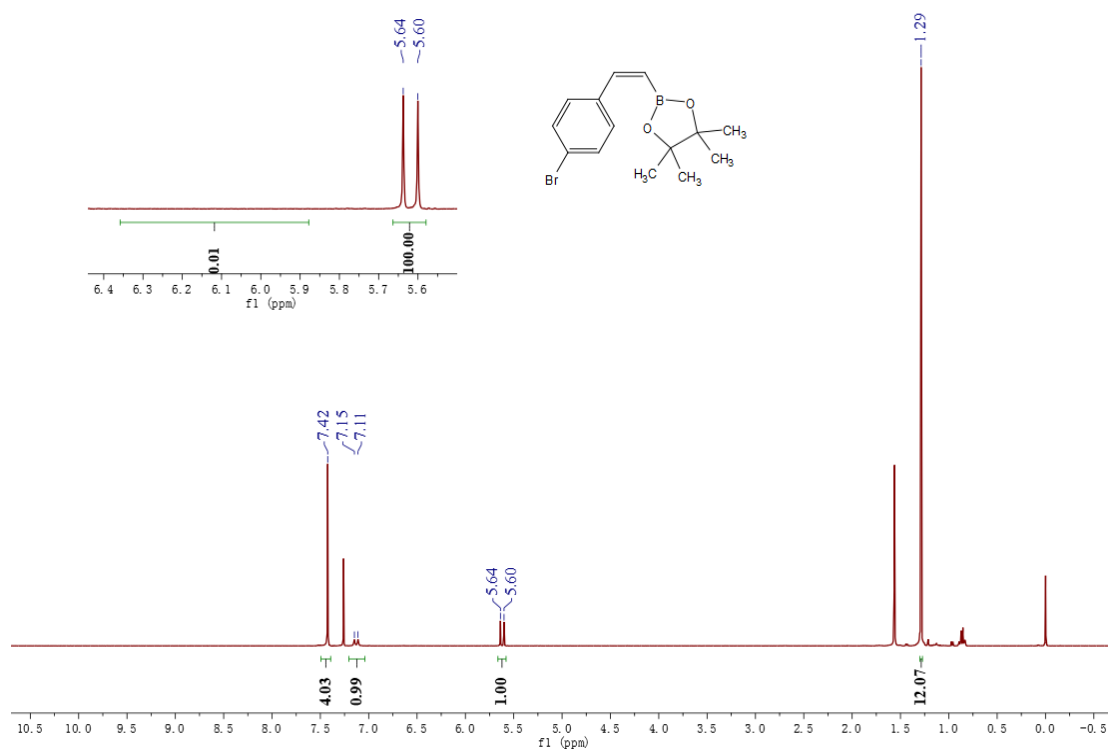

$^{13}\text{C}$  NMR (151 MHz, Chloroform-*d*) of 10b ([See procedure](#))

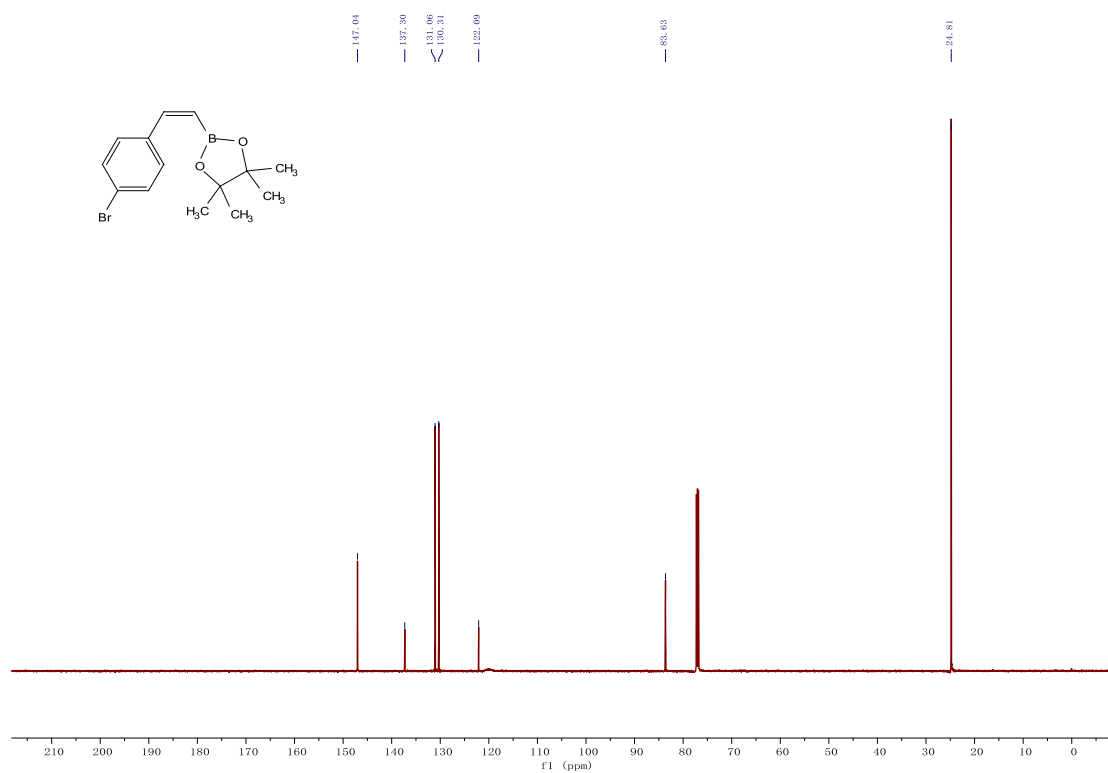

$^{11}\text{B}$  NMR (193 MHz, Chloroform-*d*) of 10b ([See procedure](#))

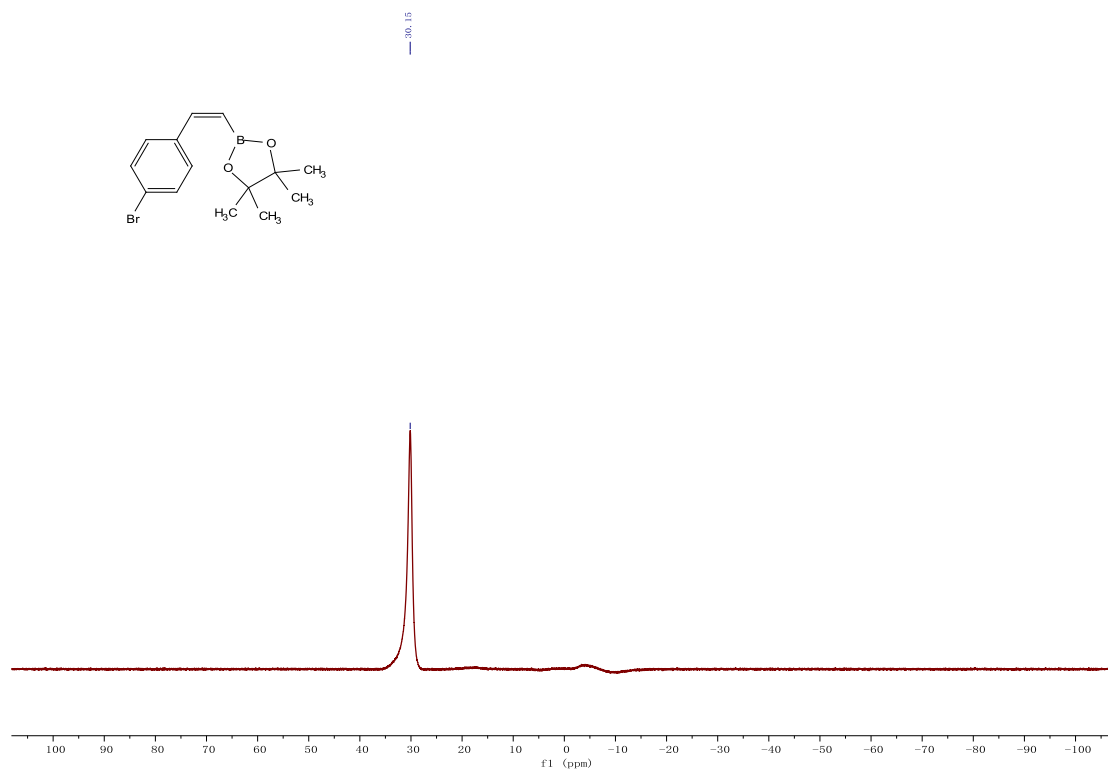

$^1\text{H}$  NMR (400 MHz, Chloroform-*d*) of 11b ([See procedure](#))

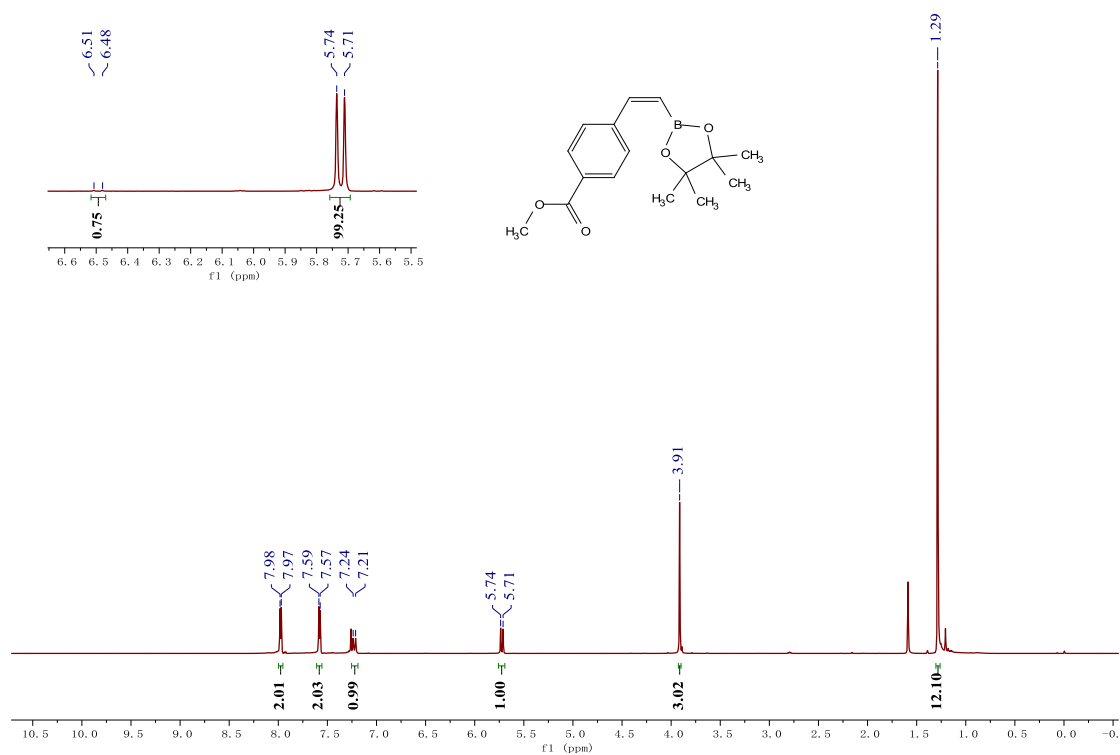

$^{13}\text{C}$  NMR (151 MHz, Chloroform-*d*) of **11b** ([See procedure](#))

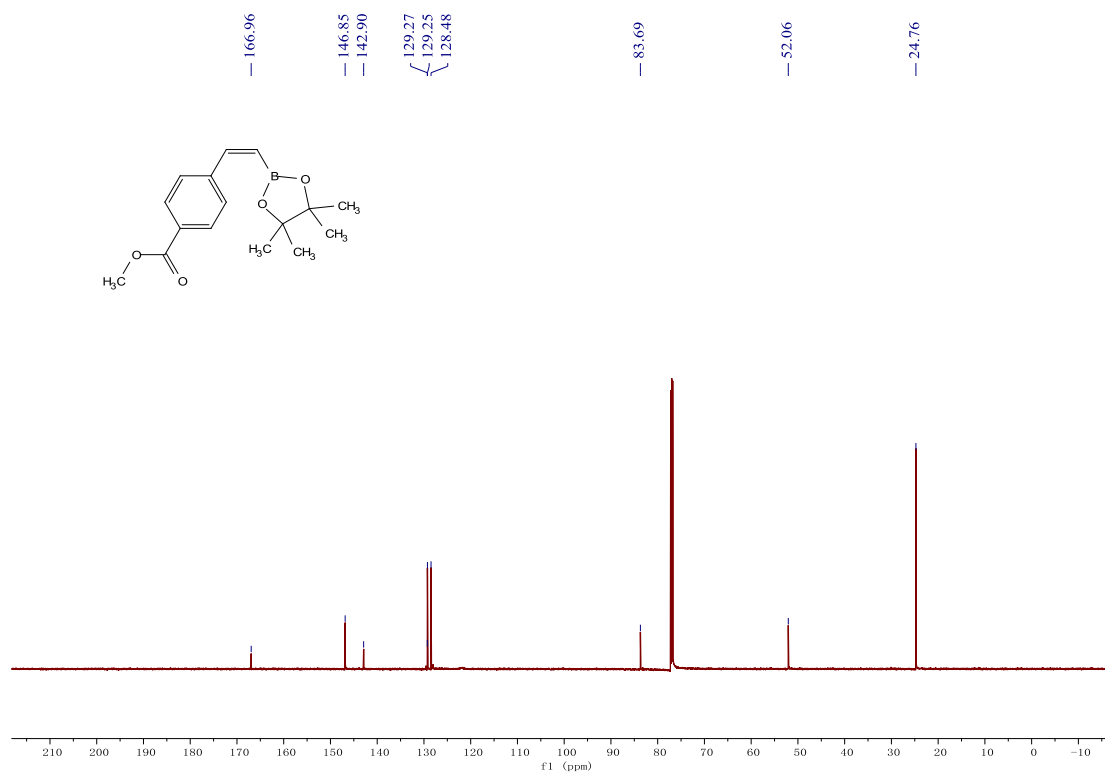

$^{11}\text{B}$  NMR (193 MHz, Chloroform-*d*) of **11b** ([See procedure](#))

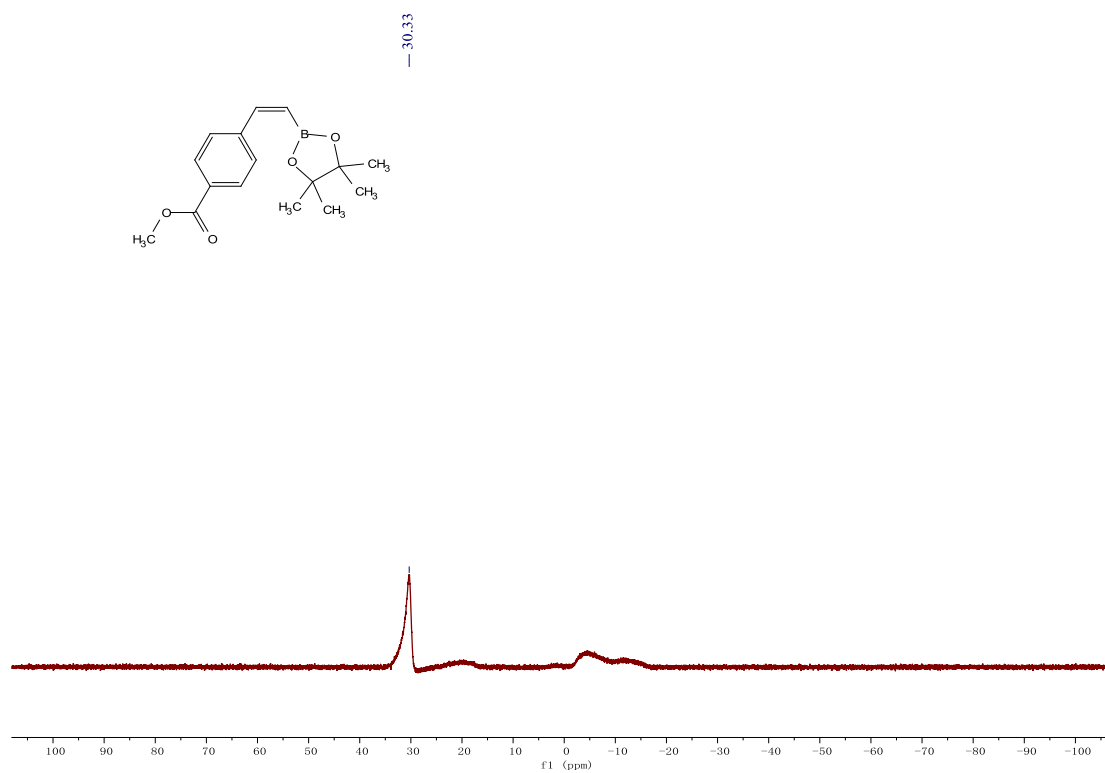

$^1\text{H}$  NMR (400 MHz, Chloroform-*d*) of 12b ([See procedure](#))

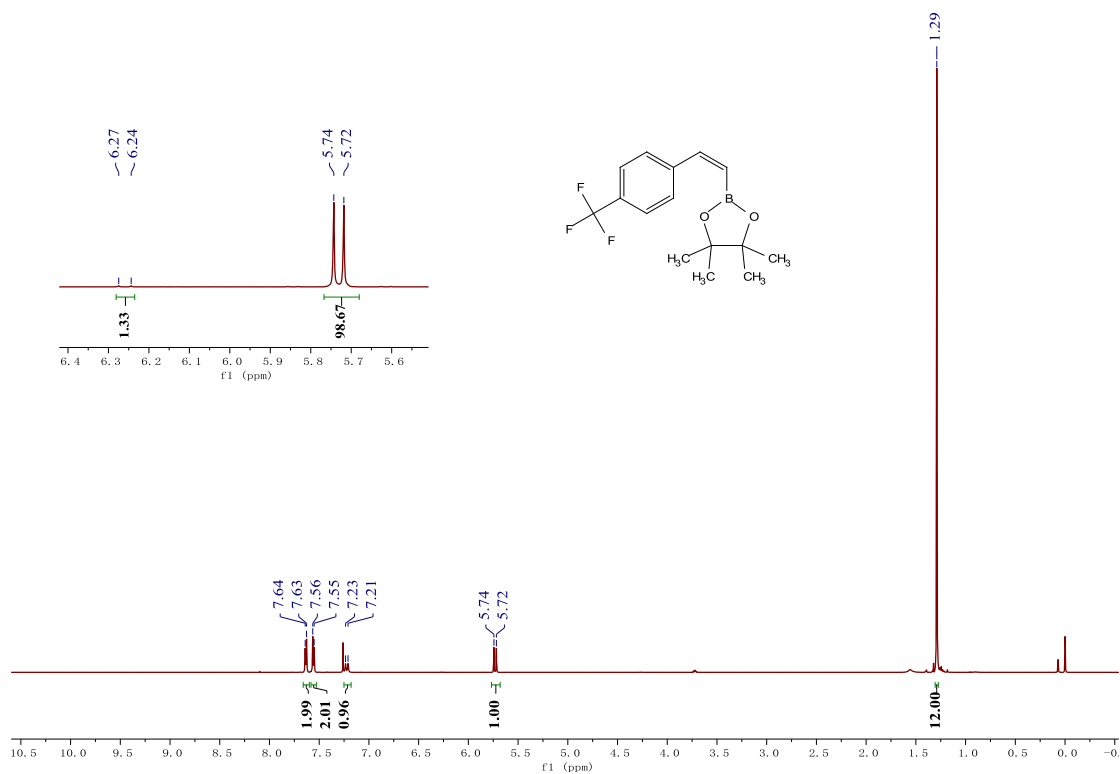

$^{13}\text{C}$  NMR (151 MHz, Chloroform-*d*) of 12b ([See procedure](#))

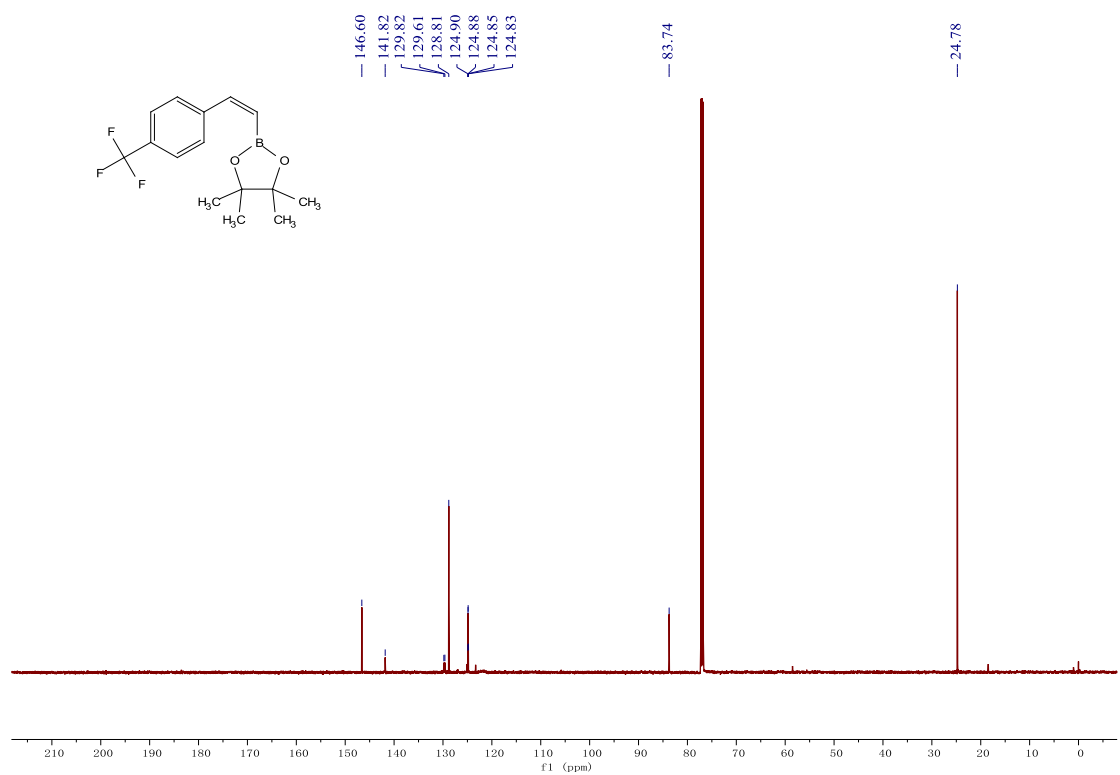

$^{11}\text{B}$  NMR (193 MHz, Chloroform-*d*) of **12b** ([See procedure](#))

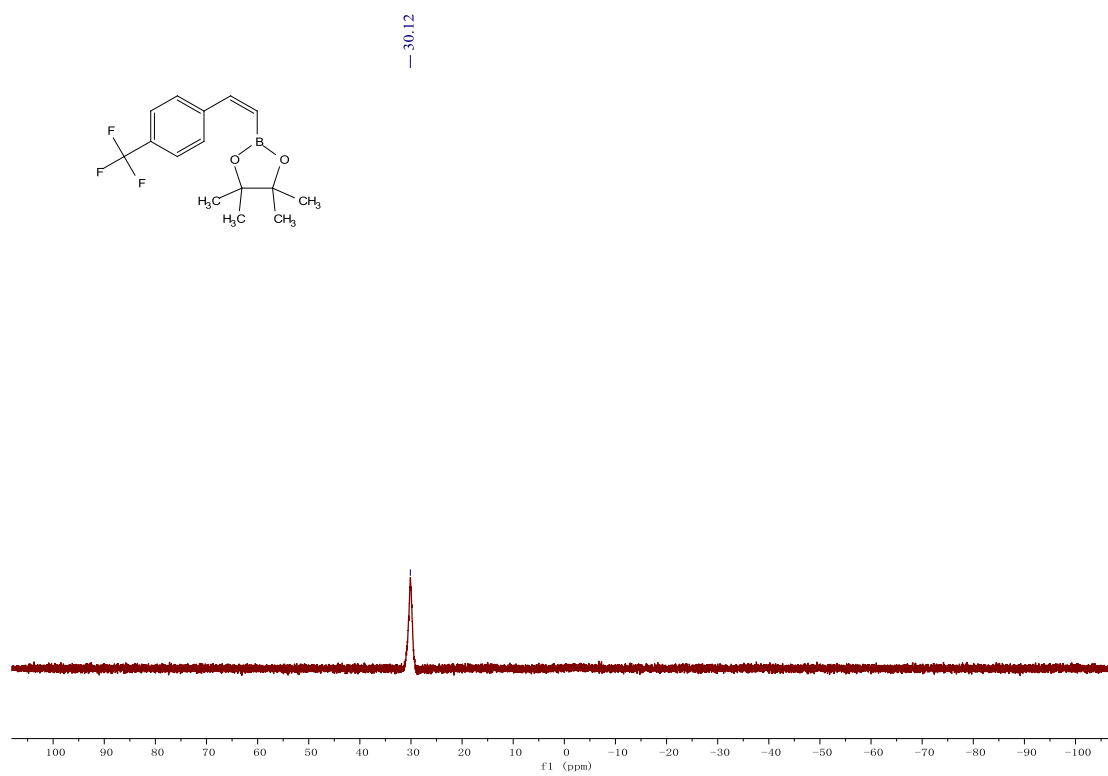

$^{19}\text{F}$  NMR (565 MHz, Chloroform-*d*) of **12b** ([See procedure](#))

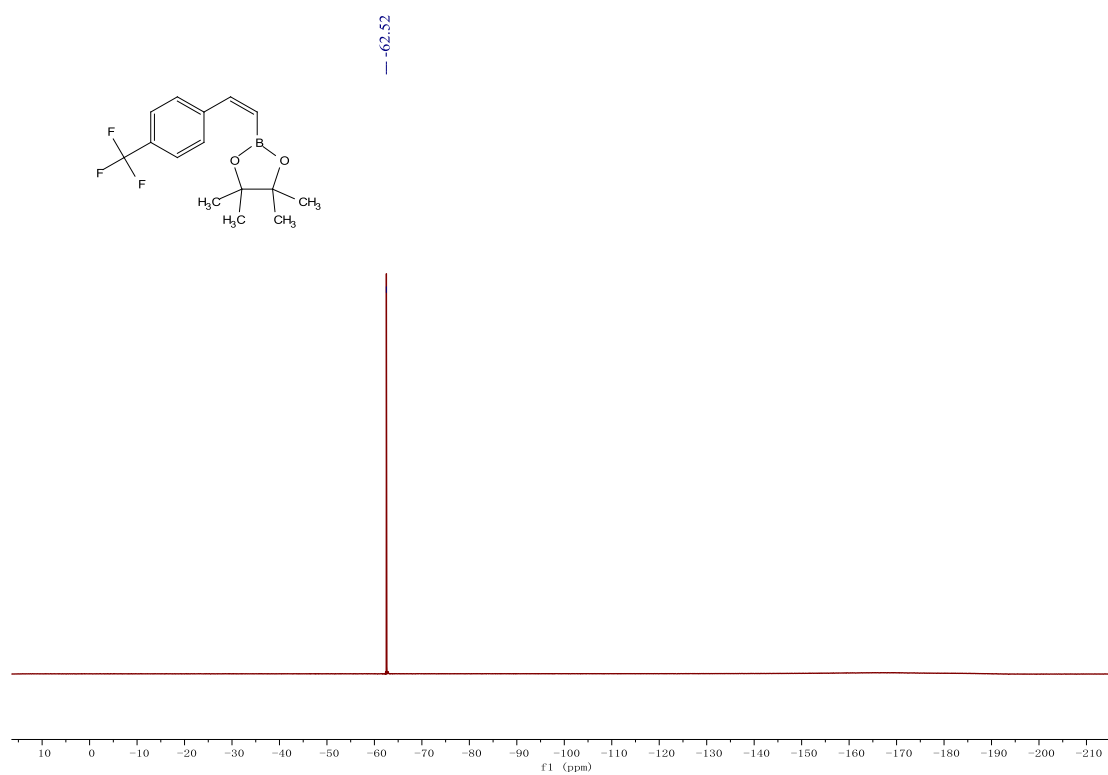

$^1\text{H}$  NMR (400 MHz, Chloroform-*d*) of **13b** ([See procedure](#))

hp-wj1-513-4-chr. 10. f1.d

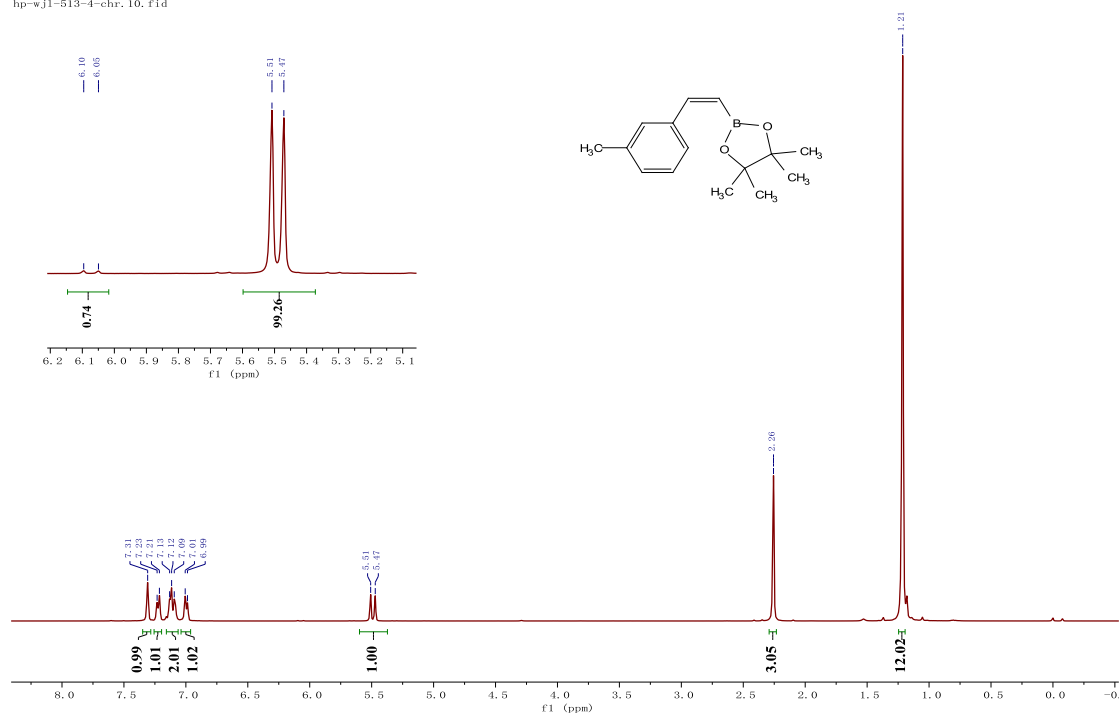

$^{13}\text{C}$  NMR (151 MHz, Chloroform-*d*) of **13b** ([See procedure](#))

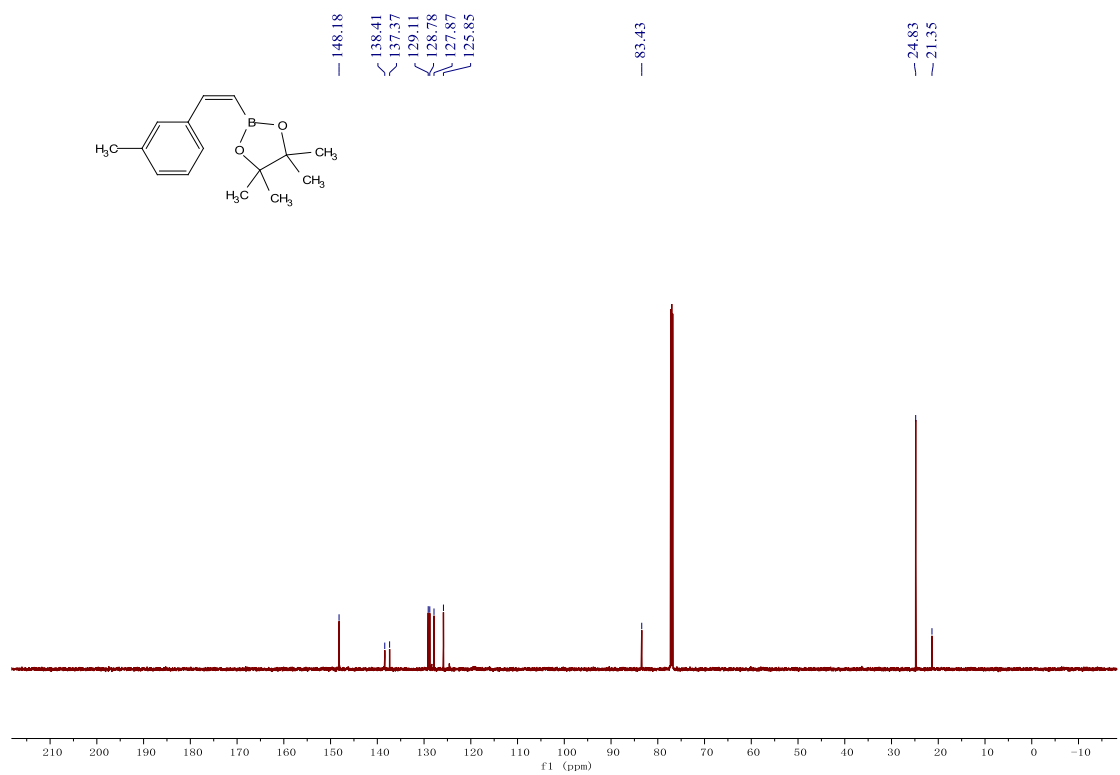

$^{11}\text{B}$  NMR (193 MHz, Chloroform-*d*) of **13b** ([See procedure](#))

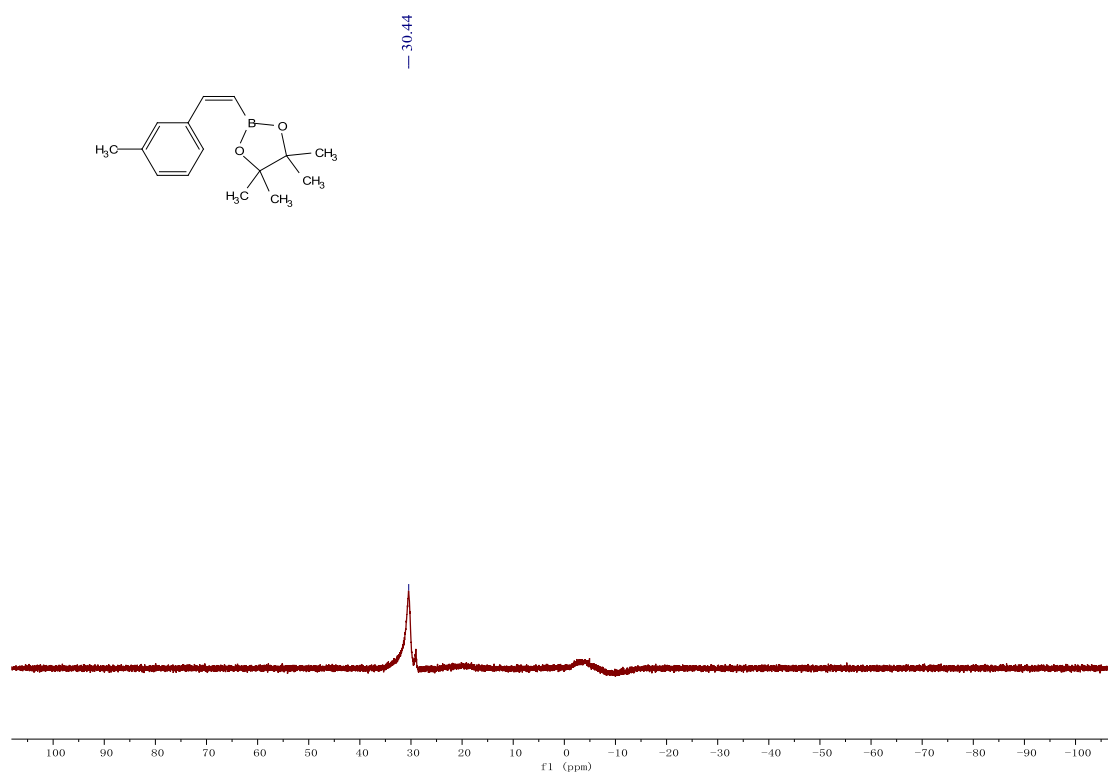

$^1\text{H}$  NMR (400 MHz, Chloroform-*d*) of **14b** ([See procedure](#))

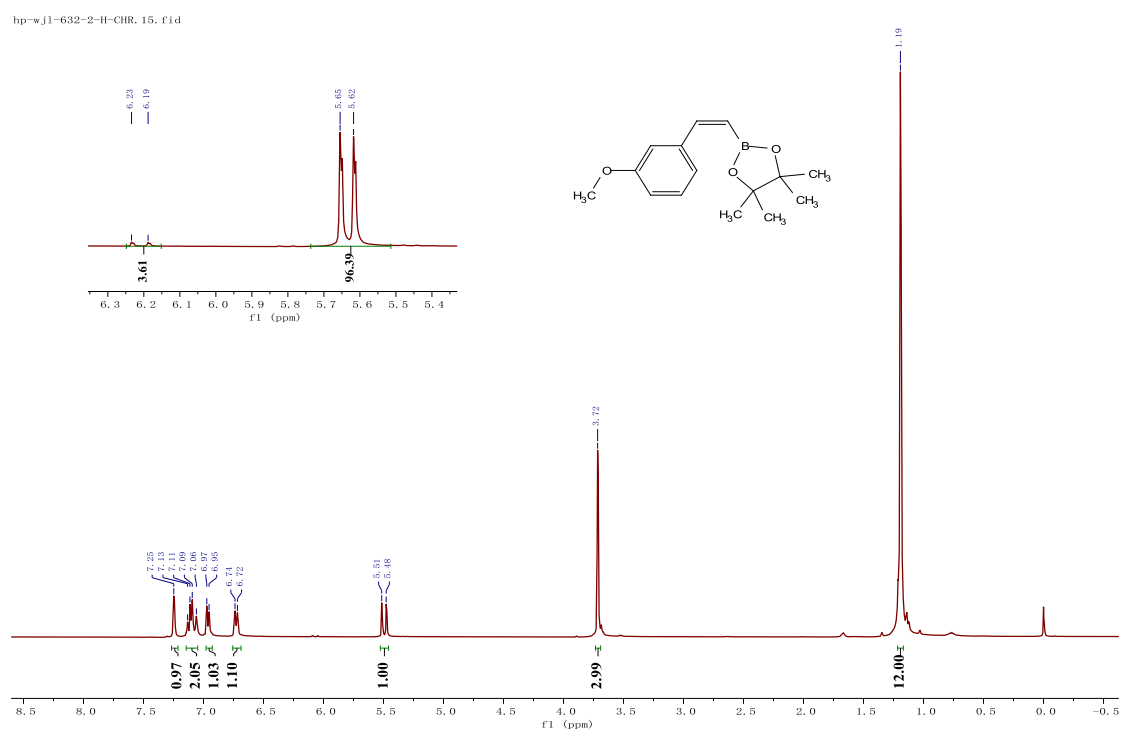



$^1\text{H}$  NMR (400 MHz, Chloroform-*d*) of **15b** ([See procedure](#))

hp-wj1-642-6-chr. 10. fid

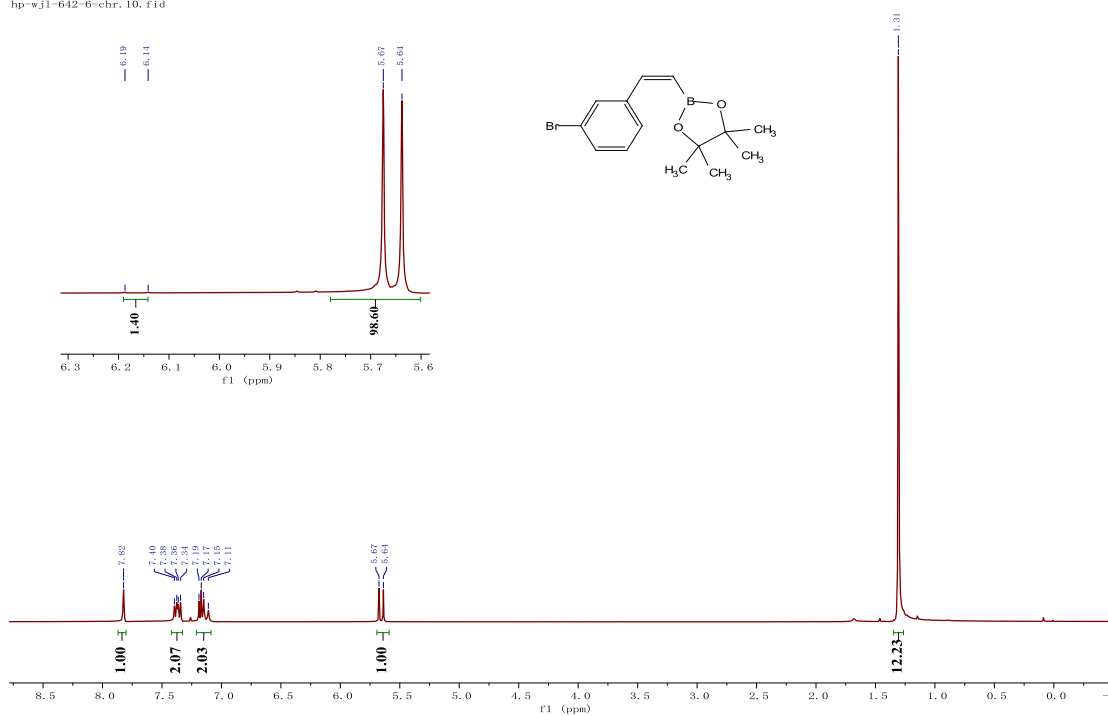

$^{13}\text{C}$  NMR (151 MHz, Chloroform-*d*) of **15b** ([See procedure](#))

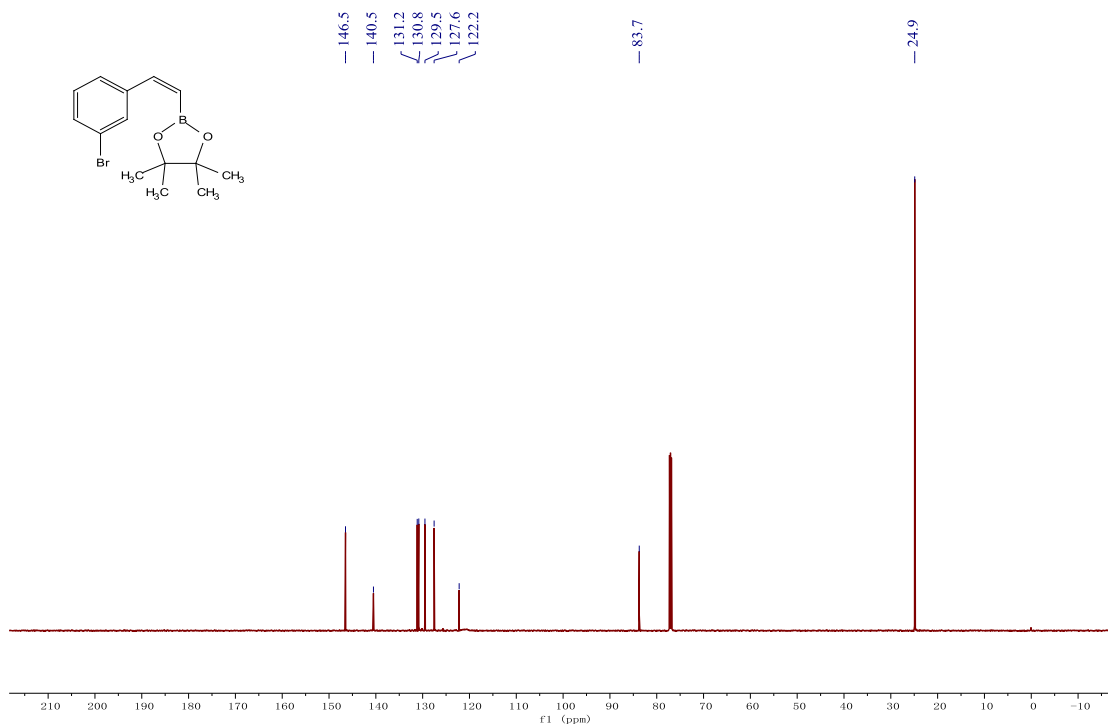

$^{11}\text{B}$  NMR (193 MHz, Chloroform-*d*) of **15b** ([See procedure](#))

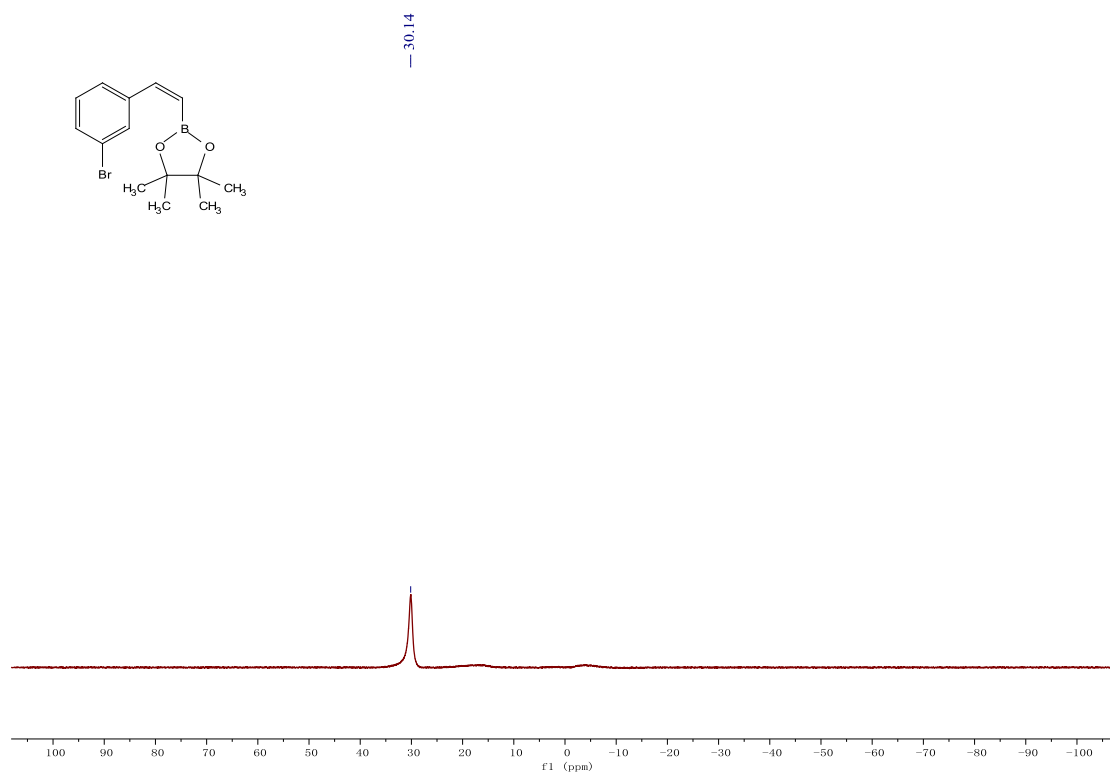

<sup>1</sup>H NMR (400 MHz, Chloroform-*d*) of 16b ([See procedure](#))

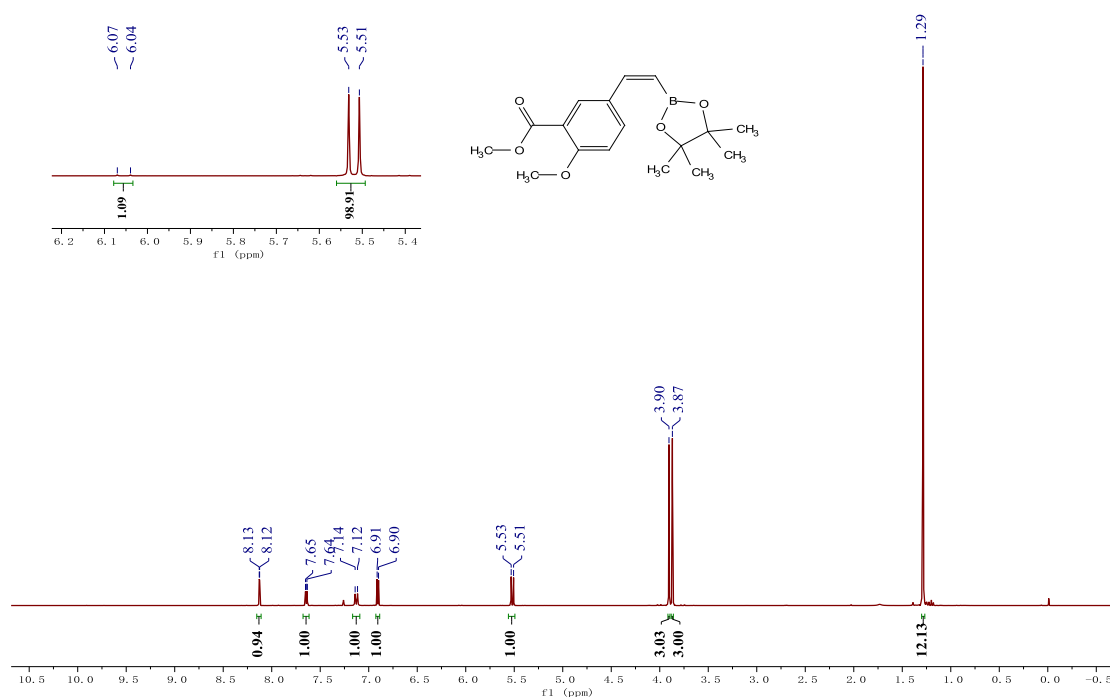

<sup>13</sup>C NMR (151 MHz, Chloroform-*d*) of 16b ([See procedure](#))

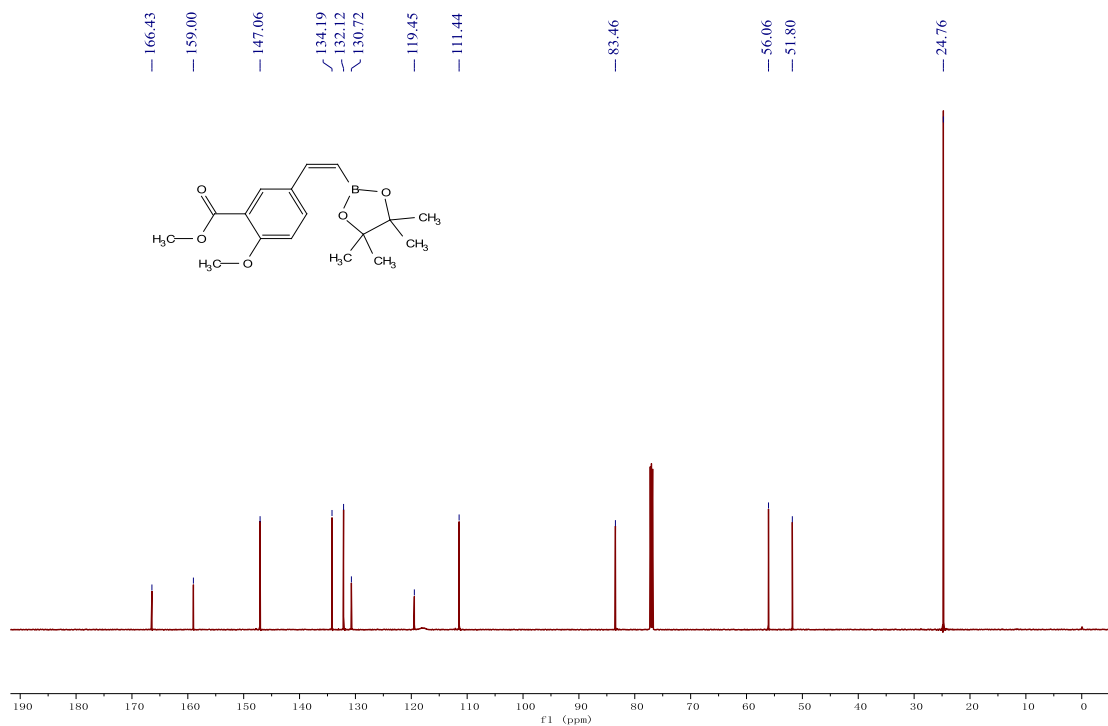

$^{11}\text{B}$  NMR (193 MHz, Chloroform-*d*) of **16b** ([See procedure](#))

— 30.31

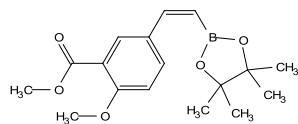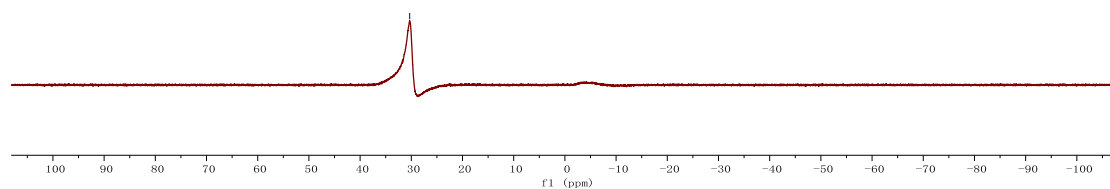

$^1\text{H}$  NMR (400 MHz, Chloroform-*d*) of **17b** ([See procedure](#))

hp-wj1-513-5-chr: 10, f1.d

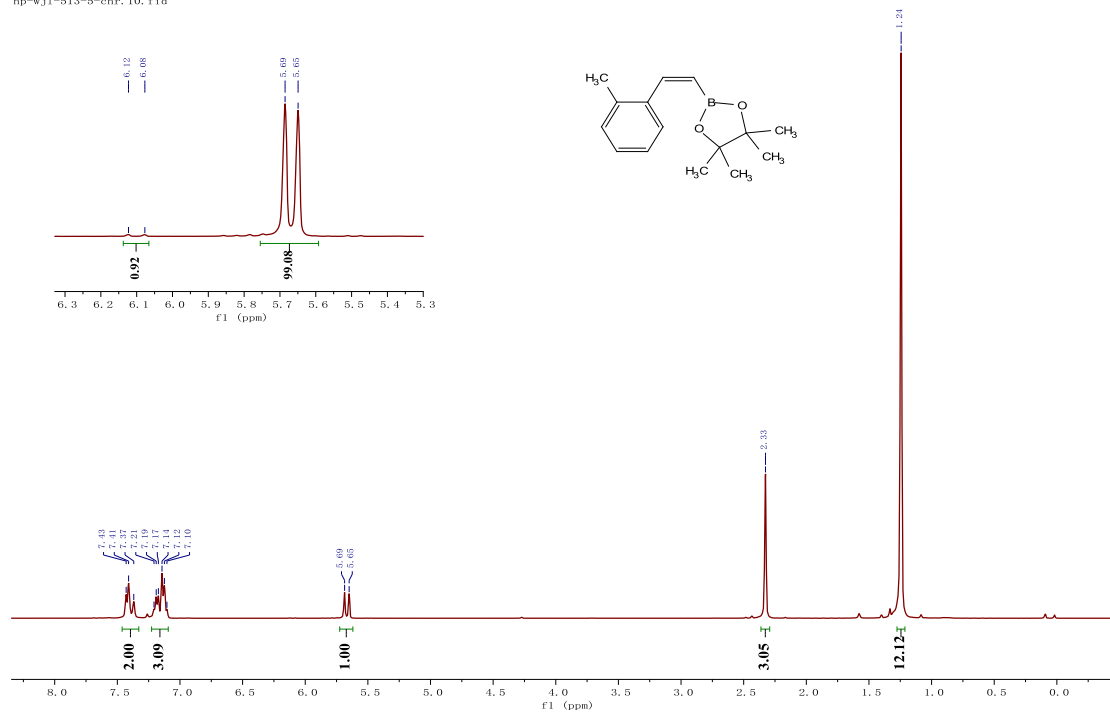

$^1\text{H NMR}$  (400 MHz, Chloroform-*d*) of 18b ([See procedure](#))

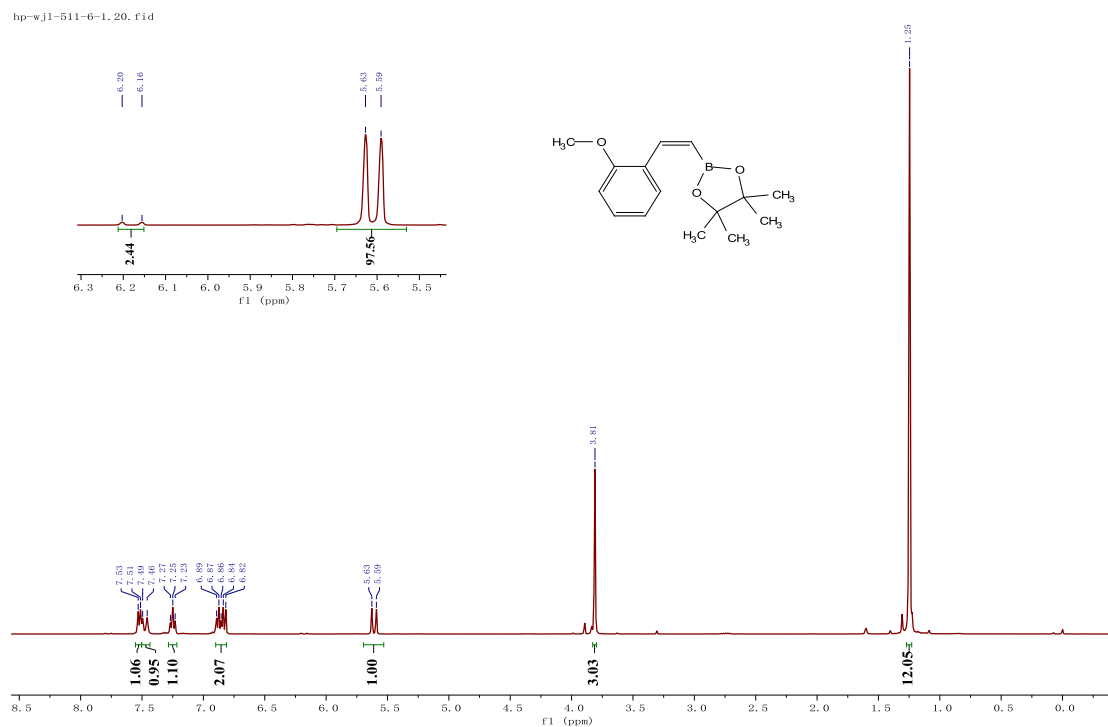

$^1\text{H NMR}$  (400 MHz, Chloroform-*d*) of 19b ([See procedure](#))

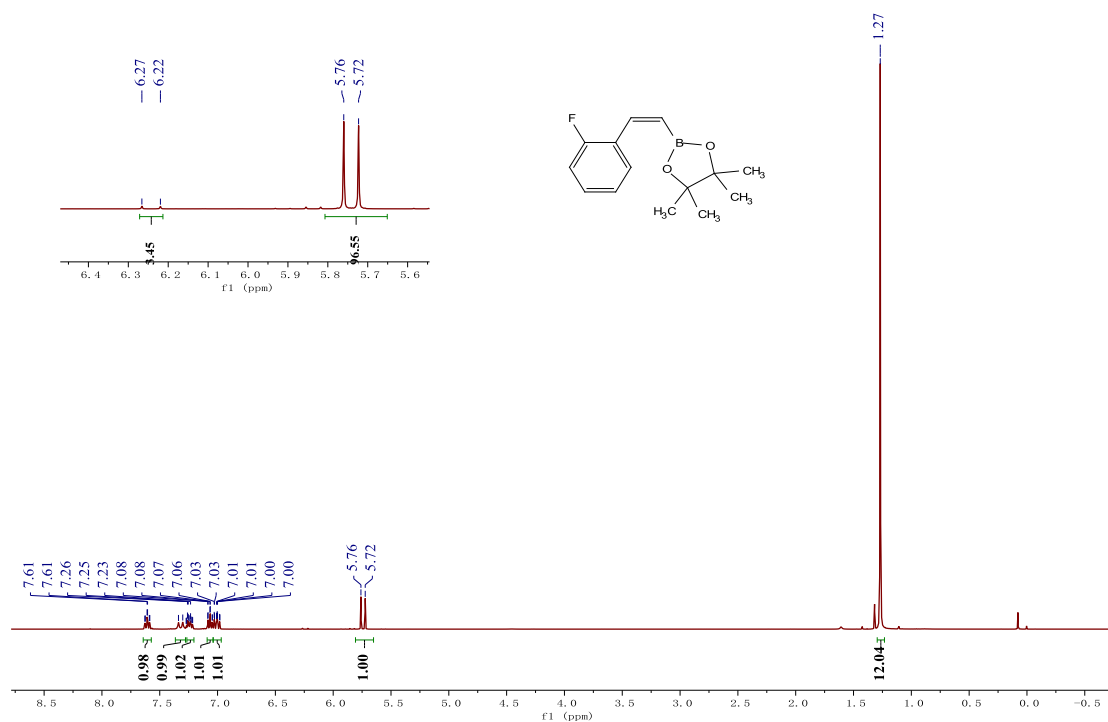

$^{13}\text{C}$  NMR (151 MHz, Chloroform-*d*) of **19b** ([See procedure](#))

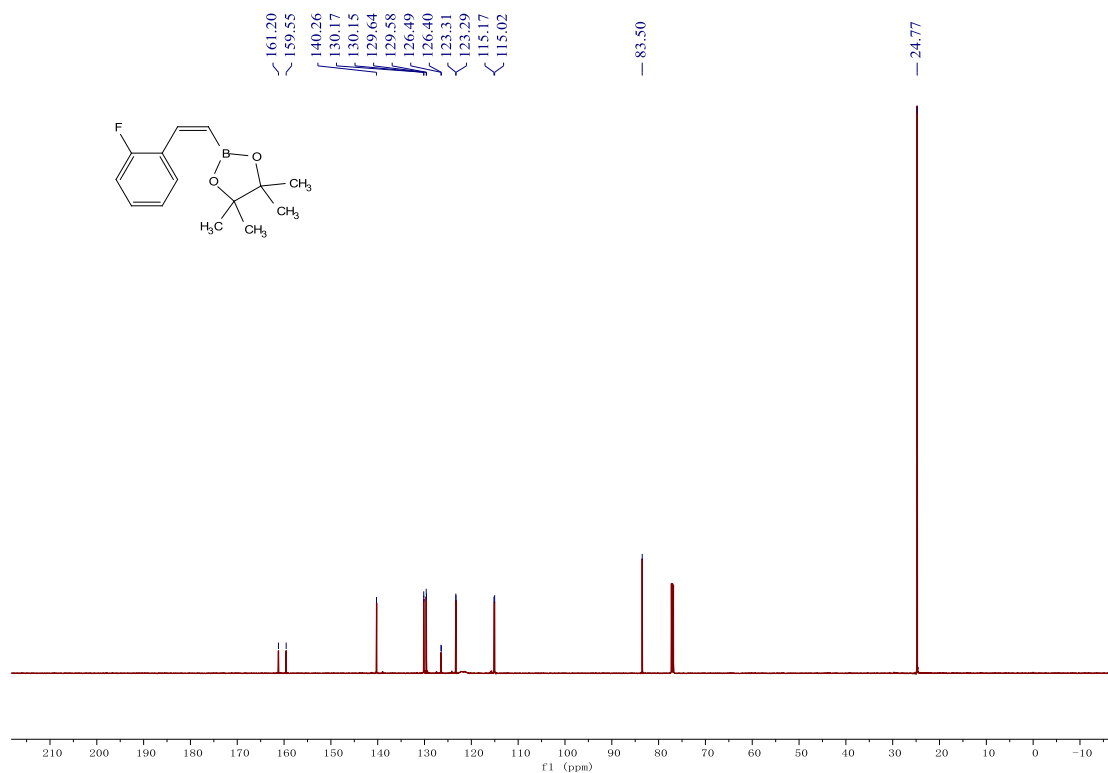

$^{11}\text{B}$  NMR (193 MHz, Chloroform-*d*) of **19b** ([See procedure](#))

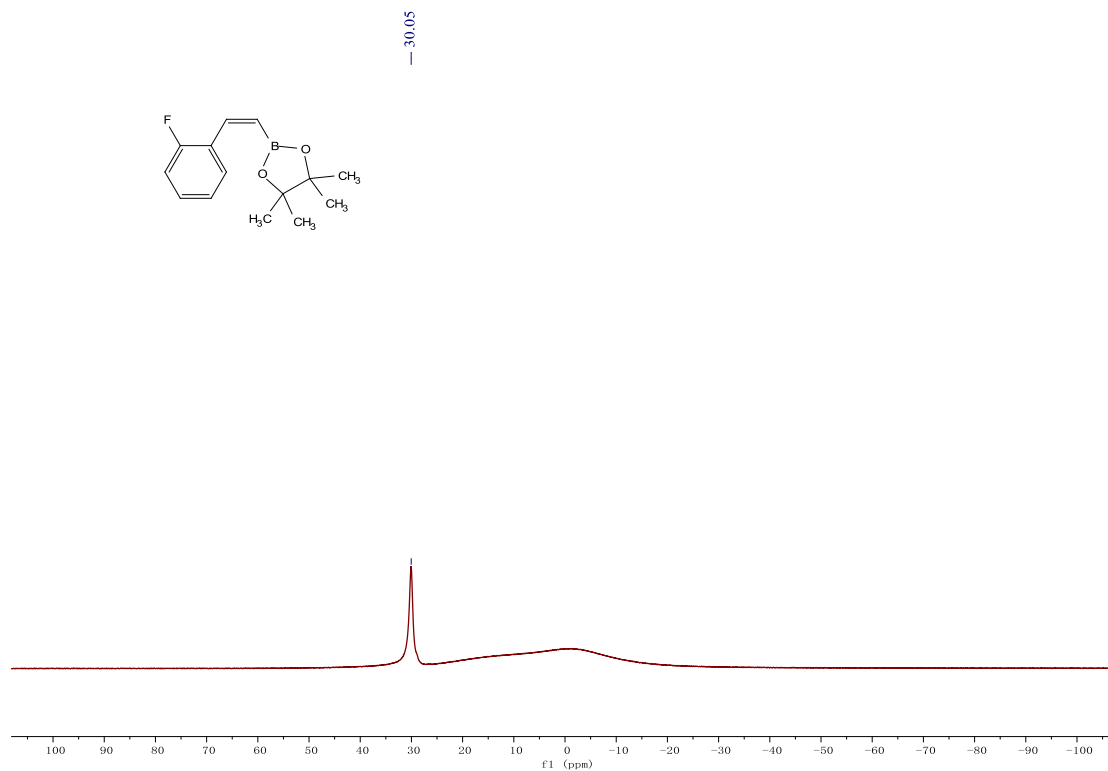

$^{19}\text{F}$  NMR (565 MHz, Chloroform-*d*) of 19b ([See procedure](#))

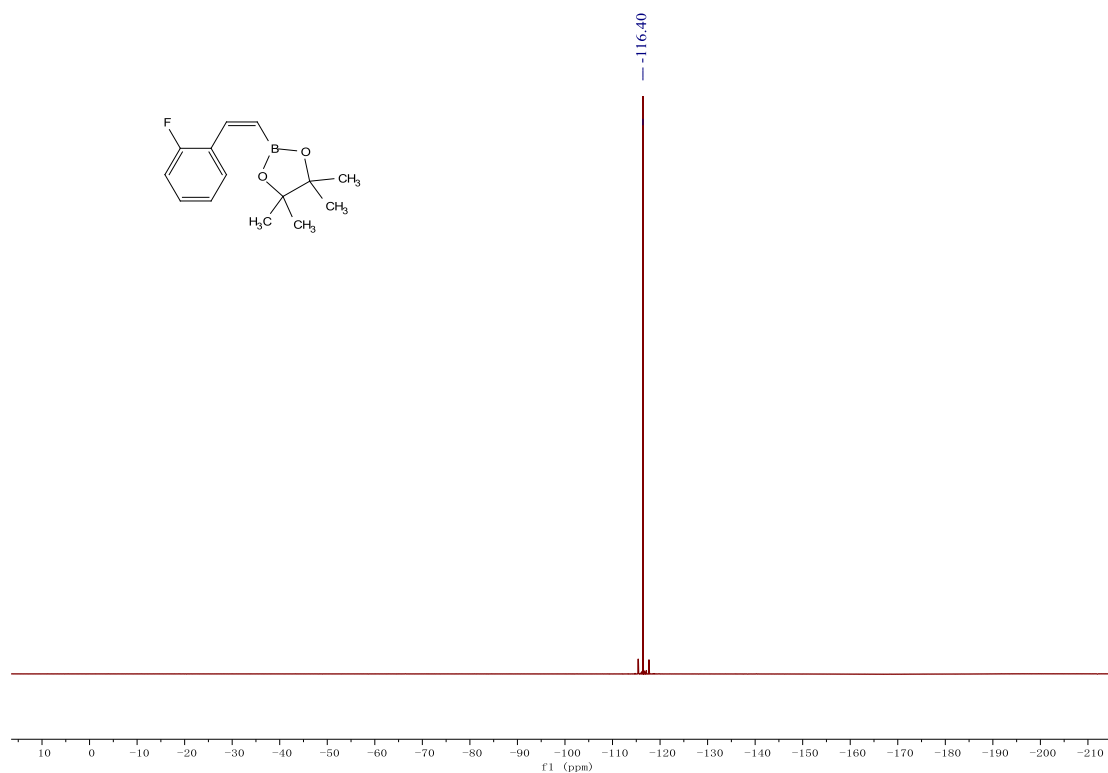

$^1\text{H}$  NMR (400 MHz, Chloroform-*d*) of 20b ([See procedure](#))

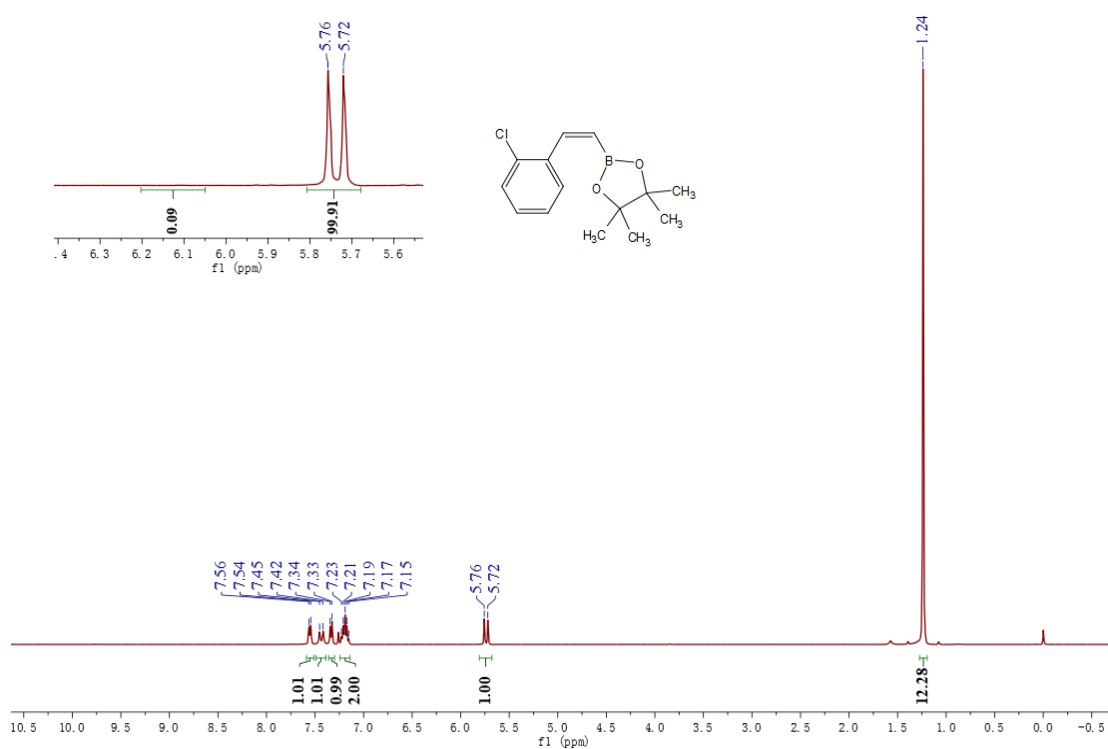

$^{13}\text{C}$  NMR (101 MHz, Chloroform-*d*) of **20b** (*See procedure*)

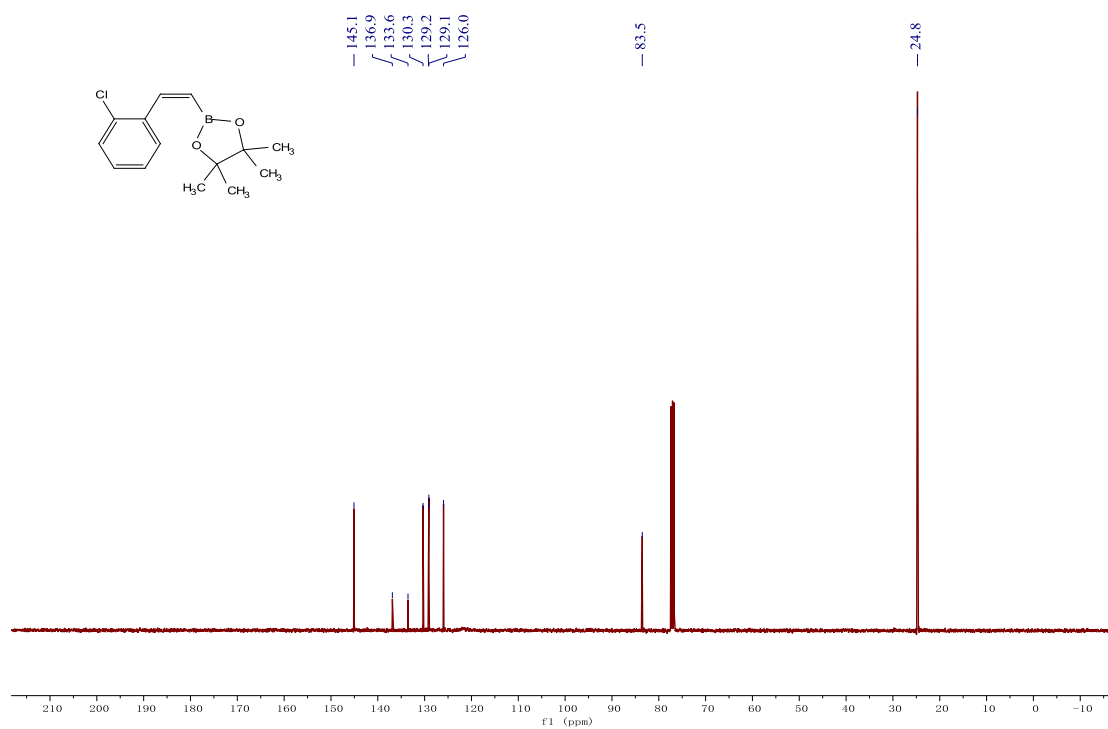

$^{11}\text{B}$  NMR (128 MHz, Chloroform-*d*) of **20b** (*See procedure*)

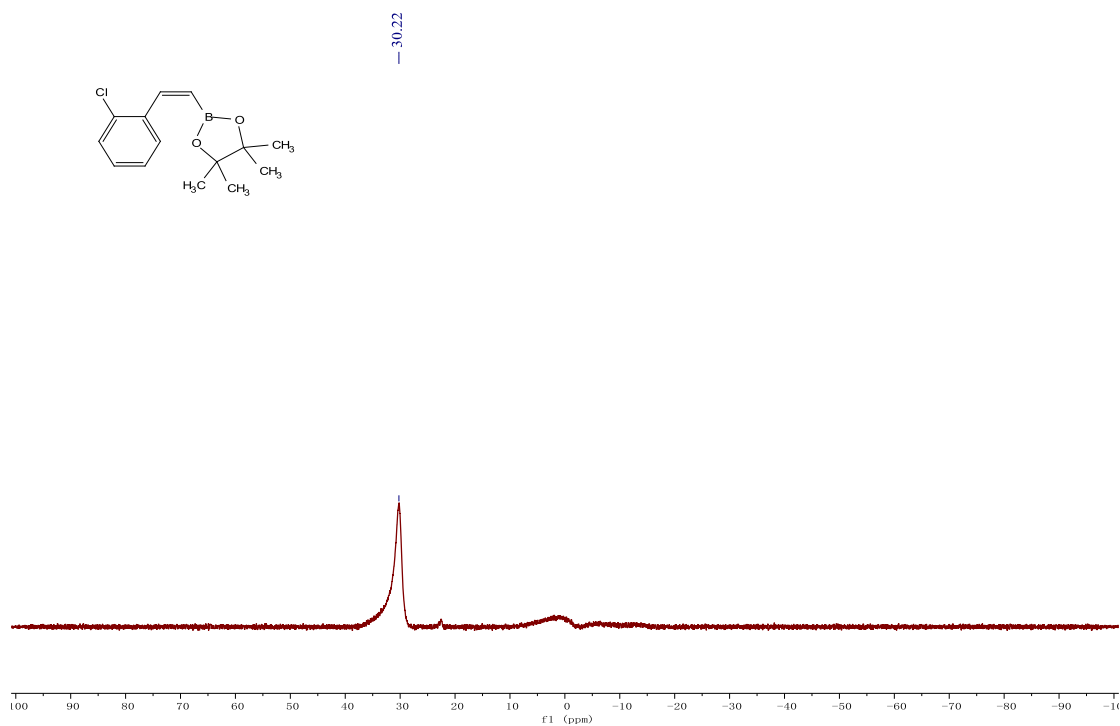



$^1\text{H}$  NMR (400 MHz, Chloroform-*d*) of 21b ([See procedure](#))

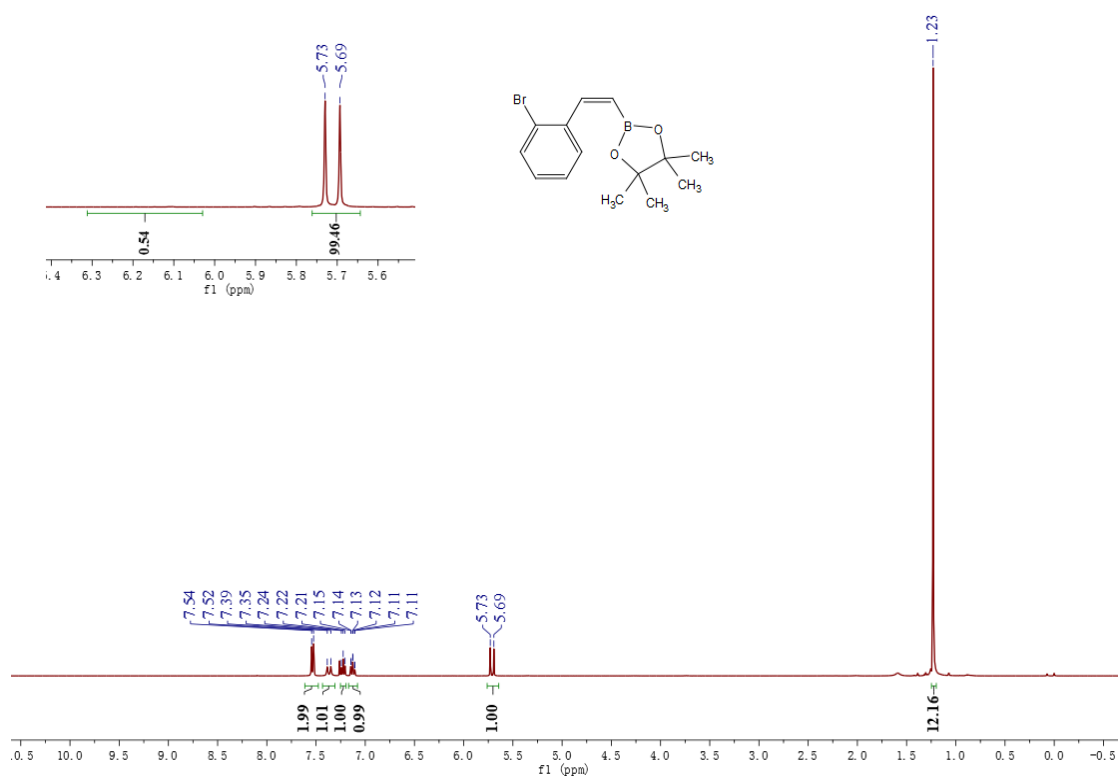

$^{13}\text{C}$  NMR (151 MHz, Chloroform-*d*) of 21b ([See procedure](#))

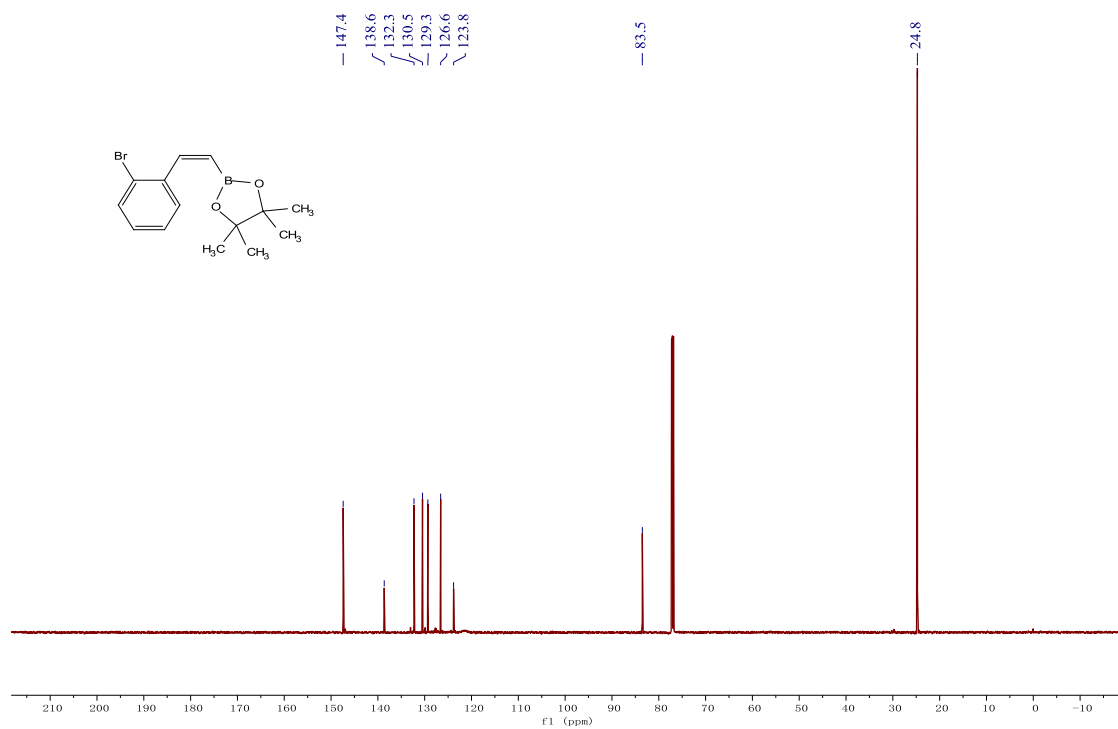

$^{11}\text{B}$  NMR (193 MHz, Chloroform-*d*) of 21b ([See procedure](#))

— 30.1

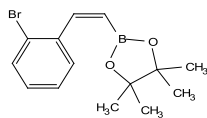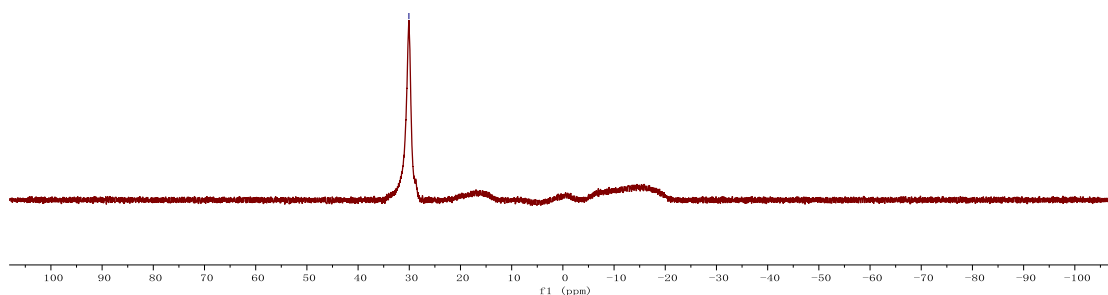

$^1\text{H}$  NMR (400 MHz, Chloroform-*d*) of 22b ([See procedure](#))

HP-WJL-734-1-h-chr. 10. fid

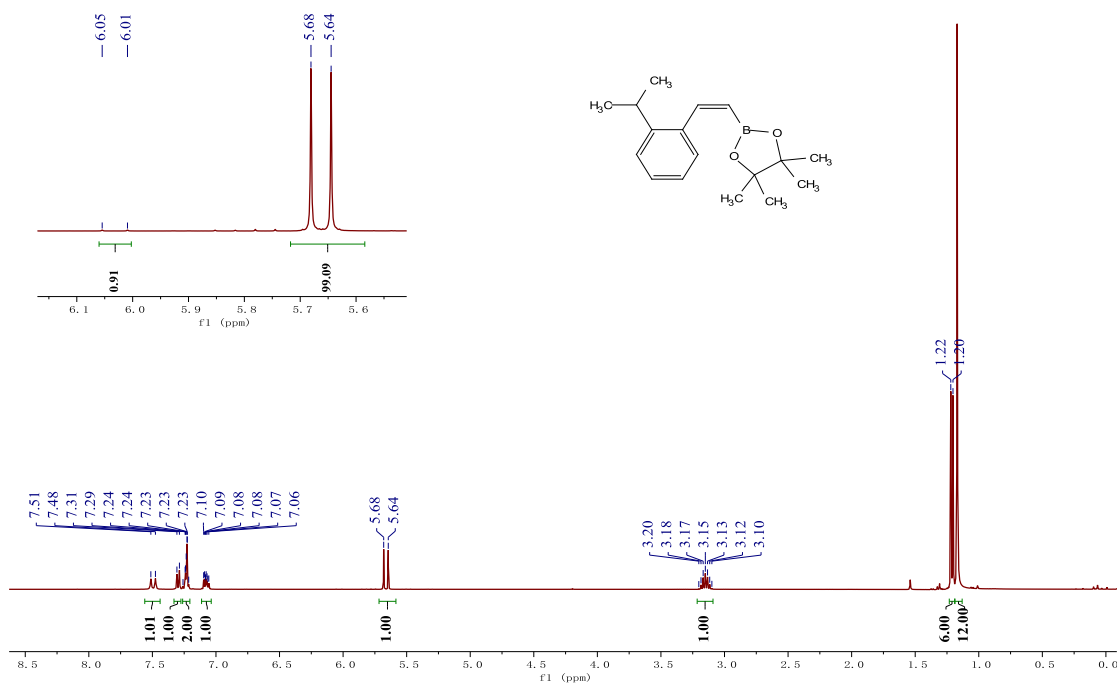

$^{13}\text{C}$  NMR (101 MHz, Chloroform-*d*) of **22b** (*See procedure*)

hp-wj1-734-1-c-chr. 10. fid

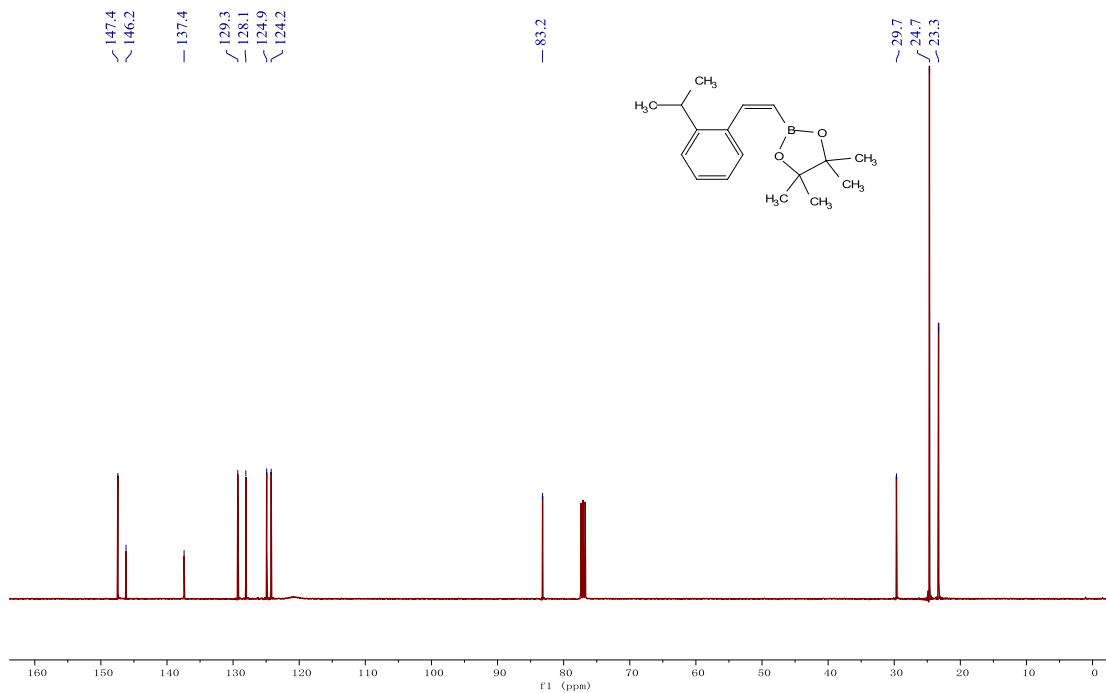

$^{11}\text{B}$  NMR (128 MHz, Chloroform-*d*) of **22b** (*See procedure*)

$^{11}\text{B}$  NMR (128 MHz,  $\text{CDCl}_3$ )  $\delta$  30.6.

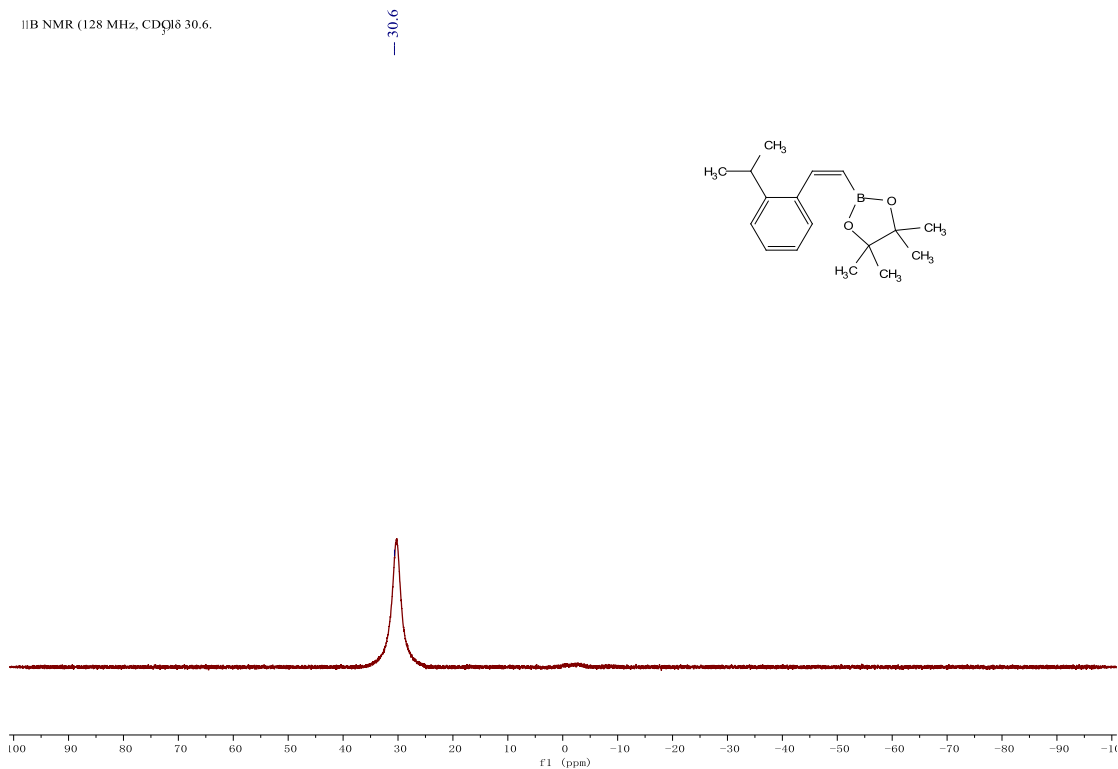

$^1\text{H}$  NMR (600 MHz, Chloroform-*d*) of 23b ([See procedure](#))

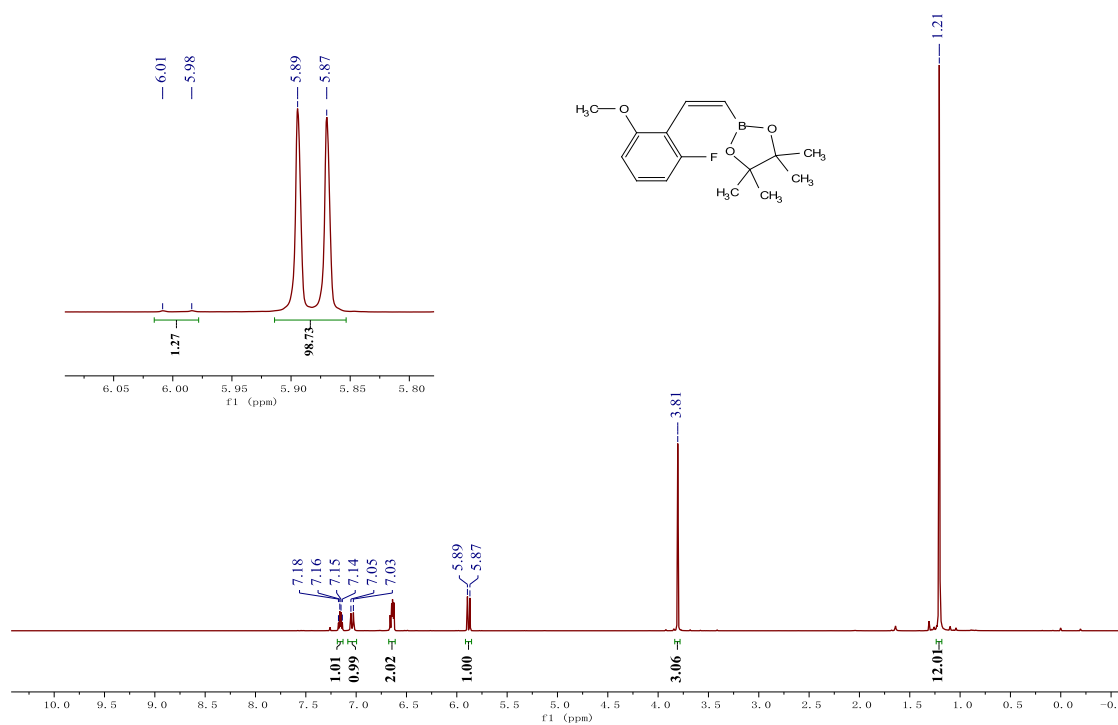

$^{13}\text{C}$  NMR (151 MHz, Chloroform-*d*) of 23b ([See procedure](#))

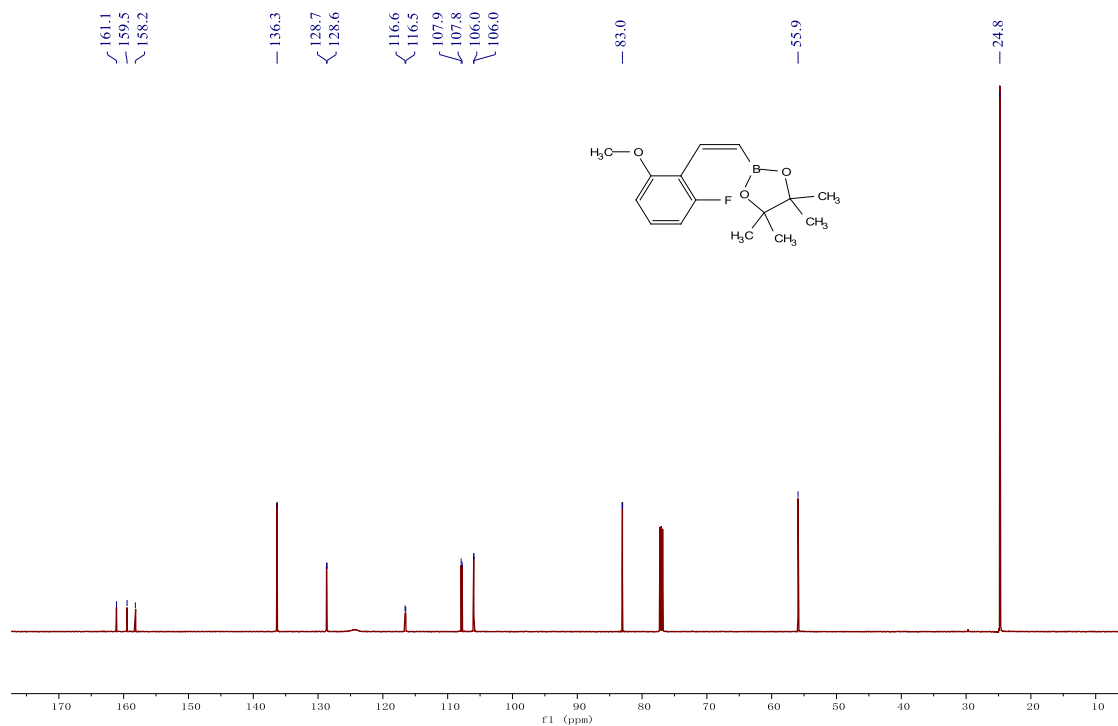

$^{11}\text{B}$  NMR (193 MHz, Chloroform-*d*) of **23b** ([See procedure](#))

-29.6

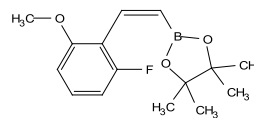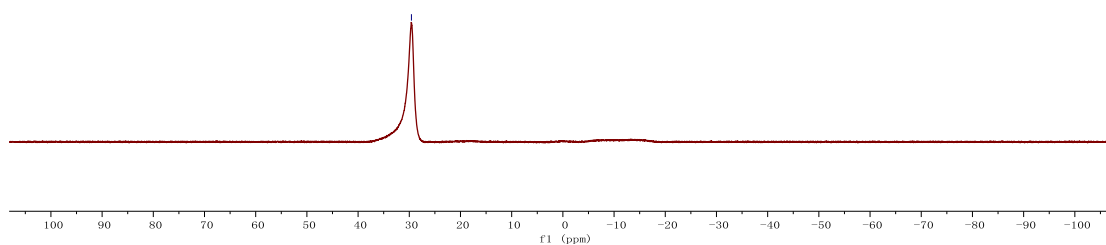

$^{19}\text{F}$  NMR (565 MHz, Chloroform-*d*) of **23b** ([See procedure](#))

-113.43

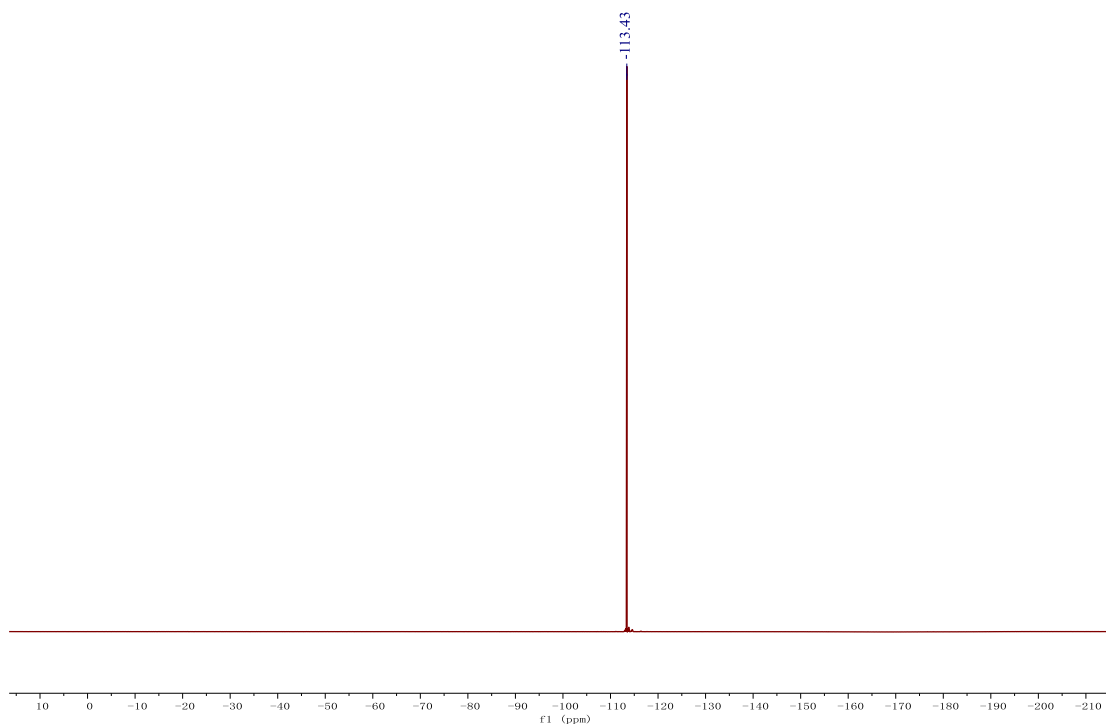

$^1\text{H}$  NMR (400 MHz, Chloroform-*d*) of 24b ([See procedure](#))

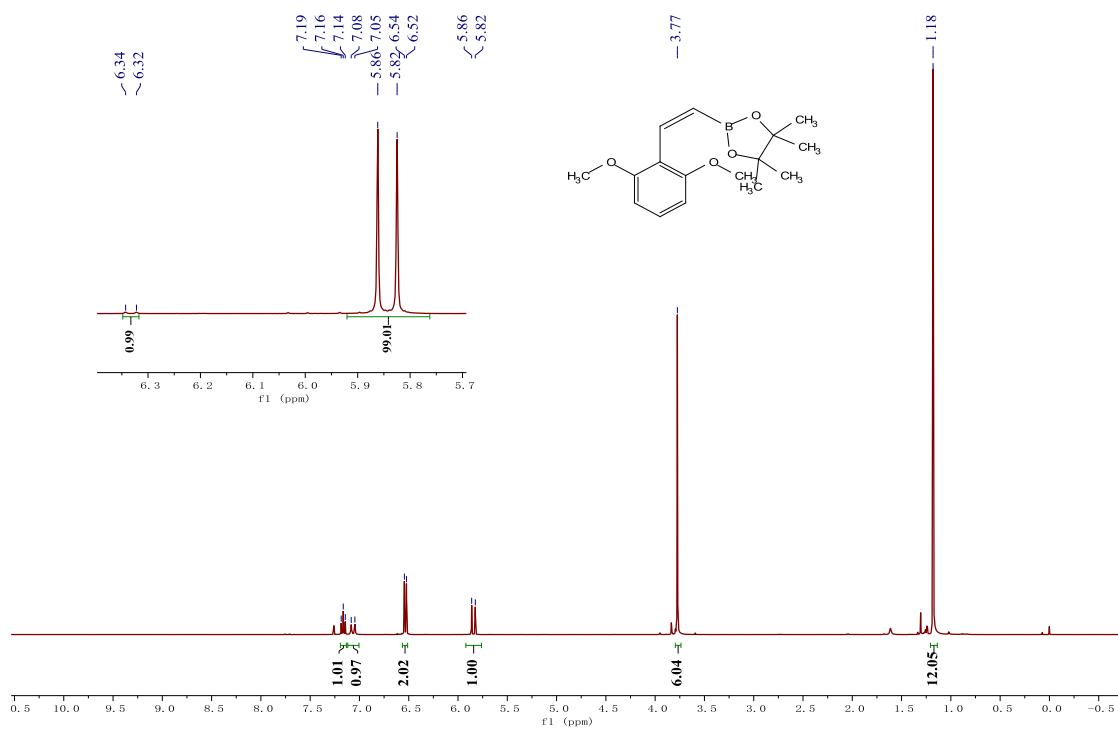

$^{13}\text{C}$  NMR (101 MHz, Chloroform-*d*) of 24b ([See procedure](#))

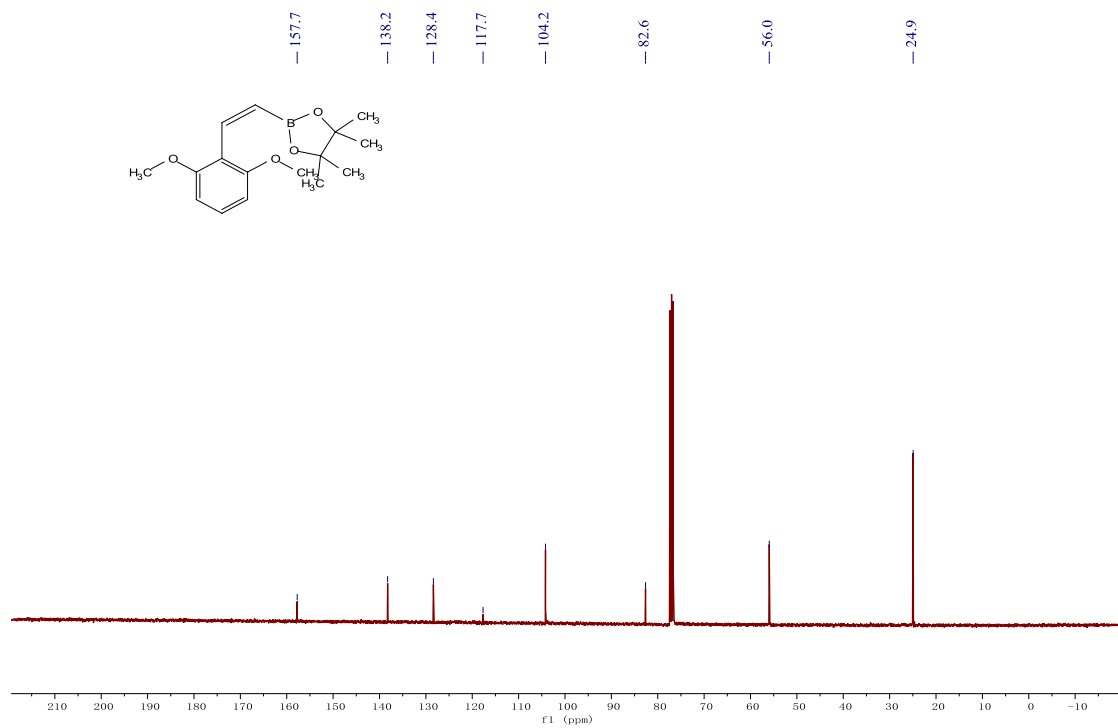

$^{11}\text{B}$  NMR (128 MHz, Chloroform-*d*) of 24b ([See procedure](#))

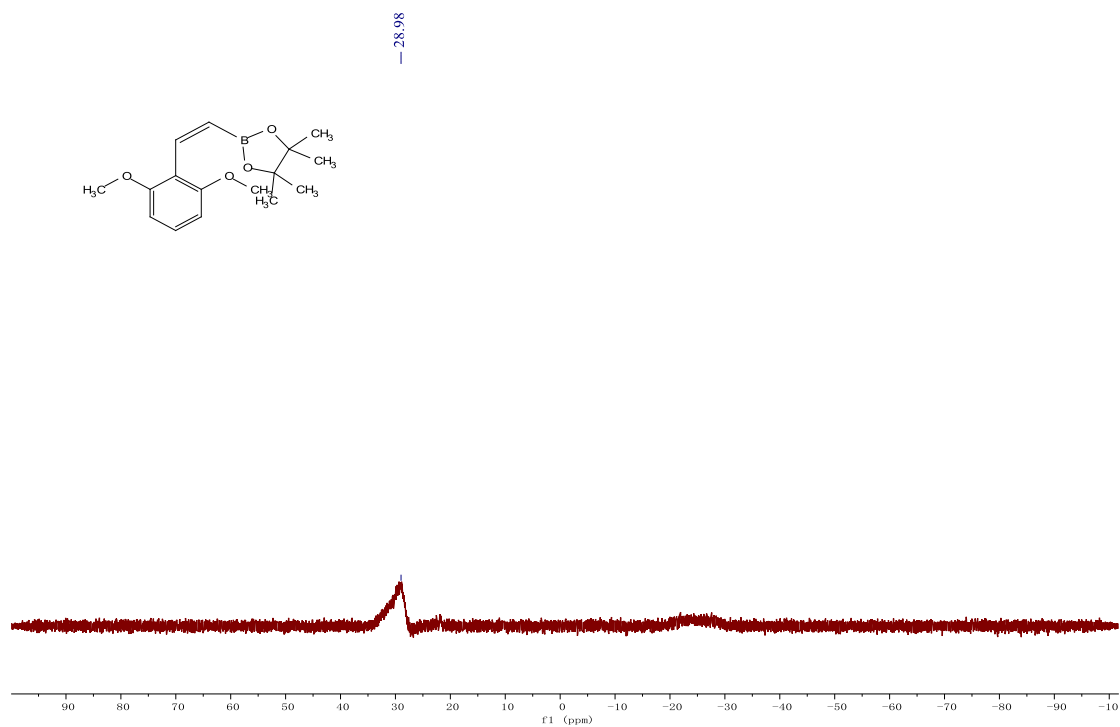

$^1\text{H}$  NMR (600 MHz, Chloroform-*d*) of 25b ([See procedure](#))

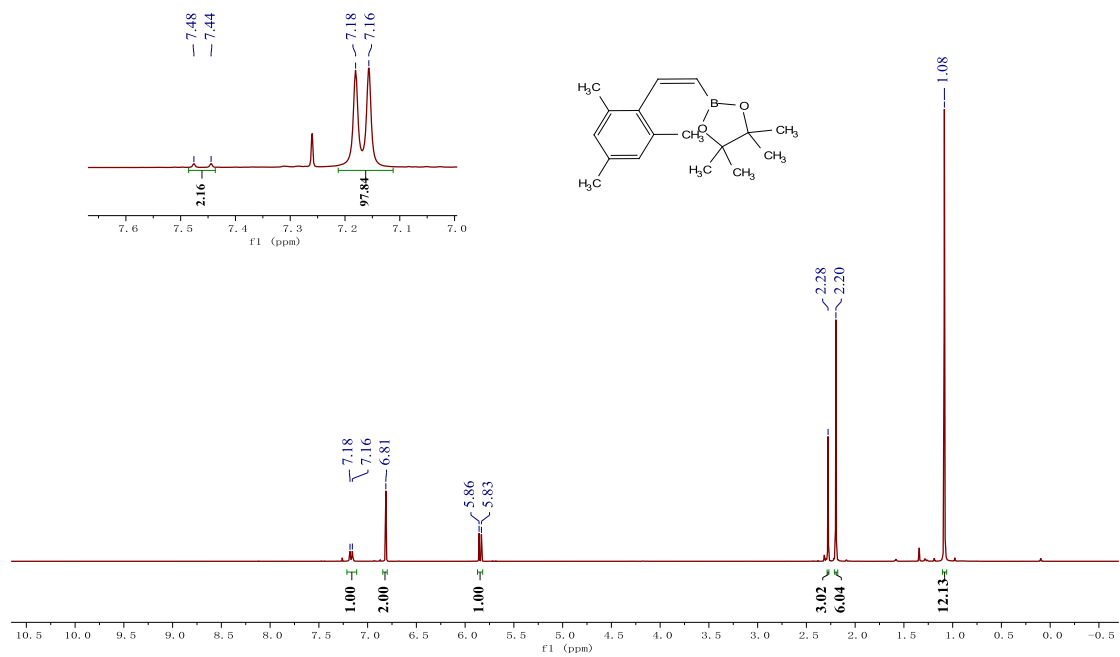

$^{13}\text{C}$  NMR (151 MHz, Chloroform-*d*) of **25b** (*See procedure*)

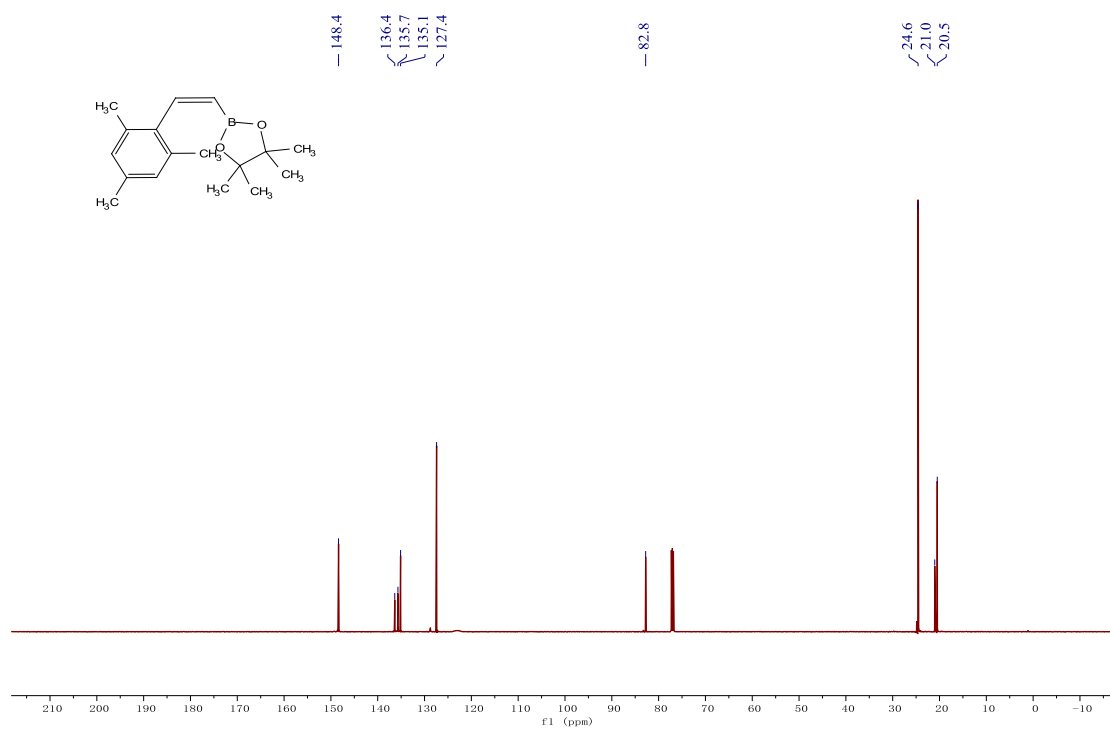

$^{11}\text{B}$  NMR (128 MHz, Chloroform-*d*) of **25b** (*See procedure*)

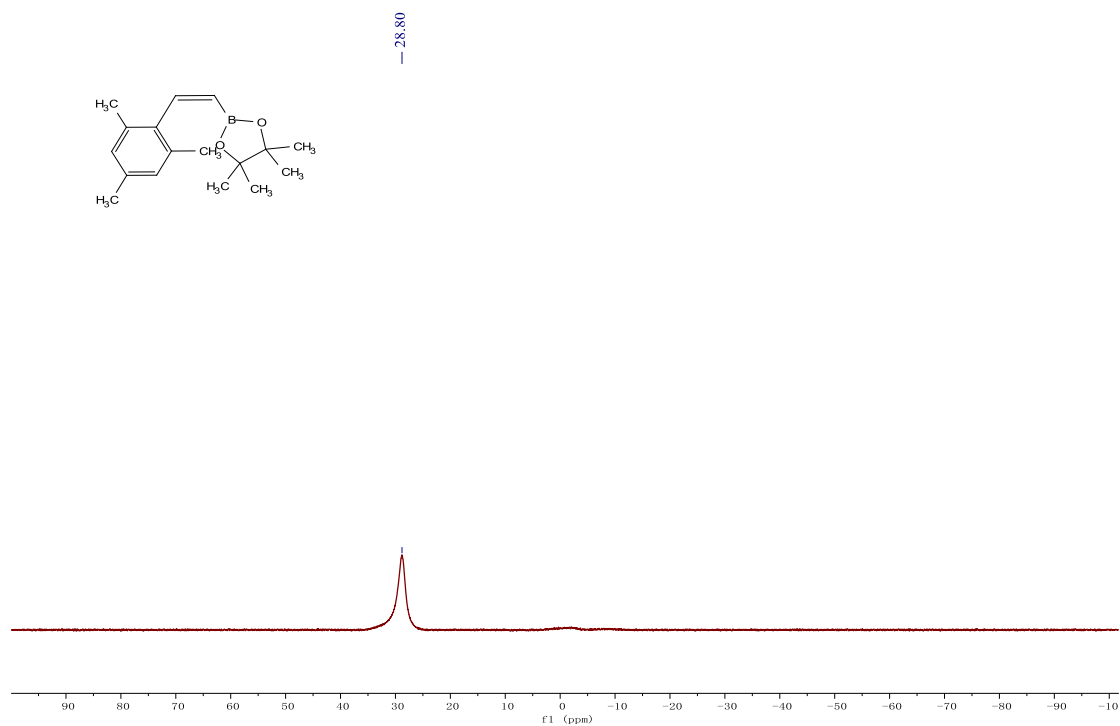



$^1\text{H}$  NMR (400 MHz, Chloroform-*d*) of 26b ([See procedure](#))

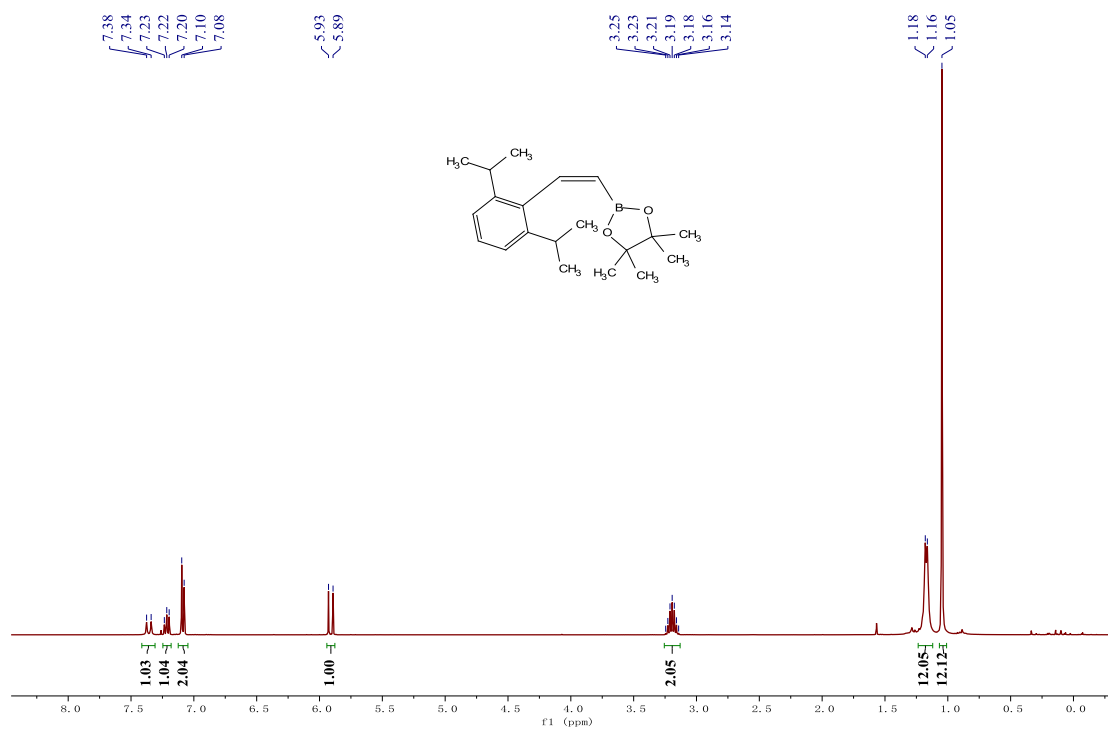

$^{13}\text{C}$  NMR (101 MHz, Chloroform-*d*) of 26b ([See procedure](#))

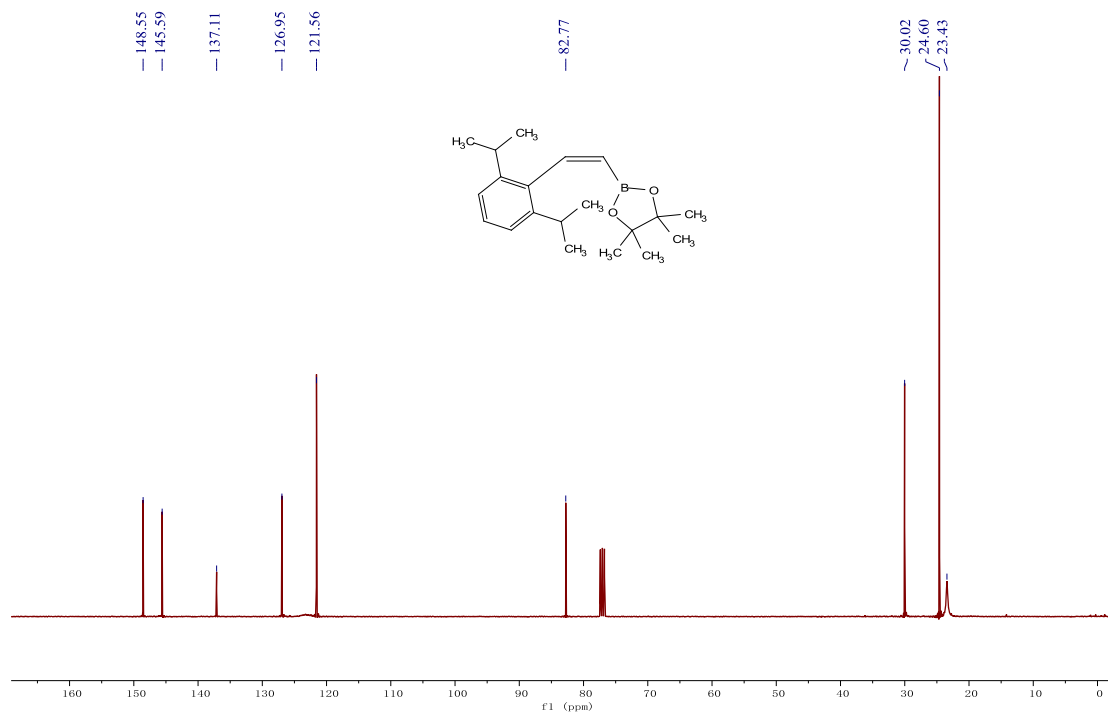

$^{11}\text{B}$  NMR (128 MHz, Chloroform-*d*) of 26b ([See procedure](#))

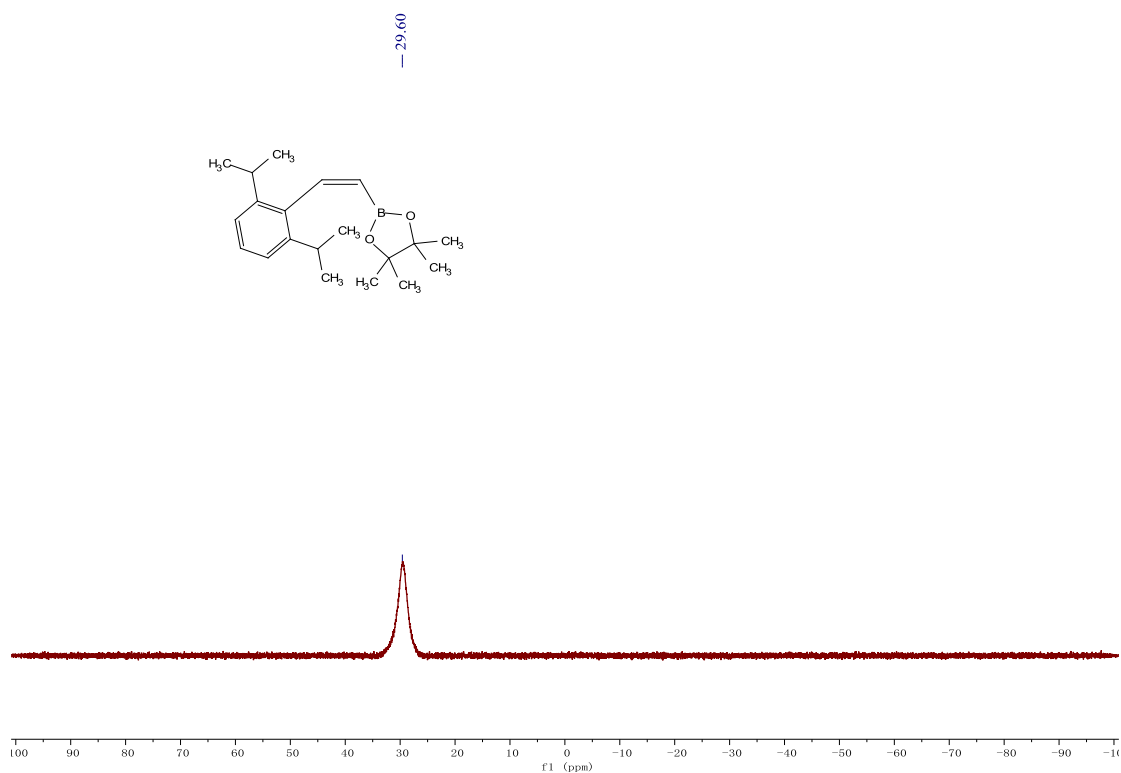

$^1\text{H}$  NMR (400 MHz, Chloroform-*d*) of 27b ([See procedure](#))

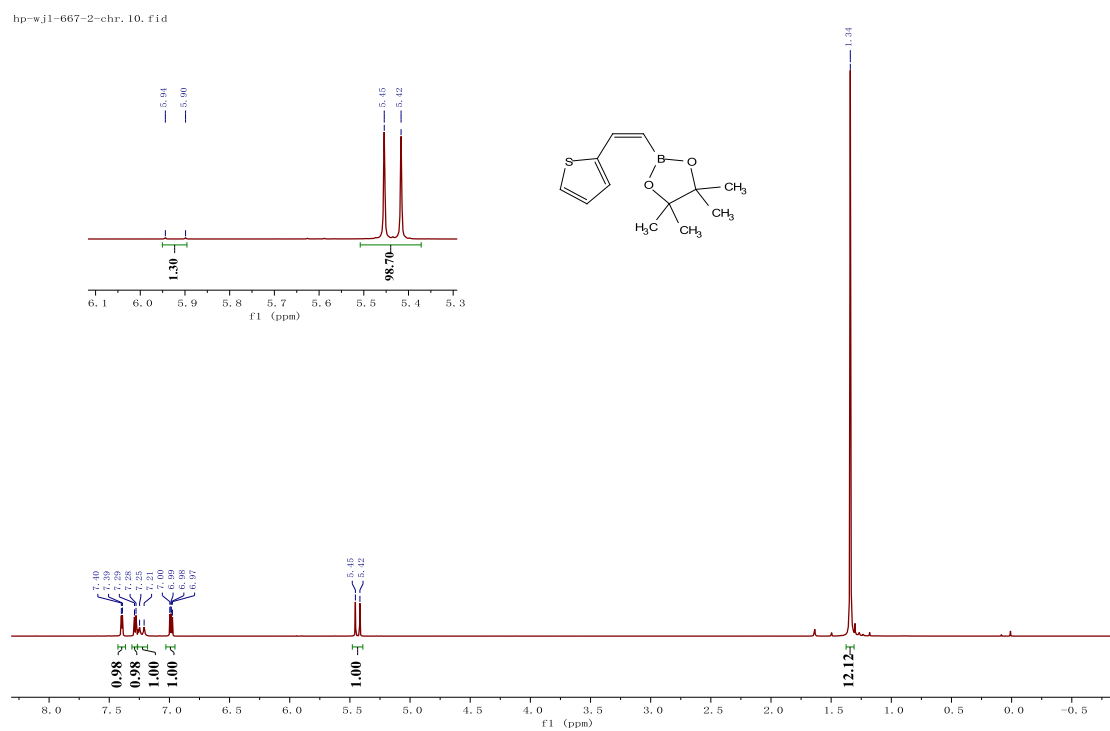

$^1\text{H}$  NMR (400 MHz, Chloroform-*d*) of 28b ([See procedure](#))

hp-wj1-668-1-chr. 10. f1d  
PROTON CDC13 [E:\wenj16] wenj16 32

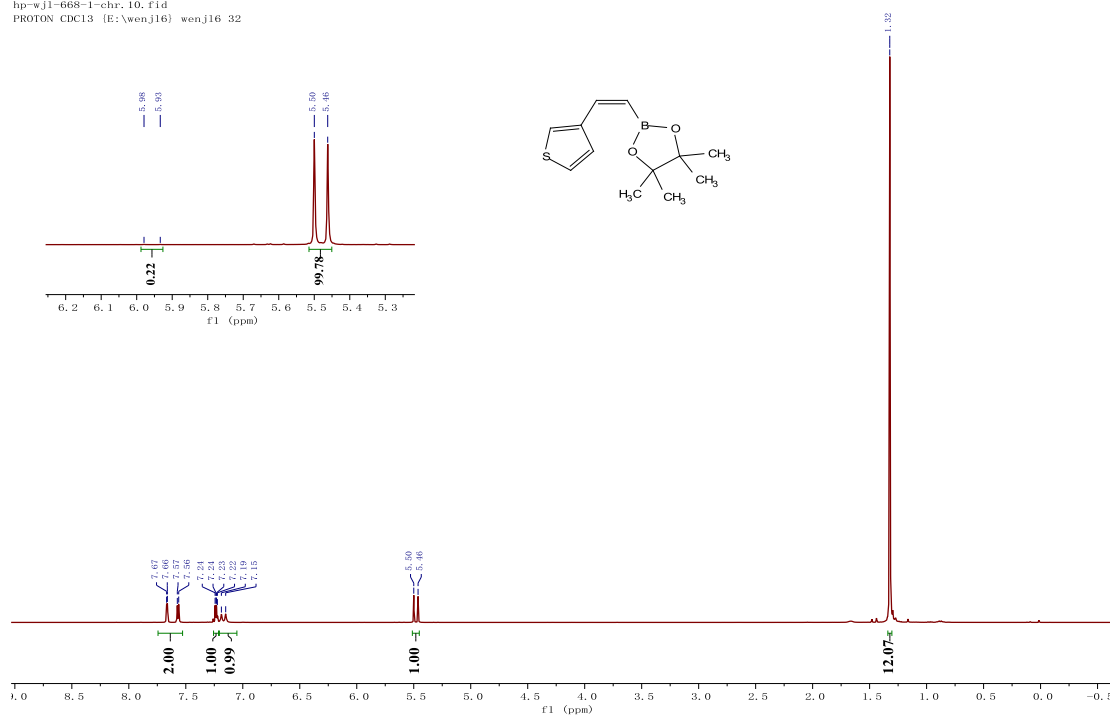

$^{13}\text{C}$  NMR (151 MHz, Chloroform-*d*) of 28b ([See procedure](#))

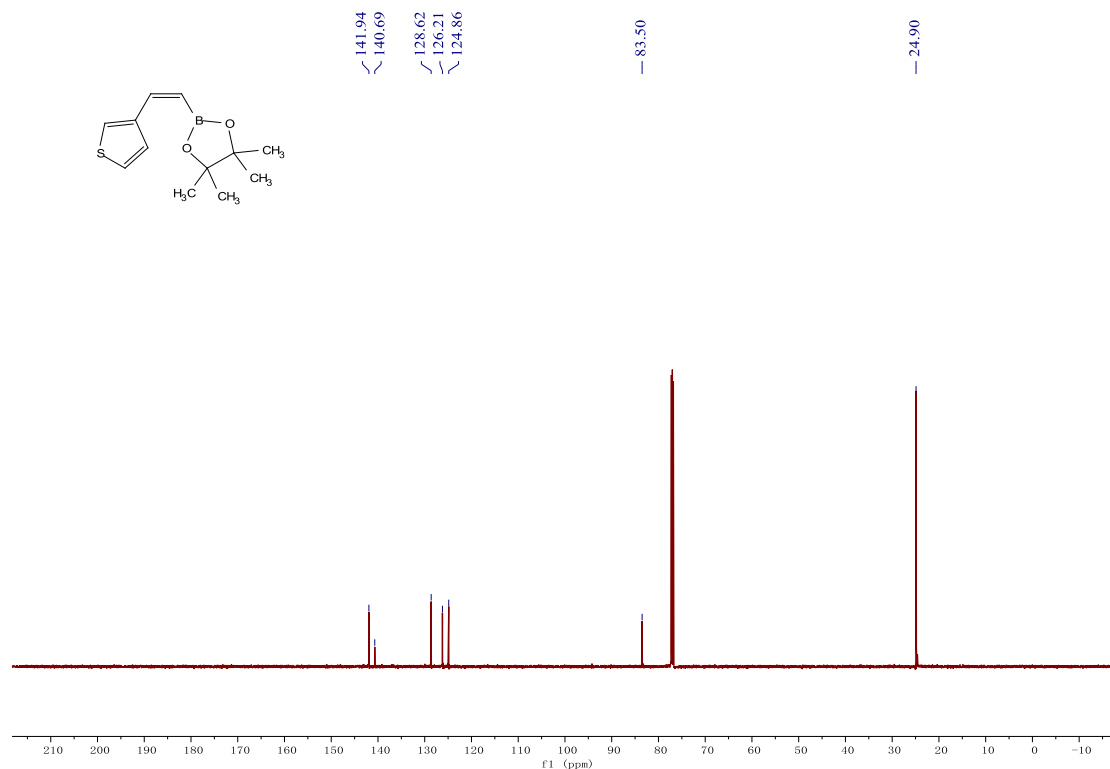

$^{11}\text{B}$  NMR (193 MHz, Chloroform-*d*) of 28b ([See procedure](#))

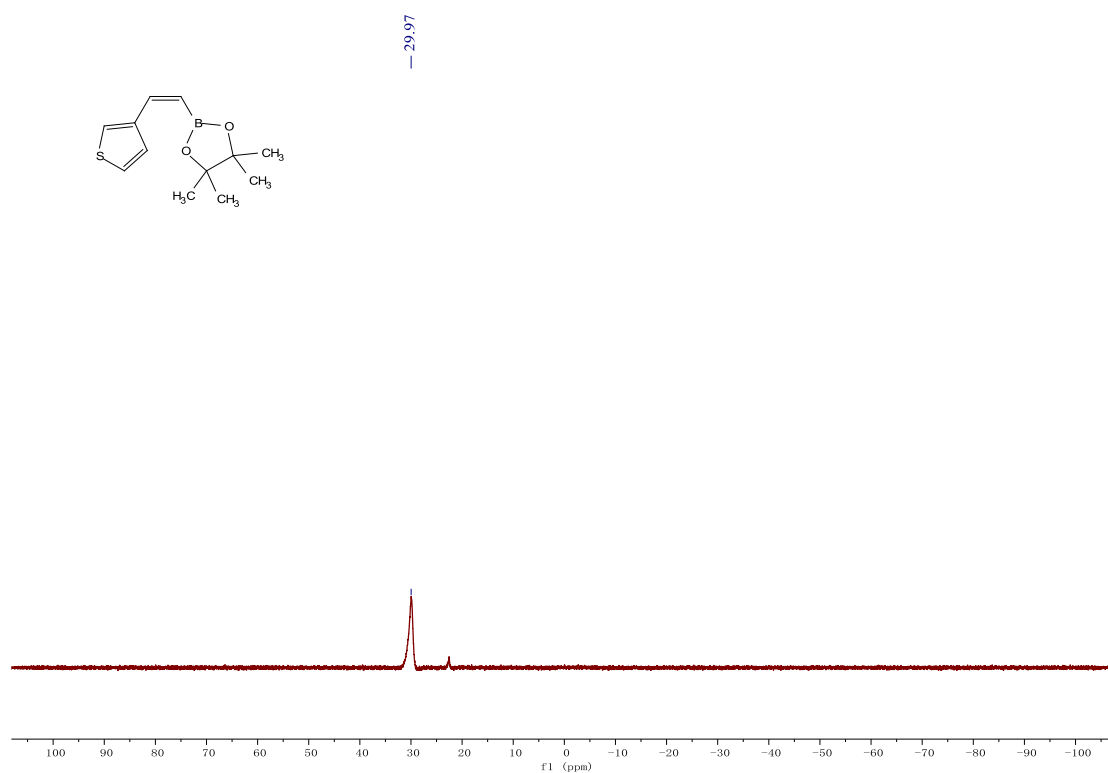

$^1\text{H}$  NMR (600 MHz, Chloroform-*d*) of 29b ([See procedure](#))

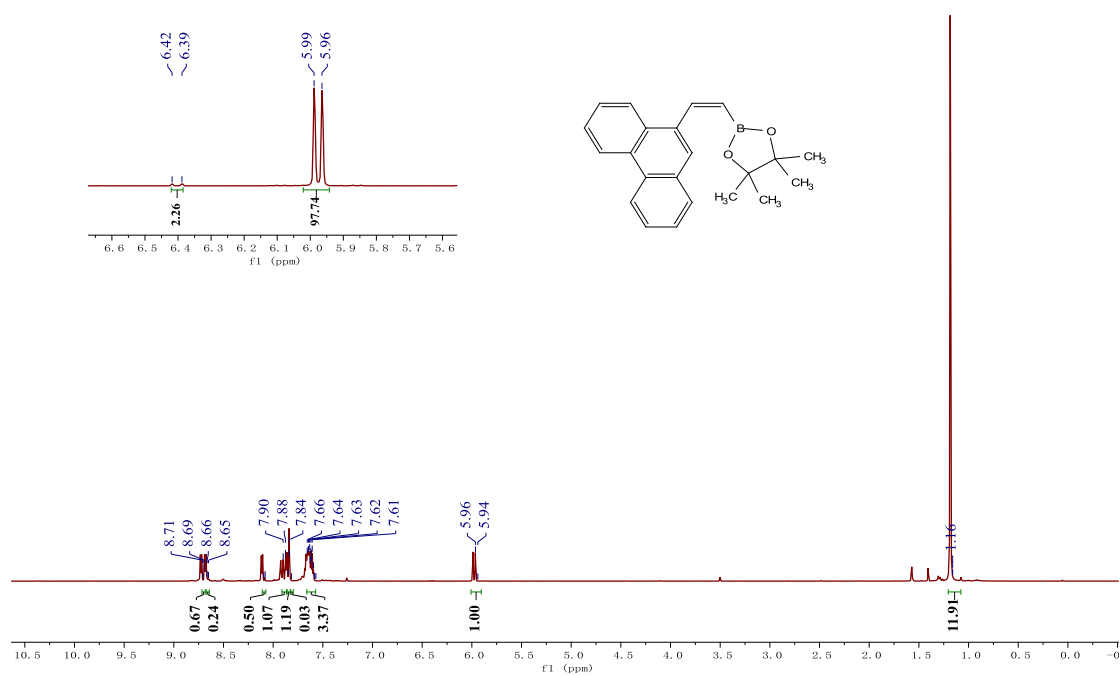

$^{13}\text{C}$  NMR (151 MHz, Chloroform-*d*) of **29b** ([See procedure](#))

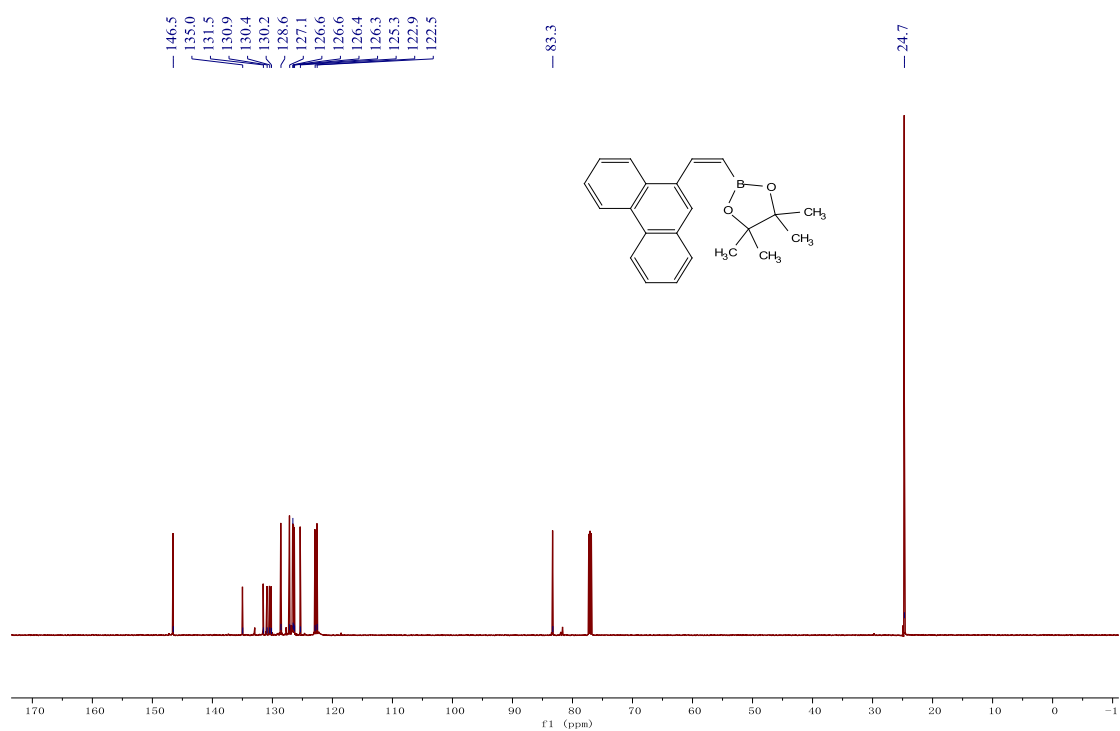

$^{11}\text{B}$  NMR (193 MHz, Chloroform-*d*) of **29b** ([See procedure](#))

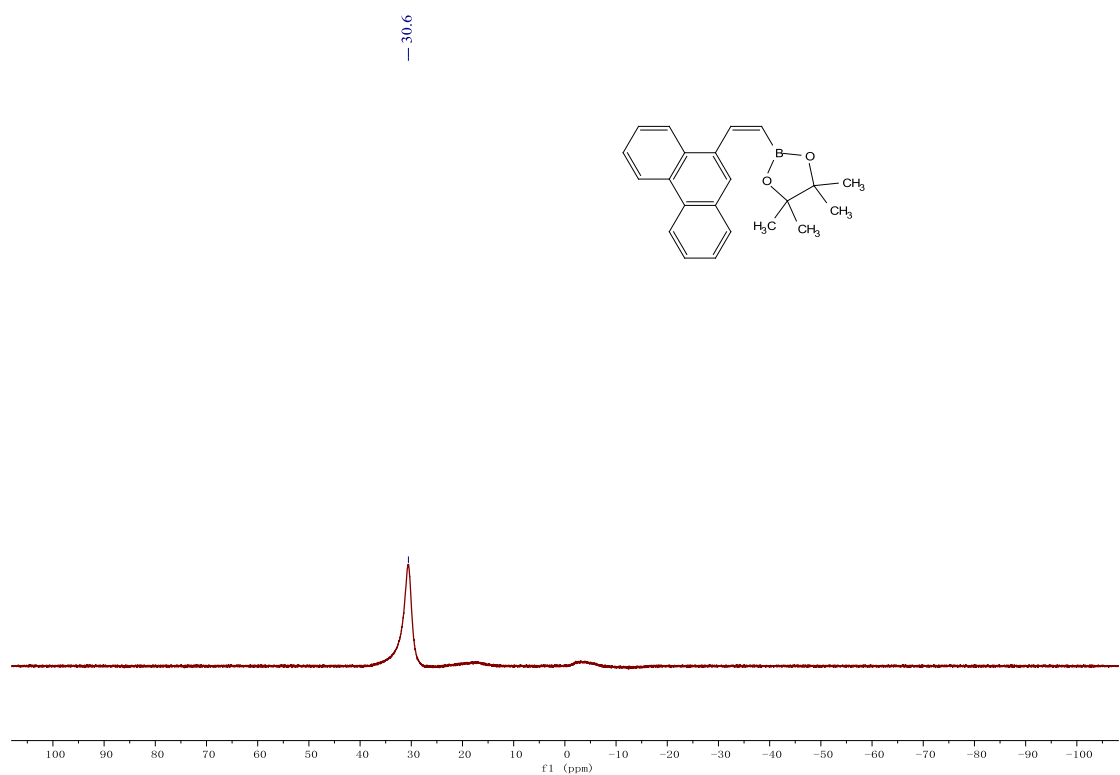

<sup>1</sup>H NMR (400 MHz, Chloroform-d) of 30b (See procedure)

hp-wj1-668-7.10.f1d

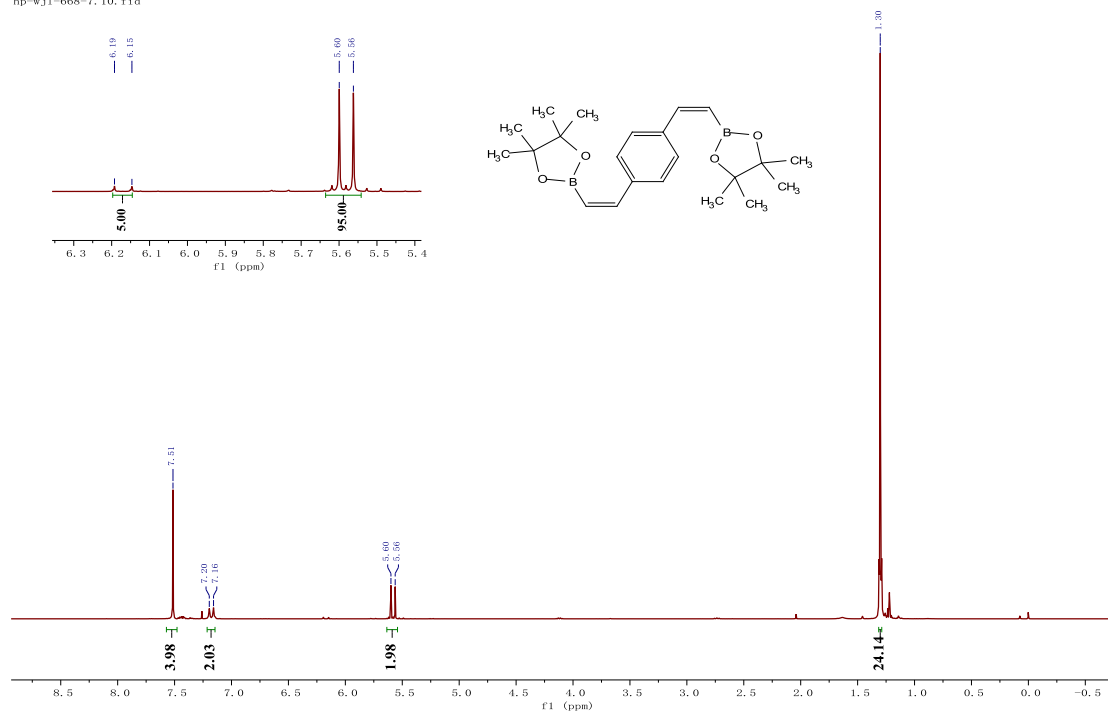

<sup>1</sup>H NMR (400 MHz, Chloroform-d) of 31b (See procedure)

hp-wj1-663-1-chr. 10.f1d

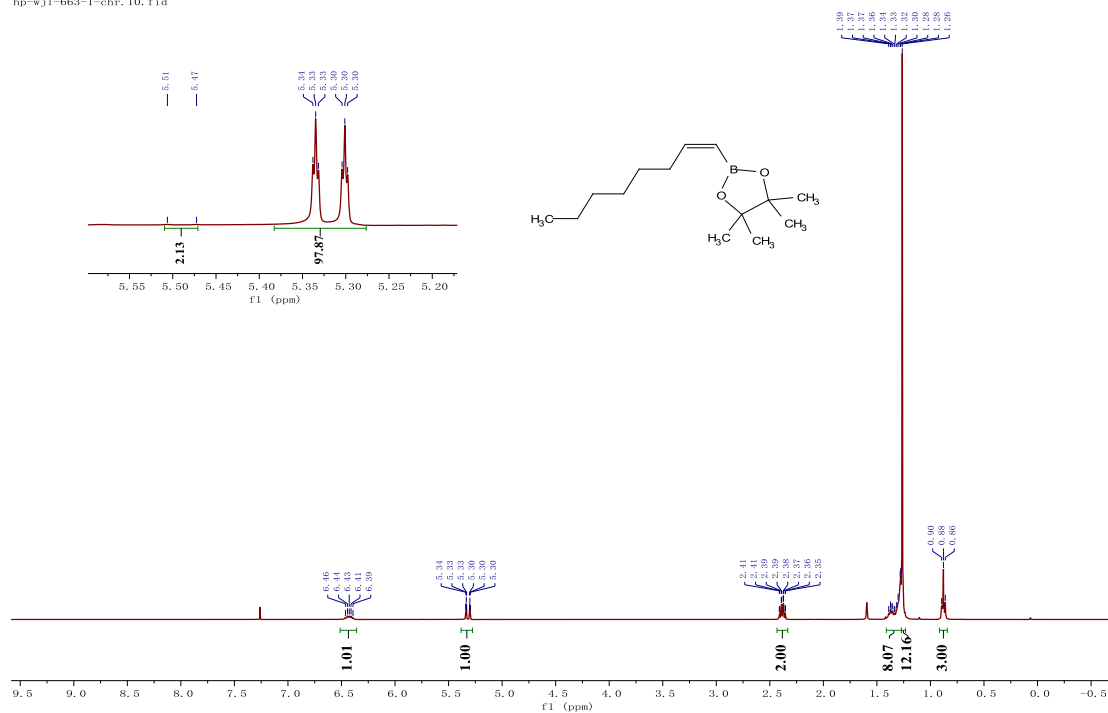

$^{11}\text{B}$  NMR (193 MHz, Chloroform-*d*) of **31b** ([See procedure](#))

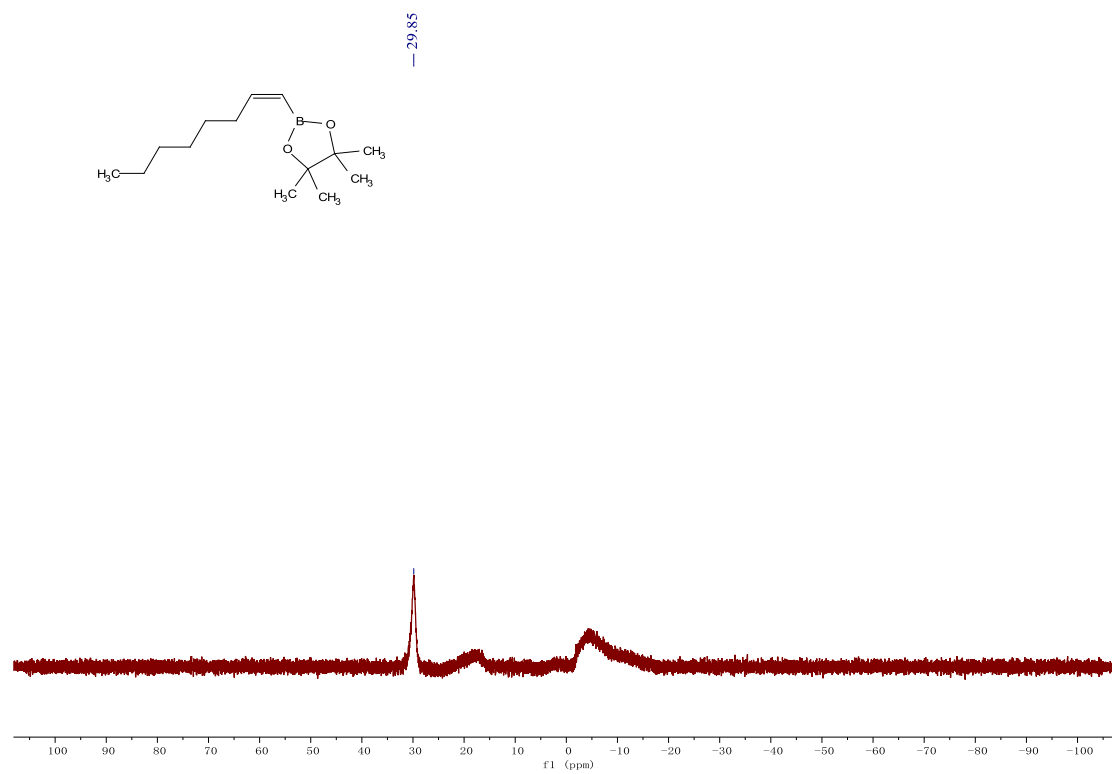

<sup>1</sup>H NMR (400 MHz, Chloroform-d) of 32b (See procedure)

HP-WJL-664-1-CHR, 10, FID

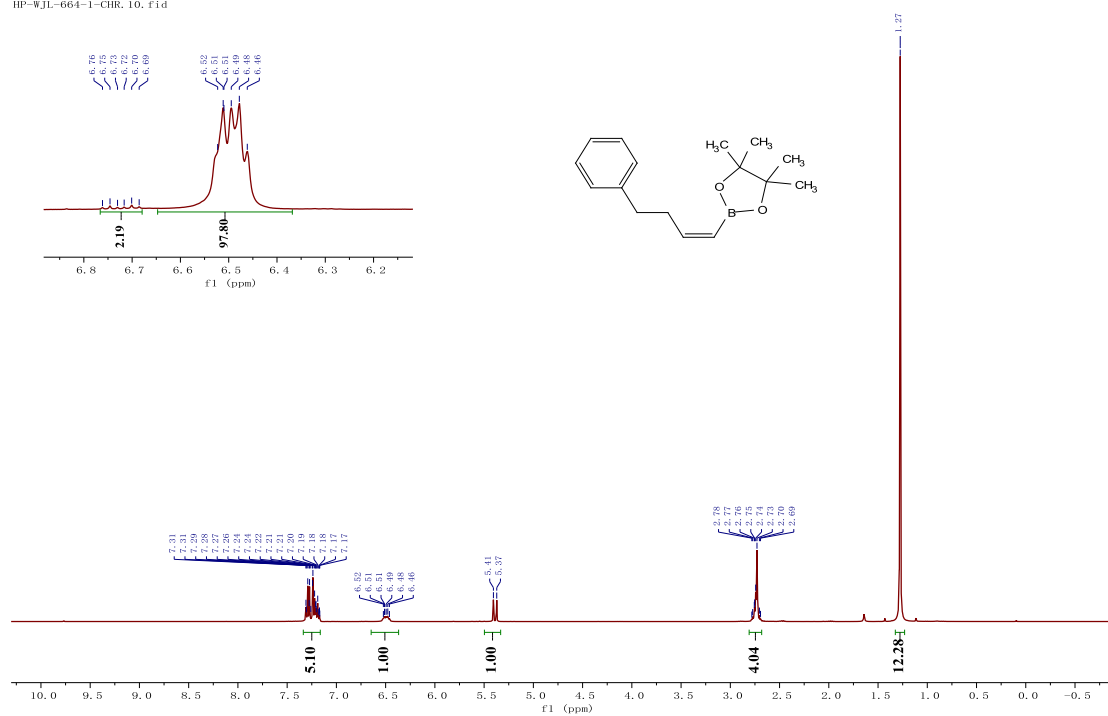

<sup>1</sup>H NMR (400 MHz, Chloroform-d) of 33b (See procedure)

hp-wjl-665-5-chr, 10, FID

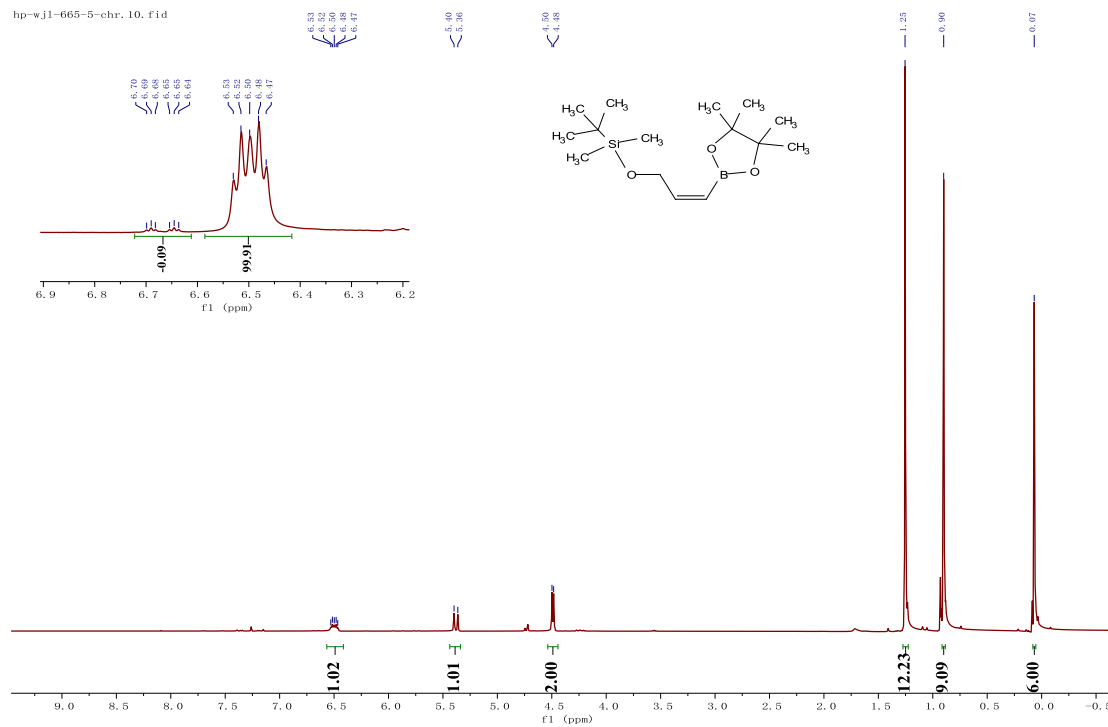



$^1\text{H}$  NMR (400 MHz, Chloroform-*d*) of **34b** ([See procedure](#))

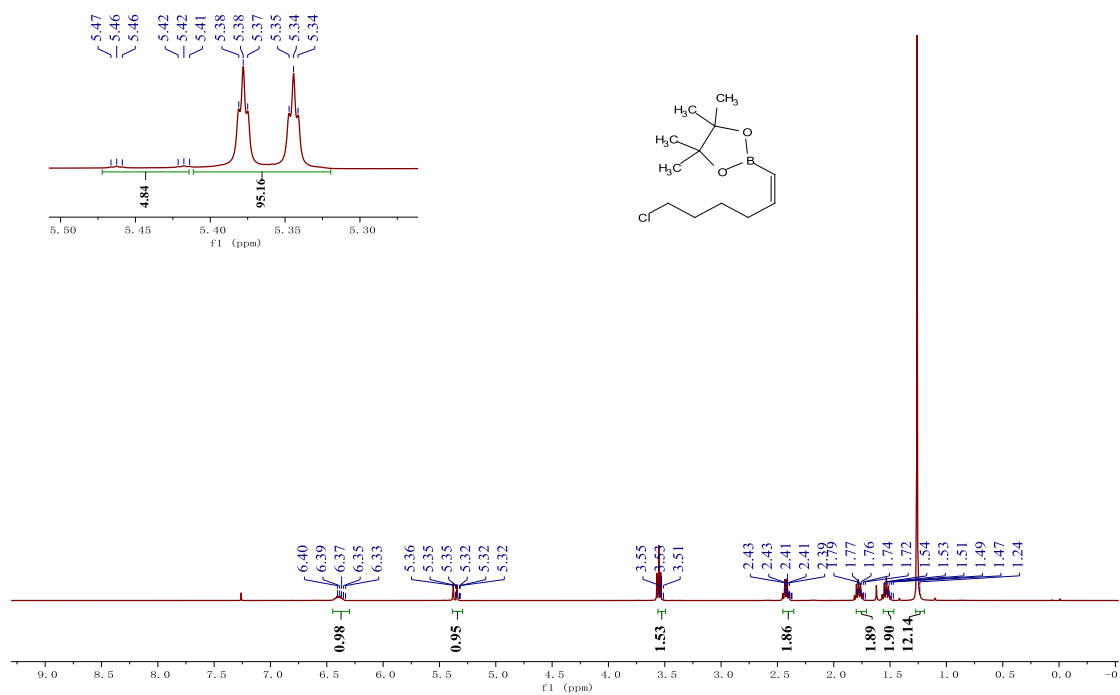

$^{13}\text{C}$  NMR (101 MHz, Chloroform-*d*) of **34b** ([See procedure](#))

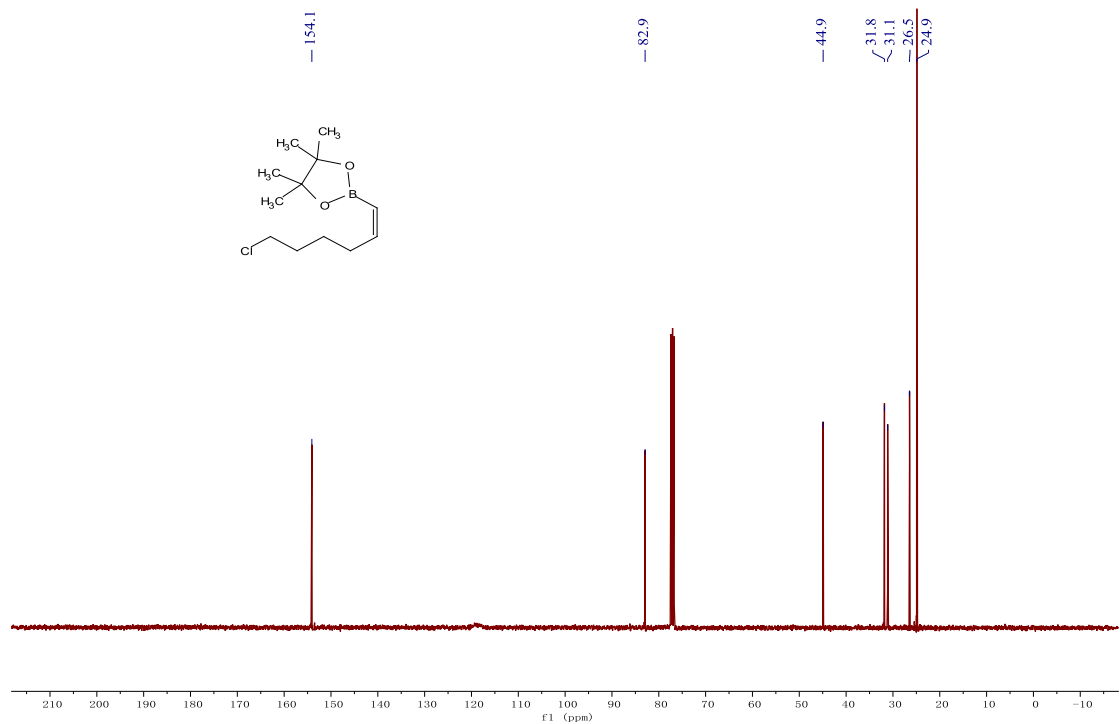

$^{11}\text{B}$  NMR (128 MHz, Chloroform-*d*) of **34b** ([See procedure](#))

— 29.76

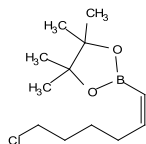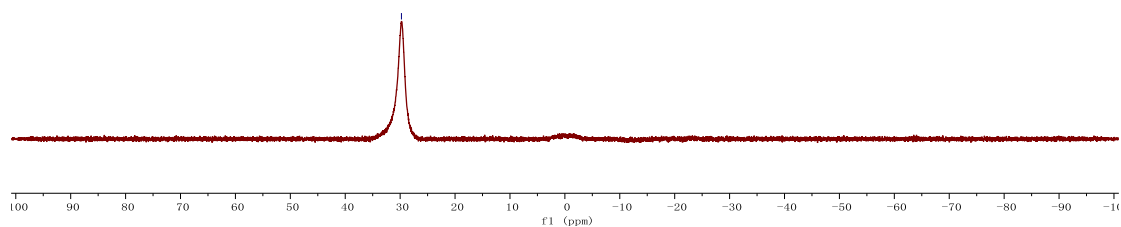

$^1\text{H}$  NMR (400 MHz, Chloroform-*d*) of **35b** ([See procedure](#))

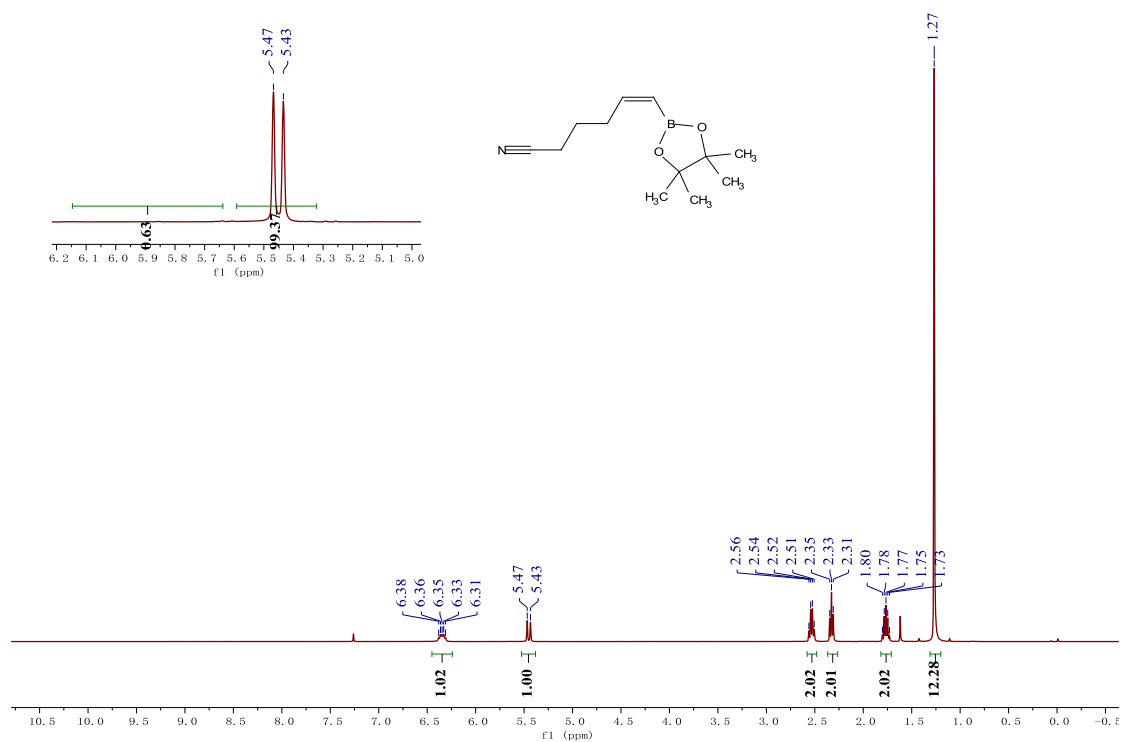

$^{13}\text{C}$  NMR (101 MHz, Chloroform-*d*) of 35b ([See procedure](#))

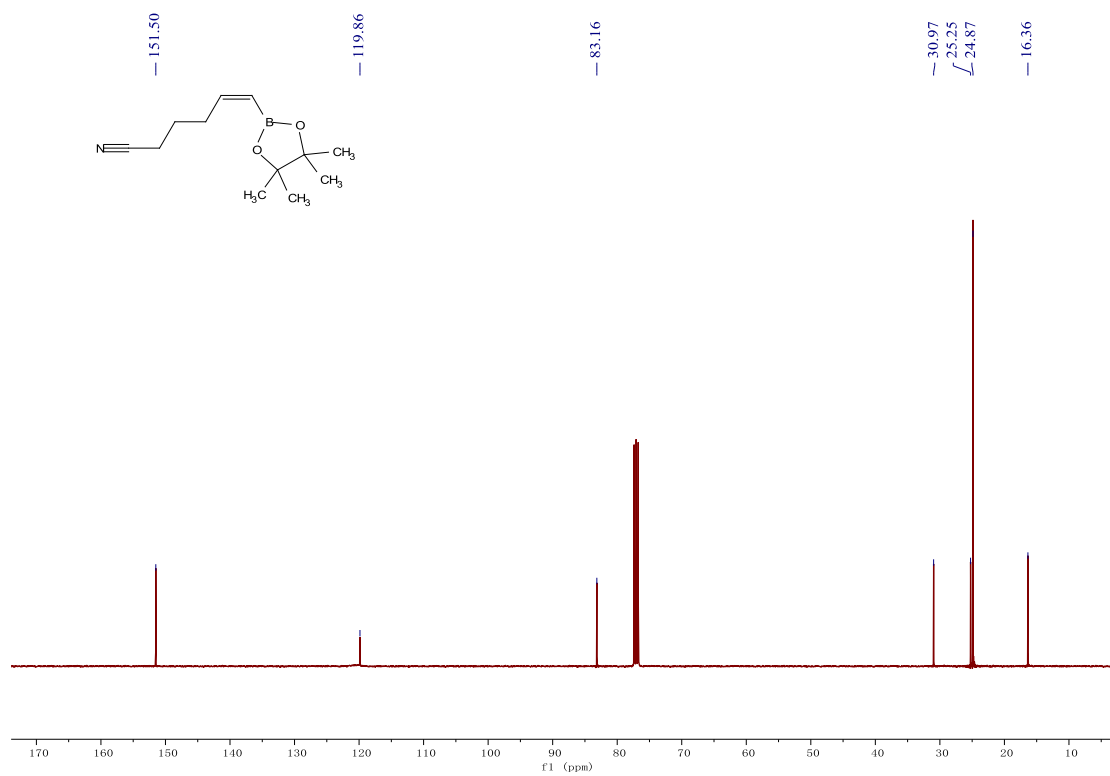

$^{11}\text{B}$  NMR (193 MHz, Chloroform-*d*) of 35b ([See procedure](#))

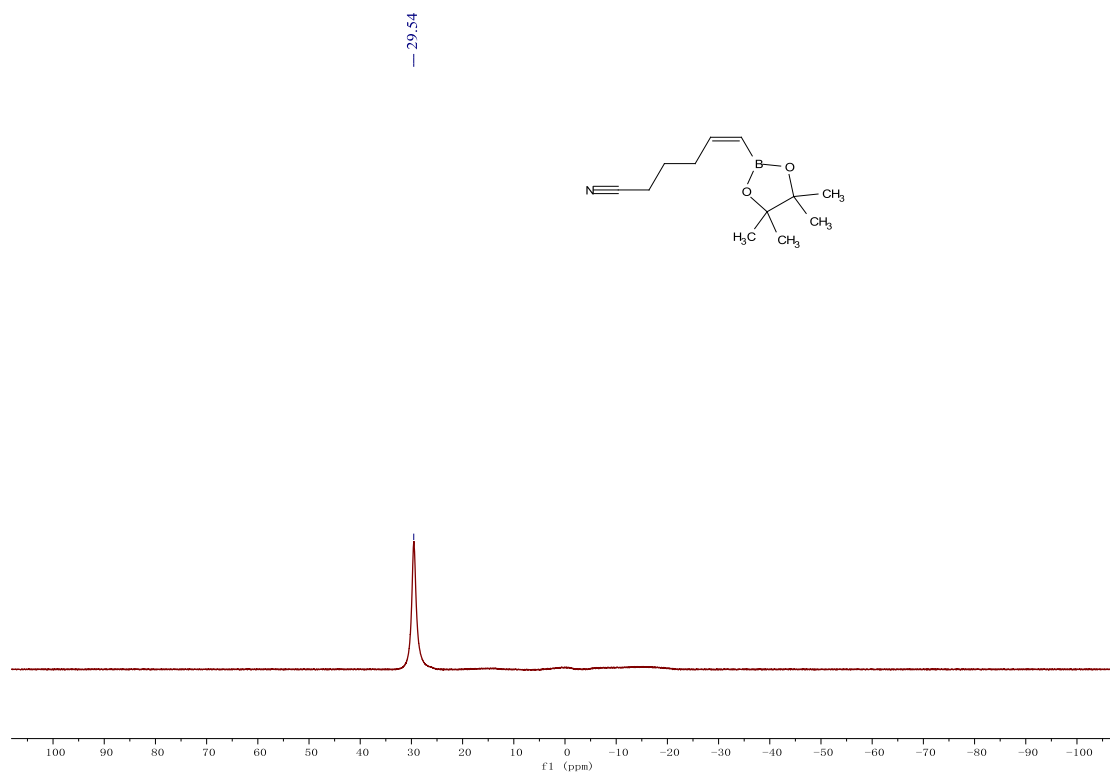

<sup>1</sup>H NMR (600 MHz, Chloroform-*d*) of 36b ([See procedure](#))

hp-wj1-952-1-chr-b, 13, f1.d

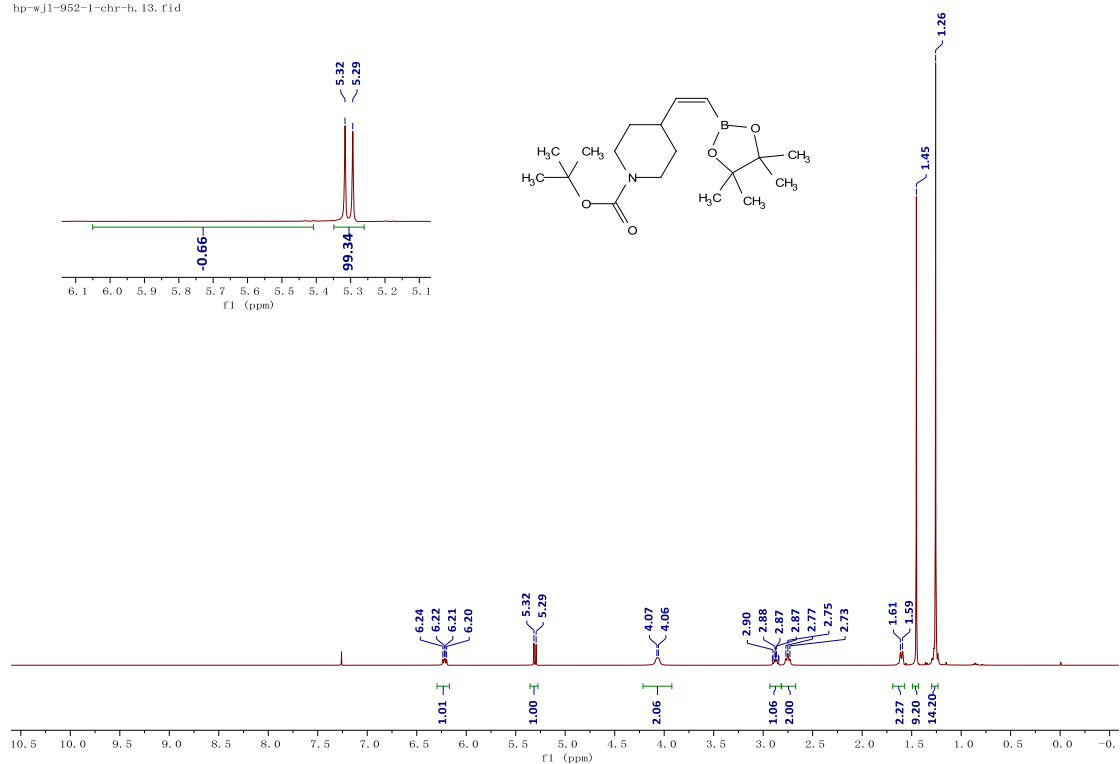

<sup>13</sup>C NMR (151 MHz, Chloroform-*d*) of 36b ([See procedure](#))

hp-wj1-952-1-chr-c, 14, f1.d

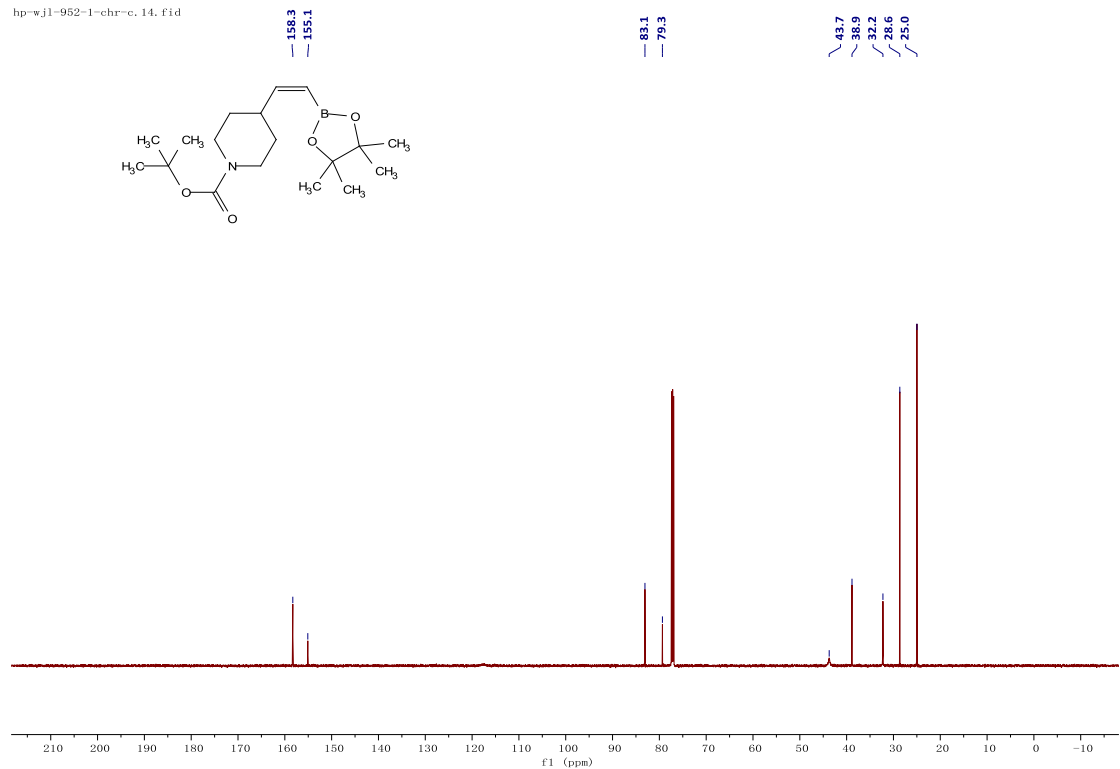

$^{11}\text{B}$  NMR (193 MHz, Chloroform-*d*) of 36b ([See procedure](#))

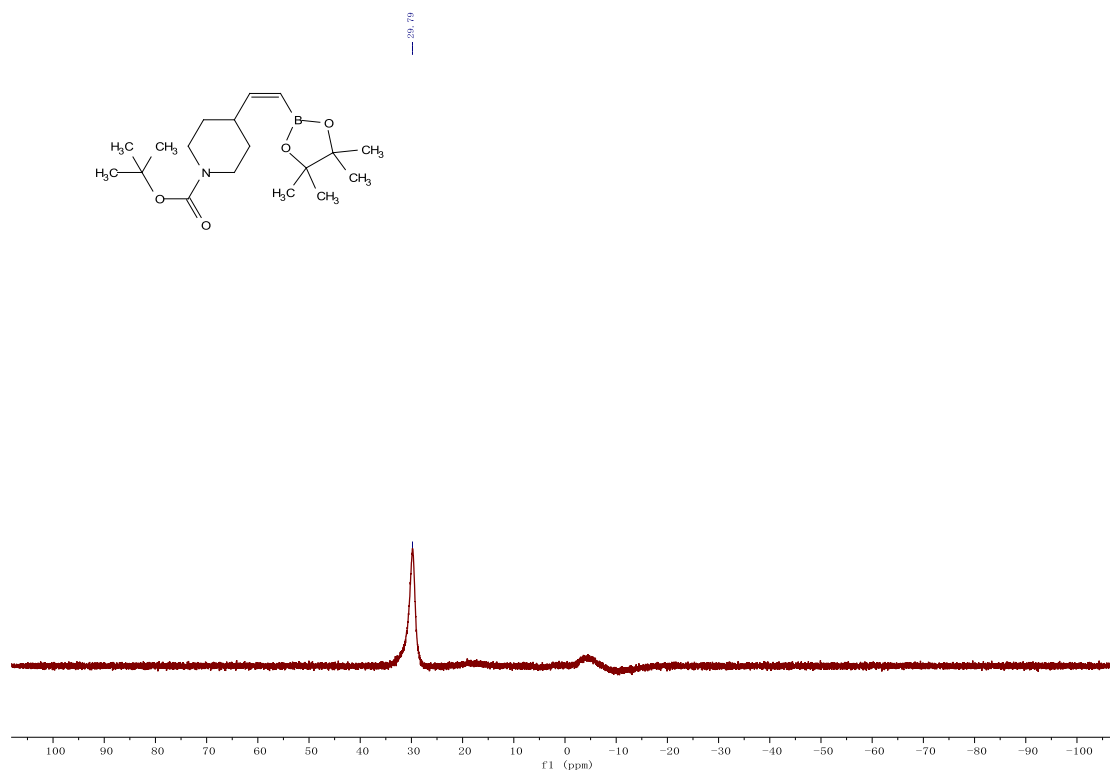

$^1\text{H}$  NMR (400 MHz, Chloroform-*d*) of 37b ([See procedure](#))

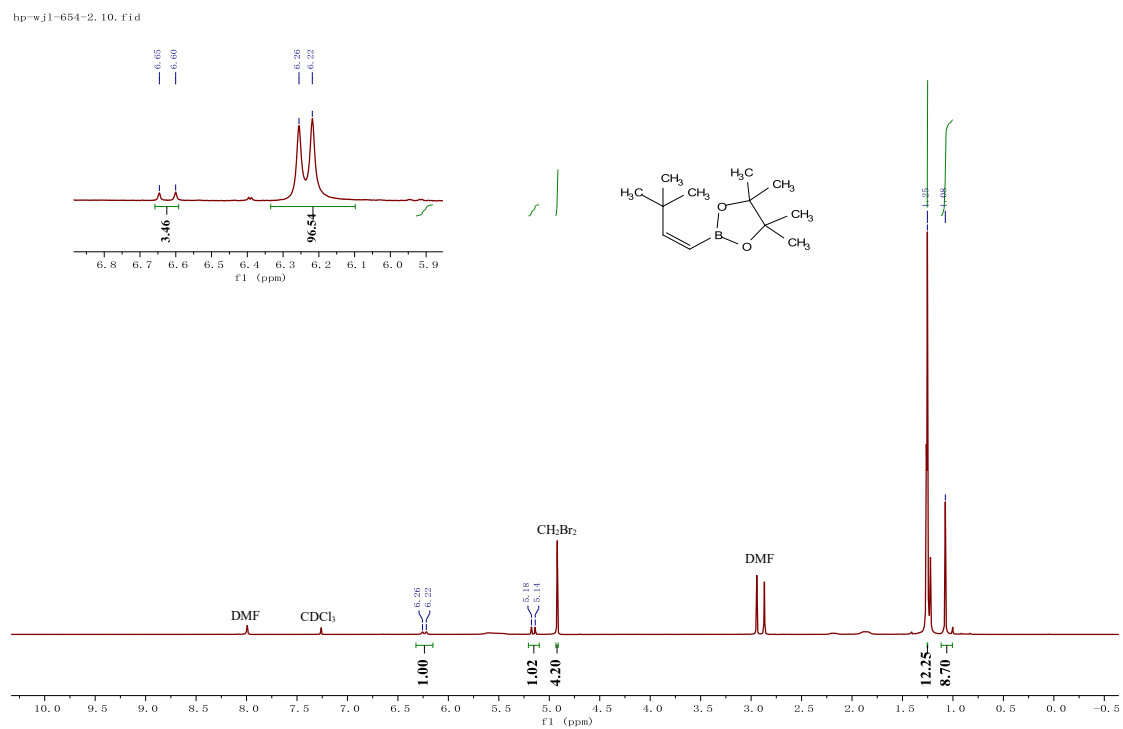

$^1\text{H}$  NMR (400 MHz, Chloroform-*d*) of 38b (*See procedure*)

hp-wj1-660-1-chr. 10. f1d

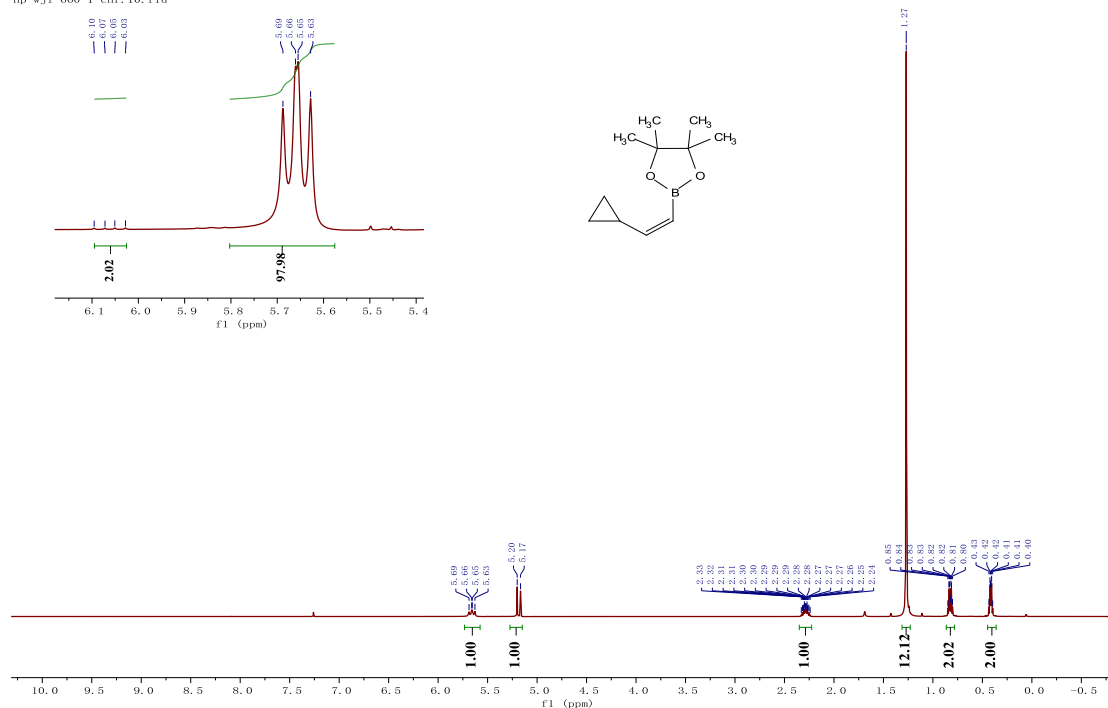

$^1\text{H}$  NMR (400 MHz, Chloroform-*d*) of 39b (*See procedure*)

hp-wj1-659-1. 10. f1d

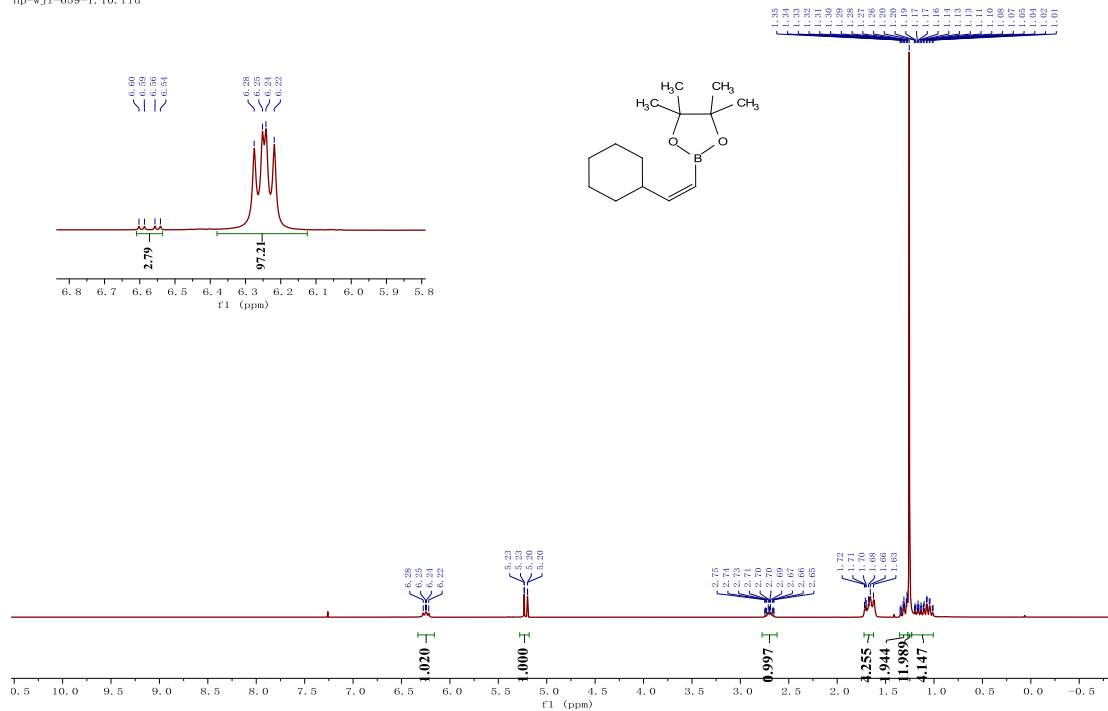

$^1\text{H}$  NMR (400 MHz, Chloroform-*d*) of **40b** (*See procedure*)

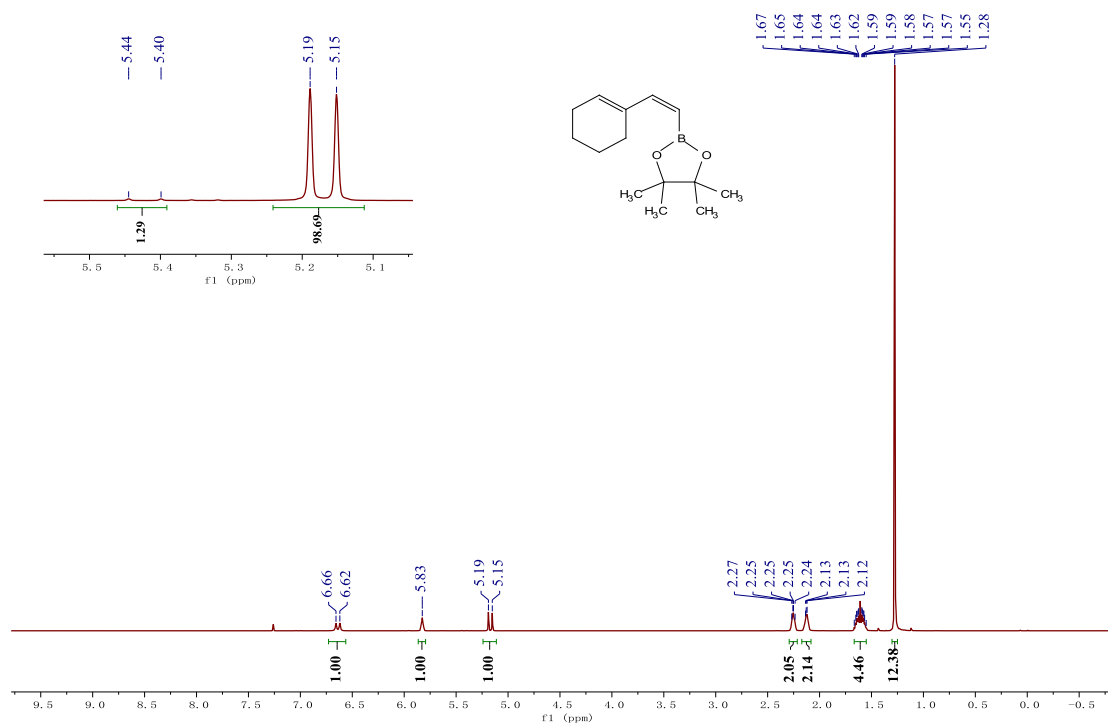

$^{13}\text{C}$  NMR (101 MHz, Chloroform-*d*) of **40b** (*See procedure*)

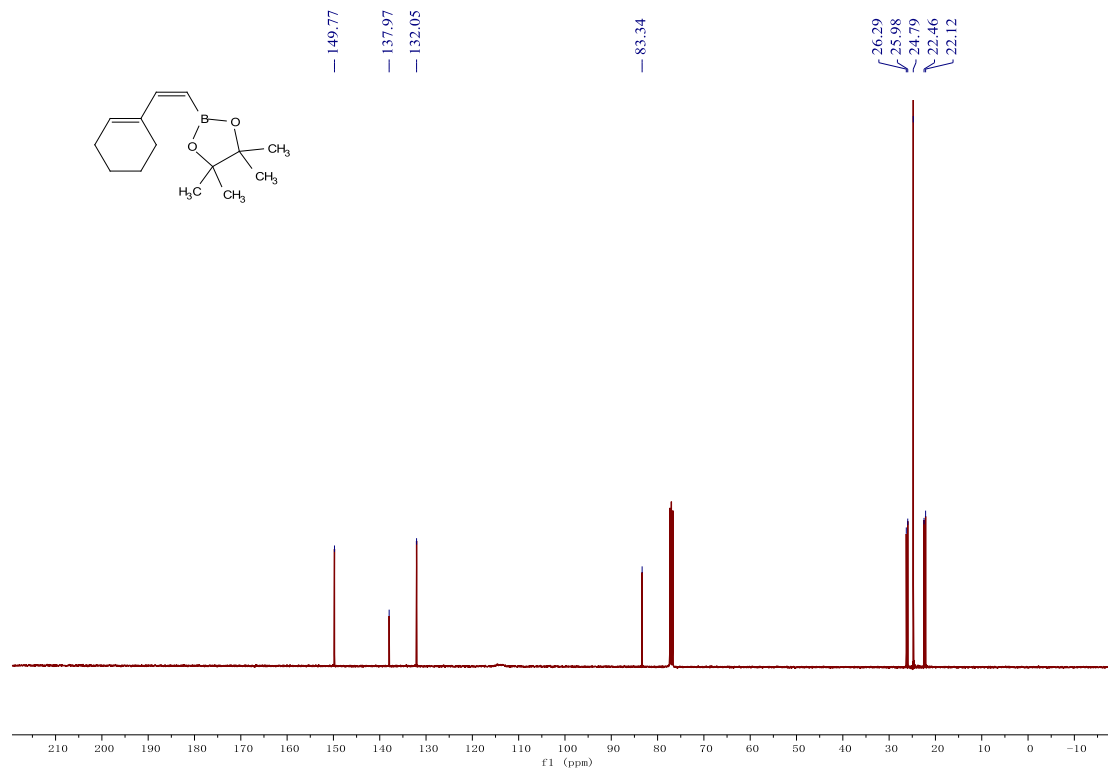

$^{11}\text{B}$  NMR (128 MHz, Chloroform-*d*) of **40b** ([See procedure](#))

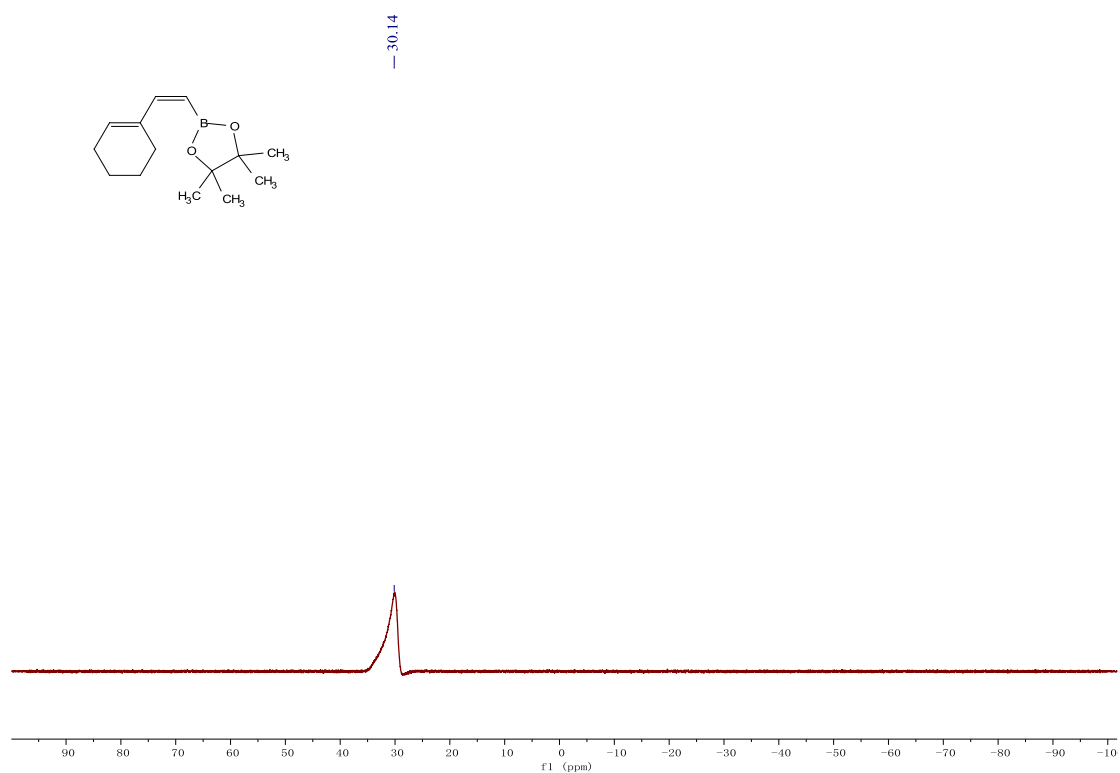

$^1\text{H}$  NMR (600 MHz, Chloroform-*d*) of **41b** ([See procedure](#))

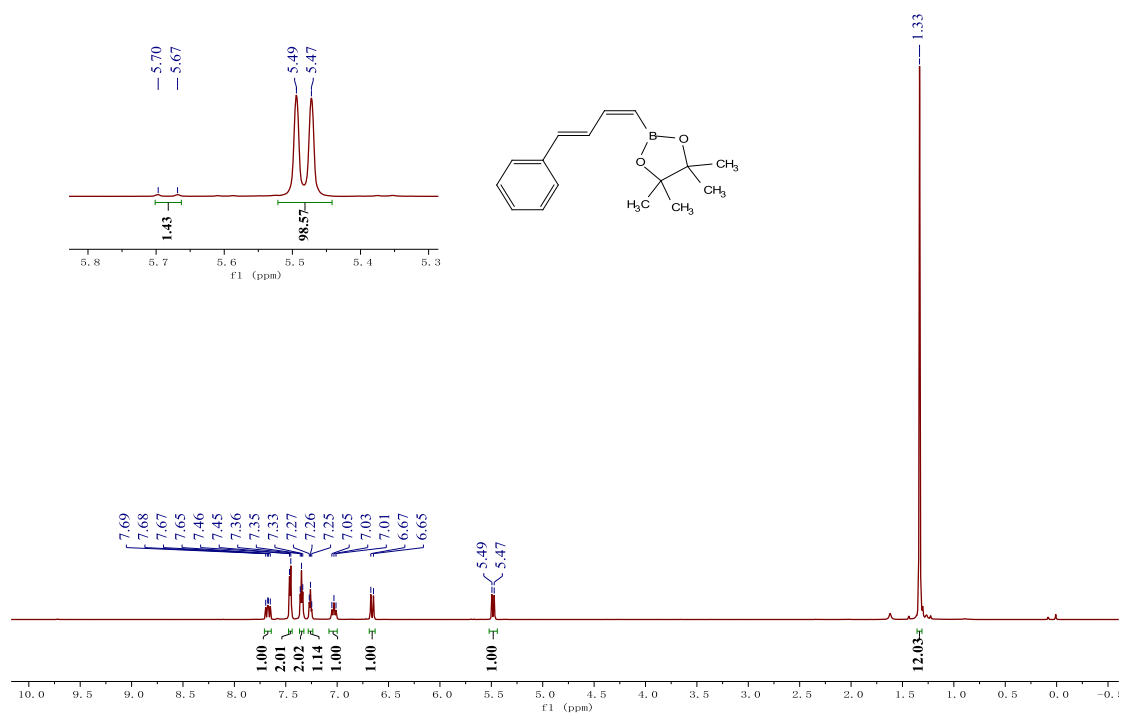



$^{13}\text{C}$  NMR (151 MHz, Chloroform-*d*) of 41b ([See procedure](#))

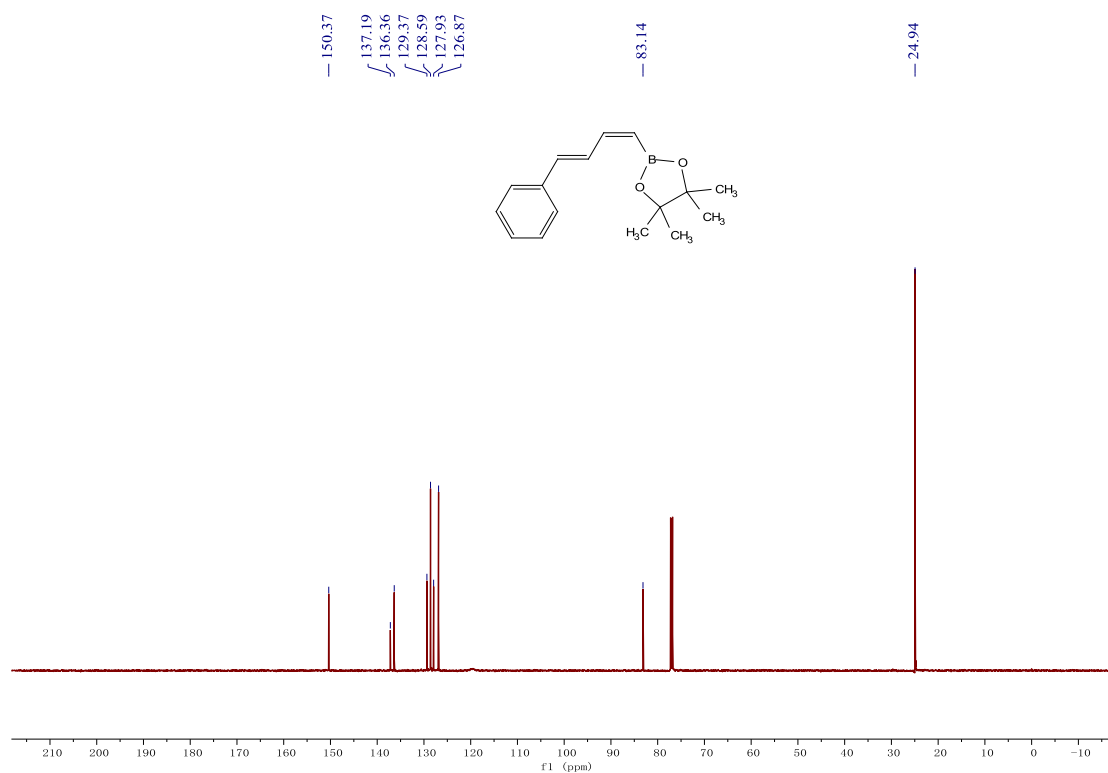

$^{11}\text{B}$  NMR (193 MHz, Chloroform-*d*) of 41b ([See procedure](#))

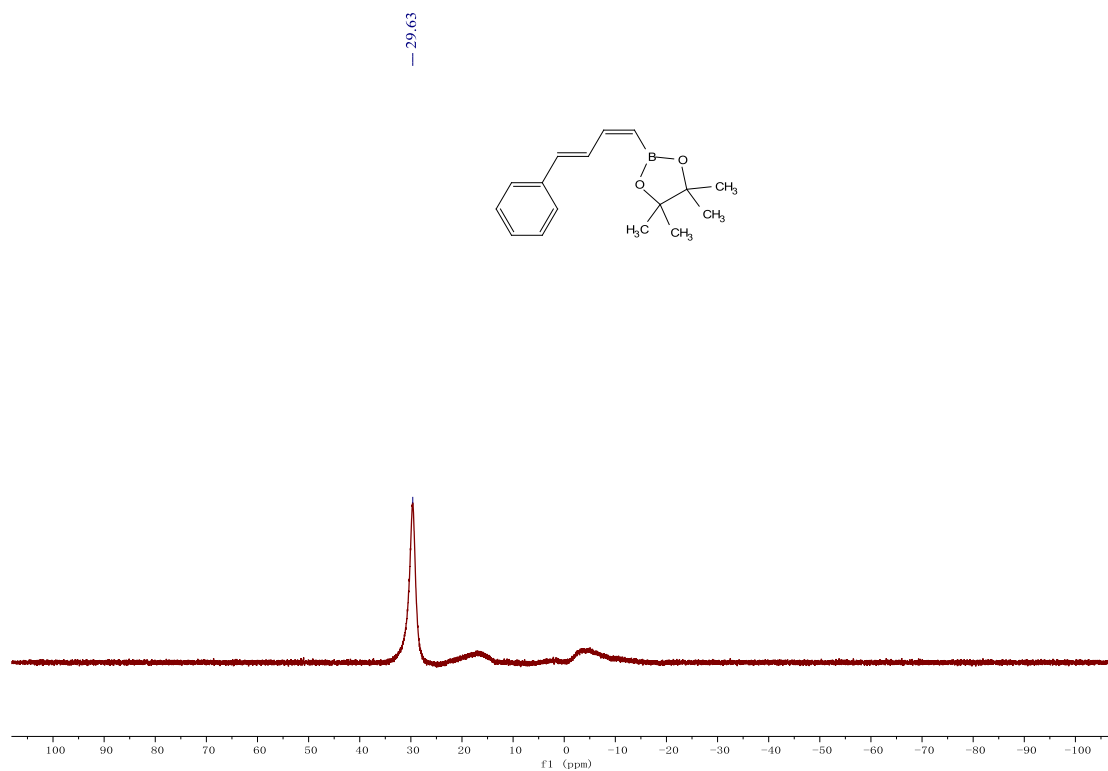

$^1\text{H}$  NMR (600 MHz, Chloroform-*d*) of **42b** ([See procedure](#))

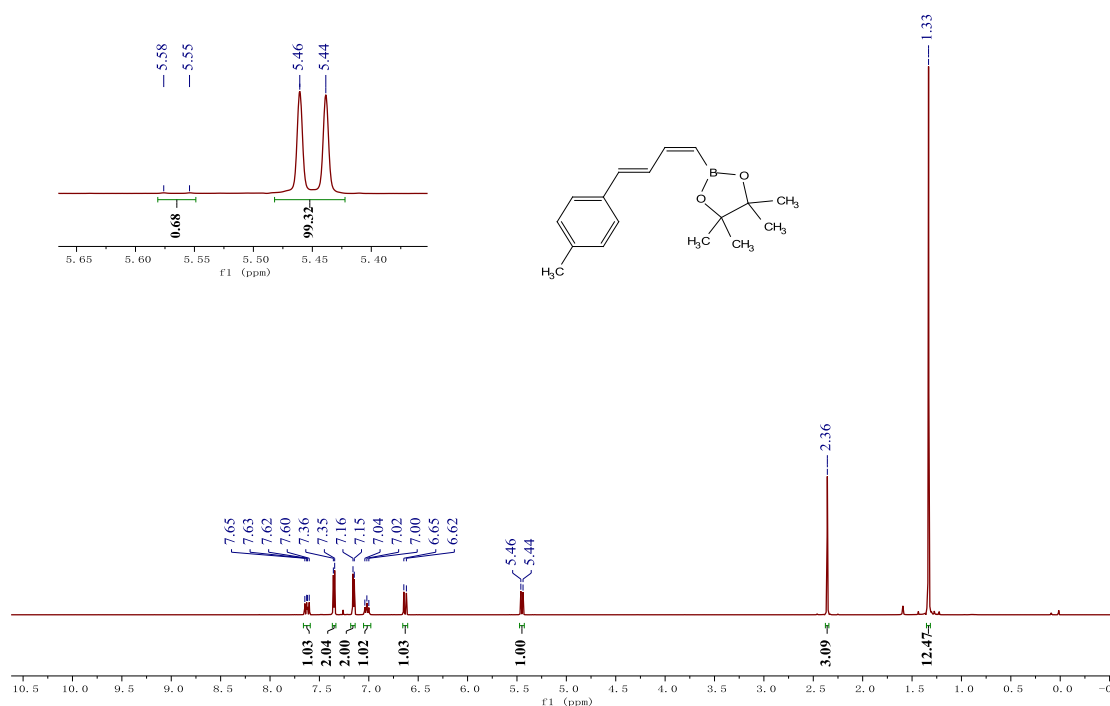

$^{13}\text{C}$  NMR (151 MHz, Chloroform-*d*) of **42b** ([See procedure](#))

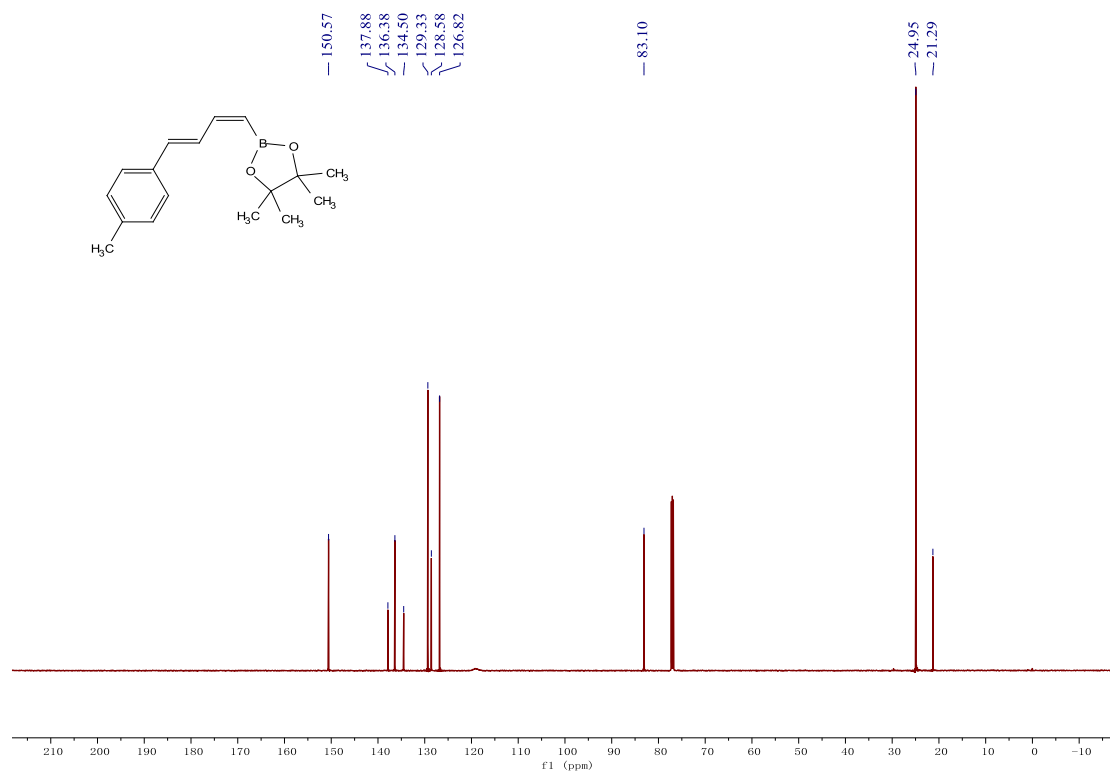

$^{11}\text{B}$  NMR (193 MHz, Chloroform-*d*) of 42b ([See procedure](#))

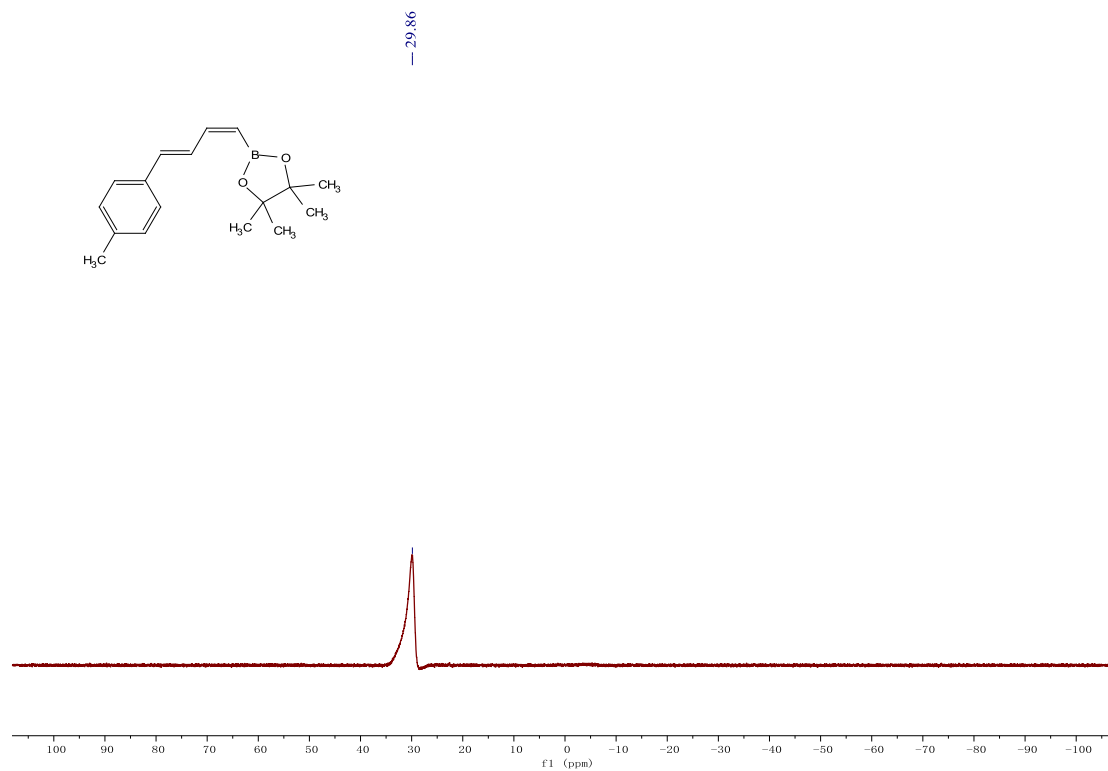

$^1\text{H}$  NMR (400 MHz, Chloroform-*d*) of E-1b ([See procedure](#))

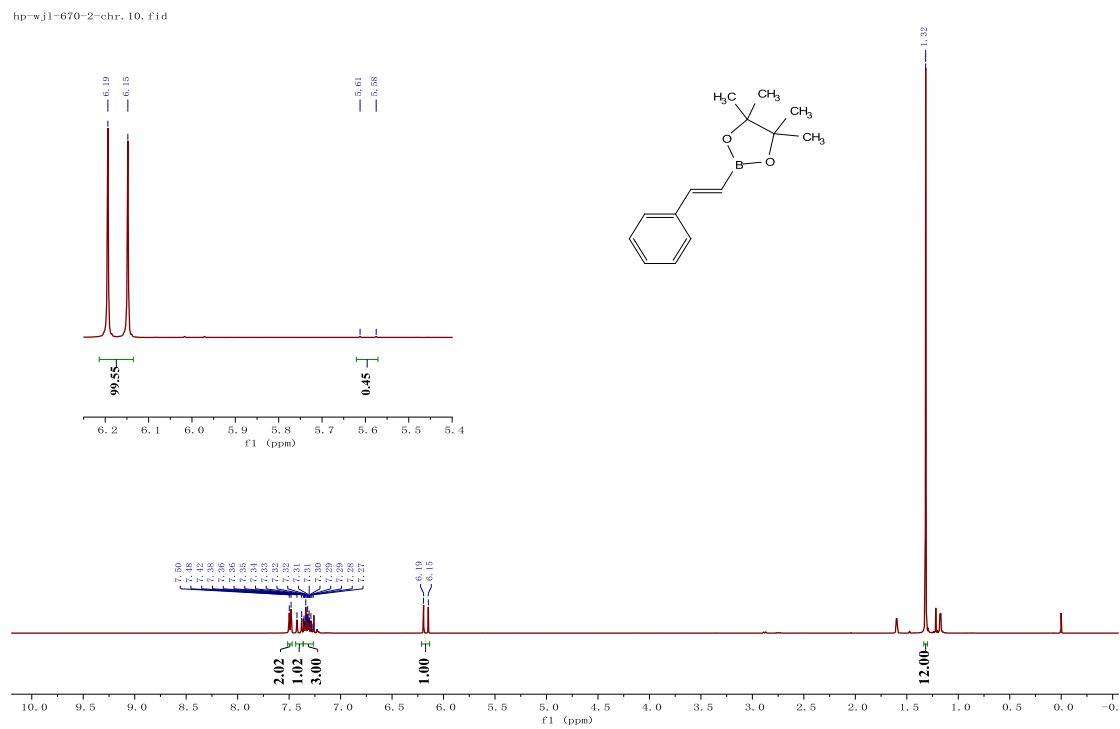

<sup>1</sup>H NMR (400 MHz, Chloroform-*d*) of E-2b (*See procedure*)

hp-wj1-646-CHR-5, 10, f1.d

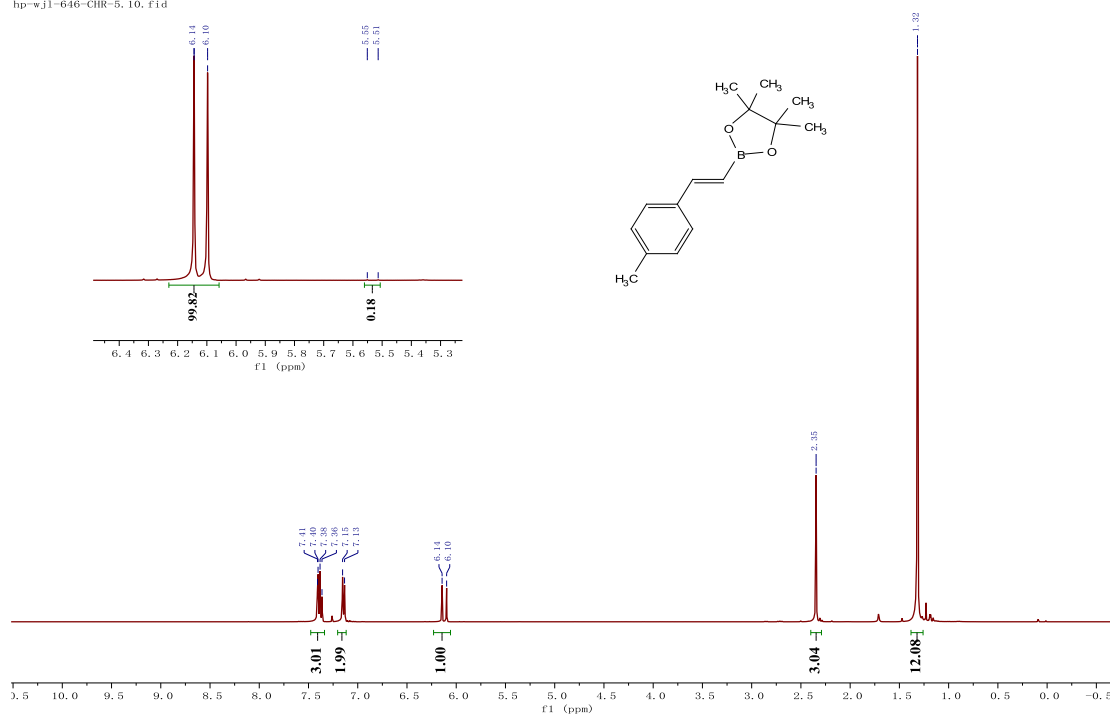

<sup>1</sup>H NMR (400 MHz, Chloroform-*d*) of E-3b (*See procedure*)

hp-wj1-645-CHR-5, 10, f1.d

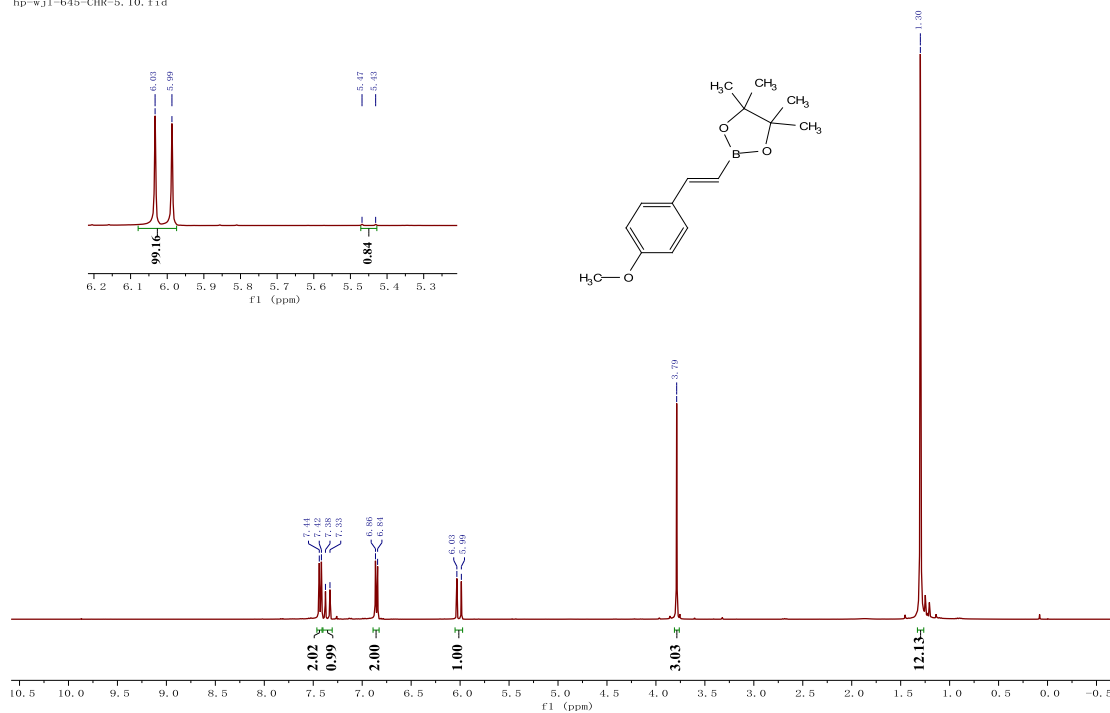

<sup>1</sup>H NMR (400 MHz, Chloroform-d) of E-13b (See procedure)

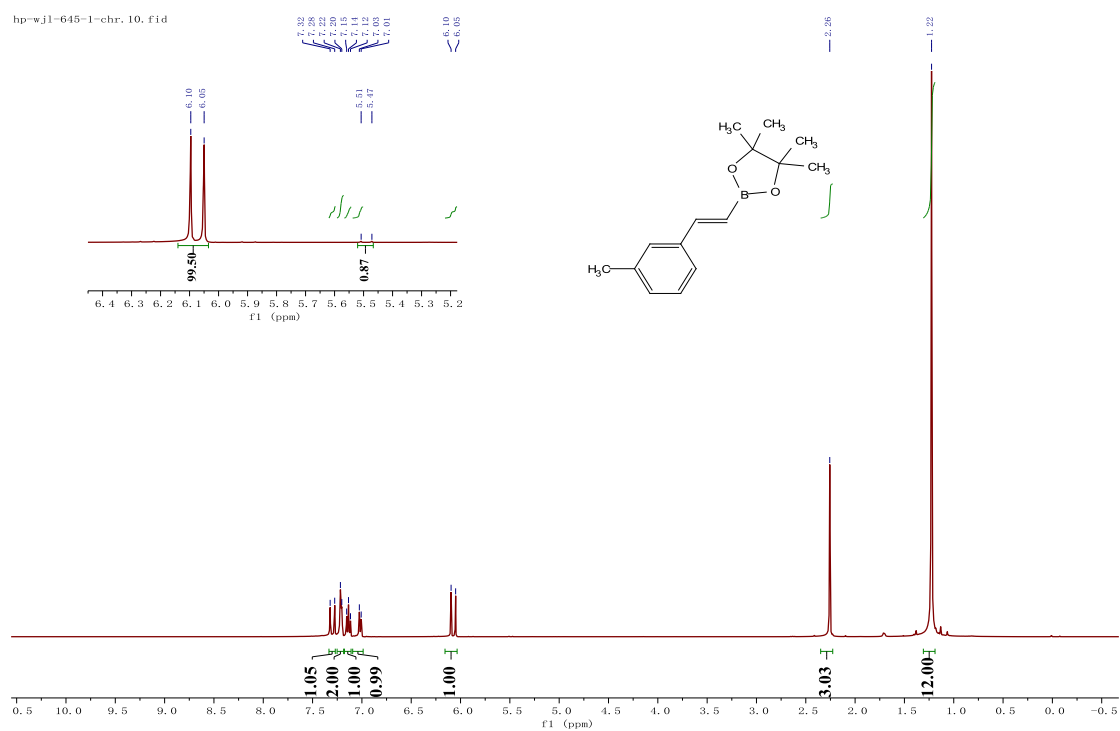

<sup>1</sup>H NMR (400 MHz, Chloroform-d) of E-4b (See procedure)

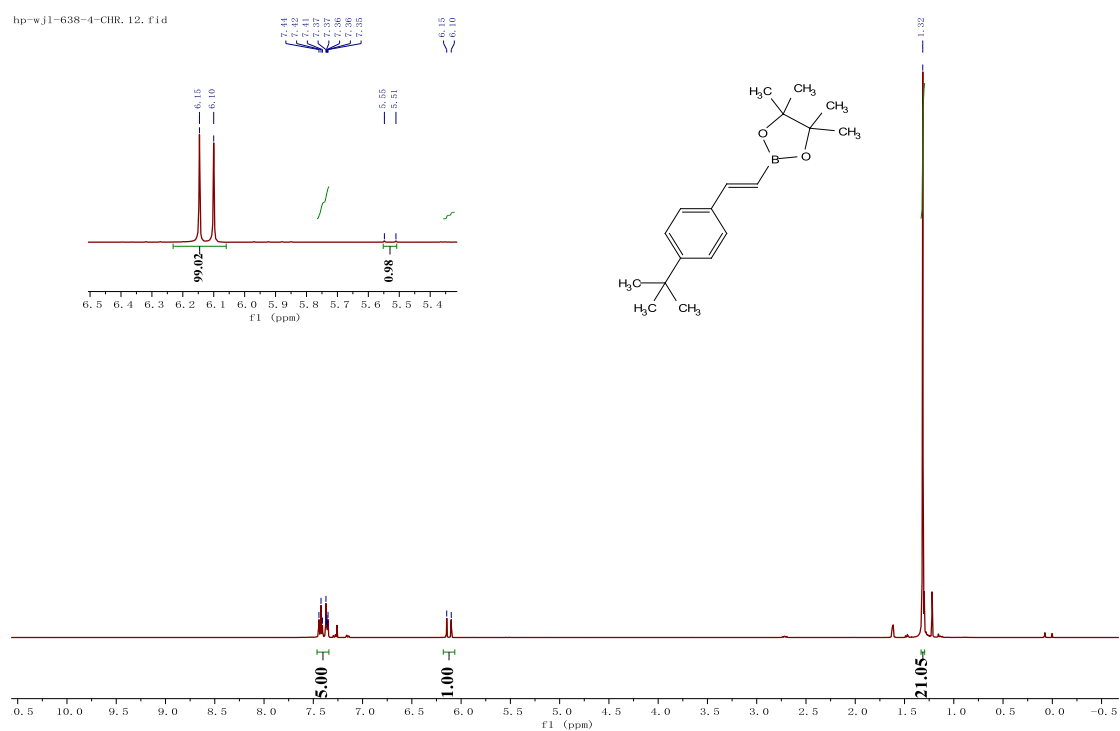

<sup>1</sup>H NMR (400 MHz, Chloroform-d) of E-14b ([See procedure](#))

hp-wj1-646-CHR-7.10.fid

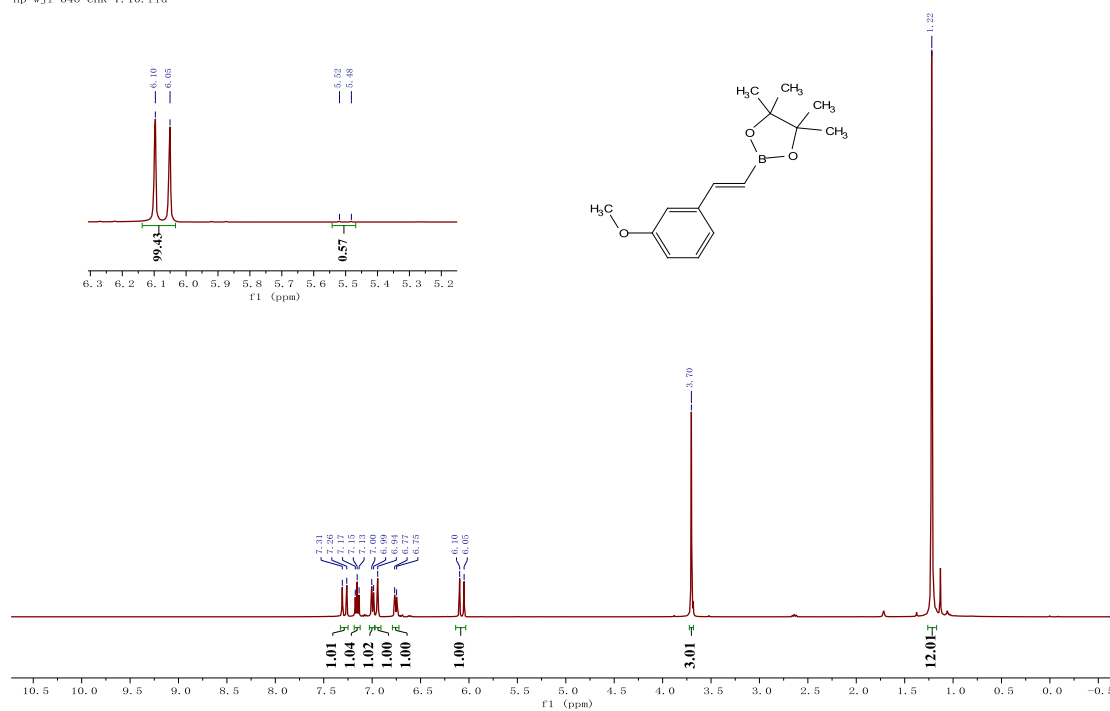

<sup>1</sup>H NMR (400 MHz, Chloroform-d) of E-30b ([See procedure](#))

hp-wj1-667-8.10.fid

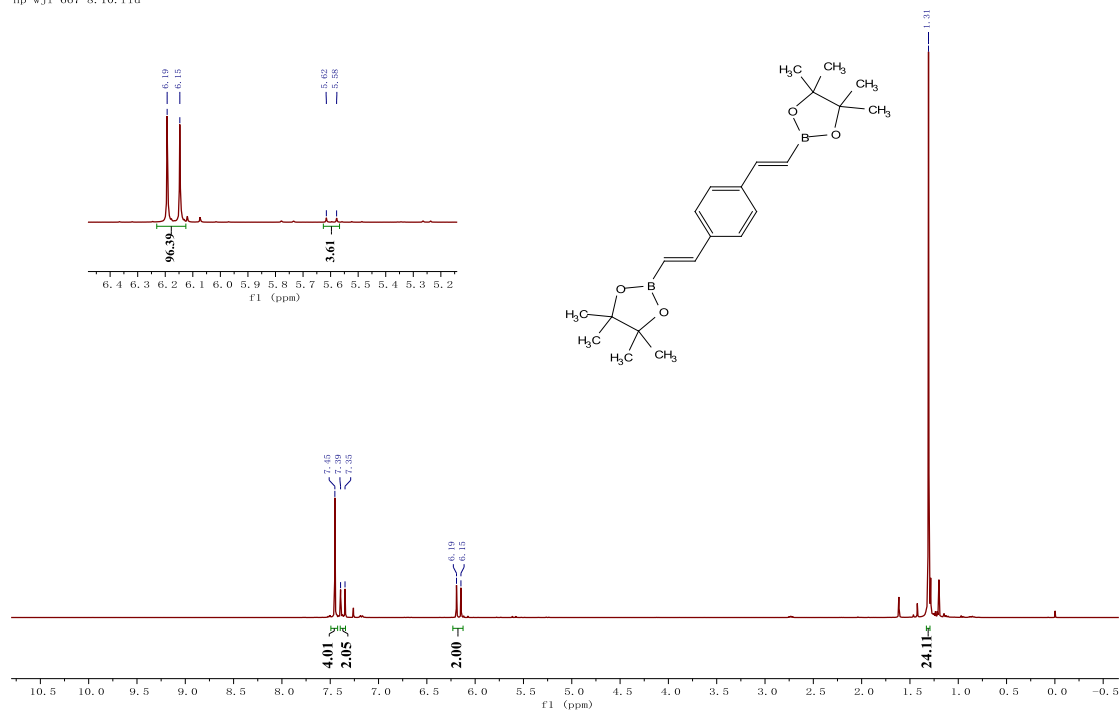

## <sup>1</sup>H NMR (400 MHz, Chloroform-*d*) of E-39b (See procedure)

hp-wj1-659-6-chr\_10.f1d  
PROTON CDC13 [E:\wenj16] wenj16 30

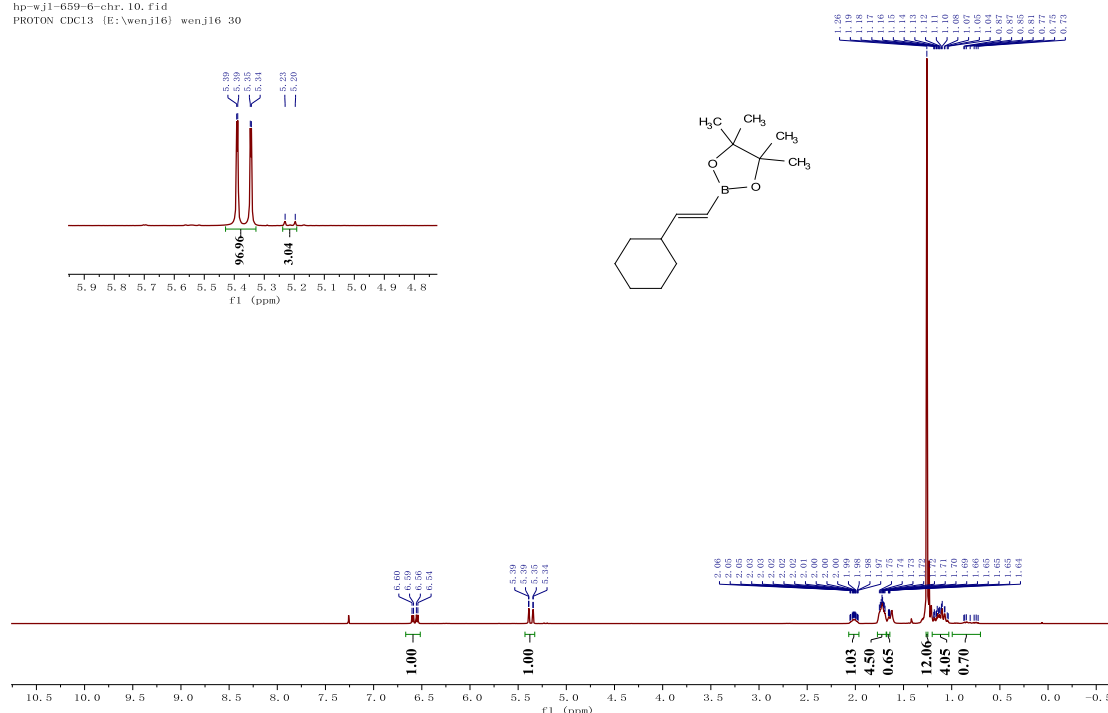

## 8. References

- Scherg, T., Schneider, S. K., Frey, G. D., Schwarz, J., Herdtweck, E., Herrmann, W. A. Bridged Imidazolium Salts Used as Precursors for Chelating Carbene Complexes of Palladium in the Mizoroki-Heck Reaction. *Synlett* **18**, 2894–2907 (2006).
- Gong, H. Y., Rambo, B., Karnas, E., Lynch, V. M., Sessler, J. L. A ‘Texas-sized’ molecular box that forms an anion-induced supramolecular necklace. *Nature Chem* **2**, 406–409 (2010).
- Lan, X., Ye, Z., Liu, J., Huang, M., Shao, Y., Cai, X., Liu, Y., Ke, Z. Sustainable and Selective Alkylation of Deactivated Secondary Alcohols to Ketones by Non-bifunctional Pincer N-heterocyclic Carbene Manganese. *ChemSusChem* **13**, 2557–2563 (2020).
- Andrade, G. A., DiMeglio, J. L., Guardino, E. T., Yap, G. P. A., Rosenthal, J. Synthesis and structure of palladium(II) complexes supported by bis-NHC pincer ligands for the electrochemical activation of CO<sub>2</sub>. *Polyhedron* **135**, 134–143 (2017).
- Koch, A., Kriek, S., Görls, H. & Westerhausen, M. Alkaline Earth Metal–Carbene Complexes with the Versatile Tridentate 2,6-Bis(3-mesitylimidazol-2-ylidene)pyridine Ligand. *Organometallics* **36**, 994–1000 (2017).
- Chan, W., Ho, C., Wong, M. & Che, C. Oxidative Amide Synthesis and N-Terminal  $\alpha$ -Amino Group Ligation of Peptides in Aqueous Medium. *J. Am. Chem. Soc.* **46**, 14796–14797 (2006).
- Xu, C., Du, W., Zeng, Y., Dai, B. & Guo, H. Reactivity Switch Enabled by Counterion: Highly Chemoselective Dimerization and Hydration of Terminal Alkynes. *Org. Lett.* **16**, 948–951 (2014).
- Santandrea, J., Minozzi, C., Cruche, C. & Collins, S. K. Photochemical Dual-Catalytic Synthesis of Alkynyl Sulfides. *Angew. Chem. Int. Ed.* **56**, 12255–12259 (2017).
- Cassar, D. J., Nagaradja, E., Butler, David. C. D., Villemin, D. & Richards, C. J. Regioselective, Stereoselective, and Conformationally Controlled Synthesis of ( $\eta^4$ -Tetraarylcyclobutadiene)( $\eta^5$ -carbomethoxycyclopentadienyl)cobalt Metallocenes. *Org. Lett.* **14**, 894–897 (2012).

10. Shu, C., Liu, R., Liu, S., Li, j., Yu, Y., He, Q., Lu, X. & Ye, L. Practical, Modular, and General Synthesis of 3-Coumaranones through Gold-Catalyzed Intermolecular Alkyne Oxidation Strategy. *Chem. Asian J.* **10**,91–95 (2015).
11. Bens, T., Boden, P., Di Martino-Fumo, P., Beerhues, J., Albold, U., Sobottka, S., Neuman, N. I., Gerhards, M. & Sarkar, B. Chromium(0) and Molybdenum(0) Complexes with a Pyridyl-Mesoionic Carbene Ligand: Structural, (Spectro)electrochemical, Photochemical, and Theoretical Investigations. *Inorg. Chem.* **59**, 15504–15513 (2020).
12. Kolb, B., dos Santos, D. S., Krause, S., Zens, A., Laschat, S. Sequential hydrozirconation/Pd-catalyzed cross coupling of acyl chlorides towards conjugated (2E,4E)-dienones *Beilstein J. Org. Chem.* **19**, 176–185 (2023).
13. Polášek, J., Paciorek, J., Stošek, J., Semrád, H., Munzarová, M. & Mazal C. Stereoselective Bromoboration of Acetylene with Boron Tribromide: Preparation and Cross-Coupling Reactions of (Z)-Bromovinylboronates. *J. Org. Chem.* **85**, 6992–7000 (2020).
14. Garhwal, S., Fridman, N. & de Ruiter, G. Z-Selective Alkyne Functionalization Catalyzed by a trans-Dihydride N-Heterocyclic Carbene (NHC) Iron Complex. *Inorg. Chem.* **59**, 13817-13821 (2020).
15. Nishihara, Y., Kinoshita, M., Hyodo, K., Okuda, Y., Eguchi, R., Goto, H., Hamao, S., Takabayashi, Y. & Kubozono, Y. Phenanthro[1,2-b : 8,7-b']dithiophene: a new picene-type molecule for transistor applications. *RSC Adv.* **3**, 19341-19347 (2013).
16. Gunanathan, C., Hölscher, M., Pan, F. & Leitner, W. Ruthenium Catalyzed Hydroboration of Terminal Alkynes to Z-Vinylboronates. *J. Am. Chem. Soc.* **134**, 14349-14352 (2012).
17. Obligacion, J. V., Neely, J. M., Yazdani, A. N., Pappas, I. & Chirik, P. J. Cobalt Catalyzed Z-Selective Hydroboration of Terminal Alkynes and Elucidation of the Origin of Selectivity. *J. Am. Chem. Soc.* **137**, 5855-5858 (2015).
18. Ohmura, T., Yamamoto, Y. & Miyaura, N. Rhodium- or Iridium-Catalyzed trans-Hydroboration of Terminal Alkynes, Giving (Z)-1-Alkenylboron Compounds. *J. Am. Chem. Soc.* **122**, 4990-4991 (2000).
19. Lyu, Y., Toriumi, N. & Iwasawa, N. (Z)-Selective Hydroboration of Terminal Alkynes Catalyzed by a PSP–Pincer Rhodium Complex. *Org. Lett.* **23**, 9262-9266 (2021).
20. Xu, S. Zhang, Y., Li, B. & Liu, S. Site-Selective and Stereoselective trans-Hydroboration of 1,3-Enynes Catalyzed by 1,4-Azaborine-Based Phosphine–Pd Complex. *J. Am. Chem. Soc.* **138**, 14566-14569 (2016)
21. Magre, M., Maity, B., Falconnet, A., Cavallo, L. & Rueping, M. Magnesium-Catalyzed Hydroboration of Terminal and Internal Alkynes. *Angew. Chem. Int. Ed.* **58**, 7025–7029 (2019).
22. Liu, J., Wu, C., Hu, T., Yang, W., Xie, Y., Shi, Y., Liu, Q., Shao, Y. & Zhang, F. Hexamethyldisilazane Lithium (LiHMDS)-Promoted Hydroboration of Alkynes and Alkenes with Pinacolborane. *J. Org. Chem.* **87**, 3442–3452 (2022).
23. Wannagat, U., Niederprüm, H., *Chem. Ber.* **94**, 1540–1547 (1961).
